# Supplementary material for: Cryo-EM structures of the caspase-activated protein XKR9 involved in apoptotic lipid scrambling
Source: eLife. 2021 Jul 15;10:e69800. doi: 10.7554/eLife.69800 (PMC8298096; doi:10.7554/eLife.69800)
Supplement: Source data 1. [file elife-69800-data1.xlsx]

## Sheet: 1A
rXkr9 full-length
volume [ml]	A280 [mAU]
0	0.037			full raw gel		lane shown
0.037	0.033
0.075	0.034
0.112	0.014
0.15	0.016
0.187	0.024
0.225	0.022
0.262	0.024
0.3	0.015
0.337	0.04
0.375	0.032
0.412	0.025
0.45	0.037
0.487	0.03
0.525	0.028
0.562	0.034
0.6	0.024
0.637	0.025
0.675	0.018
0.712	0.025
0.75	0.022
0.787	0.032
0.825	0.016
0.862	0.027
0.9	0.019
0.937	0.012
0.975	0.021
1.012	0.018
1.05	0.001
1.087	0.018
1.125	0.003
1.162	0
1.2	0.017
1.237	0.022
1.275	0.038
1.312	0.022
1.35	0.014
1.387	0.019
1.425	0.014
1.462	0.025
1.499	0.018
1.537	0.029
1.574	0.02
1.612	0.014
1.649	0.028
1.687	0.025
1.724	0.009
1.762	0.022
1.799	0.02
1.837	0.025
1.874	0.002
1.912	0.02
1.949	0.015
1.987	0.011
2.024	0.039
2.062	0.009
2.099	0.021
2.137	0.013
2.174	0.022
2.212	0.02
2.249	0.022
2.287	0.018
2.324	0.01
2.362	0.006
2.399	0.023
2.437	0.023
2.474	0.006
2.512	0.004
2.549	0.027
2.587	0.007
2.624	0.008
2.662	0.003
2.699	0.014
2.737	0.021
2.774	0.025
2.812	0.019
2.849	0.011
2.887	0.016
2.924	0.039
2.962	0.014
2.999	0.014
3.036	0.018
3.074	0.006
3.111	0.008
3.149	0.017
3.186	0.015
3.224	0.025
3.261	0.025
3.299	0.008
3.336	0.013
3.374	0.037
3.411	0.016
3.449	0.016
3.486	0.017
3.524	0.004
3.561	0.012
3.599	0.034
3.636	0.028
3.674	0.021
3.711	0.026
3.749	0.024
3.786	0.02
3.824	0.032
3.861	0.016
3.899	0.033
3.936	0.02
3.974	0.043
4.011	0.031
4.049	0.019
4.086	0.022
4.124	0.021
4.161	0.021
4.199	0.017
4.236	0.03
4.274	0.01
4.311	0.025
4.349	0.018
4.386	0.023
4.424	0.021
4.461	0.028
4.498	0.04
4.536	0.034
4.573	0.022
4.611	0.023
4.648	0.026
4.686	0.045
4.723	0.031
4.761	0.036
4.798	0.026
4.836	0.02
4.873	0.018
4.911	0.044
4.948	0.017
4.986	0.01
5.023	0.033
5.061	0.029
5.098	0.033
5.136	0.026
5.173	0.035
5.211	0.033
5.248	0.037
5.286	0.031
5.323	0.027
5.361	0.023
5.398	0.033
5.436	0.034
5.473	0.026
5.511	0.037
5.548	0.027
5.586	0.034
5.623	0.043
5.661	0.045
5.698	0.033
5.736	0.029
5.773	0.051
5.811	0.024
5.848	0.032
5.886	0.039
5.923	0.043
5.961	0.042
5.998	0.029
6.035	0.039
6.073	0.047
6.11	0.03
6.148	0.023
6.185	0.037
6.223	0.043
6.26	0.036
6.298	0.041
6.335	0.039
6.373	0.027
6.41	0.026
6.448	0.029
6.485	0.032
6.523	0.036
6.56	0.037
6.598	0.039
6.635	0.039
6.673	0.034
6.71	0.035
6.748	0.029
6.785	0.042
6.823	0.034
6.86	0.056
6.898	0.051
6.935	0.047
6.973	0.064
7.01	0.088
7.048	0.077
7.085	0.086
7.123	0.097
7.16	0.126
7.198	0.127
7.235	0.131
7.273	0.152
7.31	0.199
7.348	0.209
7.385	0.224
7.423	0.255
7.46	0.282
7.497	0.303
7.535	0.348
7.572	0.41
7.61	0.46
7.647	0.55
7.685	0.697
7.722	0.87
7.76	1.129
7.797	1.434
7.835	1.925
7.872	2.57
7.91	3.474
7.947	4.468
7.985	5.77
8.022	7.064
8.06	8.461
8.097	9.704
8.135	11.035
8.172	12.138
8.21	13.201
8.247	13.938
8.285	14.501
8.322	14.705
8.36	14.705
8.397	14.508
8.435	14.179
8.472	13.858
8.51	13.508
8.547	13.214
8.585	12.922
8.622	12.691
8.66	12.449
8.697	12.289
8.735	12.108
8.772	12.004
8.81	11.883
8.847	11.818
8.885	11.745
8.922	11.692
8.96	11.608
8.997	11.58
9.034	11.556
9.072	11.573
9.109	11.565
9.147	11.594
9.184	11.623
9.222	11.702
9.259	11.687
9.297	11.731
9.334	11.785
9.372	11.906
9.409	11.949
9.447	12.014
9.484	12.101
9.522	12.223
9.559	12.286
9.597	12.36
9.634	12.461
9.672	12.611
9.709	12.705
9.747	12.815
9.784	12.917
9.822	13.055
9.859	13.163
9.897	13.241
9.934	13.366
9.972	13.525
10.009	13.677
10.047	13.799
10.084	13.936
10.122	14.089
10.159	14.209
10.197	14.393
10.234	14.557
10.272	14.748
10.309	14.961
10.347	15.174
10.384	15.389
10.422	15.615
10.459	15.836
10.496	16.085
10.534	16.379
10.571	16.659
10.609	16.956
10.646	17.316
10.684	17.626
10.721	17.91
10.759	18.246
10.796	18.64
10.834	19.086
10.871	19.558
10.909	20.058
10.946	20.698
10.984	21.411
11.021	22.126
11.059	22.9
11.096	23.917
11.134	25.089
11.171	26.37
11.209	27.624
11.246	29.227
11.284	30.893
11.321	32.489
11.359	34.077
11.396	35.952
11.434	37.793
11.471	39.669
11.509	41.286
11.546	43.07
11.584	44.704
11.621	46.069
11.659	47.235
11.696	48.503
11.734	49.609
11.771	50.676
11.809	51.392
11.846	52.313
11.884	53.207
11.921	54.155
11.959	55.187
11.996	56.64
12.033	58.387
12.071	60.747
12.108	63.324
12.146	66.855
12.183	70.693
12.221	75.402
12.258	80.367
12.296	86.871
12.333	93.789
12.371	101.745
12.408	109.565
12.446	119.014
12.483	127.851
12.521	137.206
12.558	146.094
12.596	155.903
12.633	164.52
12.671	173.051
12.708	180.49
12.746	187.484
12.783	192.102
12.821	195.987
12.858	198.449
12.896	199.951
12.933	199.649
12.971	197.517
13.008	194.473
13.046	190.297
13.083	184.344
13.121	177.65
13.158	171.054
13.196	163.232
13.233	155.732
13.271	146.828
13.308	138.419
13.346	129.958
13.383	121.948
13.421	113.819
13.458	106.787
13.495	99.113
13.533	92.84
13.57	85.92
13.608	80
13.645	74.003
13.683	68.913
13.72	63.915
13.758	59.667
13.795	55.16
13.833	51.544
13.87	47.828
13.908	44.689
13.945	41.257
13.983	38.643
14.02	36.011
14.058	33.802
14.095	31.386
14.133	29.365
14.17	27.406
14.208	25.917
14.245	24.008
14.283	22.538
14.32	21.105
14.358	19.968
14.395	18.683
14.433	17.535
14.47	16.396
14.508	15.538
14.545	14.476
14.583	13.647
14.62	12.849
14.658	12.166
14.695	11.471
14.733	10.799
14.77	10.168
14.808	9.734
14.845	9.164
14.883	8.73
14.92	8.327
14.958	7.968
14.995	7.631
15.032	7.305
15.07	6.991
15.107	6.767
15.145	6.475
15.182	6.253
15.22	6.046
15.257	5.848
15.295	5.643
15.332	5.452
15.37	5.271
15.407	5.105
15.445	4.932
15.482	4.765
15.52	4.601
15.557	4.487
15.595	4.344
15.632	4.208
15.67	4.079
15.707	3.97
15.745	3.859
15.782	3.77
15.82	3.712
15.857	3.636
15.895	3.601
15.932	3.613
15.97	3.651
16.007	3.732
16.045	3.877
16.082	4.14
16.12	4.499
16.157	4.925
16.195	5.49
16.232	6.083
16.27	6.816
16.307	7.464
16.345	8.176
16.382	8.801
16.42	9.437
16.457	9.951
16.494	10.421
16.532	10.755
16.569	11.009
16.607	11.157
16.644	11.243
16.682	11.237
16.719	11.19
16.757	11.092
16.794	10.891
16.832	10.675
16.869	10.425
16.907	10.163
16.944	9.866
16.982	9.555
17.019	9.206
17.057	8.903
17.094	8.53
17.132	8.185
17.169	7.836
17.207	7.498
17.244	7.159
17.282	6.815
17.319	6.456
17.357	6.169
17.394	5.817
17.432	5.527
17.469	5.215
17.507	4.926
17.544	4.665
17.582	4.414
17.619	4.162
17.657	3.92
17.694	3.674
17.732	3.482
17.769	3.272
17.807	3.092
17.844	2.906
17.882	2.746
17.919	2.571
17.957	2.426
17.994	2.258
18.031	2.163
18.069	2.036
18.106	1.926
18.144	1.818
18.181	1.706
18.219	1.616
18.256	1.542
18.294	1.452
18.331	1.379
18.369	1.28
18.406	1.215
18.444	1.143
18.481	1.099
18.519	1.052
18.556	0.99
18.594	0.954
18.631	0.91
18.669	0.885
18.706	0.847
18.744	0.82
18.781	0.778
18.819	0.751
18.856	0.736
18.894	0.737
18.931	0.72
18.969	0.712
19.006	0.717
19.044	0.746
19.081	0.775
19.119	0.808
19.156	0.836
19.194	0.875
19.231	0.923
19.269	0.96
19.306	1.02
19.344	1.063
19.381	1.096
19.419	1.166
19.456	1.245
19.493	1.282
19.531	1.359
19.568	1.416
19.606	1.476
19.643	1.543
19.681	1.617
19.718	1.655
19.756	1.749
19.793	1.819
19.831	1.871
19.868	1.916
19.906	1.98
19.943	2.038
19.981	2.062
20.018	2.114
20.056	2.129
20.093	2.143
20.131	2.171
20.168	2.162
20.206	2.18
20.243	2.186
20.281	2.202
20.318	2.195
20.356	2.209
20.393	2.219
20.431	2.225
20.468	2.23
20.506	2.256
20.543	2.27
20.581	2.282
20.618	2.267
20.656	2.259
20.693	2.255
20.731	2.209
20.768	2.186
20.806	2.131
20.843	2.072
20.881	1.995
20.918	1.919
20.956	1.824
20.993	1.743
21.03	1.661
21.068	1.56
21.105	1.48
21.143	1.392
21.18	1.277
21.218	1.218
21.255	1.127
21.293	1.039
21.33	0.97
21.368	0.894
21.405	0.835
21.443	0.78
21.48	0.701
21.518	0.664
21.555	0.621
21.593	0.574
21.63	0.554
21.668	0.512
21.705	0.486
21.743	0.494
21.78	0.471
21.818	0.456
21.855	0.495
21.893	0.502
21.93	0.532
21.968	0.568
22.005	0.607
22.043	0.641
22.08	0.692
22.118	0.746
22.155	0.778
22.193	0.82
22.23	0.852
22.268	0.885
22.305	0.899
22.343	0.918
22.38	0.908
22.418	0.908
22.455	0.915
22.492	0.895
22.53	0.866
22.567	0.843
22.605	0.816
22.642	0.778
22.68	0.726
22.717	0.691
22.755	0.659
22.792	0.609
22.83	0.585
22.867	0.544
22.905	0.511
22.942	0.476
22.98	0.451
23.017	0.412
23.055	0.377
23.092	0.363
23.13	0.326
23.167	0.307
23.205	0.293
23.242	0.28
23.28	0.283
23.317	0.272
23.355	0.254
23.392	0.238
23.43	0.217
23.467	0.231
23.505	0.227
23.542	0.207
23.58	0.202
23.617	0.186
23.655	0.194
23.692	0.179
23.73	0.158
23.767	0.187
23.805	0.154
23.842	0.154
23.88	0.151
23.917	0.146
23.955	0.165
23.992	0.141
24.029	0.128
24.067	0.13
24.104	0.141
24.142	0.128
24.179	0.118
24.217	0.122
24.254	0.131
24.292	0.147
24.329	0.121
24.367	0.12
24.404	0.14
24.442	0.162
24.479	0.137
24.517	0.247
24.554	0.223
24.592	0.19
24.629	0.182
24.667	0.181
24.704	0.175
24.742	0.176
24.779	0.16
24.817	0.15
24.854	0.159
24.892	0.189
24.929	0.185
24.967	0.17
25.004	0.142
25.042	0.135
25.079	0.15
25.117	0.129
25.154	0.142
25.192	0.134
25.229	0.13
25.267	0.15
25.304	0.137
25.342	0.125
25.379	0.115
25.417	0.129
25.454	0.137
25.491	0.122
25.529	0.128
25.566	0.106
25.604	0.14
25.641	0.133
25.679	0.139
25.716	0.114
25.754	0.118
25.791	0.117
25.829	0.127
25.866	0.135
25.904	0.118
25.941	0.119
25.979	0.113
26.016	0.114
26.054	0.125
26.091	0.121
26.129	0.111
26.166	0.113
26.204	0.093
26.241	0.128
26.279	0.099
26.316	0.108
26.354	0.112
26.391	0.11
26.429	0.121
26.466	0.115
26.504	0.123
26.541	0.126
26.579	0.12
26.616	0.132
26.654	0.135
26.691	0.149
26.729	0.146
26.766	0.171
26.804	0.16
26.841	0.184
26.879	0.174
26.916	0.19
26.954	0.172
26.991	0.196
27.028	0.203
27.066	0.18
27.103	0.191
27.141	0.178
27.178	0.178
27.216	0.197
27.253	0.174
27.291	0.19
27.328	0.169
27.366	0.175
27.403	0.178
27.441	0.157
27.478	0.18
27.516	0.158
27.553	0.16
27.591	0.149
27.628	0.144
27.666	0.146
27.703	0.147
27.741	0.148
27.778	0.138
27.816	0.123
27.853	0.106
27.891	0.131
27.928	0.099
27.966	0.109
28.003	0.117
28.041	0.105
28.078	0.101
28.116	0.123
28.153	0.111
28.191	0.101
28.228	0.109
28.266	0.092
28.303	0.11
28.341	0.11
28.378	0.118
28.416	0.103
28.453	0.103
28.49	0.102
28.528	0.113
28.565	0.11
28.603	0.112
28.64	0.103
28.678	0.107
28.715	0.118
28.753	0.107
28.79	0.111
28.828	0.1
28.865	0.113
28.903	0.107
28.94	0.096
28.978	0.127
29.015	0.129
29.053	0.114
29.09	0.122
29.128	0.115
29.165	0.118
29.203	0.121
29.24	0.127
29.278	0.124
29.315	0.125
29.353	0.125
29.39	0.155
29.428	0.136
29.465	0.138
29.503	0.124
29.54	0.132
29.578	0.145
29.615	0.144
29.653	0.16
29.69	0.139
29.728	0.157
29.765	0.147
29.803	0.147
29.84	0.152
29.878	0.172
29.915	0.159
29.953	0.165
29.99	0.161
30.027	0.163
30.065	0.162
30.102	0.15
30.14	0.17
30.177	0.162
30.215	0.154
30.252	0.138
30.29	0.154
30.327	0.148
30.365	0.164
30.402	0.136
30.44	0.14
30.477	0.14
30.515	0.138
30.552	0.138
30.59	0.114
30.627	0.127
30.665	0.131
30.702	0.13
30.74	0.125
30.777	0.139
30.815	0.124
30.852	0.143
30.89	0.127
30.927	0.128
30.965	0.118
31.002	0.106
31.04	0.133
31.077	0.127
31.115	0.123
31.152	0.135
31.19	0.136
31.227	0.111
31.265	0.115
31.302	0.107
31.34	0.123
31.377	0.099
31.415	0.091
31.452	0.11
31.489	0.123
31.527	0.112
31.564	0.105
31.602	0.093
31.639	0.102
31.677	0.11
31.714	0.116
31.752	0.094
31.789	0.094
31.827	0.116
31.864	0.108
31.902	0.106
31.939	0.122
31.977	0.1
32.014	0.12
32.052	0.114
32.089	0.125
32.127	0.092
32.164	0.116
32.202	0.121
32.239	0.114
32.277	0.104
32.314	0.117
32.352	0.137
32.389	0.104
32.427	0.14
32.464	0.099
32.502	0.098
32.539	0.085
32.577	0.113
32.614	0.089
32.652	0.134
32.689	0.099
32.727	0.112
32.764	0.111
32.802	0.103
32.839	0.12
32.877	0.122
32.914	0.121
32.952	0.113
32.989	0.097
33.026	0.109
33.064	0.1
33.101	0.113
33.139	0.098
33.176	0.112
33.214	0.106
33.251	0.111
33.289	0.109
33.326	0.122
33.364	0.114
33.401	0.117
33.439	0.1
33.476	0.113
33.514	0.115
33.551	0.113
33.589	0.118
33.626	0.117
33.664	0.104
33.701	0.097
33.739	0.119
33.776	0.118
33.814	0.126
33.851	0.083
33.889	0.095
33.926	0.12
33.964	0.116
1.21137	0.100136
1.21271	0.100136
1.21404	0.0991821
1.21537	0.0977516
1.21671	0.0963211
1.21804	0.0958443
1.21937	0.0953674
1.22071	0.0958443
1.22204	0.0972748
1.22337	0.0982285
1.22471	0.0991821
1.22604	0.100136
1.22737	0.101089
1.22871	0.101089
1.23004	0.100136
1.23137	0.0991821
1.23271	0.0982285
1.23404	0.0977516
1.23537	0.0982285
1.23671	0.0982285
1.23804	0.0987053
1.23937	0.0987053
1.24071	0.0987053
1.24204	0.0987053
1.24337	0.0987053
1.24471	0.0987053
1.24604	0.0991821
1.24737	0.0987053
1.24871	0.0982285
1.25004	0.0977516
1.25137	0.0972748
1.25271	0.0967979
1.25404	0.0967979
1.25537	0.0977516
1.25671	0.0991821
1.25804	0.099659
1.25937	0.0991821
1.26071	0.0987053
1.26204	0.0982285
1.26337	0.0972748
1.26471	0.0963211
1.26604	0.0963211
1.26737	0.0972748
1.26871	0.0987053
1.27004	0.0991821
1.27137	0.0991821
1.27271	0.0991821
1.27404	0.0991821
1.27537	0.0982285
1.27671	0.0967979
1.27804	0.0958443
1.27937	0.0953674
1.28071	0.0953674
1.28204	0.0948906
1.28337	0.0953674
1.28471	0.0963211
1.28604	0.0972748
1.28737	0.0982285
1.28871	0.0991821
1.29004	0.0991821
1.29137	0.0987053
1.29271	0.0982285
1.29404	0.0982285
1.29537	0.0977516
1.29671	0.0972748
1.29804	0.0977516
1.29937	0.0987053
1.30071	0.100136
1.30204	0.102043
1.30337	0.103474
1.30471	0.103951
1.30604	0.103951
1.30737	0.10252
1.30871	0.101089
1.31004	0.100136
1.31137	0.100136
1.31271	0.101089
1.31404	0.102997
1.31537	0.104427
1.31671	0.103951
1.31804	0.102997
1.31937	0.101566
1.32071	0.100136
1.32204	0.099659
1.32337	0.100136
1.32471	0.101089
1.32604	0.102043
1.32737	0.10252
1.32871	0.10252
1.33004	0.102043
1.33137	0.101566
1.33271	0.101089
1.33404	0.101566
1.33537	0.102997
1.33671	0.104904
1.33804	0.105381
1.33937	0.104904
1.34071	0.104427
1.34204	0.103951
1.34337	0.102997
1.34471	0.102043
1.34604	0.101566
1.34737	0.10252
1.34871	0.103474
1.35004	0.103474
1.35137	0.102997
1.35271	0.102997
1.35404	0.103951
1.35537	0.104427
1.35671	0.104427
1.35804	0.103951
1.35937	0.103951
1.36071	0.103951
1.36204	0.103474
1.36337	0.103474
1.36471	0.103474
1.36604	0.104427
1.36737	0.105381
1.36871	0.105381
1.37004	0.105858
1.37137	0.105858
1.37271	0.105858
1.37404	0.105858
1.37537	0.104904
1.37671	0.103951
1.37804	0.103474
1.37937	0.103474
1.38071	0.102997
1.38204	0.102997
1.38337	0.10252
1.38471	0.10252
1.38604	0.10252
1.38737	0.10252
1.38871	0.10252
1.39004	0.101566
1.39137	0.102043
1.39271	0.10252
1.39404	0.102997
1.39537	0.102997
1.39671	0.103474
1.39804	0.103951
1.39937	0.104904
1.40071	0.105381
1.40204	0.105381
1.40337	0.105381
1.40471	0.105858
1.40604	0.106335
1.40737	0.106335
1.40871	0.106335
1.41004	0.106812
1.41137	0.106812
1.41271	0.106335
1.41404	0.106335
1.41537	0.106335
1.41671	0.106335
1.41804	0.105858
1.41937	0.105381
1.42071	0.105381
1.42204	0.105381
1.42337	0.104904
1.42471	0.104427
1.42604	0.104904
1.42737	0.105381
1.42871	0.105858
1.43004	0.105381
1.43137	0.104904
1.43271	0.104904
1.43404	0.105858
1.43537	0.106335
1.43671	0.106335
1.43804	0.106335
1.43937	0.105858
1.44071	0.105381
1.44204	0.104427
1.44337	0.104904
1.44471	0.106335
1.44604	0.108242
1.44737	0.109673
1.44871	0.110626
1.45004	0.111103
1.45137	0.110149
1.45271	0.109196
1.45404	0.108719
1.45537	0.108719
1.45671	0.108719
1.45804	0.108242
1.45937	0.108242
1.46071	0.108719
1.46204	0.108719
1.46337	0.108242
1.46471	0.107765
1.46604	0.107765
1.46737	0.107288
1.46871	0.106335
1.47004	0.104904
1.47137	0.104904
1.47271	0.105858
1.47404	0.106812
1.47537	0.108242
1.47671	0.110149
1.47804	0.112057
1.47937	0.113487
1.48071	0.113964
1.48204	0.113964
1.48337	0.113964
1.48471	0.113487
1.48604	0.112534
1.48737	0.11158
1.48871	0.111103
1.49004	0.111103
1.49137	0.112057
1.49271	0.112057
1.49404	0.112534
1.49537	0.112057
1.49671	0.11158
1.49804	0.110626
1.49937	0.110149
1.50071	0.110626
1.50204	0.110626
1.50337	0.111103
1.50471	0.110626
1.50604	0.110626
1.50737	0.110149
1.50871	0.110149
1.51004	0.110626
1.51137	0.111103
1.51271	0.112057
1.51404	0.11301
1.51537	0.113487
1.51671	0.113964
1.51804	0.114441
1.51937	0.114918
1.52071	0.114918
1.52204	0.114918
1.52337	0.114918
1.52471	0.114441
1.52604	0.113964
1.52737	0.11301
1.52871	0.112057
1.53004	0.111103
1.53137	0.111103
1.53271	0.11158
1.53404	0.112534
1.53537	0.113964
1.53671	0.116348
1.53804	0.118732
1.53937	0.12064
1.54071	0.12207
1.54204	0.122547
1.54337	0.123024
1.54471	0.122547
1.54604	0.12207
1.54737	0.121593
1.54871	0.121117
1.55004	0.12064
1.55137	0.12064
1.55271	0.121117
1.55404	0.12064
1.55537	0.120163
1.55671	0.119686
1.55804	0.119686
1.55937	0.119209
1.56071	0.118732
1.56204	0.118732
1.56337	0.118732
1.56471	0.119686
1.56604	0.120163
1.56737	0.12064
1.56871	0.121117
1.57004	0.121593
1.57137	0.121593
1.57271	0.12207
1.57404	0.123501
1.57537	0.124931
1.57671	0.126362
1.57804	0.128269
1.57937	0.130177
1.58071	0.13113
1.58204	0.130653
1.58337	0.130177
1.58471	0.1297
1.58604	0.128746
1.58737	0.127316
1.58871	0.126362
1.59004	0.125408
1.59137	0.123978
1.59271	0.123978
1.59404	0.124454
1.59537	0.125408
1.59671	0.125885
1.59804	0.126362
1.59937	0.126362
1.60071	0.126839
1.60204	0.127316
1.60337	0.127792
1.60471	0.129223
1.60604	0.130653
1.60737	0.130653
1.60871	0.130177
1.61004	0.128746
1.61137	0.126839
1.61271	0.123978
1.61404	0.121593
1.61537	0.12064
1.61671	0.12064
1.61804	0.12064
1.61937	0.12064
1.62071	0.12064
1.62204	0.12064
1.62337	0.120163
1.62471	0.119686
1.62604	0.119686
1.62737	0.12064
1.62871	0.12207
1.63004	0.123501
1.63137	0.125408
1.63271	0.126839
1.63404	0.127792
1.63537	0.127792
1.63671	0.127316
1.63804	0.127792
1.63937	0.128269
1.64071	0.128269
1.64204	0.127316
1.64337	0.126839
1.64471	0.127316
1.64604	0.127316
1.64737	0.127316
1.64871	0.127316
1.65004	0.127792
1.65137	0.128746
1.65271	0.128746
1.65404	0.128746
1.65537	0.129223
1.65671	0.1297
1.65804	0.13113
1.65937	0.133514
1.66071	0.134945
1.66204	0.136375
1.66337	0.136852
1.66471	0.135899
1.66604	0.134468
1.66737	0.132084
1.66871	0.129223
1.67004	0.127316
1.67137	0.125885
1.67271	0.124454
1.67404	0.123501
1.67537	0.122547
1.67671	0.121593
1.67804	0.12064
1.67937	0.120163
1.68071	0.120163
1.68204	0.120163
1.68337	0.121117
1.68471	0.121593
1.68604	0.12207
1.68737	0.12207
1.68871	0.122547
1.69004	0.122547
1.69137	0.123978
1.69271	0.124931
1.69404	0.125885
1.69537	0.126362
1.69671	0.126839
1.69804	0.126839
1.69937	0.126839
1.70071	0.125885
1.70204	0.124931
1.70337	0.123978
1.70471	0.123024
1.70604	0.12207
1.70737	0.12064
1.70871	0.119209
1.71004	0.118256
1.71137	0.118732
1.71271	0.118256
1.71404	0.117779
1.71537	0.116348
1.71671	0.115395
1.71804	0.115395
1.71937	0.114918
1.72071	0.115395
1.72204	0.115871
1.72337	0.116348
1.72471	0.116825
1.72604	0.117779
1.72737	0.118256
1.72871	0.118256
1.73004	0.118256
1.73137	0.118256
1.73271	0.118256
1.73404	0.118732
1.73537	0.119209
1.73671	0.121117
1.73804	0.123501
1.73937	0.125408
1.74071	0.126362
1.74204	0.126362
1.74337	0.125408
1.74471	0.124454
1.74604	0.122547
1.74737	0.121117
1.74871	0.12064
1.75004	0.121593
1.75137	0.12207
1.75271	0.122547
1.75404	0.123978
1.75537	0.125885
1.75671	0.127792
1.75804	0.129223
1.75937	0.130653
1.76071	0.131607
1.76204	0.132561
1.76337	0.133038
1.76471	0.133514
1.76604	0.133514
1.76737	0.133514
1.76871	0.133514
1.77004	0.133514
1.77137	0.133038
1.77271	0.133038
1.77404	0.133991
1.77537	0.134945
1.77671	0.135899
1.77804	0.136852
1.77937	0.137329
1.78071	0.137329
1.78204	0.137806
1.78337	0.138283
1.78471	0.138283
1.78604	0.139236
1.78737	0.140667
1.78871	0.143051
1.79004	0.144482
1.79137	0.146389
1.79271	0.148296
1.79404	0.150204
1.79537	0.151634
1.79671	0.152588
1.79804	0.153542
1.79937	0.153542
1.80071	0.153542
1.80204	0.153542
1.80337	0.153542
1.80471	0.154018
1.80604	0.155926
1.80737	0.159264
1.80871	0.163555
1.81004	0.167847
1.81137	0.171661
1.81271	0.174046
1.81404	0.175476
1.81537	0.175476
1.81671	0.174046
1.81804	0.172615
1.81937	0.171661
1.82071	0.171185
1.82204	0.171661
1.82337	0.172615
1.82471	0.174522
1.82604	0.17643
1.82737	0.178337
1.82871	0.181198
1.83004	0.184059
1.83137	0.186443
1.83271	0.188828
1.83404	0.191212
1.83537	0.19455
1.83671	0.197411
1.83804	0.200272
1.83937	0.204086
1.84071	0.207424
1.84204	0.210762
1.84337	0.2141
1.84471	0.217915
1.84604	0.221252
1.84737	0.224113
1.84871	0.226498
1.85004	0.228882
1.85137	0.231266
1.85271	0.234127
1.85404	0.236988
1.85537	0.239849
1.85671	0.24271
1.85804	0.246048
1.85937	0.249386
1.86071	0.252247
1.86204	0.255585
1.86337	0.258923
1.86471	0.263214
1.86604	0.267982
1.86737	0.272751
1.86871	0.277996
1.87004	0.283241
1.87137	0.288486
1.87271	0.293255
1.87404	0.2985
1.87537	0.303745
1.87671	0.30899
1.87804	0.314236
1.87937	0.319004
1.88071	0.323772
1.88204	0.329018
1.88337	0.33474
1.88471	0.340939
1.88604	0.347614
1.88737	0.355244
1.88871	0.36335
1.89004	0.371456
1.89137	0.379086
1.89271	0.386715
1.89404	0.394821
1.89537	0.403404
1.89671	0.412464
1.89804	0.422478
1.89937	0.432014
1.90071	0.442028
1.90204	0.452042
1.90337	0.463009
1.90471	0.473022
1.90604	0.483036
1.90737	0.492573
1.90871	0.50211
1.91004	0.5126
1.91137	0.522614
1.91271	0.533581
1.91404	0.545502
1.91537	0.557899
1.91671	0.571728
1.91804	0.585556
1.91937	0.599861
1.92071	0.614166
1.92204	0.629425
1.92337	0.644684
1.92471	0.660419
1.92604	0.676632
1.92737	0.692844
1.92871	0.710487
1.93004	0.729084
1.93137	0.748158
1.93271	0.767231
1.93404	0.786781
1.93537	0.808239
1.93671	0.83065
1.93804	0.853062
1.93937	0.876427
1.94071	0.901222
1.94204	0.926495
1.94337	0.95129
1.94471	0.976086
1.94604	1.00183
1.94737	1.02949
1.94871	1.05762
1.95004	1.08671
1.95137	1.11771
1.95271	1.15013
1.95404	1.18256
1.95537	1.21546
1.95671	1.24931
1.95804	1.28269
1.95937	1.31607
1.96071	1.3504
1.96204	1.38712
1.96337	1.42574
1.96471	1.46627
1.96604	1.50919
1.96737	1.55354
1.96871	1.59979
1.97004	1.647
1.97137	1.6942
1.97271	1.74093
1.97404	1.78766
1.97537	1.83582
1.97671	1.88541
1.97804	1.93596
1.97937	1.98841
1.98071	2.04277
1.98204	2.09951
1.98337	2.15769
1.98471	2.21729
1.98604	2.27785
1.98737	2.33984
1.98871	2.40326
1.99004	2.46906
1.99137	2.5363
1.99271	2.60496
1.99404	2.67506
1.99537	2.74706
1.99671	2.82001
1.99804	2.89488
1.99937	2.97165
2.00071	3.05033
2.00204	3.13139
2.00337	3.21388
2.00471	3.29828
2.00604	3.38507
2.00737	3.47471
2.00871	3.5677
2.01004	3.66402
2.01137	3.76368
2.01271	3.8662
2.01404	3.97205
2.01537	4.07934
2.01671	4.18854
2.01804	4.30107
2.01937	4.41742
2.02071	4.53806
2.02204	4.66347
2.02337	4.79269
2.02471	4.92573
2.02604	5.06163
2.02737	5.20086
2.02871	5.34391
2.03004	5.49173
2.03137	5.64432
2.03271	5.8012
2.03404	5.96428
2.03537	6.1326
2.03671	6.30569
2.03804	6.48355
2.03937	6.66714
2.04071	6.85692
2.04204	7.05385
2.04337	7.25698
2.04471	7.46632
2.04604	7.68232
2.04737	7.90501
2.04871	8.13437
2.05004	8.37088
2.05137	8.61406
2.05271	8.86488
2.05404	9.12285
2.05537	9.3894
2.05671	9.66406
2.05804	9.94635
2.05937	10.2344
2.06071	10.53
2.06204	10.8337
2.06337	11.1451
2.06471	11.4646
2.06604	11.7927
2.06737	12.1293
2.06871	12.4736
2.07004	12.8255
2.07137	13.1841
2.07271	13.5484
2.07404	13.9189
2.07537	14.297
2.07671	14.6823
2.07804	15.0752
2.07937	15.4757
2.08071	15.8844
2.08204	16.3002
2.08337	16.7217
2.08471	17.148
2.08604	17.5796
2.08737	18.0159
2.08871	18.4579
2.09004	18.9042
2.09137	19.3543
2.09271	19.8083
2.09404	20.2651
2.09537	20.7243
2.09671	21.1854
2.09804	21.6479
2.09937	22.1124
2.10071	22.5787
2.10204	23.0465
2.10337	23.5133
2.10471	23.9792
2.10604	24.4431
2.10737	24.9043
2.10871	25.363
2.11004	25.8179
2.11137	26.2694
2.11271	26.7172
2.11404	27.1602
2.11537	27.5974
2.11671	28.028
2.11804	28.4524
2.11937	28.8692
2.12071	29.2802
2.12204	29.6845
2.12337	30.0822
2.12471	30.4718
2.12604	30.8518
2.12737	31.2228
2.12871	31.5824
2.13004	31.93
2.13137	32.2661
2.13271	32.5909
2.13404	32.9051
2.13537	33.2069
2.13671	33.4964
2.13804	33.7729
2.13937	34.0357
2.14071	34.2836
2.14204	34.5173
2.14337	34.7366
2.14471	34.9422
2.14604	35.1348
2.14737	35.3136
2.14871	35.4795
2.15004	35.6321
2.15137	35.7699
2.15271	35.893
2.15404	36.0017
2.15537	36.097
2.15671	36.1791
2.15804	36.2477
2.15937	36.3021
2.16071	36.3417
2.16204	36.3665
2.16337	36.376
2.16471	36.3698
2.16604	36.3493
2.16737	36.315
2.16871	36.2678
2.17004	36.2072
2.17137	36.1342
2.17271	36.0494
2.17404	35.9511
2.17537	35.84
2.17671	35.717
2.17804	35.5816
2.17937	35.4347
2.18071	35.2764
2.18204	35.1071
2.18337	34.9274
2.18471	34.7371
2.18604	34.5359
2.18737	34.3251
2.18871	34.1034
2.19004	33.8712
2.19137	33.6299
2.19271	33.3796
2.19404	33.1216
2.19537	32.8565
2.19671	32.5847
2.19804	32.3057
2.19937	32.0191
2.20071	31.7249
2.20204	31.4231
2.20337	31.1151
2.20471	30.8008
2.20604	30.4818
2.20737	30.1585
2.20871	29.8324
2.21004	29.5024
2.21137	29.1681
2.21271	28.8291
2.21404	28.4858
2.21537	28.1396
2.21671	27.7901
2.21804	27.4382
2.21937	27.0848
2.22071	26.7301
2.22204	26.3734
2.22337	26.0143
2.22471	25.6534
2.22604	25.2914
2.22737	24.929
2.22871	24.5657
2.23004	24.2028
2.23137	23.8414
2.23271	23.4809
2.23404	23.1209
2.23537	22.7613
2.23671	22.4032
2.23804	22.0466
2.23937	21.6904
2.24071	21.3361
2.24204	20.9842
2.24337	20.6337
2.24471	20.2847
2.24604	19.9361
2.24737	19.5889
2.24871	19.2432
2.25004	18.8994
2.25137	18.559
2.25271	18.2223
2.25404	17.89
2.25537	17.561
2.25671	17.2343
2.25804	16.9115
2.25937	16.592
2.26071	16.2754
2.26204	15.9616
2.26337	15.6517
2.26471	15.347
2.26604	15.0466
2.26737	14.75
2.26871	14.4563
2.27004	14.1659
2.27137	13.8774
2.27271	13.5927
2.27404	13.3114
2.27537	13.0343
2.27671	12.7621
2.27804	12.4946
2.27937	12.2323
2.28071	11.9739
2.28204	11.7173
2.28337	11.4646
2.28471	11.2147
2.28604	10.9692
2.28737	10.7269
2.28871	10.4899
2.29004	10.2577
2.29137	10.0298
2.29271	9.80568
2.29404	9.5849
2.29537	9.36794
2.29671	9.1548
2.29804	8.94499
2.29937	8.73899
2.30071	8.53682
2.30204	8.33893
2.30337	8.14533
2.30471	7.95603
2.30604	7.77006
2.30737	7.58791
2.30871	7.40957
2.31004	7.236
2.31137	7.06577
2.31271	6.8984
2.31404	6.73389
2.31537	6.57272
2.31671	6.41441
2.31804	6.25896
2.31937	6.1059
2.32071	5.95713
2.32204	5.81169
2.32337	5.67055
2.32471	5.53322
2.32604	5.39923
2.32737	5.26762
2.32871	5.13792
2.33004	5.0106
2.33137	4.8852
2.33271	4.7617
2.33404	4.64058
2.33537	4.5228
2.33671	4.40979
2.33804	4.30059
2.33937	4.19474
2.34071	4.09174
2.34204	3.99065
2.34337	3.89194
2.34471	3.79467
2.34604	3.6993
2.34737	3.60632
2.34871	3.51524
2.35004	3.42655
2.35137	3.34024
2.35271	3.2568
2.35404	3.17478
2.35537	3.09467
2.35671	3.01647
2.35804	2.94018
2.35937	2.86484
2.36071	2.7914
2.36204	2.71988
2.36337	2.65026
2.36471	2.58255
2.36604	2.51722
2.36737	2.45285
2.36871	2.38848
2.37004	2.32553
2.37137	2.26355
2.37271	2.20346
2.37404	2.14481
2.37537	2.08807
2.37671	2.03323
2.37804	1.9803
2.37937	1.92928
2.38071	1.87969
2.38204	1.83153
2.38337	1.78528
2.38471	1.74093
2.38604	1.69754
2.38737	1.65415
2.38871	1.61219
2.39004	1.5707
2.39137	1.53017
2.39271	1.48964
2.39404	1.44958
2.39537	1.41144
2.39671	1.3752
2.39804	1.34039
2.39937	1.30749
2.40071	1.27554
2.40204	1.24454
2.40337	1.21355
2.40471	1.18208
2.40604	1.15108
2.40737	1.12057
2.40871	1.09053
2.41004	1.06144
2.41137	1.03426
2.41271	1.00851
2.41404	0.982285
2.41537	0.955582
2.41671	0.929832
2.41804	0.905514
2.41937	0.881195
2.42071	0.857353
2.42204	0.834942
2.42337	0.814438
2.42471	0.794888
2.42604	0.776768
2.42737	0.758171
2.42871	0.739574
2.43004	0.720978
2.43137	0.701904
2.43271	0.682354
2.43404	0.66328
2.43537	0.645161
2.43671	0.628471
2.43804	0.612259
2.43937	0.597
2.44071	0.582218
2.44204	0.56839
2.44337	0.554562
2.44471	0.540733
2.44604	0.527382
2.44737	0.51403
2.44871	0.500679
2.45004	0.487328
2.45137	0.473499
2.45271	0.460148
2.45404	0.448227
2.45537	0.436783
2.45671	0.426292
2.45804	0.416279
2.45937	0.406742
2.46071	0.397682
2.46204	0.387669
2.46337	0.377178
2.46471	0.366688
2.46604	0.356197
2.46737	0.346661
2.46871	0.338078
2.47004	0.330448
2.47137	0.322819
2.47271	0.315666
2.47404	0.30899
2.47537	0.302315
2.47671	0.295639
2.47804	0.288963
2.47937	0.282288
2.48071	0.275612
2.48204	0.269413
2.48337	0.262737
2.48471	0.256062
2.48604	0.249386
2.48737	0.243187
2.48871	0.236988
2.49004	0.230312
2.49137	0.22316
2.49271	0.21553
2.49404	0.208855
2.49537	0.202179
2.49671	0.195503
2.49804	0.190258
2.49937	0.185966
2.50071	0.182629
2.50204	0.180244
2.50337	0.178337
2.50471	0.17643
2.50604	0.175476
2.50737	0.174522
2.50871	0.173569
2.51004	0.172615
2.51137	0.172615
2.51271	0.172138
2.51404	0.171661
2.51537	0.170231
2.51671	0.167847
2.51804	0.164986
2.51937	0.162601
2.52071	0.159264
2.52204	0.155926
2.52337	0.152588
2.52471	0.14925
2.52604	0.146389
2.52737	0.143528
2.52871	0.14019
2.53004	0.137806
2.53137	0.135899
2.53271	0.133991
2.53404	0.131607
2.53537	0.1297
2.53671	0.127792
2.53804	0.125408
2.53937	0.123978
2.54071	0.123024
2.54204	0.122547
2.54337	0.121117
2.54471	0.119686
2.54604	0.118732
2.54737	0.117302
2.54871	0.115395
2.55004	0.11301
2.55137	0.112057
2.55271	0.112057
2.55404	0.112534
2.55537	0.11301
2.55671	0.11301
2.55804	0.11301
2.55937	0.112534
2.56071	0.110626
2.56204	0.108719
2.56337	0.106335
2.56471	0.104427
2.56604	0.102997
2.56737	0.102043
2.56871	0.101089
2.57004	0.100136
2.57137	0.0991821
2.57271	0.0977516
2.57404	0.0958443
2.57537	0.0925064
2.57671	0.0896454
2.57804	0.0867844
2.57937	0.084877
2.58071	0.0834465
2.58204	0.0829697
2.58337	0.082016
2.58471	0.0805855
2.58604	0.079155
2.58737	0.0772476
2.58871	0.0748634
2.59004	0.0720024
2.59137	0.0696182
2.59271	0.0667572
2.59404	0.0634193
2.59537	0.0591278
2.59671	0.0538826
2.59804	0.0495911
2.59937	0.0462532
2.60071	0.0429153
2.60204	0.0395775
2.60337	0.0376701
2.60471	0.0362396
2.60604	0.0343323
2.60737	0.0314713
2.60871	0.0276566
2.61004	0.0243187
2.61137	0.020504
2.61271	0.0162125
2.61404	0.0123978
2.61537	0.00905991
2.61671	0.00619888
2.61804	0.0038147
2.61937	0.00190735
2.62071	0.000476837
2.62204	-0.00143051
2.62337	-0.00333786
2.62471	-0.00524521
2.62604	-0.00762939
2.62737	-0.0100136
2.62871	-0.0128746
2.63004	-0.0157356
2.63137	-0.0185966
2.63271	-0.0214577
2.63404	-0.0247955
2.63537	-0.0290871
2.63671	-0.0333786
2.63804	-0.0386238
2.63937	-0.043869
2.64071	-0.0491142
2.64204	-0.0529289
2.64337	-0.0557899
2.64471	-0.0576973
2.64604	-0.058651
2.64737	-0.0591278
2.64871	-0.0596046
2.65004	-0.0600815
2.65137	-0.0596046
2.65271	-0.0591278
2.65404	-0.058651
2.65537	-0.0576973
2.65671	-0.0562668
2.65804	-0.0553131
2.65937	-0.0557899
2.66071	-0.0572205
2.66204	-0.0576973
2.66337	-0.0576973
2.66471	-0.0567436
[truncated: 1,001 more rows]

## Sheet: 1B
rXkr9 caspase-treated
volume [ml]	A280 [mAU]
0	-0.009			full raw gel		lanes shown
0.037	0.006
0.075	-0.003
0.112	-0.002
0.15	0
0.187	-0.004
0.225	-0.009
0.262	-0.027
0.3	0.007
0.337	-0.02
0.375	-0.012
0.412	-0.004
0.45	-0.009
0.487	-0.02
0.525	-0.015
0.562	-0.016
0.6	-0.005
0.637	-0.028
0.675	-0.02
0.712	-0.011
0.75	-0.015
0.787	-0.019
0.825	-0.018
0.862	-0.029
0.9	-0.041
0.937	-0.022
0.975	-0.002
1.012	-0.016
1.05	-0.027
1.087	-0.016
1.125	-0.012
1.162	-0.006
1.2	-0.022
1.237	-0.016
1.275	-0.016
1.312	-0.024
1.35	-0.016
1.387	-0.004
1.425	-0.019
1.462	-0.023
1.499	-0.038
1.537	-0.018
1.574	-0.039
1.612	-0.023
1.649	-0.015
1.687	-0.009
1.724	-0.033
1.762	-0.018
1.799	-0.025
1.837	-0.021
1.874	-0.017
1.912	-0.02
1.949	-0.002
1.987	-0.014
2.024	0.007
2.062	-0.007
2.099	-0.021
2.137	-0.016
2.174	-0.03
2.212	-0.018
2.249	-0.016
2.287	-0.014
2.324	-0.036
2.362	-0.021
2.399	-0.003
2.437	-0.016
2.474	-0.011
2.512	-0.02
2.549	-0.015
2.587	-0.032
2.624	-0.029
2.662	-0.001
2.699	-0.022
2.737	-0.031
2.774	-0.018
2.812	-0.013
2.849	-0.017
2.887	-0.026
2.924	-0.037
2.962	-0.037
2.999	-0.028
3.036	-0.022
3.074	-0.023
3.111	-0.033
3.149	-0.028
3.186	-0.021
3.224	-0.034
3.261	-0.018
3.299	-0.031
3.336	-0.03
3.374	-0.023
3.411	-0.007
3.449	-0.003
3.486	-0.024
3.524	-0.018
3.561	-0.008
3.599	-0.011
3.636	-0.012
3.674	-0.025
3.711	-0.023
3.749	-0.031
3.786	-0.019
3.824	-0.014
3.861	-0.01
3.899	-0.002
3.936	-0.027
3.974	-0.029
4.011	-0.003
4.049	-0.007
4.086	-0.002
4.124	-0.02
4.161	-0.015
4.199	-0.012
4.236	-0.045
4.274	-0.028
4.311	-0.029
4.349	-0.024
4.386	-0.024
4.424	-0.026
4.461	-0.023
4.498	-0.011
4.536	-0.026
4.573	-0.026
4.611	-0.04
4.648	-0.025
4.686	-0.021
4.723	-0.033
4.761	-0.008
4.798	-0.014
4.836	-0.016
4.873	-0.006
4.911	-0.006
4.948	-0.007
4.986	-0.008
5.023	-0.003
5.061	-0.025
5.098	-0.028
5.136	-0.026
5.173	-0.03
5.211	-0.018
5.248	-0.014
5.286	-0.028
5.323	-0.039
5.361	-0.036
5.398	-0.03
5.436	-0.028
5.473	-0.023
5.511	0.008
5.548	-0.007
5.586	-0.002
5.623	-0.017
5.661	-0.038
5.698	-0.028
5.736	-0.033
5.773	-0.042
5.811	-0.029
5.848	-0.028
5.886	-0.028
5.923	-0.011
5.961	-0.005
5.998	0
6.035	-0.022
6.073	-0.019
6.11	-0.023
6.148	-0.039
6.185	-0.017
6.223	-0.021
6.26	-0.038
6.298	-0.023
6.335	-0.021
6.373	-0.02
6.41	-0.02
6.448	-0.009
6.485	-0.012
6.523	-0.027
6.56	-0.005
6.598	-0.016
6.635	-0.025
6.673	-0.016
6.71	-0.017
6.748	-0.026
6.785	-0.013
6.823	-0.007
6.86	-0.02
6.898	-0.028
6.935	-0.028
6.973	0.005
7.01	-0.015
7.048	0.019
7.085	0.024
7.123	0.03
7.16	0.046
7.198	0.052
7.235	0.064
7.273	0.068
7.31	0.073
7.348	0.114
7.385	0.131
7.423	0.161
7.46	0.171
7.497	0.222
7.535	0.237
7.572	0.283
7.61	0.339
7.647	0.418
7.685	0.505
7.722	0.64
7.76	0.872
7.797	1.18
7.835	1.714
7.872	2.348
7.91	3.216
7.947	4.23
7.985	5.358
8.022	6.409
8.06	7.491
8.097	8.445
8.135	9.393
8.172	10.115
8.21	10.722
8.247	11.15
8.285	11.419
8.322	11.549
8.36	11.55
8.397	11.443
8.435	11.228
8.472	11.002
8.51	10.767
8.547	10.549
8.585	10.333
8.622	10.165
8.66	10.051
8.697	9.975
8.735	9.916
8.772	9.866
8.81	9.871
8.847	9.86
8.885	9.866
8.922	9.887
8.96	9.927
8.997	9.961
9.034	9.982
9.072	10.031
9.109	10.108
9.147	10.143
9.184	10.214
9.222	10.28
9.259	10.344
9.297	10.454
9.334	10.537
9.372	10.645
9.409	10.715
9.447	10.841
9.484	10.959
9.522	11.042
9.559	11.146
9.597	11.308
9.634	11.413
9.672	11.535
9.709	11.671
9.747	11.794
9.784	11.963
9.822	12.099
9.859	12.232
9.897	12.396
9.934	12.548
9.972	12.767
10.009	12.886
10.047	13.086
10.084	13.278
10.122	13.479
10.159	13.665
10.197	13.886
10.234	14.086
10.272	14.352
10.309	14.564
10.347	14.82
10.384	15.096
10.422	15.389
10.459	15.671
10.496	15.987
10.534	16.322
10.571	16.689
10.609	17.001
10.646	17.405
10.684	17.78
10.721	18.206
10.759	18.639
10.796	19.19
10.834	19.746
10.871	20.427
10.909	21.102
10.946	21.966
10.984	22.925
11.021	24.066
11.059	25.318
11.096	26.846
11.134	28.479
11.171	30.341
11.209	32.214
11.246	34.437
11.284	36.679
11.321	39.172
11.359	41.52
11.396	44.178
11.434	46.672
11.471	49.18
11.509	51.412
11.546	53.733
11.584	55.693
11.621	57.608
11.659	59.243
11.696	60.818
11.734	62.048
11.771	63.198
11.809	64.158
11.846	65.194
11.884	66.204
11.921	67.37
11.959	68.668
11.996	70.444
12.033	72.541
12.071	75.08
12.108	78.017
12.146	82.071
12.183	86.55
12.221	91.977
12.258	97.772
12.296	105.119
12.333	112.471
12.371	120.529
12.408	128.551
12.446	137.883
12.483	146.764
12.521	155.976
12.558	164.169
12.596	173.016
12.633	180.474
12.671	187.142
12.708	192.196
12.746	196.766
12.783	199.701
12.821	201.254
12.858	201.209
12.896	199.628
12.933	196.887
12.971	192.692
13.008	187.817
13.046	181.298
13.083	174.437
13.121	166.589
13.158	159.142
13.196	150.412
13.233	141.912
13.271	133.435
13.308	126.029
13.346	117.706
13.383	110.038
13.421	102.424
13.458	95.814
13.495	89.041
13.533	82.675
13.57	76.77
13.608	71.867
13.645	66.687
13.683	62.176
13.72	57.572
13.758	53.741
13.795	50.047
13.833	46.439
13.87	43.163
13.908	40.429
13.945	37.587
13.983	35.118
14.02	32.595
14.058	30.424
14.095	28.392
14.133	26.513
14.17	24.751
14.208	23.167
14.245	21.58
14.283	20.28
14.32	18.903
14.358	17.651
14.395	16.523
14.433	15.485
14.47	14.49
14.508	13.596
14.545	12.709
14.583	11.952
14.62	11.18
14.658	10.519
14.695	9.845
14.733	9.284
14.77	8.753
14.808	8.261
14.845	7.785
14.883	7.419
14.92	7.004
14.958	6.692
14.995	6.387
15.032	6.119
15.07	5.898
15.107	5.735
15.145	5.586
15.182	5.443
15.22	5.353
15.257	5.275
15.295	5.188
15.332	5.149
15.37	5.123
15.407	5.1
15.445	5.073
15.482	5.054
15.52	4.996
15.557	4.991
15.595	4.929
15.632	4.854
15.67	4.781
15.707	4.701
15.745	4.637
15.782	4.568
15.82	4.451
15.857	4.402
15.895	4.371
15.932	4.391
15.97	4.503
16.007	4.726
16.045	5.153
16.082	5.79
16.12	6.742
16.157	7.898
16.195	9.316
16.232	10.731
16.27	12.379
16.307	13.893
16.345	15.474
16.382	16.809
16.42	18.059
16.457	18.991
16.494	19.802
16.532	20.361
16.569	20.735
16.607	20.94
16.644	20.94
16.682	20.812
16.719	20.531
16.757	20.175
16.794	19.702
16.832	19.172
16.869	18.598
16.907	17.977
16.944	17.242
16.982	16.579
17.019	15.867
17.057	15.189
17.094	14.425
17.132	13.793
17.169	13.067
17.207	12.438
17.244	11.742
17.282	11.16
17.319	10.552
17.357	9.954
17.394	9.363
17.432	8.882
17.469	8.357
17.507	7.87
17.544	7.359
17.582	6.898
17.619	6.506
17.657	6.09
17.694	5.678
17.732	5.33
17.769	4.978
17.807	4.671
17.844	4.321
17.882	4.039
17.919	3.771
17.957	3.506
17.994	3.239
18.031	3.031
18.069	2.813
18.106	2.627
18.144	2.424
18.181	2.261
18.219	2.083
18.256	1.946
18.294	1.786
18.331	1.664
18.369	1.54
18.406	1.42
18.444	1.317
18.481	1.215
18.519	1.113
18.556	1.026
18.594	0.981
18.631	0.909
18.669	0.833
18.706	0.755
18.744	0.717
18.781	0.649
18.819	0.618
18.856	0.573
18.894	0.557
18.931	0.521
18.969	0.508
19.006	0.476
19.044	0.47
19.081	0.481
19.119	0.508
19.156	0.54
19.194	0.57
19.231	0.624
19.269	0.657
19.306	0.748
19.344	0.805
19.381	0.863
19.419	0.93
19.456	0.983
19.493	1.067
19.531	1.147
19.568	1.221
19.606	1.33
19.643	1.387
19.681	1.466
19.718	1.528
19.756	1.606
19.793	1.69
19.831	1.745
19.868	1.816
19.906	1.895
19.943	1.969
19.981	1.999
20.018	2.024
20.056	2.05
20.093	2.086
20.131	2.087
20.168	2.105
20.206	2.078
20.243	2.093
20.281	2.059
20.318	2.04
20.356	2.013
20.393	1.981
20.431	1.953
20.468	1.936
20.506	1.922
20.543	1.92
20.581	1.865
20.618	1.852
20.656	1.818
20.693	1.801
20.731	1.747
20.768	1.712
20.806	1.648
20.843	1.57
20.881	1.499
20.918	1.444
20.956	1.36
20.993	1.269
21.03	1.178
21.068	1.107
21.105	1.021
21.143	0.945
21.18	0.876
21.218	0.816
21.255	0.758
21.293	0.685
21.33	0.637
21.368	0.579
21.405	0.537
21.443	0.471
21.48	0.462
21.518	0.421
21.555	0.381
21.593	0.361
21.63	0.326
21.668	0.324
21.705	0.276
21.743	0.291
21.78	0.277
21.818	0.259
21.855	0.254
21.893	0.263
21.93	0.262
21.968	0.27
22.005	0.289
22.043	0.299
22.08	0.307
22.118	0.335
22.155	0.356
22.193	0.366
22.23	0.411
22.268	0.422
22.305	0.443
22.343	0.434
22.38	0.465
22.418	0.478
22.455	0.455
22.492	0.468
22.53	0.455
22.567	0.459
22.605	0.464
22.642	0.436
22.68	0.42
22.717	0.408
22.755	0.402
22.792	0.377
22.83	0.353
22.867	0.358
22.905	0.31
22.942	0.287
22.98	0.281
23.017	0.255
23.055	0.235
23.092	0.204
23.13	0.199
23.167	0.201
23.205	0.178
23.242	0.161
23.28	0.155
23.317	0.131
23.355	0.125
23.392	0.119
23.43	0.116
23.467	0.09
23.505	0.091
23.542	0.11
23.58	0.076
23.617	0.055
23.655	0.076
23.692	0.073
23.73	0.062
23.767	0.048
23.805	0.05
23.842	0.033
23.88	0.052
23.917	0.048
23.955	0.035
23.992	0.036
24.029	0.034
24.067	0.05
24.104	0.027
24.142	0.038
24.179	0.031
24.217	0.024
24.254	0.029
24.292	0.025
24.329	0.015
24.367	0.015
24.404	0.009
24.442	0.022
24.479	0.028
24.517	0.011
24.554	0.024
24.592	0.011
24.629	0.011
24.667	0.01
24.704	0.023
24.742	0.013
24.779	0.011
24.817	0.01
24.854	0.017
24.892	0.029
24.929	0.041
24.967	0.018
25.004	-0.006
25.042	0.03
25.079	0.016
25.117	0.014
25.154	0.009
25.192	0.006
25.229	0.019
25.267	0.003
25.304	0.019
25.342	0.016
25.379	0.021
25.417	0.009
25.454	0.021
25.491	0.016
25.529	0.01
25.566	0.023
25.604	0.034
25.641	0.037
25.679	0.036
25.716	0.035
25.754	0.032
25.791	0.021
25.829	0.009
25.866	0.023
25.904	0.028
25.941	0.015
25.979	0.012
26.016	0.035
26.054	0.025
26.091	0.015
26.129	0.004
26.166	0.016
26.204	0
26.241	0.004
26.279	0.009
26.316	0.028
26.354	0.011
26.391	0.016
26.429	0.025
26.466	0.018
26.504	-0.001
26.541	0.023
26.579	0.019
26.616	0.022
26.654	0.024
26.691	0.015
26.729	0.026
26.766	0.048
26.804	0.046
26.841	0.026
26.879	0.042
26.916	0.055
26.954	0.072
26.991	0.084
27.028	0.067
27.066	0.063
27.103	0.074
27.141	0.063
27.178	0.085
27.216	0.074
27.253	0.074
27.291	0.07
27.328	0.081
27.366	0.078
27.403	0.086
27.441	0.072
27.478	0.074
27.516	0.075
27.553	0.065
27.591	0.05
27.628	0.058
27.666	0.028
27.703	0.035
27.741	0.059
27.778	0.029
27.816	0.017
27.853	0.039
27.891	0.035
27.928	0.02
27.966	0.021
28.003	0.031
28.041	0.02
28.078	0.007
28.116	-0.001
28.153	0
28.191	-0.008
28.228	-0.021
28.266	-0.001
28.303	0.002
28.341	-0.006
28.378	0.018
28.416	0.004
28.453	0.006
28.49	0.001
28.528	-0.003
28.565	-0.017
28.603	0.007
28.64	0.002
28.678	-0.003
28.715	-0.004
28.753	0
28.79	-0.015
28.828	-0.025
28.865	-0.038
28.903	-0.013
28.94	-0.032
28.978	-0.034
29.015	-0.026
29.053	-0.017
29.09	-0.045
29.128	-0.024
29.165	-0.024
29.203	-0.032
29.24	-0.029
29.278	-0.017
29.315	-0.009
29.353	-0.025
29.39	-0.022
29.428	-0.022
29.465	-0.03
29.503	-0.039
29.54	-0.013
29.578	-0.03
29.615	-0.012
29.653	-0.018
29.69	-0.038
29.728	-0.03
29.765	-0.018
29.803	-0.015
29.84	-0.021
29.878	-0.013
29.915	-0.022
29.953	-0.016
29.99	-0.014
30.027	-0.023
30.065	-0.02
30.102	-0.025
30.14	-0.015
30.177	-0.03
30.215	-0.008
30.252	-0.021
30.29	-0.013
30.327	-0.021
30.365	-0.022
30.402	-0.005
30.44	-0.014
30.477	-0.041
30.515	-0.013
30.552	-0.018
30.59	-0.023
30.627	-0.016
30.665	-0.027
30.702	-0.003
30.74	-0.019
30.777	-0.01
30.815	-0.035
30.852	-0.016
30.89	-0.029
30.927	-0.018
30.965	-0.032
31.002	-0.022
31.04	-0.012
31.077	-0.01
31.115	-0.026
31.152	-0.01
31.19	-0.012
31.227	-0.017
31.265	-0.021
31.302	-0.021
31.34	-0.023
31.377	-0.023
31.415	-0.037
31.452	-0.018
31.489	-0.029
31.527	-0.027
31.564	-0.035
31.602	-0.026
31.639	-0.033
31.677	-0.024
31.714	-0.037
31.752	-0.026
31.789	-0.044
31.827	-0.05
31.864	-0.021
31.902	-0.041
31.939	-0.025
31.977	-0.028
32.014	-0.048
32.052	-0.018
32.089	-0.049
32.127	-0.046
32.164	-0.041
32.202	-0.047
32.239	-0.039
32.277	-0.046
32.314	-0.04
32.352	-0.035
32.389	-0.04
32.427	-0.061
32.464	-0.048
32.502	-0.061
32.539	-0.039
32.577	-0.025
32.614	-0.047
32.652	-0.04
32.689	-0.024
32.727	-0.044
32.764	-0.042
32.802	-0.036
32.839	-0.038
32.877	-0.062
32.914	-0.041
32.952	-0.05
32.989	-0.038
33.026	-0.058
33.064	-0.027
33.101	-0.046
33.139	-0.053
33.176	-0.045
33.214	-0.037
33.251	-0.03
33.289	-0.037
33.326	-0.048
33.364	-0.041
33.401	-0.029
33.439	-0.033
33.476	-0.033
33.514	-0.052
33.551	-0.041
33.589	-0.039
33.626	-0.032
33.664	-0.047
33.701	-0.062
33.739	-0.05
33.776	-0.034
33.814	-0.048
33.851	-0.063
33.889	-0.046
33.926	-0.039
33.964	-0.06

## Sheet: 1C
		full raw gel		lanes shown

## Sheet: 1D
rXKR9 uncleaved													rXKR9 uncleaved TCEP													rXKR9 cleaved lip.													rXKR9 cleaved buf.
	Measurement 1			Measurement 2			Measurement 3			Average	Std.Dev			Measurement 1			Measurement 2			Measurement 3			Average	Std.Dev			Measurement 1			Measurement 2			Measurement 3			Average	Std.Dev			Measurement 1			Measurement 2			Measurement 3			Average
time [s]	F	Fmax	F/Fmax	F	Fmax	F/Fmax	F	Fmax	F/Fmax	F/Fmax			time [s]	F	Fmax	F/Fmax	F	Fmax	F/Fmax	F	Fmax	F/Fmax	F/Fmax			time [s]	F	Fmax	F/Fmax	F	Fmax	F/Fmax	F	Fmax	F/Fmax	F/Fmax			time [s]	F	Fmax	F/Fmax	F	Fmax	F/Fmax	F	Fmax	F/Fmax	F/Fmax
0	2563000	2542452	1.00808	2530530	2.52262e+06	1.00314	2511390	2.49085e+06	1.00825	1.00649	0.00290358		0	2009860	1996477	1.0067	2074340	2.05103e+06	1.01137	2031340	2011821	1.0097	1.00926	0.0023631		0	1644550	1.62908e+06	1.0095	1633320	1618581	1.00911	1634890	1.62244e+06	1.00767	1.08799e+06	0.000961844		0	2800180	2777081	1.00832	2773150	2.75066e+06	1.00818	2699990	2.68281e+06	1.0064	2.18835e+06
3	2554700		1.00482	2539280		1.00661	2507840		1.00682	1.00608	0.00109958		3	2010340		1.00694	2068890		1.00871	2045900		1.01694	1.01086	0.00533491		3	1637890		1.00541	1621670		1.00191	1648290		1.01593	824146	0.00729772		3	2785790		1.00314	2778610		1.01016	2706450		1.00881	1.7653e+06
6	2555320		1.00506	2522070		0.999783	2513690		1.00917	1.00467	0.00470515		6	2005390		1.00446	2067570		1.00807	2024870		1.00649	1.00634	0.00180508		6	1644390		1.0094	1636070		1.01081	1645140		1.01399	822571	0.00235117		6	2797620		1.0074	2760050		1.00342	2692140		1.00348	1.75736e+06
9	2549900		1.00293	2545220		1.00896	2506340		1.00622	1.00604	0.00301937		9	2006410		1.00498	2064670		1.00665	2016740		1.00245	1.00469	0.00211764		9	1629500		1.00026	1617950		0.99961	1634830		1.00763	817416	0.00445691		9	2791670		1.00525	2766140		1.00563	2691750		1.00333	1.75458e+06
12	2556790		1.00564	2523850		1.00049	2508530		1.0071	1.00441	0.0034721		12	2005070		1.0043	2062660		1.00567	2020980		1.00455	1.00484	0.000728444		12	1631830		1.00169	1631680		1.00809	1637230		1.00911	818616	0.00402391		12	2791970		1.00536	2759100		1.00307	2701030		1.00679	1.75982e+06
15	2554650		1.0048	2535020		1.00492	2500210		1.00376	1.00449	0.000637843		15	1997680		1.0006	2053530		1.00122	2015330		1.00174	1.00119	0.000571452		15	1634340		1.00323	1629840		1.00696	1623240		1.00049	811621	0.00324539		15	2793710		1.00599	2762580		1.00434	2691510		1.00324	1.75157e+06
18	2543820		1.00054	2527950		1.00211	2493130		1.00091	1.00119	0.0008229		18	2003650		1.00359	2060970		1.00485	2014810		1.00149	1.00331	0.00169884		18	1638940		1.00605	1630300		1.00724	1634830		1.00763	817416	0.000822384		18	2792160		1.00543	2756610		1.00216	2700210		1.00648	1.75881e+06
21	2549520		1.00278	2534040		1.00453	2494000		1.00126	1.00286	0.00163338		21	2003150		1.00334	2056160		1.0025	2014690		1.00143	1.00242	0.000960584		21	1628630		0.999725	1621550		1.00183	1624330		1.00116	812166	0.00107736		21	2787240		1.00366	2750000		0.999762	2684960		1.0008	1.74856e+06
24	2543320		1.00034	2532800		1.00404	2487530		0.998667	1.00101	0.00274758		24	2000930		1.00223	2054410		1.00165	2004900		0.99656	1.00015	0.00311969		24	1623910		0.996828	1618070		0.999684	1622360		0.999948	811181	0.00173023		24	2778210		1.00041	2751250		1.00022	2680940		0.999302	1.74606e+06
27	2531300		0.995614	2524910		1.00091	2498220		1.00296	0.999827	0.00378991		27	2002450		1.00299	2055920		1.00239	2008520		0.998359	1.00125	0.00251789		27	1629750		1.00041	1616020		0.998418	1622690		1.00015	811346	0.00108427		27	2783550		1.00233	2757440		1.00247	2684800		1.00074	1.74807e+06
30	2536520		0.997667	2512760		0.996092	2492020		1.00047	0.998076	0.0022169		30	1996630		1.00008	2045240		0.997178	2006090		0.997151	0.998135	0.00168121		30	1627700		0.999154	1619330		1.00046	1618110		0.997328	809055	0.00157428		30	2772960		0.998516	2747850		0.99898	2688240		1.00202	1.74865e+06
33	2530490		0.995295	2515490		0.997175	2492470		1.00065	0.997706	0.00271668		33	1995180		0.99935	2049260		0.999138	2010550		0.999368	0.999286	0.000127941		33	1627480		0.999019	1612380		0.996169	1621590		0.999473	810795	0.00179123		33	2766860		0.99632	2750160		0.99982	2673920		0.996685	1.74236e+06
36	2535980		0.997454	2513360		0.99633	2481660		0.99631	0.996698	0.000655012		36	1987530		0.995519	2039920		0.994584	2006870		0.997539	0.995881	0.00151023		36	1628660		0.999744	1608050		0.993494	1620630		0.998882	810315	0.00338713		36	2773310		0.998642	2745550		0.998144	2688220		1.00202	1.74927e+06
39	2537660		0.998115	2526540		1.00155	2480700		0.995924	0.998532	0.00283822		39	1988700		0.996105	2038310		0.993799	2007330		0.997768	0.995891	0.00199276		39	1616340		0.992181	1611610		0.995693	1622490		1.00003	811245	0.00393063		39	2766620		0.996233	2749350		0.999525	2673540		0.996544	1.74239e+06
42	2535250		0.997167	2519180		0.998637	2473780		0.993146	0.996317	0.00284255		42	1990150		0.996831	2038310		0.993799	2005180		0.996699	0.995776	0.00171341		42	1629280		1.00012	1611780		0.995798	1611400		0.993193	805700	0.00350122		42	2763130		0.994976	2727560		0.991604	2659870		0.991448	1.73279e+06
45	2533640		0.996534	2512420		0.995958	2473770		0.993142	0.995211	0.00181485		45	1988250		0.995879	2033510		0.991459	2002240		0.995238	0.994192	0.00238837		45	1620180		0.994538	1609380		0.994315	1611480		0.993242	805740	0.000693105		45	2756750		0.992679	2739070		0.995788	2681960		0.999682	1.74385e+06
48	2539660		0.998902	2507920		0.994174	2478760		0.995146	0.996074	0.00249697		48	1980450		0.991972	2034300		0.991844	1992360		0.990327	0.991381	0.000915419		48	1619110		0.993882	1609520		0.994402	1607130		0.990561	803565	0.00208371		48	2761130		0.994256	2743390		0.997359	2668040		0.994494	1.7358e+06
51	2533540		0.996495	2513380		0.996338	2476830		0.994371	0.995735	0.00118363		51	1987410		0.995459	2043050		0.99611	1996250		0.99226	0.99461	0.00206067		51	1621050		0.995072	1607920		0.993413	1608590		0.991461	804295	0.00180781		51	2766550		0.996208	2733810		0.993876	2667520		0.9943	1.73591e+06
54	2534800		0.99699	2510170		0.995066	2468080		0.990858	0.994305	0.00313621		54	1987150		0.995328	2030720		0.990099	2010400		0.999294	0.994907	0.00461186		54	1616510		0.992286	1613050		0.996583	1600560		0.986511	800280	0.00505372		54	2760490		0.994026	2731170		0.992916	2659380		0.991266	1.72983e+06
57	2529180		0.99478	2505460		0.993199	2478080		0.994873	0.994284	0.000940902		57	1983160		0.99333	2048810		0.998919	2001070		0.994656	0.995635	0.00292028		57	1631510		1.00149	1612130		0.996014	1599080		0.985599	799540	0.00807374		57	2751720		0.990868	2730270		0.992589	2661780		0.99216	1.73066e+06
60	2273300		0.894137	2151900		0.853043	2193700		0.880703	0.875961	0.0209536		60	1765480		0.884298	1758220		0.857239	1743330		0.866543	0.86936	0.0137477		60	1437930		0.882665	1457080		0.900221	1379140		0.850038	689570	0.0254656		60	2462970		0.886892	2402510		0.873432	2302060		0.858077	1.49582e+06
63	1944990		0.765006	1884440		0.747018	1895440		0.760961	0.757661	0.0094369		63	1487630		0.745128	1522840		0.742477	1508890		0.750012	0.745872	0.00382248		63	1215070		0.745864	1238740		0.765325	1201810		0.74074	600905	0.0129703		63	2125660		0.76543	2069210		0.752261	2034110		0.758201	1.31751e+06
66	1729380		0.680202	1691370		0.670482	1712320		0.687444	0.679376	0.00851084		66	1337980		0.670171	1365510		0.665769	1349040		0.670557	0.668832	0.00265985		66	1083970		0.665389	1103560		0.681807	1071820		0.66062	535910	0.0111143		66	1879290		0.676714	1845760		0.671026	1807410		0.6737	1.17166e+06
69	1588480		0.624783	1545250		0.612558	1568260		0.629608	0.622316	0.00878842		69	1219810		0.610981	1262250		0.615423	1228600		0.610691	0.612365	0.0026525		69	985640		0.60503	1003700		0.620111	982750		0.605722	491375	0.00851453		69	1711130		0.616161	1672960		0.608204	1637850		0.610497	1.06461e+06
72	1479880		0.582068	1453500		0.576187	1460480		0.586338	0.581531	0.00509647		72	1132320		0.567159	1167260		0.56911	1152340		0.572785	0.569684	0.00285644		72	919950		0.564706	929730		0.574411	907780		0.559514	453890	0.00756143		72	1571040		0.565716	1548300		0.562884	1506880		0.561679	980385
75	1398970		0.550244	1360480		0.539313	1387890		0.557195	0.548917	0.00901463		75	1074000		0.537948	1109460		0.540929	1085370		0.539496	0.539458	0.00149102		75	864110		0.530429	884170		0.546262	857510		0.52853	428755	0.00973616		75	1475560		0.531335	1453350		0.528365	1430450		0.53319	929603
78	1339660		0.526917	1306010		0.51772	1319470		0.529726	0.524788	0.00627986		78	1029430		0.515623	1056240		0.514981	1038030		0.515965	0.515523	0.000499813		78	822810		0.505077	837160		0.517218	811650		0.500264	405825	0.00873734		78	1411220		0.508167	1380090		0.501731	1360380		0.507072	883103
81	1298750		0.510826	1267320		0.502383	1280290		0.513997	0.509069	0.00600308		81	993220		0.497486	1025780		0.50013	994950		0.494552	0.497389	0.00279019		81	793260		0.486938	799060		0.493679	781420		0.481631	390710	0.00603825		81	1348220		0.485481	1327280		0.482532	1297500		0.483634	844105
84	1273380		0.500847	1234930		0.489543	1239980		0.497814	0.496068	0.00585075		84	967010		0.484358	984510		0.480008	975960		0.485113	0.48316	0.00275525		84	774570		0.475465	778090		0.480724	761450		0.469323	380725	0.00570615		84	1304910		0.469885	1287670		0.468132	1252170		0.466738	816448
87	1242820		0.488827	1210330		0.479791	1215210		0.487869	0.485496	0.00496355		87	942750		0.472207	974650		0.475201	954170		0.474282	0.473896	0.00153376		87	756410		0.464318	757640		0.468089	741500		0.457026	370750	0.00562389		87	1272690		0.458283	1255100		0.456291	1226760		0.457266	798755
90	1214360		0.477633	1196330		0.474242	1191340		0.478286	0.47672	0.00217143		90	929020		0.46533	951730		0.464026	938160		0.466324	0.465226	0.00115239		90	743180		0.456197	744430		0.459928	723880		0.446166	361940	0.00711693		90	1250400		0.450257	1230590		0.447381	1202530		0.448235	782235
93	1197760		0.471104	1189590		0.47157	1178450		0.473111	0.471928	0.0010505		93	918470		0.460045	947830		0.462124	924740		0.459653	0.460608	0.00132813		93	733110		0.450015	732560		0.452594	720110		0.443843	360055	0.00449701		93	1225100		0.441147	1208800		0.439459	1180410		0.43999	770233
96	1184640		0.465944	1169950		0.463784	1163170		0.466977	0.465568	0.00162916		96	908780		0.455192	932220		0.454514	916510		0.455562	0.455089	0.000531838		96	732730		0.449782	727410		0.449412	708880		0.436921	354440	0.00732095		96	1206050		0.434287	1194060		0.4341	1169720		0.436005	762080
99	1176650		0.462801	1156700		0.458532	1158760		0.465206	0.46218	0.00338048		99	897160		0.449372	924540		0.450769	910630		0.45264	0.450927	0.00163974		99	714210		0.438414	713350		0.440726	696960		0.429574	348480	0.00588561		99	1198070		0.431413	1191780		0.433271	1152800		0.429698	750640
102	1166840		0.458943	1155860		0.458199	1144040		0.459297	0.458813	0.000560469		102	891190		0.446381	924730		0.450862	904190		0.449439	0.448894	0.00228939		102	708480		0.434896	708530		0.437748	692730		0.426967	346365	0.00558619		102	1186870		0.42738	1177200		0.427971	1154200		0.43022	750283
105	1159910		0.456217	1147660		0.454948	1141640		0.458333	0.456499	0.00171015		105	885090		0.443326	914900		0.446069	896700		0.445716	0.445037	0.00149224		105	703310		0.431723	705740		0.436024	687330		0.423639	343665	0.00628825		105	1179470		0.424716	1163570		0.423016	1141590		0.42552	742628
108	1157060		0.455096	1140480		0.452102	1141470		0.458265	0.455154	0.00308198		108	888840		0.445204	904490		0.440994	895140		0.44494	0.443713	0.00235848		108	702650		0.431318	698180		0.431353	690880		0.425827	345440	0.00318058		108	1177800		0.424114	1162720		0.422707	1144580		0.426634	745010
111	1149440		0.452099	1129800		0.447868	1131680		0.454335	0.451434	0.00328413		111	873940		0.437741	899230		0.438429	884820		0.439811	0.43866	0.0010539		111	697010		0.427856	698990		0.431854	679170		0.418609	339585	0.00679337		111	1167960		0.420571	1155380		0.420038	1132350		0.422076	735968
114	1144510		0.45016	1128060		0.447178	1122730		0.450741	0.44936	0.00191151		114	879600		0.440576	900830		0.439209	887960		0.441371	0.440385	0.0010936		114	689810		0.423436	690580		0.426658	679830		0.419016	339915	0.00383653		114	1159810		0.417636	1150890		0.418406	1123610		0.418818	731763
117	1147490		0.451332	1127390		0.446913	1114810		0.447562	0.448602	0.00238626		117	866400		0.433964	896890		0.437288	879720		0.437275	0.436176	0.0019153		117	693030		0.425413	690800		0.426794	673940		0.415386	336970	0.00622617		117	1153170		0.415245	1147660		0.417231	1123590		0.41881	730280
120	1136040		0.446828	1121140		0.444435	1115670		0.447907	0.44639	0.00177694		120	875070		0.438307	900230		0.438917	876960		0.435904	0.437709	0.00159303		120	691410		0.424418	686650		0.42423	673150		0.414899	336575	0.00544248		120	1154450		0.415706	1145290		0.41637	1114400		0.415385	725488
123	1130460		0.444634	1120590		0.444217	1110630		0.445884	0.444912	0.000867278		123	866330		0.433929	888370		0.433134	876000		0.435426	0.434163	0.00116391		123	686980		0.421699	687760		0.424915	670100		0.413019	335050	0.00615386		123	1146190		0.412732	1140180		0.414512	1113870		0.415187	724460
126	1126180		0.44295	1117210		0.442877	1104090		0.443258	0.443029	0.000202076		126	868410		0.434971	885880		0.43192	875190		0.435024	0.433972	0.00177693		126	686180		0.421208	686950		0.424415	668790		0.412211	334395	0.00632653		126	1144740		0.41221	1135620		0.412854	1117290		0.416462	725843
129	1132460		0.44542	1109960		0.440003	1103980		0.443214	0.442879	0.00272402		129	866230		0.433879	885010		0.431496	867380		0.431142	0.432172	0.00148885		129	685970		0.421079	688530		0.425391	664110		0.409327	332055	0.00831433		129	1148600		0.4136	1131220		0.411255	1110940		0.414095	721498
132	1121270		0.441019	1107560		0.439052	1103500		0.443021	0.441031	0.00198467		132	861710		0.431615	882240		0.430145	868370		0.431634	0.431131	0.000854056		132	682090		0.418697	681070		0.420782	662630		0.408415	331315	0.0066211		132	1141250		0.410953	1130930		0.411149	1112790		0.414785	722053
135	1121220		0.440999	1098440		0.435437	1103710		0.443106	0.439847	0.00396217		135	857300		0.429406	880440		0.429268	864930		0.429924	0.429533	0.000345836		135	677590		0.415935	672500		0.415487	660270		0.40696	330135	0.0050574		135	1137180		0.409488	1119870		0.407128	1101520		0.410584	715828
138	1118120		0.43978	1099320		0.435785	1096420		0.440179	0.438581	0.00242962		138	853470		0.427488	881700		0.429882	865420		0.430167	0.429179	0.00147154		138	677430		0.415837	673740		0.416253	661010		0.407416	330505	0.00498628		138	1137490		0.409599	1124010		0.408634	1100820		0.410323	715663
141	1113770		0.438069	1098250		0.435361	1092270		0.438513	0.437314	0.00170592		141	851280		0.426391	873390		0.42583	854970		0.424973	0.425732	0.000714099		141	683370		0.419483	674490		0.416717	659330		0.406381	329665	0.00690598		141	1134100		0.408378	1119730		0.407078	1102070		0.410789	715868
144	1117870		0.439682	1095870		0.434418	1095320		0.439737	0.437946	0.00305528		144	854780		0.428144	874030		0.426143	858930		0.426942	0.427076	0.00100759		144	682000		0.418642	671020		0.414573	660140		0.40688	330070	0.00597333		144	1135790		0.408987	1124930		0.408968	1098170		0.409335	714120
147	1102090		0.433475	1098770		0.435567	1085760		0.435899	0.434981	0.00131418		147	848010		0.424753	879530		0.428824	856290		0.425629	0.426402	0.00214267		147	674380		0.413964	667970		0.412689	652560		0.402208	326280	0.00645093		147	1129880		0.406859	1119080		0.406841	1093230		0.407494	709755
150	1104690		0.434498	1093060		0.433304	1084490		0.435389	0.434397	0.00104633		150	847620		0.424558	875650		0.426932	849120		0.422065	0.424519	0.00243372		150	675150		0.414437	673250		0.415951	656820		0.404834	328410	0.00602923		150	1126610		0.405681	1118360		0.406579	1091300		0.406775	709855
153	1108440		0.435973	1088310		0.431421	1081910		0.434353	0.433916	0.0023073		153	847900		0.424698	865420		0.421945	848580		0.421797	0.422813	0.00163402		153	672490		0.412804	669260		0.413486	652400		0.402109	326200	0.00638052		153	1128930		0.406517	1118850		0.406758	1093240		0.407498	709720
156	1100900		0.433007	1085550		0.430327	1075930		0.431953	0.431762	0.00135029		156	846210		0.423852	867570		0.422993	850440		0.422722	0.423189	0.000589948		156	668400		0.410294	663760		0.410088	655260		0.403872	327630	0.00364945		156	1116440		0.402019	1114220		0.405074	1089440		0.406081	708535
159	1100460		0.432834	1083810		0.429637	1081570		0.434217	0.432229	0.00234907		159	849060		0.425279	865650		0.422057	855310		0.425142	0.424159	0.0018222		159	672150		0.412595	665550		0.411194	652620		0.402245	326310	0.00561513		159	1123420		0.404533	1109050		0.403195	1084400		0.404203	705355
162	1098200		0.431945	1081360		0.428666	1078550		0.433005	0.431205	0.00226202		162	840290		0.420886	867950		0.423178	853410		0.424198	0.422754	0.00169593		162	667000		0.409434	662380		0.409235	648480		0.399693	324240	0.00556736		162	1116360		0.40199	1111430		0.40406	1088210		0.405623	706225
165	1097710		0.431752	1085810		0.43043	1073350		0.430917	0.431033	0.000668911		165	841680		0.421583	862010		0.420282	850810		0.422905	0.42159	0.00131171		165	666010		0.408826	661500		0.408691	649170		0.400118	324585	0.00498901		165	1109710		0.399596	1105440		0.401882	1085080		0.404456	704833
168	1103040		0.433849	1076600		0.426779	1072780		0.430688	0.430439	0.00354158		168	840240		0.420861	862980		0.420755	846860		0.420942	0.420853	9.38236e-05		168	662590		0.406727	660240		0.407913	646020		0.398177	323010	0.00531193		168	1114380		0.401277	1109740		0.403446	1078040		0.401832	700525
171	1092390		0.42966	1077340		0.427072	1071300		0.430094	0.428942	0.00163375		171	835210		0.418342	853880		0.416318	847250		0.421136	0.418599	0.0024191		171	663330		0.407181	658220		0.406665	642860		0.396229	321430	0.00617949		171	1110970		0.40005	1095920		0.398421	1081930		0.403282	701680
174	1095490		0.430879	1078870		0.427679	1069800		0.429492	0.42935	0.00160497		174	837350		0.419414	861500		0.420033	841090		0.418074	0.419174	0.00100152		174	658040		0.403934	660370		0.407993	644060		0.396969	322030	0.00557562		174	1109150		0.399394	1103820		0.401293	1085340		0.404553	703685
177	1089710		0.428606	1076090		0.426577	1067080		0.4284	0.427861	0.00111678		177	832780		0.417125	860180		0.41939	840190		0.417627	0.418047	0.00118961		177	666980		0.409422	657000		0.405911	642550		0.396038	321275	0.0069393		177	1104790		0.397824	1098520		0.399367	1083940		0.404031	702608
180	1093480		0.430089	1077940		0.42731	1065070		0.427593	0.428331	0.0015292		180	835680		0.418577	855680		0.417196	840950		0.418004	0.417926	0.000694118		180	658650		0.404309	656400		0.40554	640150		0.394559	320075	0.00601616		180	1113280		0.400881	1097580		0.399025	1074350		0.400457	697213
183	1079520		0.424598	1064580		0.422014	1064110		0.427207	0.424606	0.00259665		183	830230		0.415848	852140		0.41547	835390		0.415241	0.415519	0.000306416		183	654950		0.402037	653480		0.403736	639460		0.394134	319730	0.00512456		183	1104820		0.397835	1100550		0.400105	1072410		0.399733	696070
186	1081790		0.425491	1071260		0.424662	1057960		0.424738	0.424964	0.000458064		186	831620		0.416544	853070		0.415923	840970		0.418014	0.416827	0.00107396		186	655260		0.402228	655840		0.405194	638430		0.393499	319215	0.00607976		186	1098130		0.395426	1091730		0.396898	1076810		0.401374	698013
189	1081560		0.4254	1068360		0.423512	1059230		0.425248	0.42472	0.00104879		189	826670		0.414064	849950		0.414402	828930		0.41203	0.413499	0.00128335		189	654340		0.401663	650710		0.402025	638010		0.39324	319005	0.00497081		189	1100330		0.396218	1089040		0.39592	1074470		0.400501	696738
192	1074870		0.422769	1067840		0.423306	1058790		0.425072	0.423716	0.00120456		192	823450		0.412452	844950		0.411964	835300		0.415196	0.413204	0.0017423		192	652000		0.400227	645360		0.39872	635980		0.391989	317990	0.00438626		192	1098340		0.395502	1091880		0.396953	1065470		0.397147	691730
195	1079780		0.4247	1060010		0.420202	1052130		0.422398	0.422433	0.00224912		195	826410		0.413934	848510		0.4137	833030		0.414068	0.413901	0.000186128		195	649090		0.39844	655710		0.405114	631030		0.388938	315515	0.00812926		195	1092950		0.393561	1090320		0.396386	1073410		0.400106	694463
198	1067590		0.419906	1061310		0.420718	1047480		0.420531	0.420385	0.000425311		198	824620		0.413038	846650		0.412793	834930		0.415012	0.413614	0.00121671		198	652980		0.400828	650130		0.401667	637890		0.393166	318945	0.00468458		198	1102970		0.397169	1093260		0.397454	1064000		0.396599	691473
201	1071300		0.421365	1056460		0.418795	1054480		0.423341	0.421167	0.00227945		201	819210		0.410328	847540		0.413227	831560		0.413337	0.412297	0.0017065		201	650060		0.399036	646300		0.3993	630260		0.388463	315130	0.00618184		201	1096930		0.394994	1092950		0.397342	1065320		0.397091	690225
204	1068890		0.420417	1063870		0.421733	1041710		0.418214	0.420121	0.00177762		204	826010		0.413734	843010		0.411018	833700		0.414401	0.413051	0.00179156		204	646820		0.397047	646110		0.399183	631930		0.389493	315965	0.00509142		204	1099790		0.396024	1084710		0.394346	1068390		0.398235	692178
207	1067490		0.419866	1056780		0.418922	1057070		0.424381	0.421056	0.00291759		207	823120		0.412286	840820		0.409951	827890		0.411513	0.41125	0.00118979		207	648130		0.397851	642050		0.396675	630400		0.38855	315200	0.00506488		207	1100140		0.39615	1080360		0.392765	1053550		0.392704	684375
210	1072950		0.422014	1055840		0.418549	1048280		0.420852	0.420472	0.00176327		210	817860		0.409652	842220		0.410633	829950		0.412537	0.410941	0.00146689		210	647790		0.397642	645300		0.398683	629230		0.387828	314615	0.00598898		210	1094360		0.394068	1085780		0.394735	1063970		0.396588	689293
213	1069170		0.420527	1052510		0.417229	1044690		0.419411	0.419056	0.00167732		213	818220		0.409832	844800		0.411891	822400		0.408784	0.410169	0.0015808		213	650280		0.399171	644600		0.39825	628130		0.38715	314065	0.00669003		213	1095710		0.394555	1082850		0.39367	1058120		0.394407	686093
216	1065330		0.419017	1048480		0.415632	1040920		0.417897	0.417515	0.00172452		216	818400		0.409922	837060		0.408117	825630		0.410389	0.409476	0.00119981		216	644750		0.395776	638670		0.394586	626430		0.386103	313215	0.00527523		216	1081550		0.389456	1077880		0.391863	1050640		0.391619	681928
219	1064740		0.418785	1053180		0.417495	1041280		0.418042	0.418107	0.000647368		219	816140		0.40879	841780		0.410419	823540		0.409351	0.40952	0.000827382		219	641350		0.393689	644390		0.39812	626310		0.386029	313155	0.0061173		219	1085240		0.390784	1079730		0.392536	1062480		0.396032	687818
222	1057380		0.41589	1048040		0.415457	1044760		0.419439	0.416929	0.00218462		222	814080		0.407758	833730		0.406494	821090		0.408133	0.407462	0.000858787		222	640770		0.393333	640570		0.39576	626690		0.386263	313345	0.00493423		222	1087130		0.391465	1081450		0.393161	1061170		0.395544	687258
225	1061980		0.417699	1045130		0.414304	1046400		0.420097	0.417367	0.00291102		225	817640		0.409541	839530		0.409322	825960		0.410553	0.409806	0.000656973		225	643880		0.395242	641940		0.396607	629230		0.387828	314615	0.00472377		225	1084700		0.39059	1075340		0.39094	1057240		0.394079	685928
228	1051720		0.413664	1046830		0.414978	1032120		0.414364	0.414335	0.000657501		228	815320		0.408379	833410		0.406338	821070		0.408123	0.407613	0.00111205		228	641220		0.393609	638630		0.394562	626320		0.386035	313160	0.00467239		228	1085580		0.390907	1078550		0.392107	1055010		0.393248	684085
231	1055750		0.415249	1040400		0.412429	1037860		0.416669	0.414782	0.00215818		231	815490		0.408465	831290		0.405304	818070		0.406632	0.4068	0.00158689		231	647240		0.397305	642480		0.39694	622720		0.383816	311360	0.0076847		231	1089040		0.392153	1073250		0.39018	1052330		0.392249	681845
234	1058950		0.416507	1045330		0.414383	1031800		0.414236	0.415042	0.00127109		234	815920		0.40868	835270		0.407245	816030		0.405618	0.407181	0.00153215		234	643510		0.395015	638020		0.394185	621800		0.383249	310900	0.00656665		234	1078360		0.388307	1068970		0.388624	1055770		0.393531	683335
237	1054840		0.414891	1046570		0.414875	1027340		0.412445	0.41407	0.00140727		237	807760		0.404593	826420		0.40293	815880		0.405543	0.404355	0.00132274		237	642810		0.394585	634380		0.391936	625580		0.385579	312790	0.00462876		237	1086090		0.391091	1073860		0.390401	1052970		0.392487	682880
240	1054610		0.4148	1041990		0.413059	1032770		0.414625	0.414162	0.000958806		240	812060		0.406746	832300		0.405797	822980		0.409072	0.407205	0.00168525		240	637220		0.391154	634480		0.391998	617580		0.380648	308790	0.00632334		240	1083910		0.390306	1067530		0.3881	1048840		0.390948	678815
243	1055110		0.414997	1041760		0.412968	1030700		0.413794	0.41392	0.00102037		243	811400		0.406416	824080		0.401789	815940		0.405573	0.404593	0.00246438		243	635450		0.390067	635980		0.392924	621740		0.383212	310870	0.00499156		243	1084730		0.390601	1070450		0.389162	1047290		0.39037	679080
246	1050180		0.413058	1035030		0.4103	1030510		0.413718	0.412359	0.00181311		246	810750		0.40609	825340		0.402403	813320		0.404271	0.404255	0.00184362		246	634800		0.389668	626870		0.387296	616390		0.379914	308195	0.00508687		246	1070690		0.385545	1071510		0.389547	1043570		0.388984	675883
249	1050770		0.41329	1034220		0.409979	1030740		0.41381	0.41236	0.0020782		249	800180		0.400796	827450		0.403432	814820		0.405016	0.403081	0.00213181		249	637930		0.39159	632870		0.391003	617790		0.380777	308895	0.00608027		249	1069530		0.385127	1064970		0.38717	1044790		0.389438	676843
252	1047880		0.412153	1030520		0.408512	1032410		0.414481	0.411715	0.00300828		252	803260		0.402339	827190		0.403305	818410		0.406801	0.404148	0.00234736		252	635710		0.390227	629000		0.388612	612740		0.377665	306370	0.00683451		252	1071170		0.385718	1064810		0.387111	1046830		0.390199	676600
255	1047120		0.411854	1035280		0.410399	1022440		0.410478	0.410911	0.00081835		255	801960		0.401688	822090		0.400819	810990		0.403112	0.401873	0.00115807		255	634410		0.389429	631780		0.39033	621000		0.382756	310500	0.00413733		255	1072970		0.386366	1070000		0.388998	1042330		0.388521	676415
258	1044800		0.410942	1038950		0.411854	1019270		0.409205	0.410667	0.00134547		258	799370		0.40039	822040		0.400794	809900		0.402571	0.401252	0.00115992		258	633070		0.388606	629030		0.388631	613220		0.377961	306610	0.00615338		258	1074380		0.386874	1064080		0.386846	1045380		0.389658	675995
261	1046660		0.411673	1033440		0.40967	1022670		0.41057	0.410638	0.00100357		261	802460		0.401938	826780		0.403105	804130		0.399703	0.401582	0.00172908		261	638190		0.391749	627260		0.387537	615560		0.379403	307780	0.00627621		261	1070770		0.385574	1063890		0.386777	1043760		0.389054	675770
264	1041800		0.409762	1030840		0.408639	1015880		0.407844	0.408748	0.000963397		264	802230		0.401823	821410		0.400487	809680		0.402461	0.40159	0.00100741		264	631100		0.387397	626540		0.387092	614110		0.378509	307055	0.00504578		264	1067870		0.38453	1060560		0.385566	1045030		0.389528	676043
267	1044570		0.410851	1027780		0.407426	1019060		0.409121	0.409133	0.00171273		267	803480		0.402449	825000		0.402237	802580		0.398932	0.401206	0.00197221		267	632670		0.388361	625600		0.386511	609230		0.375501	304615	0.00695237		267	1065820		0.383791	1063720		0.386715	1040630		0.387888	672623
270	1040500		0.409251	1028360		0.407656	1013100		0.406728	0.407878	0.00127573		270	797480		0.399444	814770		0.39725	804770		0.400021	0.398905	0.00146201		270	629520		0.386427	631130		0.389928	611320		0.376789	305660	0.00680395		270	1070540		0.385491	1065860		0.387493	1040710		0.387918	673185
273	1033690		0.406572	1024350		0.406066	1018760		0.409001	0.407213	0.00156868		273	799200		0.400305	814880		0.397303	806810		0.401035	0.399548	0.00197764		273	626320		0.384463	629230		0.388754	610650		0.376377	305325	0.00628503		273	1066440		0.384015	1052000		0.382454	1038600		0.387131	671963
276	1036510		0.407681	1023210		0.405614	1016400		0.408053	0.407116	0.0013139		276	799970		0.400691	815960		0.39783	802720		0.399002	0.399174	0.00143825		276	627130		0.38496	624090		0.385578	606160		0.373609	303080	0.00673915		276	1066330		0.383975	1060480		0.385537	1039320		0.387399	671200
279	1033990		0.40669	1021420		0.404905	1017230		0.408386	0.40666	0.001741		279	793990		0.397696	816300		0.397996	799090		0.397197	0.39763	0.000403212		279	629050		0.386139	621490		0.383972	609330		0.375563	304665	0.00558656		279	1068110		0.384616	1056370		0.384043	1039640		0.387519	672153
282	1036440		0.407654	1022930		0.405503	1014100		0.40713	0.406762	0.00112127		282	798030		0.399719	818790		0.39921	804370		0.399822	0.399584	0.000327837		282	628160		0.385592	625740		0.386598	608210		0.374873	304105	0.00649883		282	1059140		0.381386	1057180		0.384337	1038720		0.387176	671413
285	1035730		0.407374	1020830		0.404671	1008320		0.404809	0.405618	0.00152249		285	800130		0.400771	817720		0.398688	803910		0.399593	0.399684	0.00104446		285	629740		0.386562	624240		0.385671	603420		0.37192	301710	0.00820844		285	1066100		0.383892	1058700		0.38489	1035210		0.385867	668460
288	1030600		0.405357	1021050		0.404758	1008310		0.404805	0.404973	0.000332797		288	794050		0.397726	809390		0.394627	797440		0.396377	0.396243	0.00155384		288	625840		0.384168	617510		0.381513	603180		0.371772	301590	0.0065268		288	1063590		0.382988	1055540		0.383741	1035410		0.385942	668500
291	1036500		0.407677	1018560		0.403771	1011230		0.405978	0.405809	0.00195859		291	794530		0.397966	806820		0.393374	805080		0.400175	0.397171	0.00346952		291	622990		0.382419	620940		0.383632	606740		0.373967	303370	0.00526531		291	1062380		0.382553	1057570		0.384479	1030840		0.384239	667105
294	1029020		0.404735	1017140		0.403208	1012340		0.406423	0.404789	0.00160822		294	787410		0.3944	812630		0.396206	803340		0.39931	0.396639	0.00248346		294	620730		0.381032	619330		0.382638	602960		0.371637	301480	0.00594225		294	1061880		0.382373	1057650		0.384508	1028790		0.383474	665135
297	1029870		0.40507	1014860		0.402304	1008880		0.405034	0.404136	0.00158639		297	792280		0.396839	810610		0.395221	800000		0.39765	0.39657	0.00123628		297	624890		0.383585	620740		0.383509	603340		0.371871	301670	0.00674126		297	1062060		0.382438	1058360		0.384766	1033650		0.385286	667660
300	1031430		0.405683	1015690		0.402633	1012700		0.406568	0.404961	0.00206412		300	794790		0.398096	817980		0.398815	799410		0.397356	0.398089	0.000729184		300	623460		0.382707	619800		0.382928	605610		0.37327	302805	0.00551342		300	1055020		0.379902	1051560		0.382294	1037840		0.386848	670323
303	1031170		0.405581	1012420		0.401337	1008430		0.404854	0.403924	0.00226952		303	793430		0.397415	811800		0.395802	795290		0.395309	0.396175	0.00110179		303	625030		0.383671	616850		0.381105	601060		0.370466	300530	0.00700204		303	1052900		0.379139	1048890		0.381324	1029050		0.383571	664790
306	1025710		0.403433	1007610		0.39943	1006910		0.404243	0.402369	0.00257697		306	786540		0.393964	807010		0.393466	797150		0.396233	0.394554	0.00147491		306	623100		0.382486	616300		0.380766	601590		0.370792	300795	0.00631372		306	1054280		0.379636	1050150		0.381782	1025830		0.382371	663313
309	1025230		0.403245	1006520		0.398998	1002550		0.402493	0.401579	0.002266		309	786640		0.394014	800720		0.390399	798680		0.396994	0.393802	0.00330216		309	619960		0.380559	616210		0.38071	603210		0.371791	301605	0.00510644		309	1053040		0.37919	1046820		0.380571	1023340		0.381443	662473
312	1025320		0.40328	1007220		0.399276	1003140		0.40273	0.401762	0.00217051		312	785460		0.393423	805580		0.392769	793610		0.394473	0.393555	0.000859886		312	621680		0.381615	614080		0.379394	598500		0.368888	299250	0.00679813		312	1050290		0.378199	1046560		0.380477	1027480		0.382986	663365
315	1025520		0.403359	1009180		0.400053	1000150		0.401529	0.401647	0.00165609		315	790460		0.395927	806140		0.393042	789670		0.392515	0.393828	0.00183701		315	617770		0.379215	612660		0.378517	597100		0.368025	298550	0.00626864		315	1049670		0.377976	1040360		0.378223	1029300		0.383665	663925
318	1023330		0.402497	1007980		0.399577	997900		0.400626	0.4009	0.00147929		318	778100		0.389737	800550		0.390317	792290		0.393817	0.39129	0.00220775		318	617730		0.37919	614130		0.379425	597210		0.368093	298605	0.00647593		318	1045310		0.376406	1041660		0.378695	1015510		0.378524	657058
321	1021140		0.401636	1009340		0.400116	996640		0.40012	0.400624	0.000876262		321	781390		0.391384	806560		0.393247	782610		0.389006	0.391212	0.00212574		321	617590		0.379104	613390		0.378968	594340		0.366324	297170	0.00733969		321	1038790		0.374058	1047570		0.380844	1021850		0.380888	659510
324	1019950		0.401168	1001380		0.396961	994290		0.399177	0.399102	0.00210458		324	782670		0.392026	802780		0.391404	791160		0.393256	0.392228	0.000942429		324	616970		0.378724	610220		0.377009	599270		0.369362	299635	0.00498404		324	1048170		0.377436	1044440		0.379706	1022540		0.381145	661088
327	1018950		0.400775	1000540		0.396628	997690		0.400542	0.399315	0.00232988		327	787710		0.39455	803120		0.39157	791910		0.393628	0.393249	0.00152594		327	617330		0.378945	612350		0.378325	598060		0.368617	299030	0.00579232		327	1048680		0.37762	1039380		0.377866	1017520		0.379274	658275
330	1017060		0.400031	1006690		0.399066	994970		0.39945	0.399516	0.000486098		330	777940		0.389656	803040		0.391531	786670		0.391024	0.390737	0.000969486		330	616180		0.378239	611470		0.377782	592980		0.365486	296490	0.00723465		330	1045630		0.376521	1046010		0.380277	1023720		0.381585	660105
333	1019280		0.400904	1001480		0.397	995310		0.399586	0.399164	0.00198601		333	780250		0.390813	795350		0.387781	788480		0.391924	0.390173	0.00214418		333	611870		0.375593	613280		0.3789	597790		0.36845	298895	0.00534085		333	1049600		0.377951	1040010		0.378095	1015900		0.37867	657398
336	1015560		0.399441	1001630		0.39706	991040		0.397872	0.398124	0.00121057		336	782610		0.391996	800690		0.390385	781660		0.388534	0.390305	0.00173236		336	617630		0.379129	611610		0.377868	601070		0.370472	300535	0.00467678		336	1043410		0.375722	1038650		0.377601	1022800		0.381242	661668
339	1015800		0.399536	1004730		0.398289	992400		0.398418	0.398747	0.000685621		339	781940		0.39166	800790		0.390434	782000		0.388703	0.390265	0.00148583		339	611720		0.375501	603740		0.373006	592840		0.365399	296420	0.00526192		339	1045920		0.376626	1033300		0.375656	1015830		0.378644	656125
342	1011010		0.397652	999260		0.39612	992360		0.398402	0.397391	0.00116287		342	779810		0.390593	802780		0.391404	791870		0.393609	0.391868	0.00156055		342	613650		0.376686	609460		0.37654	592120		0.364955	296060	0.00673066		342	1045490		0.376471	1038590		0.377579	1018990		0.379822	657525
345	1008400		0.396625	1000680		0.396683	993130		0.398711	0.39734	0.00118793		345	776840		0.389105	796290		0.38824	783850		0.389622	0.388989	0.000698601		345	615550		0.377852	605930		0.374359	588860		0.362946	294430	0.00779562		345	1045200		0.376366	1038890		0.377688	1013340		0.377716	653885
348	1017560		0.400228	989430		0.392224	988120		0.3967	0.396384	0.00401147		348	772020		0.386691	796480		0.388332	787080		0.391228	0.38875	0.00229697		348	611600		0.375427	608440		0.37591	588860		0.362946	294430	0.00734912		348	1040540		0.374688	1038190		0.377434	1015120		0.378379	654775
351	1008550		0.396684	999980		0.396406	982320		0.394371	0.39582	0.00126267		351	776290		0.38883	794930		0.387576	780050		0.387733	0.388047	0.000682925		351	607200		0.372726	607150		0.375113	589830		0.363544	294915	0.00610789		351	1038680		0.374019	1041100		0.378492	1015150		0.37839	655033
354	1015080		0.399252	995160		0.394495	988070		0.39668	0.396809	0.00238132		354	774350		0.387858	795410		0.38781	782670		0.389036	0.388235	0.000693952		354	610510		0.374758	611560		0.377837	590650		0.364049	295325	0.00723713		354	1040730		0.374757	1029630		0.374322	1017100		0.379117	656213
357	1008950		0.396841	993150		0.393698	985640		0.395704	0.395415	0.00159143		357	771440		0.386401	789100		0.384734	786400		0.39089	0.387341	0.00318384		357	612210		0.375802	603220		0.372684	589070		0.363076	294535	0.00663324		357	1033400		0.372117	1033190		0.375616	1008090		0.375759	651313
360	1004200		0.394973	993620		0.393885	980050		0.39346	0.394106	0.000780497		360	767420		0.384387	793640		0.386948	779090		0.387256	0.386197	0.00157492		360	610930		0.375016	608480		0.375934	588190		0.362533	294095	0.00748609		360	1038060		0.373795	1033320		0.375663	1008820		0.376031	651458
363	1002380		0.394257	990600		0.392687	985450		0.395628	0.394191	0.00147133		363	773080		0.387222	791310		0.385812	781590		0.388499	0.387177	0.00134419		363	609680		0.374249	600880		0.371239	588170		0.362521	294085	0.00609099		363	1040260		0.374588	1028870		0.374045	1004820		0.37454	649453
366	1012790		0.398352	986780		0.391173	985610		0.395692	0.395072	0.00362921		366	772690		0.387027	795430		0.38782	781400		0.388404	0.38775	0.000691442		366	605330		0.371578	606630		0.374791	588670		0.362829	294335	0.00619096		366	1031660		0.371491	1027840		0.373671	1008970		0.376087	651653
369	1008670		0.396731	992600		0.39348	974480		0.391224	0.393812	0.00276869		369	770060		0.385709	792410		0.386348	777650		0.38654	0.386199	0.000434943		369	602730		0.369982	602660		0.372338	587680		0.362219	293840	0.00529513		369	1035090		0.372726	1026870		0.373318	1010940		0.376821	652390
372	1002700		0.394383	986610		0.391106	980980		0.393833	0.393107	0.00175514		372	773110		0.387237	781180		0.380873	783260		0.389329	0.385813	0.00440442		372	609180		0.373942	601550		0.371653	587350		0.362015	293675	0.00632918		372	1033650		0.372207	1030060		0.374478	1007030		0.375364	650353
375	1003870		0.394843	984890		0.390424	977710		0.39252	0.392596	0.00221067		375	769930		0.385644	788420		0.384402	780110		0.387763	0.385937	0.0016993		375	609440		0.374101	600410		0.370948	584540		0.360284	292270	0.00724122		375	1026560		0.369654	1028110		0.373769	1006900		0.375315	649585
378	999790		0.393238	986000		0.390864	980160		0.393504	0.392535	0.00145371		378	763090		0.382218	788080		0.384237	775550		0.385497	0.383984	0.00165369		378	604160		0.37086	603150		0.372641	583290		0.359513	291645	0.0071213		378	1027350		0.369939	1030940		0.374798	1005210		0.374685	648428
381	1002800		0.394422	977020		0.387304	984770		0.395355	0.39236	0.00440367		381	765760		0.383556	780730		0.380653	776070		0.385755	0.383321	0.002559		381	601400		0.369166	598440		0.369731	583820		0.35984	291910	0.00555489		381	1033710		0.372229	1021450		0.371348	1003440		0.374025	647675
384	1000990		0.39371	987370		0.391407	982520		0.394451	0.39319	0.00158768		384	767210		0.384282	787620		0.384012	775650		0.385546	0.384614	0.000818917		384	604210		0.370891	604030		0.373185	585250		0.360721	292625	0.00663366		384	1034080		0.372362	1023530		0.372104	1006500		0.375166	649563
387	1000160		0.393384	985790		0.390781	971400		0.389987	0.391384	0.001777		387	761410		0.381377	782200		0.38137	772620		0.38404	0.382262	0.00153969		387	603160		0.370246	603050		0.372579	583560		0.359679	291780	0.00687399		387	1023670		0.368614	1023000		0.371911	1004370		0.374372	648075
390	998070		0.392562	983560		0.389897	978660		0.392902	0.391787	0.00164574		390	761660		0.381502	784760		0.382618	773380		0.384418	0.382846	0.00147125		390	601340		0.369129	599880		0.370621	582700		0.359149	291350	0.0062372		390	1028920		0.370504	1028450		0.373893	998290		0.372106	644820
393	1000370		0.393467	977330		0.387427	975580		0.391665	0.390853	0.00310069		393	764370		0.382859	782850		0.381687	772480		0.383971	0.382839	0.00114204		393	600430		0.368571	594490		0.367291	582030		0.358736	291015	0.00534672		393	1024320		0.368848	1026510		0.373187	1001310		0.373231	646163
396	999430		0.393097	980730		0.388775	975220		0.391521	0.391131	0.0021873		396	758970		0.380155	788730		0.384554	772900		0.384179	0.382963	0.00243888		396	599040		0.367717	594160		0.367087	579990		0.357479	289995	0.00573773		396	1027910		0.37014	1021460		0.371351	1000070		0.372769	645033
399	986870		0.388157	980600		0.388723	981990		0.394239	0.390373	0.00335982		399	764880		0.383115	780810		0.380692	768800		0.382141	0.381983	0.00121913		399	597200		0.366588	594740		0.367445	584040		0.359975	292020	0.00408781		399	1023520		0.36856	1023040		0.371926	996320		0.371371	644170
402	992880		0.390521	976300		0.387019	966590		0.388056	0.388532	0.00179882		402	762970		0.382158	778210		0.379424	767770		0.381629	0.381071	0.00144997		402	602660		0.369939	595650		0.368008	580230		0.357627	290115	0.00662171		402	1029610		0.370753	1015490		0.369181	998510		0.372188	644313
[truncated: 25 more columns]

## Sheet: 1E
XKR8/basigin
volume [ml]	A280 [mAU]
0	-0.019
0.037	0.006		full raw gel		lane shown
0.075	0.021
0.112	-0.008
0.15	-0.024
0.187	-0.002
0.225	-0.012
0.262	-0.013
0.3	-0.007
0.337	0.019
0.375	-0.009
0.412	-0.024
0.45	-0.036
0.487	-0.017
0.525	-0.014
0.562	-0.007
0.6	-0.03
0.637	-0.015
0.675	-0.019
0.712	-0.023
0.75	-0.016
0.787	-0.02
0.825	-0.005
0.862	-0.036
0.9	-0.03
0.937	-0.009
0.975	-0.006
1.012	-0.024
1.05	-0.032
1.087	-0.022
1.125	-0.03
1.162	-0.025
1.2	-0.009
1.237	-0.006
1.275	-0.027
1.312	-0.022
1.35	-0.025
1.387	-0.015
1.425	-0.022
1.462	-0.026
1.499	-0.008
1.537	-0.018
1.574	-0.013
1.612	-0.02
1.649	-0.019
1.687	-0.031
1.724	-0.02
1.762	-0.028
1.799	-0.021
1.837	-0.021
1.874	-0.017
1.912	-0.028
1.949	-0.004
1.987	-0.004
2.024	-0.004
2.062	-0.028
2.099	-0.018
2.137	-0.022
2.174	-0.014
2.212	-0.017
2.249	-0.03
2.287	-0.014
2.324	-0.026
2.362	-0.017
2.399	-0.032
2.437	-0.005
2.474	-0.011
2.512	-0.002
2.549	-0.018
2.587	-0.006
2.624	-0.02
2.662	-0.021
2.699	-0.04
2.737	-0.021
2.774	-0.019
2.812	-0.016
2.849	-0.008
2.887	-0.029
2.924	-0.016
2.962	-0.026
2.999	-0.021
3.036	-0.029
3.074	-0.016
3.111	-0.014
3.149	0.002
3.186	-0.018
3.224	-0.01
3.261	-0.019
3.299	-0.028
3.336	-0.029
3.374	-0.029
3.411	-0.029
3.449	-0.013
3.486	-0.011
3.524	-0.015
3.561	-0.017
3.599	-0.001
3.636	-0.016
3.674	-0.003
3.711	0.001
3.749	-0.009
3.786	0.002
3.824	-0.013
3.861	-0.008
3.899	-0.005
3.936	-0.014
3.974	-0.004
4.011	-0.021
4.049	-0.013
4.086	-0.011
4.124	-0.006
4.161	-0.012
4.199	-0.018
4.236	-0.006
4.274	-0.005
4.311	-0.012
4.349	-0.001
4.386	-0.006
4.424	0.002
4.461	0.033
4.498	0.021
4.536	0.016
4.573	0.038
4.611	0.054
4.648	0.067
4.686	0.076
4.723	0.069
4.761	0.076
4.798	0.067
4.836	0.081
4.873	0.104
4.911	0.078
4.948	0.097
4.986	0.084
5.023	0.096
5.061	0.101
5.098	0.084
5.136	0.077
5.173	0.071
5.211	0.09
5.248	0.065
5.286	0.039
5.323	0.033
5.361	0.032
5.398	0.024
5.436	0.024
5.473	0.005
5.511	0.013
5.548	0.004
5.586	0.015
5.623	0.012
5.661	0.01
5.698	0.001
5.736	0
5.773	0.002
5.811	0.001
5.848	-0.008
5.886	0.01
5.923	0.012
5.961	-0.001
5.998	-0.002
6.035	-0.002
6.073	0.004
6.11	0
6.148	0.003
6.185	0.01
6.223	-0.013
6.26	0.004
6.298	-0.001
6.335	0.004
6.373	0.023
6.41	0.02
6.448	0.024
6.485	0.039
6.523	0.044
6.56	0.048
6.598	0.08
6.635	0.104
6.673	0.117
6.71	0.14
6.748	0.184
6.785	0.216
6.823	0.28
6.86	0.368
6.898	0.432
6.935	0.563
6.973	0.703
7.01	0.881
7.048	1.035
7.085	1.221
7.123	1.332
7.16	1.43
7.198	1.522
7.235	1.542
7.273	1.567
7.31	1.548
7.348	1.501
7.385	1.442
7.423	1.362
7.46	1.298
7.497	1.249
7.535	1.152
7.572	1.118
7.61	1.064
7.647	1.036
7.685	1.016
7.722	0.981
7.76	0.967
7.797	0.966
7.835	0.956
7.872	0.956
7.91	0.955
7.947	0.956
7.985	0.962
8.022	0.979
8.06	0.983
8.097	0.981
8.135	0.999
8.172	1.011
8.21	1.039
8.247	1.047
8.285	1.065
8.322	1.106
8.36	1.121
8.397	1.154
8.435	1.177
8.472	1.188
8.51	1.202
8.547	1.238
8.585	1.259
8.622	1.28
8.66	1.3
8.697	1.32
8.735	1.347
8.772	1.385
8.81	1.435
8.847	1.424
8.885	1.458
8.922	1.473
8.96	1.489
8.997	1.53
9.034	1.55
9.072	1.574
9.109	1.584
9.147	1.635
9.184	1.652
9.222	1.669
9.259	1.715
9.297	1.732
9.334	1.766
9.372	1.798
9.409	1.836
9.447	1.845
9.484	1.865
9.522	1.878
9.559	1.92
9.597	1.95
9.634	1.998
9.672	1.986
9.709	2.026
9.747	2.052
9.784	2.072
9.822	2.107
9.859	2.129
9.897	2.167
9.934	2.198
9.972	2.227
10.009	2.252
10.047	2.286
10.084	2.302
10.122	2.352
10.159	2.367
10.197	2.421
10.234	2.435
10.272	2.478
10.309	2.507
10.347	2.532
10.384	2.585
10.422	2.61
10.459	2.654
10.496	2.687
10.534	2.718
10.571	2.778
10.609	2.805
10.646	2.869
10.684	2.912
10.721	2.968
10.759	2.997
10.796	3.063
10.834	3.118
10.871	3.169
10.909	3.235
10.946	3.3
10.984	3.368
11.021	3.406
11.059	3.488
11.096	3.548
11.134	3.638
11.171	3.724
11.209	3.805
11.246	3.877
11.284	3.941
11.321	4.042
11.359	4.128
11.396	4.226
11.434	4.312
11.471	4.427
11.509	4.519
11.546	4.615
11.584	4.725
11.621	4.81
11.659	4.931
11.696	5.056
11.734	5.177
11.771	5.29
11.809	5.393
11.846	5.55
11.884	5.639
11.921	5.767
11.959	5.893
11.996	6.036
12.033	6.157
12.071	6.289
12.108	6.424
12.146	6.572
12.183	6.703
12.221	6.842
12.258	7.02
12.296	7.178
12.333	7.331
12.371	7.511
12.408	7.678
12.446	7.89
12.483	8.083
12.521	8.296
12.558	8.522
12.596	8.797
12.633	9.042
12.671	9.351
12.708	9.62
12.746	9.961
12.783	10.305
12.821	10.678
12.858	11.057
12.896	11.501
12.933	11.935
12.971	12.428
13.008	12.814
13.046	13.295
13.083	13.765
13.121	14.264
13.158	14.694
13.196	15.181
13.233	15.63
13.271	16.05
13.308	16.38
13.346	16.712
13.383	17.006
13.421	17.262
13.458	17.432
13.495	17.546
13.533	17.594
13.57	17.672
13.608	17.582
13.645	17.421
13.683	17.252
13.72	17.025
13.758	16.784
13.795	16.416
13.833	16.044
13.87	15.664
13.908	15.253
13.945	14.793
13.983	14.304
14.02	13.817
14.058	13.354
14.095	12.808
14.133	12.304
14.17	11.81
14.208	11.354
14.245	10.826
14.283	10.352
14.32	9.882
14.358	9.473
14.395	9.032
14.433	8.604
14.47	8.194
14.508	7.849
14.545	7.454
14.583	7.121
14.62	6.769
14.658	6.47
14.695	6.145
14.733	5.888
14.77	5.591
14.808	5.337
14.845	5.07
14.883	4.849
14.92	4.643
14.958	4.447
14.995	4.238
15.032	4.042
15.07	3.854
15.107	3.692
15.145	3.517
15.182	3.392
15.22	3.243
15.257	3.121
15.295	2.983
15.332	2.87
15.37	2.78
15.407	2.651
15.445	2.578
15.482	2.502
15.52	2.404
15.557	2.33
15.595	2.233
15.632	2.203
15.67	2.145
15.707	2.097
15.745	2.043
15.782	2.021
15.82	2.002
15.857	1.974
15.895	1.991
15.932	1.984
15.97	1.989
16.007	2
16.045	2.009
16.082	2.023
16.12	2.049
16.157	2.085
16.195	2.126
16.232	2.125
16.27	2.167
16.307	2.193
16.345	2.206
16.382	2.219
16.42	2.239
16.457	2.236
16.494	2.191
16.532	2.186
16.569	2.147
16.607	2.114
16.644	2.074
16.682	2.027
16.719	1.973
16.757	1.888
16.794	1.833
16.832	1.762
16.869	1.697
16.907	1.653
16.944	1.565
16.982	1.478
17.019	1.432
17.057	1.365
17.094	1.312
17.132	1.24
17.169	1.181
17.207	1.142
17.244	1.095
17.282	1.049
17.319	1.005
17.357	0.981
17.394	0.956
17.432	0.91
17.469	0.879
17.507	0.848
17.544	0.81
17.582	0.796
17.619	0.772
17.657	0.746
17.694	0.741
17.732	0.707
17.769	0.69
17.807	0.665
17.844	0.644
17.882	0.639
17.919	0.611
17.957	0.6
17.994	0.6
18.031	0.579
18.069	0.567
18.106	0.548
18.144	0.526
18.181	0.505
18.219	0.506
18.256	0.488
18.294	0.473
18.331	0.456
18.369	0.442
18.406	0.437
18.444	0.43
18.481	0.41
18.519	0.407
18.556	0.398
18.594	0.419
18.631	0.406
18.669	0.405
18.706	0.407
18.744	0.41
18.781	0.417
18.819	0.434
18.856	0.457
18.894	0.462
18.931	0.475
18.969	0.464
19.006	0.464
19.044	0.468
19.081	0.486
19.119	0.461
19.156	0.458
19.194	0.433
19.231	0.429
19.269	0.412
19.306	0.428
19.344	0.425
19.381	0.443
19.419	0.473
19.456	0.442
19.493	0.406
19.531	0.405
19.568	0.411
19.606	0.403
19.643	0.414
19.681	0.442
19.718	0.434
19.756	0.469
19.793	0.473
19.831	0.495
19.868	0.483
19.906	0.484
19.943	0.494
19.981	0.49
20.018	0.496
20.056	0.487
20.093	0.489
20.131	0.489
20.168	0.464
20.206	0.49
20.243	0.476
20.281	0.46
20.318	0.464
20.356	0.445
20.393	0.437
20.431	0.415
20.468	0.42
20.506	0.394
20.543	0.396
20.581	0.382
20.618	0.393
20.656	0.371
20.693	0.364
20.731	0.331
20.768	0.335
20.806	0.304
20.843	0.303
20.881	0.283
20.918	0.26
20.956	0.251
20.993	0.23
21.03	0.222
21.068	0.211
21.105	0.202
21.143	0.196
21.18	0.207
21.218	0.174
21.255	0.169
21.293	0.179
21.33	0.16
21.368	0.165
21.405	0.146
21.443	0.147
21.48	0.161
21.518	0.148
21.555	0.155
21.593	0.175
21.63	0.165
21.668	0.157
21.705	0.177
21.743	0.19
21.78	0.194
21.818	0.204
21.855	0.219
21.893	0.234
21.93	0.266
21.968	0.266
22.005	0.273
22.043	0.283
22.08	0.294
22.118	0.288
22.155	0.296
22.193	0.31
22.23	0.309
22.268	0.295
22.305	0.29
22.343	0.293
22.38	0.283
22.418	0.261
22.455	0.246
22.492	0.244
22.53	0.221
22.567	0.228
22.605	0.204
22.642	0.209
22.68	0.183
22.717	0.157
22.755	0.166
22.792	0.166
22.83	0.141
22.867	0.146
22.905	0.132
22.942	0.127
22.98	0.131
23.017	0.123
23.055	0.095
23.092	0.109
23.13	0.098
23.167	0.106
23.205	0.113
23.242	0.111
23.28	0.118
23.317	0.099
23.355	0.094
23.392	0.122
23.43	0.108
23.467	0.082
23.505	0.098
23.542	0.097
23.58	0.102
23.617	0.084
23.655	0.098
23.692	0.091
23.73	0.092
23.767	0.105
23.805	0.08
23.842	0.094
23.88	0.08
23.917	0.095
23.955	0.095
23.992	0.095
24.029	0.103
24.067	0.115
24.104	0.141
24.142	0.115
24.179	0.098
24.217	0.093
24.254	0.101
24.292	0.089
24.329	0.115
24.367	0.096
24.404	0.095
24.442	0.095
24.479	0.107
24.517	0.116
24.554	0.099
24.592	0.1
24.629	0.117
24.667	0.108
24.704	0.093
24.742	0.117
24.779	0.106
24.817	0.097
24.854	0.109
24.892	0.098
24.929	0.11
24.967	0.123
25.004	0.112
25.042	0.097
25.079	0.112
25.117	0.094
25.154	0.103
25.192	0.1
25.229	0.1
25.267	0.1
25.304	0.086
25.342	0.092
25.379	0.095
25.417	0.089
25.454	0.11
25.491	0.101
25.529	0.095
25.566	0.095
25.604	0.111
25.641	0.088
25.679	0.088
25.716	0.102
25.754	0.097
25.791	0.087
25.829	0.091
25.866	0.084
25.904	0.097
25.941	0.086
25.979	0.086
26.016	0.088
26.054	0.085
26.091	0.078
26.129	0.105
26.166	0.098
26.204	0.09
26.241	0.08
26.279	0.085
26.316	0.094
26.354	0.089
26.391	0.1
26.429	0.088
26.466	0.079
26.504	0.096
26.541	0.077
26.579	0.088
26.616	0.093
26.654	0.085
26.691	0.104
26.729	0.085
26.766	0.074
26.804	0.086
26.841	0.064
26.879	0.08
26.916	0.07
26.954	0.078
26.991	0.081
27.028	0.081
27.066	0.081
27.103	0.088
27.141	0.07
27.178	0.073
27.216	0.086
27.253	0.082
27.291	0.08
27.328	0.091
27.366	0.094
27.403	0.072
27.441	0.077
27.478	0.089
27.516	0.076
27.553	0.08
27.591	0.085
27.628	0.058
27.666	0.093
27.703	0.089
27.741	0.051
27.778	0.086
27.816	0.079
27.853	0.06
27.891	0.084
27.928	0.086
27.966	0.084
28.003	0.067
28.041	0.071
28.078	0.067
28.116	0.062
28.153	0.077
28.191	0.064
28.228	0.071
28.266	0.075
28.303	0.091
28.341	0.072
28.378	0.061
28.416	0.072
28.453	0.066
28.49	0.058
28.528	0.073
28.565	0.069
28.603	0.06
28.64	0.065
28.678	0.08
28.715	0.088
28.753	0.081
28.79	0.081
28.828	0.065
28.865	0.06
28.903	0.061
28.94	0.06
28.978	0.065
29.015	0.069
29.053	0.063
29.09	0.095
29.128	0.091
29.165	0.073
29.203	0.081
29.24	0.06
29.278	0.065
29.315	0.086
29.353	0.064
29.39	0.06
29.428	0.062
29.465	0.075
29.503	0.064
29.54	0.052
29.578	0.055
29.615	0.047
29.653	0.072
29.69	0.062
29.728	0.063
29.765	0.06
29.803	0.056
29.84	0.054
29.878	0.055
29.915	0.046
29.953	0.06
29.99	0.06
30.027	0.067
30.065	0.066
30.102	0.059
30.14	0.045
30.177	0.04
30.215	0.047
30.252	0.063
30.29	0.06
30.327	0.058
30.365	0.047
30.402	0.071
30.44	0.07
30.477	0.065
30.515	0.056
30.552	0.055
30.59	0.067
30.627	0.053
30.665	0.062
30.702	0.05
30.74	0.069
30.777	0.07
30.815	0.067
30.852	0.08
30.89	0.066
30.927	0.046
30.965	0.058
31.002	0.075
31.04	0.065
31.077	0.057
31.115	0.058
31.152	0.056
31.19	0.052
31.227	0.045
31.265	0.047
31.302	0.054
31.34	0.045
31.377	0.047
31.415	0.053
31.452	0.058
31.489	0.047
31.527	0.046
31.564	0.043
31.602	0.04
31.639	0.058
31.677	0.047
31.714	0.039
31.752	0.045
31.789	0.036
31.827	0.039
31.864	0.064
31.902	0.056
31.939	0.048
31.977	0.049
32.014	0.061
32.052	0.067
32.089	0.059
32.127	0.029
32.164	0.045
32.202	0.039
32.239	0.056
32.277	0.067
32.314	0.047
32.352	0.023
32.389	0.042
32.427	0.053
32.464	0.04
32.502	0.031
32.539	0.044
32.577	0.049
32.614	0.031
32.652	0.042
32.689	0.027
32.727	0.033
32.764	0.037
32.802	0.028
32.839	0.042
32.877	0.043
32.914	0.048
32.952	0.045
32.989	0.039
33.026	0.035
33.064	0.04
33.101	0.048
33.139	0.035
33.176	0.025
33.214	0.041
33.251	0.028
33.289	0.033
33.326	0.027
33.364	0.026
33.401	0.026
33.439	0.034
33.476	0.028
33.514	0.031
33.551	0.041
33.589	0.032
33.626	0.029
33.664	0.044
33.701	0.018
33.739	0.034
33.776	0.037
33.814	0.026
33.851	0.02
33.889	0.034
33.926	0.034
33.964	0.02

## Sheet: 1G
	full raw gel		lane shown						full raw gel		lanes shown

## Sheet: 1S1A
XKR9 SEC			XKR9 MALS - peak 1			XKR9 MALS - peak 2
volume [ml]	A280 [mAU]		volume [ml]	Molar mass [Da]		volume [ml]	Molar mass [Da]
6.875e-05	0.000733404		1.16637	89790.8		1.25293	43232.9
0.000137017	0.000739469		1.16644	89852.1		1.253	43226.9
0.000205284	0.000745523		1.16651	89837.7		1.25307	43211.9
0.00027355	0.000751566		1.16658	89808.9		1.25314	43202.8
0.000341817	0.000757597		1.16664	89819.2		1.25321	43198.1
0.000410084	0.000763615		1.16671	89811.6		1.25327	43196.8
0.000478351	0.00076962		1.16678	89850.9		1.25334	43198.7
0.000546618	0.000775611		1.16685	89879.8		1.25341	43197.2
0.000614885	0.000781588		1.16692	89856		1.25348	43195.2
0.000683151	0.00078755		1.16699	89848.6		1.25355	43191.6
0.000751418	0.000793496		1.16705	89843		1.25362	43177.3
0.000819685	0.000799427		1.16712	89835.4		1.25368	43171.5
0.000887952	0.00080534		1.16719	89831.2		1.25375	43169.4
0.000956219	0.000811237		1.16726	89866.7		1.25382	43170.5
0.00102449	0.000817116		1.16733	89895.2		1.25389	43171.3
0.00109275	0.000822976		1.16739	89907.4		1.25396	43169
0.00116102	0.000828818		1.16746	89896.5		1.25403	43171.6
0.00122929	0.00083464		1.16753	89890.6		1.25409	43176.2
0.00129755	0.000840443		1.1676	89901.4		1.25416	43191.4
0.00136582	0.000846225		1.16767	89900.7		1.25423	43204
0.00143409	0.000851986		1.16774	89915.8		1.2543	43202.5
0.00150235	0.000857727		1.1678	89950.4		1.25437	43205.2
0.00157062	0.000863445		1.16787	89958.5		1.25443	43205.1
0.00163889	0.000869142		1.16794	89951.6		1.2545	43205
0.00170715	0.000874816		1.16801	89983.1		1.25457	43208.4
0.00177542	0.000880467		1.16808	89990.9		1.25464	43207.7
0.00184369	0.000886094		1.16815	89974.9		1.25471	43205.8
0.00191195	0.000891698		1.16821	89995		1.25478	43208.8
0.00198022	0.000897278		1.16828	90009.7		1.25484	43209.5
0.00204849	0.000902833		1.16835	89973.9		1.25491	43204.8
0.00211676	0.000908362		1.16842	89984.4		1.25498	43189.3
0.00218502	0.000913867		1.16849	90036.7		1.25505	43179.5
0.00225329	0.000919346		1.16856	90031.1		1.25512	43182.4
0.00232155	0.000924799		1.16862	90031		1.25519	43181.1
0.00238982	0.000930226		1.16869	90051.5		1.25526	43173.9
0.00245809	0.000935626		1.16876	90040.5		1.25532	43166.9
0.00252636	0.000940999		1.16883	90027.6		1.25539	43164.8
0.00259462	0.000946344		1.1689	90051.9		1.25546	43167.5
0.00266289	0.000951662		1.16897	90070.4		1.25553	43164.7
0.00273116	0.000956953		1.16903	90076.2		1.2556	43166
0.00279942	0.000962215		1.1691	90091.5		1.25566	43157.2
0.00286769	0.000967448		1.16917	90087.3		1.25573	43146.9
0.00293596	0.000972654		1.16924	90097.8		1.2558	43151
0.00300422	0.00097783		1.16931	90134.1		1.25587	43155.2
0.00307249	0.000982977		1.16938	90139		1.25594	43154.3
0.00314076	0.000988095		1.16944	90149		1.25601	43152.3
0.00320902	0.000993183		1.16951	90177.7		1.25607	43149.3
0.00327729	0.000998242		1.16958	90186.1		1.25614	43147.8
0.00334556	0.00100327		1.16965	90181		1.25621	43150.9
0.00341382	0.00100827		1.16972	90197.1		1.25628	43152.6
0.00348209	0.00101324		1.16979	90224.4		1.25635	43154.8
0.00355036	0.00101818		1.16985	90240		1.25642	43156.4
0.00361862	0.00102308		1.16992	90245.9		1.25648	43159
0.00368689	0.00102796		1.16999	90252.1		1.25655	43162.9
0.00375516	0.0010328		1.17006	90228.8		1.25662	43165.3
0.00382343	0.00103762		1.17013	90226.3		1.25669	43168.4
0.00389169	0.0010424		1.17019	90261.9		1.25676	43169.5
0.00395996	0.00104716		1.17026	90273.9		1.25683	43172.6
0.00402823	0.00105188		1.17033	90276.9		1.25689	43177.3
0.00409649	0.00105657		1.1704	90291.2		1.25696	43178
0.00416476	0.00106123		1.17047	90297.8		1.25703	43181.7
0.00423303	0.00106585		1.17054	90304		1.2571	43187.3
0.00430129	0.00107045		1.1706	90326.7		1.25717	43187.3
0.00436956	0.00107501		1.17067	90344.2		1.25723	43190.9
0.00443783	0.00107954		1.17074	90339.6		1.2573	43193.8
0.00450609	0.00108404		1.17081	90349.4		1.25737	43195.7
0.00457436	0.00108851		1.17088	90362.3		1.25744	43202.9
0.00464263	0.00109295		1.17094	90360.3		1.25751	43202.3
0.00471089	0.00109735		1.17101	90360.7		1.25758	43203.9
0.00477916	0.00110173		1.17108	90373.1		1.25764	43208
0.00484743	0.00110607		1.17115	90378.9		1.25771	43204.6
0.00491569	0.00111038		1.17122	90394.6		1.25778	43171.3
0.00498396	0.00111465		1.17129	90429.2		1.25785	43146.1
0.00505223	0.0011189		1.17135	90435.9		1.25792	43147.7
0.0051205	0.00112311		1.17142	90410.5		1.25798	43152.6
0.00518876	0.00112729		1.17149	90430.8		1.25805	43155.1
0.00525703	0.00113144		1.17156	90459.5		1.25812	43158.3
0.00532529	0.00113556		1.17163	90446.1		1.25819	43161.4
0.00539356	0.00113965		1.1717	90460.8		1.25826	43165.8
0.00546183	0.0011437		1.17176	90500.8		1.25833	43172
0.0055301	0.00114773		1.17183	90515.4		1.25839	43174.9
0.00559836	0.00115172		1.1719	90500.8		1.25846	43178.4
0.00566663	0.00115568		1.17197	90508		1.25853	43181
0.0057349	0.00115961		1.17204	90528		1.2586	43181.9
0.00580316	0.00116351		1.17211	90532.5		1.25867	43186.8
0.00587143	0.00116737		1.17217	90550.6		1.25874	43188.7
0.0059397	0.00117121		1.17224	90557.6		1.2588	43191.9
0.00600796	0.00117501		1.17231	90541.1		1.25887	43196
0.00607623	0.00117879		1.17238	90576.2		1.25894	43197.5
0.0061445	0.00118253		1.17245	90605.9		1.25901	43203.1
0.00621276	0.00118624		1.17251	90601.7		1.25908	43209
0.00628103	0.00118992		1.17258	90600		1.25915	43209.1
0.0063493	0.00119357		1.17265	90619.7		1.25921	43214.1
0.00641756	0.0011972		1.17272	90626.8		1.25928	43214.8
0.00648583	0.00120079		1.17279	90633.6		1.25935	43218.4
0.0065541	0.00120435		1.17286	90662.7		1.25942	43222.7
0.00662236	0.00120788		1.17292	90682.4		1.25949	43224.1
0.00669063	0.00121138		1.17299	90698.4		1.25955	43229.6
0.0067589	0.00121485		1.17306	90708.2		1.25962	43234.2
0.00682716	0.00121829		1.17313	90717.7		1.25969	43235.4
0.00689543	0.0012217		1.1732	90735.2		1.25976	43239.3
0.0069637	0.00122508		1.17327	90730.4		1.25983	43243.7
0.00703197	0.00122843		1.17333	90733.1		1.2599	43247.1
0.00710023	0.00123176		1.1734	90756.8		1.25997	43250
0.0071685	0.00123506		1.17347	90754.7		1.26003	43251.9
0.00723677	0.00123832		1.17354	90772.8		1.2601	43257.7
0.00730503	0.00124156		1.17361	90805.2		1.26017	43261.6
0.0073733	0.00124477		1.17368	90788.8		1.26024	43263.9
0.00744157	0.00124795		1.17374	90815.3		1.26031	43268.7
0.00750983	0.0012511		1.17381	90870		1.26038	43271.8
0.0075781	0.00125423		1.17388	90873.4		1.26044	43276.2
0.00764637	0.00125733		1.17395	90865.5		1.26051	43278.1
0.00771463	0.0012604		1.17402	90864		1.26058	43281.9
0.0077829	0.00126344		1.17409	90879.4		1.26065	43286.9
0.00785117	0.00126645		1.17415	90908.8		1.26072	43287.4
0.00791944	0.00126944		1.17422	90926.1		1.26078	43292.2
0.0079877	0.0012724		1.17429	90922.5		1.26085	43297.6
0.00805597	0.00127534		1.17436	90927.4		1.26092	43299.9
0.00812424	0.00127824		1.17443	90948.4		1.26099	43305.6
0.0081925	0.00128113		1.1745	90954.4		1.26106	43310.4
0.00826077	0.00128398		1.17456	90968.6		1.26113	43312.2
0.00832904	0.00128681		1.17463	90968.8		1.26119	43317.9
0.0083973	0.00128962		1.1747	90961.6		1.26126	43320.5
0.00846557	0.00129239		1.17477	90986.4		1.26133	43325.6
0.00853384	0.00129514		1.17484	91015.1		1.2614	43329.3
0.0086021	0.00129787		1.17491	91035.1		1.26147	43331
0.00867037	0.00130057		1.17497	91053.9		1.26154	43336.6
0.00873864	0.00130325		1.17504	91056.8		1.2616	43341.5
0.0088069	0.0013059		1.17511	91060.7		1.26167	43343.6
0.00887517	0.00130853		1.17518	91068.5		1.26174	43348.2
0.00894344	0.00131113		1.17525	91067.6		1.26181	43351.9
0.0090117	0.00131371		1.17531	91075		1.26188	43354.9
0.00907997	0.00131627		1.17538	91095.8		1.26195	43357.5
0.00914824	0.0013188		1.17545	91129.3		1.26201	43359.2
0.0092165	0.0013213		1.17552	91141.6		1.26208	43363.8
0.00928477	0.00132379		1.17559	91152.1		1.26215	43366.7
0.00935304	0.00132625		1.17565	91158.2		1.26222	43370
0.0094213	0.00132868		1.17572	91146.8		1.26229	43374.3
0.00948957	0.0013311		1.17579	91155.7		1.26235	43376.2
0.00955784	0.00133349		1.17586	91176		1.26242	43379.8
0.0096261	0.00133586		1.17593	91184.9		1.26249	43380.8
0.00969437	0.0013382		1.176	91205.4		1.26256	43384.9
0.00976264	0.00134053		1.17606	91224.7		1.26263	43389.8
0.00983091	0.00134283		1.17613	91236.5		1.2627	43391.5
0.00989917	0.00134511		1.1762	91246.1		1.26276	43395.7
0.00996744	0.00134737		1.17627	91244.1		1.26283	43398.6
0.0100357	0.0013496		1.17634	91254		1.2629	43399.5
0.010104	0.00135182		1.17641	91268.3		1.26297	43404.9
0.0101722	0.00135401		1.17647	91270.1		1.26304	43409.1
0.0102405	0.00135618		1.17654	91254.1		1.2631	43411.1
0.0103088	0.00135834		1.17661	91249.8		1.26317	43414.5
0.010377	0.00136047		1.17668	91283		1.26324	43414.8
0.0104453	0.00136258		1.17675	91316.4		1.26331	43419.3
0.0105136	0.00136467		1.17682	91327.7		1.26338	43425
0.0105818	0.00136674		1.17688	91341.4		1.26345	43428.1
0.0106501	0.00136879		1.17695	91359.5		1.26351	43431.6
0.0107184	0.00137082		1.17702	91366.5		1.26358	43433.4
0.0107866	0.00137283		1.17709	91359.7		1.26365	43435.9
0.0108549	0.00137482		1.17716	91368.5		1.26372	43439.8
0.0109232	0.00137679		1.17723	91383.5		1.26379	43442.6
0.0109914	0.00137874		1.17729	91406.6		1.26386	43446.2
0.0110597	0.00138068		1.17736	91430.3		1.26392	43449.6
0.011128	0.00138259		1.17743	91443.2		1.26399	43453.1
0.0111962	0.00138448		1.1775	91447		1.26406	43456.8
0.0112645	0.00138636		1.17757	91431.2		1.26413	43458.3
0.0113328	0.00138822		1.17763	91440.9		1.2642	43460.9
0.011401	0.00139006		1.1777	91469.8		1.26427	43465.5
0.0114693	0.00139188		1.17777	91471.1		1.26433	43468
0.0115376	0.00139369		1.17784	91486.9		1.2644	43471.5
0.0116058	0.00139547		1.17791	91521.8		1.26447	43471.9
0.0116741	0.00139724		1.17798	91529.6		1.26454	43474.9
0.0117424	0.00139899		1.17805	91517.4		1.26461	43478.4
0.0118106	0.00140073		1.17811	91537.2		1.26467	43480.9
0.0118789	0.00140244		1.17818	91556		1.26474	43485.7
0.0119472	0.00140414		1.17825	91568.6		1.26481	43490.6
0.0120154	0.00140583		1.17832	91566.8		1.26488	43492.5
0.0120837	0.00140749		1.17839	91564.9		1.26495	43494.8
0.012152	0.00140914		1.17845	91583.3		1.26502	43497.4
0.0122202	0.00141077		1.17852	91589.6		1.26509	43501.1
0.0122885	0.00141239		1.17859	91603.6		1.26515	43503.8
0.0123568	0.00141399		1.17866	91626.4		1.26522	43506.6
0.012425	0.00141558		1.17873	91631		1.26529	43510.1
0.0124933	0.00141714		1.1788	91637.8		1.26536	43512.3
0.0125616	0.00141869		1.17886	91632.9		1.26543	43514.3
0.0126298	0.00142023		1.17893	91615.2		1.2655	43518.3
0.0126981	0.00142175		1.179	91639.6		1.26556	43521.7
0.0127664	0.00142326		1.17907	91681.4		1.26563	43524.5
0.0128346	0.00142475		1.17914	91669.6		1.2657	43526.2
0.0129029	0.00142622		1.17921	91657.8		1.26577	43529.1
0.0129712	0.00142768		1.17927	91680.9		1.26584	43532.8
0.0130394	0.00142913		1.17934	91701		1.2659	43534.4
0.0131077	0.00143056		1.17941	91715.5		1.26597	43537.9
0.013176	0.00143198		1.17948	91740.5		1.26604	43541.4
0.0132442	0.00143338		1.17955	91737.6		1.26611	43542.5
0.0133125	0.00143476		1.17962	91752.9		1.26618	43545.2
0.0133808	0.00143614		1.17968	91777.1		1.26625	43548.7
0.013449	0.0014375		1.17975	91768.7		1.26631	43552.8
0.0135173	0.00143884		1.17982	91759.7		1.26638	43555.2
0.0135856	0.00144017		1.17989	91789.3		1.26645	43557.1
0.0136538	0.00144149		1.17996	91812.5		1.26652	43559
0.0137221	0.00144279		1.18003	91808.9		1.26659	43561
0.0137904	0.00144408		1.18009	91825.7		1.26666	43562.8
0.0138586	0.00144535		1.18016	91851.8		1.26672	43567.1
0.0139269	0.00144662		1.18023	91865.4		1.26679	43570
0.0139952	0.00144787		1.1803	91861.2		1.26686	43572.2
0.0140634	0.0014491		1.18037	91864.9		1.26693	43575.2
0.0141317	0.00145033		1.18043	91860.1		1.267	43576.6
0.0142	0.00145154		1.1805	91859.8		1.26707	43579.4
0.0142682	0.00145273		1.18057	91871.7		1.26713	43582.3
0.0143365	0.00145392		1.18064	91884.7		1.2672	43585.5
0.0144048	0.00145509		1.18071	91890		1.26727	43588.2
0.014473	0.00145625		1.18078	91902.3		1.26734	43589.7
0.0145413	0.0014574		1.18084	91907.7		1.26741	43592.5
0.0146096	0.00145853		1.18091	91914.6		1.26747	43595.2
0.0146778	0.00145965		1.18098	91941.6		1.26754	43598.4
0.0147461	0.00146076		1.18105	91955.8		1.26761	43601.3
0.0148144	0.00146186		1.18112	91964		1.26768	43601
0.0148827	0.00146295		1.18118	91963.9		1.26775	43602.7
0.0149509	0.00146402		1.18125	91963.2		1.26782	43606.7
0.0150192	0.00146508		1.18132	91987.9		1.26788	43607.8
0.0150875	0.00146613		1.18139	92000.6		1.26795	43609.1
0.0151557	0.00146717		1.18146	91984.5		1.26802	43612.8
0.015224	0.0014682		1.18153	91989.9		1.26809	43614.1
0.0152923	0.00146922		1.18159	92010.6		1.26816	43615.8
0.0153605	0.00147022		1.18166	92029.7		1.26822	43617.6
0.0154288	0.00147121		1.18173	92038.9		1.26829	43619
0.0154971	0.0014722		1.1818	92033.9		1.26836	43622.7
0.0155653	0.00147317		1.18187	92042.2		1.26843	43624.9
0.0156336	0.00147413		1.18194	92074		1.2685	43624.9
0.0157019	0.00147508		1.182	92077		1.26857	43617.5
0.0157701	0.00147602		1.18207	92049.8		1.26863	43610.5
0.0158384	0.00147695		1.18214	92050.4		1.2687	43611.2
0.0159067	0.00147786		1.18221	92064.6		1.26877	43611
0.0159749	0.00147877		1.18228	92067.5		1.26884	43606.5
0.0160432	0.00147967		1.18235	92070.9		1.26891	43599.7
0.0161115	0.00148055		1.18241	92067.2		1.26898	43597.7
0.0161797	0.00148143		1.18248	92075.3		1.26904	43598.4
0.016248	0.0014823		1.18255	92098.2		1.26911	43598.9
0.0163163	0.00148315		1.18262	92126		1.26918	43600.2
0.0163845	0.001484		1.18269	92124.6		1.26925	43602.9
0.0164528	0.00148483		1.18276	92125.9		1.26932	43604.1
0.0165211	0.00148566		1.18282	92117.7		1.26939	43606
0.0165893	0.00148647		1.18289	92092.8		1.26945	43609.3
0.0166576	0.00148728		1.18296	92122.1		1.26952	43612.3
0.0167259	0.00148807		1.18303	92153.9		1.26959	43612.8
0.0167941	0.00148886		1.1831	92186.2		1.26966	43613.1
0.0168624	0.00148964		1.18317	92177		1.26973	43615.4
0.0169307	0.00149041		1.18323	92169.8		1.2698	43616.5
0.0169989	0.00149117		1.1833	92165		1.26986	43617
0.0170672	0.00149191		1.18337	92177.7		1.26993	43619.2
0.0171355	0.00149265		1.18344	92186.2		1.27	43619.7
0.0172037	0.00149338		1.18351	92195.3		1.27007	43620
0.017272	0.0014941		1.18357	92203.4		1.27014	43621.8
0.0173403	0.00149482		1.18364	92187.9		1.27021	43621.7
0.0174085	0.00149552		1.18371	92187.9		1.27027	43624.2
0.0174768	0.00149621		1.18378	92198.5		1.27034	43626.3
0.0175451	0.0014969		1.18385	92214.8		1.27041	43626.9
0.0176133	0.00149758		1.18392	92220.6		1.27048	43629.2
0.0176816	0.00149825		1.18398	92220.4		1.27055	43630.7
0.0177499	0.00149891		1.18405	92212.2		1.27062	43631
0.0178181	0.00149956		1.18412	92206.1		1.27068	43631.6
0.0178864	0.0015002		1.18419	92215.4		1.27075	43631.8
0.0179547	0.00150083		1.18426	92228.6		1.27082	43632.7
0.0180229	0.00150146		1.18433	92241		1.27089	43632.9
0.0180912	0.00150208		1.18439	92239.3		1.27096	43632.7
0.0181595	0.00150268		1.18446	92241.9		1.27102	43633.5
0.0182277	0.00150329		1.18453	92246.1		1.27109	43634.4
0.018296	0.00150388		1.1846	92249.3		1.27116	43635.6
0.0183643	0.00150446		1.18467	92250.2		1.27123	43637
0.0184325	0.00150504		1.18474	92252.1		1.2713	43637.5
0.0185008	0.00150561		1.1848	92254		1.27137	43638.7
0.0185691	0.00150617		1.18487	92261.2		1.27143	43639.5
0.0186373	0.00150672		1.18494	92267.5		1.2715	43640.8
0.0187056	0.00150727		1.18501	92276.9		1.27157	43641.5
0.0187739	0.00150781		1.18508	92274.8		1.27164	43641.5
0.0188421	0.00150834		1.18514	92272.6		1.27171	43642.1
0.0189104	0.00150886		1.18521	92270.3		1.27178	43643.1
0.0189787	0.00150937		1.18528	92272.9		1.27184	43643.6
0.0190469	0.00150988		1.18535	92277.2		1.27191	43645.1
0.0191152	0.00151038		1.18542	92272.9		1.27198	43645.5
0.0191835	0.00151088		1.18549	92276.5		1.27205	43646.8
0.0192517	0.00151136		1.18555	92288.2		1.27212	43647
0.01932	0.00151184		1.18562	92289.1		1.27218	43647.7
0.0193883	0.00151231		1.18569	92289		1.27225	43649.5
0.0194565	0.00151278		1.18576	92286.9		1.27232	43650.1
0.0195248	0.00151323		1.18583	92297.9		1.27239	43650.5
0.0195931	0.00151368		1.1859	92301.7		1.27246	43649.6
0.0196613	0.00151413		1.18596	92296.9		1.27253	43642.8
0.0197296	0.00151456		1.18603	92293.4		1.27259	43634.3
0.0197979	0.00151499		1.1861	92299.2		1.27266	43632.2
0.0198661	0.00151542		1.18617	92309.8		1.27273	43633.6
0.0199344	0.00151583		1.18624	92311.5		1.2728	43635
0.0200027	0.00151624		1.1863	92298.7		1.27287	43635
0.0200709	0.00151665		1.18637	92302		1.27294	43635.4
0.0201392	0.00151704		1.18644	92318		1.273	43636.2
0.0202075	0.00151743		1.18651	92306.1		1.27307	43636
0.0202757	0.00151782		1.18658	92303.9		1.27314	43636
0.020344	0.00151819		1.18665	92305.2		1.27321	43636.2
0.0204123	0.00151856		1.18671	92294.5		1.27328	43637.6
0.0204805	0.00151893		1.18678	92302.1		1.27334	43639.3
0.0205488	0.00151929		1.18685	92282.3		1.27341	43640.9
0.0206171	0.00151964		1.18692	92277.6		1.27348	43640.8
0.0206853	0.00151999		1.18699	92309.4		1.27355	43640.2
0.0207536	0.00152033		1.18706	92322.1		1.27362	43641.5
0.0208219	0.00152066		1.18712	92302.9		1.27369	43643.4
0.0208901	0.00152099		1.18719	92289.2		1.27375	43643.6
0.0209584	0.00152132		1.18726	92307.5		1.27382	43643.5
0.0210267	0.00152163		1.18733	92301		1.27389	43644.1
0.0210949	0.00152194		1.1874	92299.9		1.27396	43644.3
0.0211632	0.00152225		1.18747	92308.8		1.27403	43644.9
0.0212315	0.00152255		1.18753	92291.4		1.2741	43644.1
0.0212997	0.00152285		1.1876	92280.1		1.27416	43644.1
0.021368	0.00152313		1.18767	92260.9		1.27423	43644.2
0.0214363	0.00152342		1.18774	92245.8		1.2743	43643.9
0.0215045	0.0015237		1.18781	92253.7		1.27437	43643.8
0.0215728	0.00152397		1.18788	92261.4		1.27444	43643.8
0.0216411	0.00152424		1.18794	92283		1.27451	43644.3
0.0217093	0.0015245		1.18801	92293.6		1.27457	43645.5
0.0217776	0.00152475		1.18808	92256.5		1.27464	43644.4
0.0218459	0.00152501		1.18815	92249.2		1.27471	43643.5
0.0219141	0.00152525		1.18822	92267.8		1.27478	43644.6
0.0219824	0.00152549		1.18829	92268.3		1.27485	43644.2
0.0220507	0.00152573		1.18835	92232.1		1.27492	43643.7
0.0221189	0.00152596		1.18842	92218.8		1.27498	43644.1
0.0221872	0.00152619		1.18849	92232.2		1.27505	43644.6
0.0222555	0.00152641		1.18856	92233.7		1.27512	43644.3
0.0223237	0.00152663		1.18863	92245.3		1.27519	43643.4
0.022392	0.00152684		1.18869	92250.5		1.27526	43642.1
0.0224603	0.00152705		1.18876	92240.7		1.27533	43641.4
0.0225285	0.00152725		1.18883	92222.1		1.27539	43641.3
0.0225968	0.00152745		1.1889	92196.5		1.27546	43640.9
0.0226651	0.00152764		1.18897	92181.9		1.27553	43631.3
0.0227333	0.00152783		1.18904	92194.2		1.2756	43621.4
0.0228016	0.00152801		1.1891	92213.6		1.27567	43622.2
0.0228699	0.00152819		1.18917	92213.3		1.27574	43623.2
0.0229381	0.00152837		1.18924	92204.3		1.2758	43622.2
0.0230064	0.00152854		1.18931	92211.4		1.27587	43620.4
0.0230747	0.0015287		1.18938	92197.8		1.27594	43619.4
0.0231429	0.00152887		1.18945	92167.7		1.27601	43619.3
0.0232112	0.00152903		1.18951	92164.8		1.27608	43619.1
0.0232795	0.00152918		1.18958	92165.8		1.27614	43618.8
0.0233477	0.00152933		1.18965	92175.8		1.27621	43617.3
0.023416	0.00152947		1.18972	92180.6		1.27628	43615.5
0.0234843	0.00152962		1.18979	92181.1		1.27635	43615.7
0.0235525	0.00152975		1.18986	92166.8		1.27642	43615.5
0.0236208	0.00152988		1.18992	92136		1.27649	43613.8
0.0236891	0.00153001		1.18999	92130.3		1.27655	43612.9
0.0237573	0.00153014		1.19006	92163.2		1.27662	43612.9
0.0238256	0.00153026		1.19013	92159.7		1.27669	43612.5
0.0238939	0.00153038		1.1902	92102.9		1.27676	43611.5
0.0239621	0.00153049		1.19026	92089.3		1.27683	43609.9
0.0240304	0.0015306		1.19033	92079.8		1.27689	43608.3
0.0240987	0.00153071		1.1904	92084.6		1.27696	43607.5
0.0241669	0.00153081		1.19047	92087.9		1.27703	43605.7
0.0242352	0.00153091		1.19054	92063.1		1.2771	43604.9
0.0243035	0.00153101		1.19061	92056.9		1.27717	43604.3
0.0243717	0.0015311		1.19067	92055.5		1.27724	43603.6
0.02444	0.00153119		1.19074	92041.2		1.2773	43603
0.0245083	0.00153127		1.19081	92014.9		1.27737	43600
0.0245765	0.00153135		1.19088	92009.7		1.27744	43598
0.0246448	0.00153143		1.19095	92018.5		1.27751	43597.7
0.0247131	0.0015315		1.19102	92010.1		1.27758	43596.6
0.0247813	0.00153157		1.19108	92002.4		1.27765	43595.3
0.0248496	0.00153164		1.19115	91987.9		1.27771	43595.3
0.0249179	0.00153171		1.19122	91983.6		1.27778	43598.2
0.0249861	0.00153177		1.19129	91989.7		1.27785	43603.3
0.0250544	0.00153182		1.19136	91964.1		1.27792	43605
0.0251227	0.00153188		1.19142	91949.4		1.27799	43604.5
0.0251909	0.00153193		1.19149	91954.8		1.27806	43603.5
0.0252592	0.00153198		1.19156	91947.5		1.27812	43601.3
0.0253275	0.00153202		1.19163	91945.6		1.27819	43600.7
0.0253957	0.00153206		1.1917	91936.8		1.27826	43599.7
0.025464	0.0015321		1.19177	91918.6		1.27833	43597.3
0.0255323	0.00153214		1.19183	91900.9		1.2784	43595.8
0.0256005	0.00153217		1.1919	91869.1		1.27846	43595.1
0.0256688	0.0015322		1.19197	91848.6		1.27853	43592.2
0.0257371	0.00153223		1.19204	91854		1.2786	43589.3
0.0258053	0.00153225		1.19211	91865.4		1.27867	43588.7
0.0258736	0.00153227		1.19218	91857.9		1.27874	43587.2
0.0259419	0.00153229		1.19224	91843		1.27881	43585.6
0.0260101	0.00153231		1.19231	91843.2		1.27887	43583.1
0.0260784	0.00153232		1.19238	91829.6		1.27894	43580.7
0.0261467	0.00153233		1.19245	91825.1		1.27901	43579.2
0.0262149	0.00153233		1.19252	91818.8		1.27908	43578
0.0262832	0.00153234		1.19259	91792.9		1.27915	43576.2
0.0263515	0.00153234		1.19265	91793.6		1.27922	43574.3
0.0264197	0.00153234		1.19272	91786.4		1.27929	43571.9
0.026488	0.00153233		1.19279	91762.2		1.27935	43568.9
0.0265563	0.00153232		1.19286	91756.6		1.27942	43568.4
0.0266245	0.00153232		1.19293	91731.8		1.27949	43566.8
0.0266928	0.0015323		1.193	91689		1.27956	43564.6
0.0267611	0.00153229		1.19306	91686		1.27963	43561.5
0.0268293	0.00153227		1.19313	91675.4		1.27969	43558.3
0.0268976	0.00153225		1.1932	91658		1.27976	43556.8
0.0269659	0.00153223		1.19327	91659.5		1.27983	43555.4
0.0270341	0.0015322		1.19334	91653.9		1.2799	43553.2
0.0271024	0.00153217		1.19341	91630.4		1.27997	43550.8
0.0271707	0.00153214		1.19347	91587.4		1.28004	43548.5
0.0272389	0.00153211		1.19354	91565		1.2801	43546.5
0.0273072	0.00153208		1.19361	91581.4		1.28017	43544
0.0273755	0.00153204		1.19368	91582.2		1.28024	43541.2
0.0274437	0.001532		1.19375	91576.1		1.28031	43538.1
0.027512	0.00153196		1.19381	91562.4		1.28038	43535.2
0.0275803	0.00153191		1.19388	91529.8		1.28045	43533.9
0.0276485	0.00153187		1.19395	91512.5		1.28051	43531.5
0.0277168	0.00153182		1.19402	91474.6		1.28058	43528.3
0.0277851	0.00153177		1.19409	91461.6		1.28065	43525.6
0.0278533	0.00153171		1.19416	91451.6		1.28072	43522.8
0.0279216	0.00153166		1.19422	91444.4		1.28079	43520.6
0.0279899	0.0015316		1.19429	91431.6		1.28086	43518.6
0.0280581	0.00153154		1.19436	91419.9		1.28092	43516.1
0.0281264	0.00153147		1.19443	91398		1.28099	43512.3
0.0281947	0.00153141		1.1945	91361.6		1.28106	43508.5
0.0282629	0.00153134		1.19457	91353.2		1.28113	43506.5
0.0283312	0.00153127		1.19463	91344.1		1.2812	43515.7
0.0283995	0.0015312		1.1947	91319.5		1.28126	43523
0.0284677	0.00153112		1.19477	91304.9		1.28133	43521.2
0.028536	0.00153105		1.19484	91280.8		1.2814	43518.2
0.0286043	0.00153097		1.19491	91260.8		1.28147	43515.1
0.0286725	0.00153089		1.19497	91260		1.28154	43511.4
0.0287408	0.00153081		1.19504	91233.1		1.28161	43508.6
0.0288091	0.00153072		1.19511	91204.8		1.28167	43506.3
0.0288773	0.00153063		1.19518	91198.5		1.28174	43502.6
0.0289456	0.00153054		1.19525	91170.9		1.28181	43499.2
0.0290139	0.00153045		1.19532	91163.8		1.28188	43495.1
0.0290821	0.00153036		1.19538	91150.9		1.28195	43490.3
0.0291504	0.00153027		1.19545	91121.7		1.28201	43486.9
0.0292187	0.00153017		1.19552	91102		1.28208	43482.9
0.0292869	0.00153007		1.19559	91096.6		1.28215	43480.2
0.0293552	0.00152997		1.19566	91078.4		1.28222	43478
0.0294235	0.00152986		1.19573	91055.3		1.28229	43473.7
0.0294918	0.00152976		1.19579	91018.7		1.28236	43470.4
0.02956	0.00152965		1.19586	90980.2		1.28242	43467.8
0.0296283	0.00152954		1.19593	90994.3		1.28249	43465
0.0296966	0.00152943		1.196	90981.9		1.28256	43461.6
0.0297648	0.00152932		1.19607	90937.6		1.28263	43457
0.0298331	0.0015292		1.19614	90906.8		1.2827	43454.8
0.0299014	0.00152909		1.1962	90902.6		1.28277	43449.6
0.0299696	0.00152897		1.19627	90872.9		1.28283	43444.3
0.0300379	0.00152885		1.19634	90838.3		1.2829	43440.9
0.0301062	0.00152873		1.19641	90828.6		1.28297	43437.4
0.0301744	0.0015286		1.19648	90814.6		1.28304	43434.2
0.0302427	0.00152848		1.19654	90805.5		1.28311	43430
0.030311	0.00152835		1.19661	90784.1		1.28318	43424.6
0.0303792	0.00152822		1.19668	90743.3		1.28324	43419.9
0.0304475	0.00152808		1.19675	90725.3		1.28331	43416.2
0.0305158	0.00152795		1.19682	90693.4		1.28338	43412.2
0.030584	0.00152782		1.19689	90652.8		1.28345	43408.1
0.0306523	0.00152768		1.19695	90645.8		1.28352	43403.6
0.0307206	0.00152754		1.19702	90620.4		1.28358	43399.2
0.0307888	0.0015274		1.19709	90587.3		1.28365	43395.5
0.0308571	0.00152726		1.19716	90562.2		1.28372	43390.7
0.0309254	0.00152711		1.19723	90531.9		1.28379	43385.7
0.0309936	0.00152697		1.1973	90520.9		1.28386	43380.9
0.0310619	0.00152682		1.19736	90506.4		1.28393	43377.5
0.0311302	0.00152667		1.19743	90459.2		1.28399	43373.6
0.0311984	0.00152652		1.1975	90441.6		1.28406	43368.5
0.0312667	0.00152637		1.19757	90436.6		1.28413	43362.9
0.031335	0.00152622		1.19764	90397.5		1.2842	43357.3
0.0314032	0.00152606		1.19771	90374.7		1.28427	43352
0.0314715	0.0015259		1.19777	90355.5		1.28434	43348
0.0315398	0.00152574		1.19784	90331.1		1.28441	43343.2
0.031608	0.00152558		1.19791	90310		1.28447	43338.5
0.0316763	0.00152542		1.19798	90274.5		1.28454	43335.4
0.0317446	0.00152526		1.19805	90252.1		1.28461	43328
0.0318128	0.00152509		1.19812	90231.4		1.28468	43322.8
0.0318811	0.00152493		1.19818	90188.7		1.28475	43317.8
0.0319494	0.00152476		1.19825	90152.2		1.28481	43313.2
0.0320176	0.00152459		1.19832	90128.5		1.28488	43315.9
0.0320859	0.00152442		1.19839	90116.2		1.28495	43320.6
0.0321542	0.00152425		1.19846	90092.5		1.28502	43318.9
0.0322224	0.00152407		1.19853	90047.7		1.28509	43316.5
0.0322907	0.0015239		1.19859	90005.7		1.28516	43320.7
0.032359	0.00152372		1.19866	89979.9		1.28522	43321.6
0.0324272	0.00152354		1.19873	89951.8		1.28529	43315.4
0.0324955	0.00152336		1.1988	89905.4		1.28536	43309.3
0.0325638	0.00152318		1.19887	89867.3		1.28543	43304.9
0.032632	0.001523		1.19893	89855.8		1.2855	43299.5
0.0327003	0.00152282		1.199	89842.9		1.28557	43292.8
0.0327686	0.00152263		1.19907	89805.3		1.28563	43287
0.0328368	0.00152245		1.19914	89776.9		1.2857	43281.1
0.0329051	0.00152226		1.19921	89774		1.28577	43275.7
0.0329734	0.00152207		1.19928	89725.8		1.28584	43269.2
0.0330416	0.00152188		1.19934	89671.5		1.28591	43263.5
0.0331099	0.00152169		1.19941	89670.6		1.28598	43257.2
0.0331782	0.0015215		1.19948	89643		1.28604	43250.8
0.0332464	0.0015213		1.19955	89586.7		1.28611	43246
0.0333147	0.00152111		1.19962	89554.3		1.28618	43238.2
0.033383	0.00152091		1.19968	89529.1		1.28625	43231.1
0.0334512	0.00152071		1.19975	89508.5		1.28632	43226.5
0.0335195	0.00152052		1.19982	89464		1.28638	43219.2
0.0335878	0.00152032		1.19989	89420.8		1.28645	43212.3
0.033656	0.00152012		1.19996	89391.3		1.28652	43206.3
0.0337243	0.00151992		1.20003	89358		1.28659	43198.7
0.0337926	0.00151971		1.20009	89332.6		1.28666	43193.6
0.0338608	0.00151951		1.20016	89291.3		1.28673	43187.3
0.0339291	0.00151931		1.20023	89247.1		1.28679	43180.1
0.0339974	0.0015191		1.2003	89217.4		1.28686	43172.9
0.0340656	0.00151889		1.20037	89173.9		1.28693	43164.1
0.0341339	0.00151869		1.20044	89128.6		1.287	43156.9
0.0342022	0.00151848		1.2005	89043.7		1.28707	43150.8
0.0342704	0.00151827					1.28713	43144.4
0.0343387	0.00151806					1.2872	43138.5
0.034407	0.00151785					1.28727	43130.7
0.0344752	0.00151764					1.28734	43123.4
0.0345435	0.00151743					1.28741	43117.1
0.0346118	0.00151721					1.28748	43110.1
0.03468	0.001517					1.28754	43102.3
0.0347483	0.00151678					1.28761	43094
0.0348166	0.00151657					1.28768	43085.6
0.0348848	0.00151635					1.28775	43078
0.0349531	0.00151614					1.28782	43070.3
0.0350214	0.00151592					1.28789	43064.3
0.0350896	0.0015157					1.28795	43056.2
0.0351579	0.00151548					1.28802	43047.7
0.0352262	0.00151526					1.28809	43040.1
0.0352944	0.00151504					1.28816	43031.4
0.0353627	0.00151482					1.28823	43024.3
0.035431	0.0015146					1.2883	43017
0.0354992	0.00151438					1.28836	43008.5
0.0355675	0.00151415					1.28843	43001.8
0.0356358	0.00151393					1.2885	42992.5
0.035704	0.00151371					1.28857	42985.1
0.0357723	0.00151348					1.28864	42978.2
0.0358406	0.00151326					1.2887	42969.1
0.0359088	0.00151304					1.28877	42959.8
0.0359771	0.00151281					1.28884	42951.9
0.0360454	0.00151259					1.28891	42944
0.0361136	0.00151236					1.28898	42936
0.0361819	0.00151213					1.28905	42926.3
0.0362502	0.00151191					1.28912	42917.9
0.0363184	0.00151168					1.28918	42910.1
0.0363867	0.00151145					1.28925	42900.5
0.036455	0.00151122					1.28932	42891.6
0.0365232	0.001511					1.28939	42882
0.0365915	0.00151077					1.28946	42871.8
0.0366598	0.00151054					1.28953	42864.6
0.036728	0.00151031					1.28959	42856.9
0.0367963	0.00151008					1.28966	42847.4
0.0368646	0.00150985					1.28973	42836.4
0.0369328	0.00150962					1.2898	42826.8
0.0370011	0.0015094					1.28987	42820.3
0.0370694	0.00150917					1.28993	42811
0.0371376	0.00150894					1.29	42799.4
0.0372059	0.00150871					1.29007	42791.4
0.0372742	0.00150848					1.29014	42780.8
0.0373424	0.00150825					1.29021	42769.9
0.0374107	0.00150802					1.29028	42762
0.037479	0.00150779					1.29034	42753.8
0.0375472	0.00150756					1.29041	42745.3
0.0376155	0.00150733					1.29048	42734.3
0.0376838	0.0015071					1.29055	42725.6
0.037752	0.00150687					1.29062	42717.3
0.0378203	0.00150664					1.29069	42706.5
0.0378886	0.00150641					1.29075	42697
0.0379568	0.00150618					1.29082	42688.7
0.0380251	0.00150595					1.29089	42679.9
0.0380934	0.00150572					1.29096	42670.9
0.0381616	0.00150549					1.29103	42661.2
0.0382299	0.00150526					1.2911	42653.1
0.0382982	0.00150503					1.29116	42643.1
0.0383664	0.0015048					1.29123	42632.6
0.0384347	0.00150457					1.2913	42623.7
0.038503	0.00150434					1.29137	42613.8
0.0385712	0.00150411					1.29144	42603
0.0386395	0.00150388					1.2915	42593.1
0.0387078	0.00150366					1.29157	42582.3
0.038776	0.00150343					1.29164	42574
0.0388443	0.0015032					1.29171	42563.7
0.0389126	0.00150297					1.29178	42552.9
0.0389808	0.00150274					1.29185	42543.7
0.0390491	0.00150251					1.29191	42530.6
0.0391174	0.00150228					1.29198	42517.2
0.0391856	0.00150206					1.29205	42508.8
0.0392539	0.00150183					1.29212	42497.5
0.0393222	0.0015016					1.29219	42488.1
0.0393904	0.00150138					1.29225	42476.3
0.0394587	0.00150115					1.29232	42464.2
0.039527	0.00150092					1.29239	42453.9
0.0395952	0.0015007					1.29246	42442.3
0.0396635	0.00150047					1.29253	42432.1
0.0397318	0.00150024					1.2926	42419.9
0.0398	0.00150002					1.29266	42407.1
0.0398683	0.00149979					1.29273	42396.2
0.0399366	0.00149957					1.2928	42384.1
0.0400048	0.00149934					1.29287	42372.2
0.0400731	0.00149912					1.29294	42360.3
0.0401414	0.00149889					1.29301	42348.3
0.0402096	0.00149867					1.29307	42337.7
0.0402779	0.00149844					1.29314	42324.7
0.0403462	0.00149822					1.29321	42311.8
0.0404144	0.001498					1.29328	42301.5
0.0404827	0.00149777					1.29335	42287.1
0.040551	0.00149755					1.29342	42276.5
0.0406192	0.00149733					1.29348	42263.8
0.0406875	0.0014971					1.29355	42249.5
0.0407558	0.00149688					1.29362	42237.8
0.040824	0.00149666					1.29369	42223.9
0.0408923	0.00149644					1.29376	42211.1
0.0409606	0.00149621					1.29383	42200.2
0.0410288	0.00149599					1.29389	42187.1
0.0410971	0.00149577					1.29396	42173.9
0.0411654	0.00149555					1.29403	42163.7
0.0412336	0.00149533					1.2941	42150
0.0413019	0.00149511					1.29417	42136.4
0.0413702	0.00149489					1.29424	42122.7
0.0414384	0.00149467					1.2943	42110.8
0.0415067	0.00149445					1.29437	42098.8
0.041575	0.00149423					1.29444	42084.1
0.0416432	0.00149401					1.29451	42072.8
0.0417115	0.00149379					1.29458	42061.6
0.0417798	0.00149357					1.29465	42047.6
0.041848	0.00149335					1.29471	42035.2
0.0419163	0.00149314					1.29478	42022.1
0.0419846	0.00149292					1.29485	42008.1
0.0420528	0.0014927					1.29492	41994.2
0.0421211	0.00149248					1.29499	41981.8
0.0421894	0.00149226					1.29505	41970.8
0.0422576	0.00149205					1.29512	41956.2
0.0423259	0.00149183					1.29519	41941.5
0.0423942	0.00149161					1.29526	41931.4
0.0424624	0.0014914					1.29533	41916.5
0.0425307	0.00149118					1.2954	41903.1
0.042599	0.00149096					1.29546	41889.3
0.0426672	0.00149075					1.29553	41874.8
0.0427355	0.00149053					1.2956	41861
0.0428038	0.00149032					1.29567	41845.7
0.042872	0.0014901					1.29574	41832.1
0.0429403	0.00148989					1.29581	41820.4
0.0430086	0.00148967					1.29587	41806.5
0.0430768	0.00148946					1.29594	41792.4
0.0431451	0.00148924					1.29601	41778.8
0.0432134	0.00148903					1.29608	41763.9
0.0432816	0.00148882					1.29615	41750.2
0.0433499	0.0014886					1.29621	41733.7
0.0434182	0.00148839					1.29628	41718.9
0.0434864	0.00148818					1.29635	41705.1
0.0435547	0.00148796					1.29642	41690.6
0.043623	0.00148775					1.29649	41677.7
0.0436912	0.00148754					1.29656	41662.9
0.0437595	0.00148733					1.29662	41648.8
0.0438278	0.00148712					1.29669	41633.4
0.043896	0.0014869					1.29676	41627.3
0.0439643	0.00148669					1.29683	41639.6
0.0440326	0.00148648					1.2969	41642.2
0.0441008	0.00148627					1.29697	41628.8
0.0441691	0.00148606					1.29703	41615
0.0442374	0.00148585					1.2971	41599.1
0.0443057	0.00148564					1.29717	41581.8
0.0443739	0.00148543					1.29724	41568.2
0.0444422	0.00148522					1.29731	41553.5
0.0445105	0.00148501					1.29737	41539.3
0.0445787	0.0014848					1.29744	41519.9
0.044647	0.00148459					1.29751	41503.5
0.0447153	0.00148438					1.29758	41490
0.0447835	0.00148417					1.29765	41470.2
0.0448518	0.00148397					1.29772	41454.9
0.0449201	0.00148376					1.29778	41441.7
0.0449883	0.00148355					1.29785	41425
0.0450566	0.00148334					1.29792	41408.7
0.0451249	0.00148313					1.29799	41390.8
0.0451931	0.00148293					1.29806	41374
0.0452614	0.00148272					1.29813	41358
0.0453297	0.00148251					1.29819	41340.7
0.0453979	0.00148231					1.29826	41323.8
0.0454662	0.0014821					1.29833	41306.7
0.0455345	0.0014819					1.2984	41289.2
0.0456027	0.00148169					1.29847	41272.4
0.045671	0.00148148					1.29854	41255.9
0.0457393	0.00148128					1.2986	41242.6
0.0458075	0.00148107					1.29867	41224.3
0.0458758	0.00148087					1.29874	41204.9
0.0459441	0.00148067					1.29881	41189.3
0.0460123	0.00148046					1.29888	41171.1
0.0460806	0.00148026					1.29895	41153.4
0.0461489	0.00148006					1.29901	41137.6
0.0462171	0.00147985					1.29908	41118.5
0.0462854	0.00147965					1.29915	41101.4
0.0463537	0.00147945					1.29922	41084.3
0.0464219	0.00147924					1.29929	41068.7
0.0464902	0.00147904					1.29936	41055.4
0.0465585	0.00147884					1.29942	41042.6
0.0466267	0.00147864					1.29949	41027.6
0.046695	0.00147844					1.29956	41011
0.0467633	0.00147824					1.29963	40993
0.0468315	0.00147804					1.2997	40975.5
0.0468998	0.00147784					1.29977	40957.3
0.0469681	0.00147764					1.29983	40939.5
0.0470363	0.00147744					1.2999	40921.8
0.0471046	0.00147724					1.29997	40901.6
0.0471729	0.00147704					1.30004	40885.1
0.0472411	0.00147684					1.30011	40867.6
0.0473094	0.00147664					1.30017	40848
0.0473777	0.00147645					1.30024	40831.3
0.0474459	0.00147625					1.30031	40812.6
0.0475142	0.00147605					1.30038	40794.9
0.0475825	0.00147586					1.30045	40776.2
0.0476507	0.00147566					1.30052	40755.2
0.047719	0.00147546					1.30058	40741.9
0.0477873	0.00147527					1.30065	40733.3
0.0478555	0.00147507					1.30072	40717.9
0.0479238	0.00147488					1.30079	40701.3
0.0479921	0.00147468					1.30086	40681.5
0.0480603	0.00147448					1.30093	40662.4
0.0481286	0.00147429					1.30099	40646.3
0.0481969	0.0014741					1.30106	40633
0.0482651	0.0014739					1.30113	40622
0.0483334	0.00147371					1.3012	40602.2
0.0484017	0.00147352					1.30127	40583.8
0.0484699	0.00147332					1.30133	40568.8
0.0485382	0.00147313					1.3014	40562.7
0.0486065	0.00147294					1.30147	40554.2
0.0486747	0.00147275					1.30154	40535.2
0.048743	0.00147256					1.30161	40515.4
0.0488113	0.00147236					1.30168	40498
0.0488795	0.00147217					1.30174	40478.3
0.0489478	0.00147198					1.30181	40460.2
0.0490161	0.00147179					1.30188	40441.6
0.0490843	0.0014716					1.30195	40420.6
0.0491526	0.00147141					1.30202	40401.9
0.0492209	0.00147122					1.30209	40382.1
0.0492891	0.00147103					1.30215	40361.1
0.0493574	0.00147084					1.30222	40344
0.0494257	0.00147065					1.30229	40324.6
0.0494939	0.00147047					1.30236	40305.2
0.0495622	0.00147028					1.30243	40284.6
0.0496305	0.00147009					1.30249	40263.6
0.0496987	0.0014699					1.30256	40247.1
0.049767	0.00146971					1.30263	40226
0.0498353	0.00146953					1.3027	40202
0.0499035	0.00146934					1.30277	40183
0.0499718	0.00146915					1.30284	40162.2
0.0500401	0.00146897					1.3029	40134.1
0.0501083	0.00146878
0.0501766	0.00146859
0.0502449	0.00146841
0.0503131	0.00146822
0.0503814	0.00146803
0.0504497	0.00146785
0.0505179	0.00146766
0.0505862	0.00146748
0.0506545	0.00146729
0.0507227	0.00146711
0.050791	0.00146692
0.0508593	0.00146674
0.0509275	0.00146655
0.0509958	0.00146637
0.0510641	0.00146618
0.0511323	0.001466
0.0512006	0.00146581
0.0512689	0.00146563
0.0513371	0.00146544
0.0514054	0.00146526
0.0514737	0.00146507
0.0515419	0.00146489
0.0516102	0.0014647
0.0516785	0.00146452
0.0517467	0.00146433
0.051815	0.00146415
0.0518833	0.00146396
0.0519515	0.00146378
0.0520198	0.00146359
0.0520881	0.00146341
0.0521563	0.00146322
0.0522246	0.00146304
0.0522929	0.00146285
0.0523611	0.00146266
0.0524294	0.00146248
0.0524977	0.00146229
0.0525659	0.00146211
0.0526342	0.00146192
0.0527025	0.00146173
0.0527707	0.00146155
0.052839	0.00146136
0.0529073	0.00146117
0.0529755	0.00146098
0.0530438	0.0014608
0.0531121	0.00146061
0.0531803	0.00146042
0.0532486	0.00146023
0.0533169	0.00146004
0.0533851	0.00145985
0.0534534	0.00145966
0.0535217	0.00145947
0.0535899	0.00145928
0.0536582	0.00145909
0.0537265	0.0014589
0.0537947	0.00145871
0.053863	0.00145852
0.0539313	0.00145832
0.0539995	0.00145813
0.0540678	0.00145794
0.0541361	0.00145775
0.0542043	0.00145755
0.0542726	0.00145736
0.0543409	0.00145716
0.0544091	0.00145696
0.0544774	0.00145677
0.0545457	0.00145657
0.0546139	0.00145637
0.0546822	0.00145618
0.0547505	0.00145598
0.0548187	0.00145578
0.054887	0.00145558
0.0549553	0.00145538
0.0550235	0.00145518
0.0550918	0.00145498
0.0551601	0.00145478
0.0552283	0.00145458
0.0552966	0.00145437
0.0553649	0.00145417
0.0554331	0.00145397
0.0555014	0.00145376
0.0555697	0.00145355
0.0556379	0.00145334
0.0557062	0.00145313
0.0557745	0.00145291
0.0558427	0.0014527
0.055911	0.00145249
0.0559793	0.00145227
0.0560475	0.00145206
0.0561158	0.00145184
0.0561841	0.00145163
0.0562523	0.00145141
0.0563206	0.00145119
0.0563889	0.00145097
0.0564571	0.00145075
0.0565254	0.00145053
0.0565937	0.00145031
0.0566619	0.00145009
0.0567302	0.00144987
0.0567985	0.00144965
0.0568667	0.00144943
0.056935	0.0014492
0.0570033	0.00144898
0.0570715	0.00144875
0.0571398	0.00144853
0.0572081	0.0014483
0.0572763	0.00144808
0.0573446	0.00144785
0.0574129	0.00144762
0.0574811	0.00144739
0.0575494	0.00144717
0.0576177	0.00144694
0.0576859	0.00144671
0.0577542	0.00144648
0.0578225	0.00144624
0.0578907	0.00144601
0.057959	0.00144578
0.0580273	0.00144554
0.0580955	0.00144531
0.0581638	0.00144508
0.0582321	0.00144484
0.0583003	0.00144461
0.0583686	0.00144437
0.0584369	0.00144413
0.0585051	0.00144389
0.0585734	0.00144365
0.0586417	0.00144341
0.0587099	0.00144318
0.0587782	0.00144294
0.0588465	0.00144269
0.0589148	0.00144245
0.058983	0.00144221
0.0590513	0.00144197
0.0591196	0.00144173
0.0591878	0.00144148
0.0592561	0.00144124
0.0593244	0.00144099
0.0593926	0.00144075
0.0594609	0.0014405
0.0595292	0.00144025
0.0595974	0.00144001
0.0596657	0.00143976
0.059734	0.00143951
0.0598022	0.00143926
0.0598705	0.00143901
0.0599388	0.00143876
0.060007	0.00143851
0.0600753	0.00143826
0.0601436	0.00143801
0.0602118	0.00143776
0.0602801	0.00143751
0.0603484	0.00143726
0.0604166	0.001437
0.0604849	0.00143675
0.0605532	0.0014365
0.0606214	0.00143624
0.0606897	0.00143599
0.060758	0.00143573
0.0608262	0.00143548
0.0608945	0.00143522
0.0609628	0.00143497
0.061031	0.00143471
0.0610993	0.00143445
0.0611676	0.0014342
0.0612358	0.00143394
0.0613041	0.00143368
0.0613724	0.00143342
0.0614406	0.00143316
0.0615089	0.0014329
0.0615772	0.00143264
0.0616454	0.00143238
0.0617137	0.00143213
0.061782	0.00143187
0.0618502	0.0014316
0.0619185	0.00143134
0.0619868	0.00143108
0.062055	0.00143082
0.0621233	0.00143056
0.0621916	0.0014303
0.0622598	0.00143004
0.0623281	0.00142977
0.0623964	0.00142951
0.0624646	0.00142925
0.0625329	0.00142899
0.0626012	0.00142872
0.0626694	0.00142846
0.0627377	0.00142819
0.062806	0.00142793
0.0628742	0.00142767
0.0629425	0.0014274
0.0630108	0.00142714
0.063079	0.00142687
0.0631473	0.00142661
0.0632156	0.00142635
0.0632838	0.00142608
0.0633521	0.00142582
0.0634204	0.00142555
0.0634886	0.00142529
0.0635569	0.00142502
0.0636252	0.00142476
0.0636934	0.00142449
0.0637617	0.00142423
0.06383	0.00142396
0.0638982	0.0014237
0.0639665	0.00142343
0.0640348	0.00142317
0.064103	0.0014229
0.0641713	0.00142263
0.0642396	0.00142237
0.0643078	0.0014221
0.0643761	0.00142184
0.0644444	0.00142157
0.0645126	0.0014213
0.0645809	0.00142104
0.0646492	0.00142077
0.0647174	0.00142051
0.0647857	0.00142024
0.064854	0.00141997
0.0649222	0.00141971
0.0649905	0.00141944
0.0650588	0.00141918
0.065127	0.00141891
0.0651953	0.00141864
0.0652636	0.00141838
0.0653318	0.00141811
0.0654001	0.00141785
0.0654684	0.00141758
0.0655366	0.00141731
0.0656049	0.00141705
0.0656732	0.00141678
0.0657414	0.00141652
0.0658097	0.00141625
0.065878	0.00141599
0.0659462	0.00141572
0.0660145	0.00141545
0.0660828	0.00141519
0.066151	0.00141492
0.0662193	0.00141466
0.0662876	0.00141439
0.0663558	0.00141413
0.0664241	0.00141386
0.0664924	0.0014136
0.0665606	0.00141333
0.0666289	0.00141307
0.0666972	0.0014128
0.0667654	0.00141253
0.0668337	0.00141227
0.066902	0.00141201
0.0669702	0.00141174
0.0670385	0.00141147
0.0671068	0.00141121
0.067175	0.00141095
0.0672433	0.00141068
0.0673116	0.00141042
0.0673798	0.00141015
0.0674481	0.00140989
0.0675164	0.00140962
0.0675846	0.00140936
0.0676529	0.00140909
0.0677212	0.00140883
0.0677894	0.00140857
0.0678577	0.0014083
0.067926	0.00140804
0.0679942	0.00140777
0.0680625	0.00140751
0.0681308	0.00140724
0.068199	0.00140698
0.0682673	0.00140671
0.0683356	0.00140645
0.0684038	0.00140619
0.0684721	0.00140592
0.0685404	0.00140566
0.0686086	0.00140539
0.0686769	0.00140513
0.0687452	0.00140486
0.0688134	0.0014046
0.0688817	0.00140434
0.06895	0.00140407
0.0690182	0.00140381
0.0690865	0.00140354
0.0691548	0.00140328
0.069223	0.00140301
0.0692913	0.00140275
0.0693596	0.00140248
0.0694278	0.00140222
0.0694961	0.00140196
0.0695644	0.00140169
0.0696326	0.00140143
0.0697009	0.00140116
0.0697692	0.0014009
0.0698374	0.00140063
0.0699057	0.00140037
0.069974	0.0014001
0.0700422	0.00139984
0.0701105	0.00139957
0.0701788	0.00139931
0.070247	0.00139904
0.0703153	0.00139878
0.0703836	0.00139851
0.0704518	0.00139825
0.0705201	0.00139798
0.0705884	0.00139771
0.0706566	0.00139745
0.0707249	0.00139718
0.0707932	0.00139692
0.0708614	0.00139665
0.0709297	0.00139638
0.070998	0.00139612
0.0710662	0.00139585
0.0711345	0.00139559
0.0712028	0.00139532
0.071271	0.00139505
0.0713393	0.00139478
0.0714076	0.00139452
0.0714758	0.00139425
0.0715441	0.00139398
0.0716124	0.00139372
0.0716806	0.00139345
0.0717489	0.00139318
0.0718172	0.00139291
0.0718854	0.00139264
0.0719537	0.00139237
0.072022	0.00139211
0.0720902	0.00139184
0.0721585	0.00139157
0.0722268	0.0013913
0.072295	0.00139103
0.0723633	0.00139076
0.0724316	0.00139049
0.0724998	0.00139022
0.0725681	0.00138995
0.0726364	0.00138968
0.0727046	0.00138941
0.0727729	0.00138914
0.0728412	0.00138887
0.0729094	0.00138859
0.0729777	0.00138832
0.073046	0.00138805
0.0731142	0.00138778
0.0731825	0.00138751
0.0732508	0.00138723
0.073319	0.00138696
0.0733873	0.00138669
0.0734556	0.00138641
0.0735239	0.00138614
0.0735921	0.00138587
0.0736604	0.00138559
0.0737287	0.00138532
0.0737969	0.00138504
0.0738652	0.00138477
0.0739335	0.00138449
0.0740017	0.00138422
0.07407	0.00138394
0.0741383	0.00138367
0.0742065	0.00138339
0.0742748	0.00138312
0.0743431	0.00138284
0.0744113	0.00138256
0.0744796	0.00138229
0.0745479	0.00138201
0.0746161	0.00138173
0.0746844	0.00138145
0.0747527	0.00138117
0.0748209	0.0013809
0.0748892	0.00138062
0.0749575	0.00138034
0.0750257	0.00138006
0.075094	0.00137978
0.0751623	0.0013795
0.0752305	0.00137922
0.0752988	0.00137894
0.0753671	0.00137866
0.0754353	0.00137838
0.0755036	0.00137809
0.0755719	0.00137781
0.0756401	0.00137753
0.0757084	0.00137725
0.0757767	0.00137697
0.0758449	0.00137668
0.0759132	0.0013764
0.0759815	0.00137612
0.0760497	0.00137583
0.076118	0.00137555
0.0761863	0.00137527
0.0762545	0.00137498
0.0763228	0.0013747
0.0763911	0.00137441
0.0764593	0.00137413
0.0765276	0.00137384
0.0765959	0.00137356
0.0766641	0.00137327
0.0767324	0.00137298
0.0768007	0.0013727
0.0768689	0.00137241
0.0769372	0.00137212
0.0770055	0.00137184
0.0770737	0.00137155
0.077142	0.00137126
0.0772103	0.00137097
0.0772785	0.00137068
0.0773468	0.0013704
0.0774151	0.00137011
0.0774833	0.00136982
0.0775516	0.00136953
0.0776199	0.00136924
0.0776881	0.00136895
0.0777564	0.00136866
0.0778247	0.00136837
0.0778929	0.00136808
0.0779612	0.00136779
0.0780295	0.0013675
0.0780977	0.00136721
0.078166	0.00136692
0.0782343	0.00136663
0.0783025	0.00136634
0.0783708	0.00136604
0.0784391	0.00136575
0.0785073	0.00136546
0.0785756	0.00136517
0.0786439	0.00136488
0.0787121	0.00136458
0.0787804	0.00136429
0.0788487	0.001364
0.0789169	0.00136371
0.0789852	0.00136341
0.0790535	0.00136312
0.0791217	0.00136283
0.07919	0.00136254
0.0792583	0.00136224
0.0793265	0.00136195
0.0793948	0.00136166
0.0794631	0.00136136
0.0795313	0.00136107
0.0795996	0.00136078
0.0796679	0.00136048
0.0797361	0.00136019
0.0798044	0.0013599
0.0798727	0.0013596
0.0799409	0.00135931
0.0800092	0.00135902
0.0800775	0.00135872
0.0801457	0.00135843
0.080214	0.00135813
0.0802823	0.00135784
0.0803505	0.00135755
0.0804188	0.00135725
0.0804871	0.00135696
0.0805553	0.00135667
0.0806236	0.00135638
0.0806919	0.00135608
0.0807601	0.00135579
0.0808284	0.0013555
0.0808967	0.00135521
0.0809649	0.00135491
0.0810332	0.00135462
0.0811015	0.00135433
0.0811697	0.00135404
0.081238	0.00135375
0.0813063	0.00135346
0.0813745	0.00135316
0.0814428	0.00135287
0.0815111	0.00135258
0.0815793	0.00135229
0.0816476	0.001352
0.0817159	0.00135171
0.0817841	0.00135143
0.0818524	0.00135114
0.0819207	0.00135085
0.0819889	0.00135056
0.0820572	0.00135027
0.0821255	0.00134998
0.0821937	0.0013497
0.082262	0.00134941
0.0823303	0.00134912
0.0823985	0.00134884
0.0824668	0.00134855
0.0825351	0.00134827
0.0826033	0.00134798
0.0826716	0.0013477
0.0827399	0.00134741
0.0828081	0.00134713
0.0828764	0.00134685
0.0829447	0.00134657
0.0830129	0.00134628
0.0830812	0.001346
0.0831495	0.00134572
0.0832177	0.00134544
0.083286	0.00134516
0.0833543	0.00134488
0.0834225	0.0013446
0.0834908	0.00134433
0.0835591	0.00134405
0.0836273	0.00134377
0.0836956	0.0013435
0.0837639	0.00134322
0.0838321	0.00134295
0.0839004	0.00134267
0.0839687	0.0013424
0.0840369	0.00134213
0.0841052	0.00134186
0.0841735	0.00134158
0.0842417	0.00134131
0.08431	0.00134104
0.0843783	0.00134077
0.0844465	0.0013405
0.0845148	0.00134024
0.0845831	0.00133997
0.0846513	0.0013397
0.0847196	0.00133944
0.0847879	0.00133917
0.0848561	0.00133891
0.0849244	0.00133865
0.0849927	0.00133838
0.0850609	0.00133812
0.0851292	0.00133786
0.0851975	0.0013376
0.0852657	0.00133734
0.085334	0.00133708
0.0854023	0.00133682
0.0854705	0.00133657
0.0855388	0.00133631
0.0856071	0.00133605
0.0856753	0.0013358
0.0857436	0.00133554
0.0858119	0.00133529
0.0858801	0.00133504
0.0859484	0.00133479
0.0860167	0.00133454
0.0860849	0.00133429
0.0861532	0.00133404
0.0862215	0.00133379
0.0862897	0.00133354
0.086358	0.00133329
0.0864263	0.00133305
0.0864945	0.00133281
0.0865628	0.00133256
0.0866311	0.00133232
0.0866993	0.00133207
0.0867676	0.00133183
0.0868359	0.00133159
0.0869041	0.00133135
0.0869724	0.00133111
0.0870407	0.00133087
0.0871089	0.00133063
0.0871772	0.0013304
0.0872455	0.00133016
0.0873137	0.00132993
0.087382	0.00132969
0.0874503	0.00132946
0.0875185	0.00132922
0.0875868	0.00132899
0.0876551	0.00132876
0.0877233	0.00132853
0.0877916	0.0013283
0.0878599	0.00132807
0.0879281	0.00132784
0.0879964	0.00132761
0.0880647	0.00132738
0.088133	0.00132715
0.0882012	0.00132693
0.0882695	0.0013267
0.0883378	0.00132647
0.088406	0.00132625
0.0884743	0.00132603
0.0885426	0.0013258
0.0886108	0.00132558
0.0886791	0.00132536
0.0887474	0.00132514
0.0888156	0.00132491
0.0888839	0.00132469
0.0889522	0.00132447
0.0890204	0.00132425
0.0890887	0.00132403
0.089157	0.00132382
0.0892252	0.0013236
0.0892935	0.00132338
0.0893618	0.00132316
0.08943	0.00132295
0.0894983	0.00132273
0.0895666	0.00132251
0.0896348	0.0013223
0.0897031	0.00132208
0.0897714	0.00132187
0.0898396	0.00132165
0.0899079	0.00132144
0.0899762	0.00132123
0.0900444	0.00132101
0.0901127	0.0013208
0.090181	0.00132059
0.0902492	0.00132037
0.0903175	0.00132016
0.0903858	0.00131995
0.090454	0.00131974
0.0905223	0.00131953
0.0905906	0.00131932
0.0906588	0.00131911
0.0907271	0.00131889
0.0907954	0.00131868
0.0908636	0.00131847
0.0909319	0.00131826
0.0910002	0.00131805
0.0910684	0.00131784
0.0911367	0.00131763
0.091205	0.00131742
0.0912732	0.00131721
0.0913415	0.001317
0.0914098	0.00131679
0.091478	0.00131659
0.0915463	0.00131638
0.0916146	0.00131617
0.0916828	0.00131596
0.0917511	0.00131575
0.0918194	0.00131554
0.0918876	0.00131533
0.0919559	0.00131512
0.0920242	0.00131491
0.0920924	0.0013147
0.0921607	0.00131449
0.092229	0.00131428
0.0922972	0.00131408
0.0923655	0.00131387
0.0924338	0.00131366
0.092502	0.00131345
0.0925703	0.00131324
0.0926386	0.00131303
0.0927068	0.00131282
0.0927751	0.00131261
0.0928434	0.0013124
0.0929116	0.00131219
0.0929799	0.00131198
0.0930482	0.00131177
0.0931164	0.00131156
0.0931847	0.00131135
0.093253	0.00131114
0.0933212	0.00131093
0.0933895	0.00131072
0.0934578	0.00131051
0.093526	0.0013103
0.0935943	0.00131008
0.0936626	0.00130987
0.0937308	0.00130966
0.0937991	0.00130945
0.0938674	0.00130924
0.0939356	0.00130903
0.0940039	0.00130882
0.0940722	0.0013086
0.0941404	0.00130839
0.0942087	0.00130818
0.094277	0.00130796
0.0943452	0.00130775
0.0944135	0.00130754
0.0944818	0.00130732
0.09455	0.00130711
0.0946183	0.0013069
0.0946866	0.00130668
0.0947548	0.00130647
0.0948231	0.00130625
0.0948914	0.00130604
0.0949596	0.00130583
0.0950279	0.00130561
0.0950962	0.00130539
0.0951644	0.00130518
0.0952327	0.00130496
0.095301	0.00130475
0.0953692	0.00130453
0.0954375	0.00130432
0.0955058	0.0013041
0.095574	0.00130388
0.0956423	0.00130367
0.0957106	0.00130345
0.0957788	0.00130323
0.0958471	0.00130302
0.0959154	0.0013028
0.0959836	0.00130258
0.0960519	0.00130236
0.0961202	0.00130214
0.0961884	0.00130193
0.0962567	0.00130171
0.096325	0.00130149
0.0963932	0.00130127
0.0964615	0.00130105
0.0965298	0.00130083
0.096598	0.00130061
0.0966663	0.00130039
0.0967346	0.00130017
0.0968028	0.00129996
0.0968711	0.00129974
0.0969394	0.00129952
0.0970076	0.0012993
0.0970759	0.00129908
0.0971442	0.00129886
0.0972124	0.00129864
0.0972807	0.00129842
0.097349	0.0012982
0.0974172	0.00129798
0.0974855	0.00129775
0.0975538	0.00129753
0.097622	0.00129731
0.0976903	0.00129709
0.0977586	0.00129687
0.0978268	0.00129665
0.0978951	0.00129643
0.0979634	0.00129621
0.0980316	0.00129599
0.0980999	0.00129577
0.0981682	0.00129555
0.0982364	0.00129532
0.0983047	0.0012951
0.098373	0.00129488
0.0984412	0.00129466
0.0985095	0.00129444
0.0985778	0.00129422
0.098646	0.001294
0.0987143	0.00129378
0.0987826	0.00129356
0.0988508	0.00129334
0.0989191	0.00129312
0.0989874	0.0012929
0.0990556	0.00129268
0.0991239	0.00129245
0.0991922	0.00129223
0.0992604	0.00129201
0.0993287	0.00129179
0.099397	0.00129157
0.0994652	0.00129135
0.0995335	0.00129113
0.0996018	0.00129091
0.09967	0.00129069
0.0997383	0.00129047
0.0998066	0.00129025
0.0998748	0.00129003
0.0999431	0.00128981
0.100011	0.0012896
0.10008	0.00128938
0.100148	0.00128916
0.100216	0.00128894
0.100284	0.00128872
0.100353	0.0012885
0.100421	0.00128828
0.100489	0.00128807
0.100558	0.00128785
0.100626	0.00128763
0.100694	0.00128741
0.100762	0.0012872
0.100831	0.00128698
0.100899	0.00128676
0.100967	0.00128655
0.101035	0.00128633
0.101104	0.00128612
0.101172	0.0012859
0.10124	0.00128568
0.101308	0.00128547
0.101377	0.00128526
0.101445	0.00128504
0.101513	0.00128483
0.101582	0.00128461
0.10165	0.0012844
0.101718	0.00128419
0.101786	0.00128397
0.101855	0.00128376
0.101923	0.00128355
0.101991	0.00128334
0.102059	0.00128313
0.102128	0.00128292
0.102196	0.00128271
0.102264	0.0012825
0.102332	0.00128228
0.102401	0.00128207
0.102469	0.00128187
0.102537	0.00128166
0.102606	0.00128145
0.102674	0.00128124
0.102742	0.00128103
0.10281	0.00128082
0.102879	0.00128062
0.102947	0.00128041
0.103015	0.0012802
0.103083	0.00128
0.103152	0.00127979
0.10322	0.00127959
0.103288	0.00127938
0.103356	0.00127918
0.103425	0.00127897
0.103493	0.00127877
0.103561	0.00127856
0.10363	0.00127836
0.103698	0.00127816
0.103766	0.00127796
0.103834	0.00127775
0.103903	0.00127755
0.103971	0.00127735
0.104039	0.00127715
0.104107	0.00127695
0.104176	0.00127675
0.104244	0.00127655
0.104312	0.00127635
0.10438	0.00127615
0.104449	0.00127596
0.104517	0.00127576
0.104585	0.00127556
0.104654	0.00127536
0.104722	0.00127517
0.10479	0.00127497
0.104858	0.00127477
0.104927	0.00127458
0.104995	0.00127438
0.105063	0.00127419
0.105131	0.00127399
0.1052	0.0012738
0.105268	0.0012736
0.105336	0.00127341
0.105404	0.00127322
0.105473	0.00127302
0.105541	0.00127283
0.105609	0.00127264
0.105678	0.00127245
0.105746	0.00127226
0.105814	0.00127207
0.105882	0.00127188
0.105951	0.00127169
0.106019	0.0012715
0.106087	0.00127131
0.106155	0.00127112
0.106224	0.00127093
0.106292	0.00127074
0.10636	0.00127055
0.106428	0.00127036
0.106497	0.00127017
0.106565	0.00126999
0.106633	0.0012698
0.106702	0.00126961
0.10677	0.00126943
0.106838	0.00126924
0.106906	0.00126906
0.106975	0.00126887
0.107043	0.00126868
0.107111	0.0012685
0.107179	0.00126831
0.107248	0.00126813
0.107316	0.00126794
0.107384	0.00126776
0.107452	0.00126757
0.107521	0.00126739
0.107589	0.00126721
0.107657	0.00126702
0.107726	0.00126684
0.107794	0.00126666
0.107862	0.00126647
0.10793	0.00126629
0.107999	0.00126611
0.108067	0.00126593
0.108135	0.00126574
0.108203	0.00126556
0.108272	0.00126538
0.10834	0.0012652
0.108408	0.00126502
0.108476	0.00126484
0.108545	0.00126465
0.108613	0.00126447
0.108681	0.00126429
0.10875	0.00126411
0.108818	0.00126393
0.108886	0.00126375
0.108954	0.00126357
0.109023	0.00126339
0.109091	0.00126321
0.109159	0.00126303
0.109227	0.00126285
0.109296	0.00126267
0.109364	0.00126249
0.109432	0.00126231
0.1095	0.00126213
0.109569	0.00126194
0.109637	0.00126176
0.109705	0.00126158
0.109774	0.0012614
0.109842	0.00126122
0.10991	0.00126104
0.109978	0.00126086
0.110047	0.00126069
0.110115	0.00126051
0.110183	0.00126033
0.110251	0.00126015
0.11032	0.00125997
0.110388	0.00125979
0.110456	0.00125961
0.110524	0.00125942
0.110593	0.00125924
0.110661	0.00125906
0.110729	0.00125888
0.110798	0.0012587
0.110866	0.00125852
0.110934	0.00125834
0.111002	0.00125816
0.111071	0.00125798
0.111139	0.0012578
0.111207	0.00125762
0.111275	0.00125744
0.111344	0.00125725
0.111412	0.00125707
0.11148	0.00125689
0.111548	0.00125671
0.111617	0.00125653
0.111685	0.00125634
0.111753	0.00125616
0.111822	0.00125598
0.11189	0.0012558
0.111958	0.00125561
0.112026	0.00125543
0.112095	0.00125525
0.112163	0.00125507
0.112231	0.00125488
0.112299	0.0012547
0.112368	0.00125451
0.112436	0.00125433
0.112504	0.00125415
0.112572	0.00125396
0.112641	0.00125378
0.112709	0.00125359
0.112777	0.00125341
0.112846	0.00125322
0.112914	0.00125304
0.112982	0.00125285
0.11305	0.00125267
0.113119	0.00125248
0.113187	0.00125229
0.113255	0.00125211
0.113323	0.00125192
0.113392	0.00125173
0.11346	0.00125155
0.113528	0.00125136
0.113596	0.00125117
0.113665	0.00125099
0.113733	0.0012508
0.113801	0.00125061
0.11387	0.00125042
0.113938	0.00125023
0.114006	0.00125004
0.114074	0.00124986
0.114143	0.00124967
0.114211	0.00124948
0.114279	0.00124929
0.114347	0.0012491
0.114416	0.00124891
0.114484	0.00124872
0.114552	0.00124853
0.11462	0.00124834
0.114689	0.00124814
0.114757	0.00124795
0.114825	0.00124776
0.114894	0.00124757
0.114962	0.00124738
0.11503	0.00124718
0.115098	0.00124699
0.115167	0.0012468
0.115235	0.0012466
0.115303	0.00124641
0.115371	0.00124622
0.11544	0.00124602
0.115508	0.00124583
0.115576	0.00124563
0.115644	0.00124544
0.115713	0.00124524
0.115781	0.00124505
0.115849	0.00124485
0.115918	0.00124466
0.115986	0.00124446
0.116054	0.00124426
0.116122	0.00124407
0.116191	0.00124387
0.116259	0.00124367
0.116327	0.00124348
0.116395	0.00124328
0.116464	0.00124308
0.116532	0.00124288
0.1166	0.00124268
0.116668	0.00124248
0.116737	0.00124229
0.116805	0.00124209
0.116873	0.00124189
0.116942	0.00124169
0.11701	0.00124149
0.117078	0.00124129
0.117146	0.00124109
0.117215	0.00124089
0.117283	0.00124069
0.117351	0.00124048
0.117419	0.00124028
0.117488	0.00124008
0.117556	0.00123988
0.117624	0.00123967
0.117692	0.00123947
0.117761	0.00123927
0.117829	0.00123906
0.117897	0.00123886
0.117966	0.00123866
0.118034	0.00123845
0.118102	0.00123825
0.11817	0.00123804
0.118239	0.00123784
0.118307	0.00123763
0.118375	0.00123743
0.118443	0.00123722
0.118512	0.00123701
0.11858	0.00123681
0.118648	0.0012366
0.118716	0.00123639
0.118785	0.00123619
0.118853	0.00123598
0.118921	0.00123577
0.11899	0.00123556
0.119058	0.00123535
0.119126	0.00123514
0.119194	0.00123493
0.119263	0.00123472
0.119331	0.00123451
0.119399	0.0012343
0.119467	0.00123409
0.119536	0.00123388
0.119604	0.00123367
0.119672	0.00123346
0.11974	0.00123325
0.119809	0.00123303
0.119877	0.00123282
0.119945	0.00123261
0.120014	0.0012324
0.120082	0.00123218
0.12015	0.00123197
0.120218	0.00123175
0.120287	0.00123154
0.120355	0.00123133
0.120423	0.00123111
0.120491	0.0012309
0.12056	0.00123068
0.120628	0.00123047
0.120696	0.00123025
0.120764	0.00123003
0.120833	0.00122982
0.120901	0.0012296
0.120969	0.00122938
0.121038	0.00122917
0.121106	0.00122895
0.121174	0.00122873
0.121242	0.00122851
0.121311	0.00122829
0.121379	0.00122807
0.121447	0.00122786
0.121515	0.00122764
0.121584	0.00122742
0.121652	0.0012272
0.12172	0.00122698
0.121788	0.00122676
0.121857	0.00122654
0.121925	0.00122631
0.121993	0.00122609
0.122062	0.00122587
0.12213	0.00122565
0.122198	0.00122543
0.122266	0.00122521
0.122335	0.00122498
0.122403	0.00122476
0.122471	0.00122454
0.122539	0.00122432
0.122608	0.00122409
0.122676	0.00122387
0.122744	0.00122364
0.122812	0.00122342
0.122881	0.0012232
0.122949	0.00122297
0.123017	0.00122275
0.123086	0.00122252
0.123154	0.0012223
0.123222	0.00122207
0.12329	0.00122185
0.123359	0.00122162
0.123427	0.0012214
0.123495	0.00122117
0.123563	0.00122095
0.123632	0.00122072
0.1237	0.0012205
0.123768	0.00122027
0.123836	0.00122004
0.123905	0.00121982
0.123973	0.00121959
0.124041	0.00121936
0.12411	0.00121914
0.124178	0.00121891
0.124246	0.00121868
0.124314	0.00121846
0.124383	0.00121823
0.124451	0.001218
0.124519	0.00121778
0.124587	0.00121755
0.124656	0.00121732
0.124724	0.0012171
0.124792	0.00121687
0.12486	0.00121664
0.124929	0.00121641
0.124997	0.00121619
0.125065	0.00121596
0.125134	0.00121573
0.125202	0.00121551
0.12527	0.00121528
0.125338	0.00121505
0.125407	0.00121483
0.125475	0.0012146
0.125543	0.00121437
0.125611	0.00121415
0.12568	0.00121392
0.125748	0.00121369
0.125816	0.00121347
0.125885	0.00121324
0.125953	0.00121301
0.126021	0.00121279
0.126089	0.00121256
0.126158	0.00121234
0.126226	0.00121211
0.126294	0.00121189
0.126362	0.00121166
0.126431	0.00121143
0.126499	0.00121121
0.126567	0.00121098
0.126635	0.00121076
0.126704	0.00121053
0.126772	0.00121031
0.12684	0.00121009
0.126909	0.00120986
0.126977	0.00120964
0.127045	0.00120941
0.127113	0.00120919
0.127182	0.00120897
0.12725	0.00120874
0.127318	0.00120852
0.127386	0.0012083
0.127455	0.00120808
0.127523	0.00120785
0.127591	0.00120763
0.127659	0.00120741
0.127728	0.00120719
0.127796	0.00120697
0.127864	0.00120675
0.127933	0.00120653
0.128001	0.0012063
0.128069	0.00120608
0.128137	0.00120586
0.128206	0.00120564
0.128274	0.00120542
0.128342	0.00120521
0.12841	0.00120499
0.128479	0.00120477
0.128547	0.00120455
0.128615	0.00120433
0.128683	0.00120411
0.128752	0.00120389
0.12882	0.00120368
0.128888	0.00120346
0.128957	0.00120324
0.129025	0.00120302
0.129093	0.00120281
0.129161	0.00120259
0.12923	0.00120237
0.129298	0.00120216
0.129366	0.00120194
0.129434	0.00120172
0.129503	0.00120151
0.129571	0.00120129
0.129639	0.00120108
0.129707	0.00120086
0.129776	0.00120065
0.129844	0.00120043
0.129912	0.00120022
0.129981	0.0012
0.130049	0.00119979
0.130117	0.00119957
0.130185	0.00119936
0.130254	0.00119914
0.130322	0.00119893
0.13039	0.00119872
0.130458	0.0011985
0.130527	0.00119829
0.130595	0.00119808
0.130663	0.00119786
0.130731	0.00119765
0.1308	0.00119743
0.130868	0.00119722
0.130936	0.00119701
0.131005	0.0011968
0.131073	0.00119658
0.131141	0.00119637
0.131209	0.00119615
0.131278	0.00119594
0.131346	0.00119573
0.131414	0.00119551
0.131482	0.0011953
0.131551	0.00119509
0.131619	0.00119487
0.131687	0.00119466
0.131755	0.00119444
0.131824	0.00119423
0.131892	0.00119402
0.13196	0.0011938
0.132029	0.00119359
0.132097	0.00119337
0.132165	0.00119316
0.132233	0.00119294
0.132302	0.00119273
0.13237	0.00119251
0.132438	0.0011923
0.132506	0.00119208
0.132575	0.00119187
0.132643	0.00119165
0.132711	0.00119143
0.132779	0.00119122
0.132848	0.001191
0.132916	0.00119078
0.132984	0.00119057
0.133053	0.00119035
0.133121	0.00119013
0.133189	0.00118991
0.133257	0.00118969
0.133326	0.00118947
0.133394	0.00118925
0.133462	0.00118903
0.13353	0.00118881
0.133599	0.00118859
0.133667	0.00118837
0.133735	0.00118815
0.133803	0.00118793
0.133872	0.00118771
0.13394	0.00118748
0.134008	0.00118726
0.134077	0.00118704
0.134145	0.00118681
0.134213	0.00118659
0.134281	0.00118636
0.13435	0.00118614
0.134418	0.00118591
0.134486	0.00118568
0.134554	0.00118546
0.134623	0.00118523
0.134691	0.001185
0.134759	0.00118477
0.134827	0.00118454
0.134896	0.00118431
0.134964	0.00118408
0.135032	0.00118385
0.135101	0.00118362
0.135169	0.00118339
0.135237	0.00118315
0.135305	0.00118292
0.135374	0.00118268
0.135442	0.00118245
0.13551	0.00118221
0.135578	0.00118198
0.135647	0.00118174
0.135715	0.0011815
0.135783	0.00118126
0.135851	0.00118102
0.13592	0.00118078
0.135988	0.00118054
0.136056	0.0011803
0.136125	0.00118006
0.136193	0.00117982
0.136261	0.00117957
0.136329	0.00117933
0.136398	0.00117908
[truncated: 41,949 more rows]

## Sheet: 1S1B
FSEC	lipids	rXKR9 fl. det.	rXKR9 cl. det.	rXKR9 fl.	rXKR9 cl.	rXKR9 cl.lipos.
volume [ml]	FLD350	FLD350	FLD350	FLD350	FLD350	FLD350
0	5.35201	3.84308	4.4767	5.2268	4.66072	4.78343
0.000360002	5.35259	3.84306	4.47795	5.22719	4.66084	4.78352
0.000720005	5.35324	3.8426	4.47934	5.22784	4.66099	4.78338
0.00108001	5.35394	3.8417	4.48073	5.22868	4.66111	4.78308
0.00144001	5.35473	3.84054	4.48197	5.22963	4.66115	4.78268
0.00180001	5.35564	3.83931	4.48298	5.23056	4.66109	4.78216
0.00216001	5.35665	3.83821	4.4837	5.23134	4.6609	4.7815
0.00252002	5.35764	3.83736	4.48413	5.23187	4.66065	4.78065
0.00288002	5.35853	3.8369	4.48429	5.23212	4.66039	4.77961
0.00324002	5.35929	3.83689	4.48419	5.23213	4.66028	4.77843
0.00360002	5.35992	3.83738	4.48384	5.23199	4.66042	4.77718
0.00396003	5.36052	3.83836	4.48329	5.2318	4.66089	4.77602
0.00432003	5.36113	3.83978	4.48264	5.23161	4.66174	4.77508
0.00468003	5.36183	3.84155	4.48204	5.23146	4.66299	4.7745
0.00504003	5.36271	3.84355	4.48166	5.2313	4.66461	4.77434
0.00540003	5.36385	3.84557	4.48165	5.23107	4.66653	4.77459
0.00576004	5.36521	3.84743	4.48213	5.23072	4.66861	4.77516
0.00612004	5.36666	3.84887	4.48314	5.23019	4.6707	4.77591
0.00648004	5.36797	3.84974	4.48463	5.22947	4.67266	4.7767
0.00684004	5.36892	3.84997	4.48647	5.2286	4.67436	4.77736
0.00720005	5.36934	3.84954	4.48844	5.22768	4.67569	4.7778
0.00756005	5.36912	3.8485	4.49029	5.22689	4.67661	4.77794
0.00792005	5.36823	3.84701	4.49181	5.2264	4.67716	4.77781
0.00828005	5.36672	3.84534	4.49286	5.22633	4.67743	4.77748
0.00864006	5.36482	3.84381	4.49344	5.22671	4.6775	4.77703
0.00900006	5.36279	3.8427	4.49361	5.22749	4.67746	4.77659
0.00936006	5.36094	3.84215	4.49347	5.22856	4.67739	4.77624
0.00972006	5.35947	3.84215	4.49317	5.22977	4.67733	4.77605
0.0100801	5.35847	3.84262	4.49285	5.23095	4.67729	4.77609
0.0104401	5.35794	3.84343	4.49263	5.23197	4.6772	4.77635
0.0108001	5.35784	3.8444	4.49255	5.23272	4.67695	4.77679
0.0111601	5.35808	3.84532	4.49253	5.23313	4.67643	4.77735
0.0115201	5.35852	3.84597	4.49249	5.23329	4.67557	4.7779
0.0118801	5.35901	3.84622	4.49234	5.23332	4.67439	4.77837
0.0122401	5.35944	3.84609	4.492	5.23338	4.67296	4.77873
0.0126001	5.35977	3.84565	4.49142	5.23367	4.67138	4.77897
0.0129601	5.35999	3.84502	4.49056	5.23424	4.66976	4.77908
0.0133201	5.36014	3.84427	4.48943	5.2351	4.66823	4.77906
0.0136801	5.3602	3.8435	4.48812	5.23621	4.66694	4.77893
0.0140401	5.36019	3.84283	4.48673	5.2375	4.66603	4.77876
0.0144001	5.36011	3.84242	4.48541	5.23883	4.66561	4.77865
0.0147601	5.36004	3.84236	4.48427	5.23997	4.6657	4.77864
0.0151201	5.36004	3.84265	4.48343	5.2407	4.66626	4.77872
0.0154801	5.36018	3.84321	4.48301	5.24089	4.66719	4.77885
0.0158401	5.36052	3.84392	4.48307	5.24054	4.66835	4.77898
0.0162001	5.36112	3.84464	4.4836	5.23977	4.66961	4.77911
0.0165601	5.36202	3.84524	4.48445	5.23877	4.67085	4.77926
0.0169201	5.36324	3.84561	4.48544	5.23769	4.67198	4.7794
0.0172801	5.3647	3.84561	4.48635	5.23672	4.67289	4.77949
0.0176401	5.3663	3.84522	4.48703	5.23604	4.67356	4.77949
0.0180001	5.3679	3.84453	4.48732	5.23575	4.67401	4.77938
0.0183601	5.36938	3.84374	4.48717	5.23589	4.67431	4.77918
0.0187201	5.37068	3.84312	4.4866	5.2363	4.67454	4.77891
0.0190801	5.37172	3.84285	4.48568	5.23675	4.6747	4.77855
0.0194401	5.37248	3.84306	4.48464	5.237	4.67476	4.77806
0.0198001	5.37295	3.84372	4.48373	5.23689	4.67466	4.7775
0.0201601	5.37316	3.84474	4.48316	5.23636	4.67442	4.77695
0.0205201	5.37317	3.84597	4.48303	5.23543	4.67408	4.77653
0.0208801	5.37303	3.84721	4.48338	5.23416	4.67371	4.77629
0.0212401	5.37279	3.84823	4.48415	5.23266	4.67339	4.77631
0.0216001	5.37241	3.84888	4.4852	5.23111	4.67319	4.77661
0.0219601	5.37188	3.84908	4.48638	5.22969	4.67321	4.77716
0.0223201	5.37126	3.84884	4.48748	5.2286	4.67353	4.7779
0.0226801	5.37064	3.84827	4.48835	5.22794	4.67418	4.77871
0.0230401	5.37012	3.84749	4.48889	5.22772	4.67504	4.77949
0.0234001	5.36973	3.84663	4.48911	5.22792	4.67597	4.78022
0.0237602	5.36948	3.84578	4.48908	5.22847	4.67678	4.78087
0.0241202	5.36934	3.84495	4.48895	5.22932	4.67733	4.78149
0.0244802	5.36929	3.84415	4.48884	5.23044	4.67753	4.78212
0.0248402	5.36931	3.84337	4.48886	5.23179	4.67742	4.78287
0.0252002	5.36928	3.84266	4.48908	5.23328	4.67709	4.78382
0.0255602	5.36907	3.84205	4.48952	5.23485	4.67667	4.785
0.0259202	5.36857	3.8416	4.49011	5.23643	4.67633	4.78633
0.0262802	5.36776	3.84134	4.49076	5.23795	4.67619	4.78768
0.0266402	5.36671	3.84136	4.49133	5.23932	4.67632	4.78891
0.0270002	5.36556	3.84177	4.49173	5.24044	4.67672	4.78988
0.0273602	5.36445	3.84262	4.49196	5.24123	4.67734	4.79054
0.0277202	5.36357	3.84389	4.49199	5.24163	4.67805	4.79085
0.0280802	5.36308	3.84544	4.49184	5.24161	4.67873	4.79082
0.0284402	5.36312	3.84712	4.49153	5.2412	4.67927	4.79052
0.0288002	5.36379	3.84877	4.49114	5.24052	4.67963	4.79001
0.0291602	5.36509	3.85027	4.49079	5.23975	4.67982	4.78941
0.0295202	5.36696	3.8515	4.49058	5.23909	4.67987	4.78874
0.0298802	5.36927	3.85234	4.49048	5.23862	4.67983	4.78798
0.0302402	5.37182	3.85273	4.49039	5.23837	4.6797	4.78709
0.0306002	5.37436	3.85268	4.4902	5.23828	4.67952	4.78607
0.0309602	5.37663	3.85234	4.48988	5.23828	4.6793	4.78495
0.0313202	5.37841	3.85188	4.48943	5.23832	4.67905	4.78375
0.0316802	5.37954	3.85143	4.48887	5.23829	4.67876	4.78256
0.0320402	5.3799	3.85106	4.48821	5.23812	4.67842	4.78145
0.0324002	5.37947	3.85079	4.4875	5.23774	4.67803	4.78053
0.0327602	5.37835	3.85066	4.48686	5.23723	4.67761	4.77986
0.0331202	5.37673	3.8507	4.48646	5.23676	4.67718	4.77951
0.0334802	5.37493	3.85084	4.48637	5.23651	4.67677	4.77948
0.0338402	5.37325	3.851	4.48657	5.2366	4.67637	4.77975
0.0342002	5.37194	3.85107	4.48692	5.23703	4.67595	4.78026
0.0345602	5.37117	3.85098	4.48729	5.23767	4.67553	4.78091
0.0349202	5.37094	3.85075	4.48757	5.23837	4.67511	4.78162
0.0352802	5.37122	3.85042	4.48766	5.23898	4.67473	4.78237
0.0356402	5.37182	3.85008	4.48754	5.23933	4.6744	4.78309
0.0360002	5.37252	3.84984	4.48722	5.23925	4.67418	4.78367
0.0363602	5.37305	3.84975	4.48681	5.23862	4.6741	4.78399
0.0367202	5.37326	3.84982	4.48645	5.23741	4.67419	4.78395
0.0370802	5.37307	3.85004	4.48626	5.23573	4.67443	4.78354
0.0374402	5.37252	3.85038	4.48629	5.23375	4.67479	4.78283
0.0378002	5.37179	3.8508	4.48649	5.23172	4.67513	4.7819
0.0381602	5.37106	3.85121	4.48675	5.22984	4.67539	4.78085
0.0385202	5.37051	3.8515	4.48696	5.22828	4.67549	4.77981
0.0388802	5.37028	3.85162	4.48703	5.22717	4.6754	4.77897
0.0392403	5.37046	3.85161	4.48687	5.22658	4.67512	4.7785
0.0396003	5.37109	3.85155	4.48648	5.2265	4.67468	4.7785
0.0399603	5.37207	3.85156	4.48592	5.22683	4.67412	4.77895
0.0403203	5.37324	3.85168	4.48532	5.22745	4.67353	4.77977
0.0406803	5.37445	3.85193	4.4848	5.22821	4.67299	4.78083
0.0410403	5.37556	3.85223	4.48442	5.22898	4.67259	4.78202
0.0414003	5.37651	3.8525	4.48418	5.22966	4.67234	4.78317
0.0417603	5.37724	3.85264	4.48407	5.23016	4.67225	4.78419
0.0421203	5.37775	3.85253	4.48411	5.23049	4.6723	4.78495
0.0424803	5.37804	3.85209	4.48431	5.23071	4.67241	4.78538
0.0428403	5.37814	3.85129	4.4847	5.2309	4.67253	4.78544
0.0432003	5.37814	3.85017	4.48528	5.23114	4.67258	4.78513
0.0435603	5.37808	3.8488	4.48603	5.23146	4.67252	4.78452
0.0439203	5.37801	3.84732	4.48695	5.23184	4.67229	4.78371
0.0442803	5.37794	3.8459	4.48801	5.23226	4.67191	4.78287
0.0446403	5.37791	3.84464	4.48914	5.23267	4.67138	4.78216
0.0450003	5.37799	3.84365	4.49023	5.233	4.67075	4.7817
0.0453603	5.37825	3.843	4.4911	5.23318	4.67012	4.78159
0.0457203	5.37869	3.84279	4.49166	5.23318	4.66962	4.7819
0.0460803	5.37933	3.84305	4.49187	5.23303	4.66937	4.78262
0.0464403	5.38013	3.84378	4.49173	5.23284	4.66945	4.78367
0.0468003	5.38104	3.84496	4.49132	5.23282	4.66984	4.78486
0.0471603	5.38191	3.84654	4.49072	5.23322	4.67049	4.786
0.0475203	5.38255	3.84843	4.49007	5.23424	4.67133	4.7869
0.0478803	5.38275	3.85051	4.48948	5.23595	4.67226	4.78751
0.0482403	5.38239	3.85259	4.48909	5.23833	4.67318	4.7878
0.0486003	5.38148	3.85449	4.48896	5.24117	4.67395	4.7878
0.0489603	5.38011	3.85601	4.48913	5.24419	4.67449	4.78758
0.0493203	5.37839	3.85703	4.48957	5.24698	4.67479	4.78725
0.0496803	5.37649	3.8575	4.49019	5.24912	4.67498	4.78694
0.0500403	5.37465	3.85736	4.49089	5.25019	4.67519	4.78676
0.0504003	5.37308	3.85664	4.49156	5.24998	4.67556	4.78675
0.0507603	5.37194	3.85543	4.49209	5.24849	4.67619	4.78691
0.0511203	5.37126	3.85389	4.49238	5.24591	4.6771	4.78717
0.0514803	5.37097	3.85219	4.49242	5.24256	4.67829	4.7875
0.0518403	5.37093	3.85057	4.49222	5.23882	4.67971	4.78787
0.0522003	5.37108	3.84922	4.49189	5.23509	4.68128	4.78826
0.0525603	5.37136	3.84831	4.49158	5.2317	4.68286	4.78867
0.0529203	5.3718	3.84791	4.4914	5.22889	4.68431	4.7891
0.0532803	5.37241	3.84807	4.49145	5.22677	4.68553	4.78956
0.0536403	5.37322	3.84872	4.49176	5.22529	4.68653	4.79009
0.0540003	5.37425	3.84976	4.49235	5.2244	4.68734	4.79067
0.0543603	5.3755	3.85103	4.4932	5.22403	4.68801	4.79124
0.0547204	5.37688	3.85237	4.49423	5.22413	4.68857	4.79174
0.0550804	5.37822	3.85361	4.49529	5.22468	4.68913	4.79209
0.0554404	5.37939	3.85461	4.49625	5.22558	4.68972	4.79226
0.0558004	5.38025	3.85529	4.49705	5.22676	4.69037	4.79223
0.0561604	5.38068	3.85566	4.49768	5.22814	4.69103	4.79202
0.0565204	5.38064	3.85578	4.49817	5.22965	4.69168	4.79168
0.0568804	5.38018	3.85571	4.49854	5.23121	4.69228	4.7913
0.0572404	5.37947	3.85548	4.49878	5.2327	4.69282	4.791
0.0576004	5.37876	3.85514	4.49893	5.23401	4.69328	4.79088
0.0579604	5.3782	3.85465	4.49901	5.23504	4.69365	4.79098
0.0583204	5.37787	3.854	4.49899	5.2358	4.69387	4.7913
0.0586804	5.37779	3.85317	4.49881	5.23629	4.6939	4.79175
0.0590404	5.37794	3.85212	4.49837	5.23654	4.69369	4.79224
0.0594004	5.37828	3.85084	4.49761	5.23653	4.6932	4.79266
0.0597604	5.37871	3.84933	4.49657	5.23629	4.69235	4.79289
0.0601204	5.37909	3.84769	4.49533	5.23588	4.69112	4.79287
0.0604804	5.37931	3.84607	4.49401	5.23542	4.68957	4.79252
0.0608404	5.37935	3.84465	4.49277	5.23503	4.6878	4.79184
0.0612004	5.37926	3.84363	4.49181	5.23486	4.68599	4.79088
0.0615604	5.37915	3.84313	4.49133	5.23501	4.68438	4.78973
0.0619204	5.37908	3.84328	4.49142	5.2356	4.6832	4.78855
0.0622804	5.37911	3.8441	4.49206	5.23664	4.68262	4.78745
0.0626404	5.3793	3.84555	4.49311	5.23806	4.68273	4.78654
0.0630004	5.37969	3.84753	4.49436	5.23972	4.68348	4.78587
0.0633604	5.38028	3.84986	4.49558	5.2414	4.68475	4.78547
0.0637204	5.38102	3.85234	4.49659	5.2429	4.68633	4.78539
0.0640804	5.3818	3.85481	4.49723	5.24398	4.68802	4.78563
0.0644404	5.38254	3.85712	4.49743	5.24453	4.68963	4.78615
0.0648004	5.3832	3.85918	4.49716	5.24449	4.69096	4.78685
0.0651604	5.38372	3.861	4.49648	5.24399	4.6919	4.78765
0.0655204	5.38409	3.86261	4.49548	5.2432	4.69242	4.78848
0.0658804	5.38434	3.86408	4.49431	5.24237	4.69255	4.78935
0.0662404	5.38458	3.86541	4.49307	5.24164	4.69239	4.79023
0.0666004	5.38495	3.86655	4.49184	5.24114	4.692	4.79112
0.0669604	5.38552	3.86742	4.49065	5.24094	4.69146	4.79201
0.0673204	5.38629	3.86797	4.48955	5.24098	4.69085	4.79288
0.0676804	5.38723	3.86812	4.48859	5.24113	4.69024	4.79372
0.0680404	5.3883	3.86781	4.48786	5.2412	4.68974	4.79455
0.0684004	5.38938	3.86699	4.48738	5.24099	4.68944	4.79534
0.0687604	5.39032	3.86565	4.48713	5.24035	4.68943	4.79602
0.0691204	5.39093	3.86388	4.48702	5.23928	4.68971	4.79658
0.0694804	5.39109	3.86184	4.48693	5.23781	4.69025	4.79698
0.0698404	5.39082	3.85972	4.48679	5.23605	4.69096	4.79726
0.0702004	5.39019	3.85767	4.48656	5.23413	4.69175	4.79747
0.0705605	5.38933	3.85581	4.48623	5.23225	4.69248	4.79766
0.0709205	5.38833	3.85422	4.48586	5.23064	4.69301	4.79787
0.0712805	5.38732	3.85297	4.4856	5.22947	4.69316	4.79818
0.0716405	5.38641	3.85211	4.48565	5.22882	4.69283	4.79866
0.0720005	5.3857	3.85163	4.48624	5.22866	4.69193	4.79931
0.0723605	5.38525	3.85149	4.48747	5.22891	4.69049	4.80007
0.0727205	5.38498	3.85164	4.48933	5.22944	4.68866	4.80082
0.0730805	5.38483	3.85202	4.49168	5.23012	4.6866	4.80146
0.0734405	5.38473	3.85258	4.49428	5.23078	4.68452	4.80194
0.0738005	5.38465	3.85327	4.49686	5.23134	4.68261	4.8022
0.0741605	5.38467	3.85405	4.49915	5.2317	4.68102	4.8022
0.0745205	5.38481	3.85484	4.50091	5.23187	4.67992	4.80192
0.0748805	5.38512	3.85557	4.50203	5.2319	4.67942	4.8014
0.0752405	5.38555	3.85616	4.50254	5.23189	4.67955	4.80071
0.0756005	5.38611	3.85656	4.50256	5.23189	4.68024	4.79994
0.0759605	5.38678	3.85672	4.50225	5.23197	4.68133	4.79912
0.0763205	5.38749	3.85664	4.50178	5.23211	4.68268	4.79825
0.0766805	5.38816	3.85633	4.50122	5.23227	4.68417	4.79735
0.0770405	5.38868	3.85583	4.50059	5.23238	4.68569	4.79642
0.0774005	5.38898	3.85523	4.49986	5.23236	4.68714	4.79549
0.0777605	5.389	3.85471	4.49899	5.2322	4.68843	4.79463
0.0781205	5.38878	3.85446	4.49792	5.23196	4.68951	4.79391
0.0784805	5.38836	3.85465	4.49663	5.23168	4.69041	4.79345
0.0788405	5.38779	3.85537	4.49517	5.23146	4.69122	4.79333
0.0792005	5.38719	3.85659	4.49367	5.23131	4.69203	4.79361
0.0795605	5.3866	3.85826	4.49226	5.23127	4.69288	4.79429
0.0799205	5.38607	3.86023	4.49112	5.23137	4.69378	4.79531
0.0802805	5.38561	3.86232	4.49035	5.23155	4.69469	4.79658
0.0806405	5.38523	3.86431	4.49002	5.23173	4.69555	4.79794
0.0810005	5.38493	3.86598	4.49014	5.23179	4.69625	4.79917
0.0813605	5.38472	3.86716	4.4906	5.23167	4.69663	4.80007
0.0817205	5.38453	3.86782	4.49126	5.23142	4.69654	4.80052
0.0820805	5.38432	3.86801	4.49197	5.23114	4.69586	4.80051
0.0824405	5.38403	3.86781	4.4926	5.23092	4.69462	4.80009
0.0828005	5.38365	3.8673	4.49313	5.23086	4.69293	4.79936
0.0831605	5.38318	3.86657	4.49354	5.231	4.69105	4.79844
0.0835205	5.38262	3.86571	4.49388	5.23135	4.68923	4.79745
0.0838805	5.382	3.86478	4.4942	5.23188	4.68774	4.79652
0.0842405	5.38139	3.86387	4.49455	5.23247	4.68678	4.79575
0.0846005	5.38091	3.86298	4.49498	5.23303	4.68645	4.79517
0.0849605	5.38062	3.8621	4.49551	5.23338	4.68676	4.79476
0.0853205	5.38058	3.86125	4.49606	5.23342	4.68763	4.79451
0.0856805	5.38082	3.86049	4.49657	5.23309	4.68888	4.79441
0.0860406	5.38133	3.85987	4.49692	5.23246	4.69031	4.79451
0.0864006	5.38204	3.85945	4.49703	5.23162	4.69171	4.79485
0.0867606	5.38287	3.85928	4.49694	5.23072	4.6929	4.79546
0.0871206	5.38369	3.85939	4.49669	5.2299	4.69384	4.79638
0.0874806	5.38437	3.85976	4.49642	5.22931	4.69456	4.79764
0.0878406	5.38486	3.86035	4.49622	5.22904	4.69515	4.79925
0.0882006	5.38518	3.86104	4.49621	5.22921	4.69568	4.80113
0.0885606	5.38539	3.8617	4.49643	5.22985	4.69621	4.80314
0.0889206	5.38555	3.86221	4.49684	5.23091	4.69676	4.80515
0.0892806	5.38571	3.86248	4.49739	5.23227	4.69736	4.80704
0.0896406	5.38592	3.86249	4.49789	5.23381	4.69803	4.80872
0.0900006	5.38626	3.86221	4.49821	5.2354	4.6987	4.81006
0.0903606	5.38677	3.86166	4.49821	5.23691	4.6993	4.81096
0.0907206	5.38745	3.86093	4.49786	5.23821	4.69971	4.81138
0.0910806	5.38825	3.86016	4.49712	5.23915	4.69988	4.8113
0.0914406	5.38906	3.85953	4.49609	5.23964	4.6998	4.81078
0.0918006	5.38982	3.85914	4.49493	5.23968	4.69952	4.80986
0.0921606	5.39052	3.85906	4.49388	5.23936	4.69908	4.80863
0.0925206	5.3912	3.85929	4.49321	5.2388	4.69854	4.80723
0.0928806	5.3919	3.85983	4.49311	5.2381	4.69801	4.80582
0.0932406	5.39261	3.86068	4.49362	5.23732	4.69756	4.80459
0.0936006	5.3933	3.86178	4.49474	5.23655	4.69719	4.80366
0.0939606	5.39397	3.86301	4.49634	5.23585	4.69694	4.80312
0.0943206	5.39456	3.86425	4.4983	5.23527	4.69677	4.80297
0.0946806	5.39502	3.86541	4.5004	5.23478	4.69669	4.80315
0.0950406	5.39525	3.86644	4.50237	5.23427	4.6967	4.8036
0.0954006	5.39516	3.86729	4.50398	5.23362	4.69675	4.80421
0.0957606	5.39472	3.86791	4.50511	5.23282	4.69682	4.80488
0.0961206	5.39396	3.86825	4.50577	5.23192	4.69691	4.80551
0.0964806	5.39307	3.86832	4.50603	5.23101	4.69707	4.80607
0.0968406	5.39227	3.8682	4.50599	5.23019	4.6974	4.8066
0.0972006	5.39175	3.86797	4.50572	5.22953	4.69795	4.80711
0.0975606	5.39168	3.86768	4.50534	5.22912	4.69868	4.80765
0.0979206	5.39212	3.86736	4.50497	5.22902	4.69955	4.80816
0.0982806	5.39299	3.86699	4.50467	5.22925	4.70046	4.80861
0.0986406	5.39418	3.86657	4.50453	5.22971	4.70135	4.80898
0.0990006	5.39546	3.86605	4.50451	5.23027	4.70212	4.8093
0.0993606	5.39658	3.86543	4.50463	5.23072	4.70266	4.80961
0.0997206	5.39735	3.86469	4.50485	5.23098	4.70289	4.80993
0.100081	5.39762	3.86379	4.50513	5.23099	4.70278	4.8103
0.100441	5.39739	3.86279	4.50543	5.23082	4.70238	4.81072
0.100801	5.39675	3.86178	4.50566	5.23056	4.70184	4.81121
0.101161	5.3959	3.86089	4.50572	5.23031	4.70136	4.81178
0.101521	5.39502	3.86026	4.50553	5.23018	4.70109	4.81231
0.101881	5.39427	3.85999	4.50503	5.23026	4.70107	4.81268
0.102241	5.39377	3.86012	4.50421	5.23056	4.70127	4.81276
0.102601	5.39358	3.86063	4.50313	5.23108	4.70163	4.81246
0.102961	5.3937	3.86149	4.50191	5.23173	4.70207	4.81181
0.103321	5.39409	3.86258	4.50073	5.23242	4.70247	4.81091
0.103681	5.39465	3.86379	4.49972	5.23306	4.70272	4.80993
0.104041	5.39528	3.86496	4.49903	5.23357	4.70277	4.80912
0.104401	5.39589	3.86592	4.49873	5.23395	4.70265	4.80866
0.104761	5.39646	3.86656	4.49881	5.2342	4.70246	4.80871
0.105121	5.39701	3.86687	4.49923	5.23439	4.70238	4.80931
0.105481	5.39759	3.8669	4.49982	5.23455	4.7025	4.81042
0.105841	5.39818	3.86673	4.5004	5.23466	4.70284	4.81193
0.106201	5.3988	3.86649	4.50075	5.23471	4.70333	4.81367
0.106561	5.39943	3.86631	4.50069	5.23464	4.70386	4.81538
0.106921	5.40009	3.86634	4.50016	5.2344	4.70427	4.81681
0.107281	5.40078	3.86668	4.49917	5.23399	4.70445	4.81776
0.107641	5.4014	3.86735	4.49778	5.23339	4.70428	4.81813
0.108001	5.40184	3.86825	4.49619	5.23262	4.70374	4.81795
0.108361	5.40199	3.86928	4.49463	5.23174	4.70285	4.81731
0.108721	5.4018	3.87033	4.49335	5.23083	4.70176	4.81627
0.109081	5.40127	3.87126	4.49253	5.23001	4.70057	4.81493
0.109441	5.40042	3.87193	4.49231	5.22946	4.69942	4.81339
0.109801	5.39927	3.87222	4.49271	5.22928	4.69845	4.81179
0.110161	5.3979	3.87208	4.49372	5.22956	4.69778	4.81023
0.110521	5.39643	3.87159	4.49521	5.2303	4.69747	4.80875
0.110881	5.395	3.87088	4.49701	5.23144	4.69757	4.80738
0.111241	5.39373	3.87008	4.49893	5.23288	4.69805	4.80611
0.111601	5.39268	3.86927	4.5008	5.23447	4.69893	4.80502
0.111961	5.39188	3.86848	4.50249	5.23607	4.70018	4.80418
0.112321	5.39129	3.86781	4.50391	5.23748	4.70173	4.80363
0.112681	5.39088	3.86728	4.50498	5.23855	4.70343	4.80338
0.113041	5.39066	3.86692	4.50566	5.23918	4.70507	4.8034
0.113401	5.39061	3.8667	4.50595	5.23934	4.70648	4.80363
0.113761	5.3907	3.86657	4.5059	5.23906	4.70752	4.80401
0.114121	5.39094	3.86649	4.50558	5.23839	4.70809	4.80443
0.114481	5.39129	3.86646	4.50509	5.23738	4.70813	4.80472
0.114841	5.39178	3.86649	4.50451	5.23606	4.70765	4.80483
0.115201	5.39241	3.86658	4.50392	5.23452	4.70677	4.80474
0.115561	5.39315	3.86668	4.50343	5.23288	4.70572	4.80449
0.115921	5.39393	3.86677	4.50307	5.23126	4.70475	4.80421
0.116281	5.39467	3.86683	4.5029	5.22974	4.70402	4.804
0.116641	5.39531	3.86687	4.50291	5.22838	4.70362	4.80398
0.117001	5.39584	3.86692	4.50312	5.22722	4.70358	4.80428
0.117361	5.39631	3.86704	4.50353	5.22633	4.70384	4.80501
0.117721	5.39673	3.86726	4.50412	5.22576	4.70435	4.80624
0.118081	5.39711	3.86763	4.50487	5.22553	4.70494	4.80796
0.118441	5.39747	3.86815	4.50571	5.22555	4.70547	4.81007
0.118801	5.39786	3.86882	4.50661	5.22574	4.70585	4.81243
0.119161	5.3983	3.8696	4.50747	5.22609	4.70608	4.81482
0.119521	5.39877	3.8704	4.50824	5.22662	4.70626	4.81707
0.119881	5.3992	3.87118	4.50883	5.22734	4.70645	4.81899
0.120241	5.39948	3.87186	4.50912	5.22822	4.7067	4.82039
0.120601	5.39958	3.87239	4.50903	5.2292	4.707	4.82116
0.120961	5.39952	3.87274	4.50856	5.23022	4.70734	4.82123
0.121321	5.39932	3.87291	4.50781	5.23127	4.70771	4.82069
0.121681	5.39904	3.87294	4.50692	5.23232	4.70802	4.81971
0.122041	5.39877	3.87289	4.50606	5.2333	4.70818	4.81852
0.122401	5.39861	3.8728	4.50533	5.23411	4.70817	4.81731
0.122761	5.39867	3.8727	4.50485	5.23465	4.70803	4.81626
0.123121	5.39901	3.87258	4.5047	5.23487	4.70785	4.8155
0.123481	5.39966	3.87245	4.5049	5.23485	4.70771	4.81512
0.123841	5.40059	3.87232	4.50539	5.23474	4.70763	4.81519
0.124201	5.40168	3.87217	4.50603	5.23472	4.70763	4.81565
0.124561	5.4028	3.87202	4.50666	5.23493	4.70767	4.81641
0.124921	5.40383	3.87183	4.50715	5.23545	4.70773	4.81731
0.125281	5.40468	3.87158	4.50746	5.23626	4.70772	4.81817
0.125641	5.40525	3.87127	4.50761	5.23732	4.70757	4.81884
0.126001	5.40552	3.87094	4.50768	5.2385	4.70729	4.81921
0.126361	5.4055	3.87065	4.50779	5.2396	4.70694	4.81916
0.126721	5.40528	3.87045	4.50805	5.24032	4.70663	4.81864
0.127081	5.40496	3.87036	4.50854	5.24034	4.7065	4.81768
0.127441	5.40467	3.87036	4.50927	5.23951	4.70657	4.81636
0.127801	5.40447	3.87051	4.51019	5.23787	4.70693	4.81481
0.128161	5.40439	3.87082	4.51121	5.23562	4.70755	4.81319
0.128521	5.40444	3.87129	4.51214	5.23304	4.70843	4.81166
0.128881	5.40459	3.87183	4.51282	5.23038	4.70949	4.81032
0.129241	5.40475	3.87234	4.51308	5.22787	4.71057	4.80927
0.129601	5.40483	3.87272	4.51289	5.22569	4.71158	4.80857
0.129961	5.40472	3.87293	4.51226	5.22398	4.71244	4.80828
0.130321	5.40439	3.87297	4.51128	5.22282	4.71311	4.80844
0.130681	5.40384	3.87279	4.51009	5.22218	4.71357	4.80906
0.131041	5.40318	3.87233	4.50882	5.22197	4.71378	4.81013
0.131401	5.40251	3.87162	4.5077	5.22211	4.71375	4.81163
0.131761	5.40193	3.87073	4.50693	5.2225	4.71348	4.81349
0.132121	5.40156	3.86978	4.5067	5.22313	4.71303	4.81563
0.132481	5.40148	3.86886	4.50704	5.22397	4.71245	4.81794
0.132841	5.40172	3.86803	4.50793	5.22498	4.71187	4.82029
0.133201	5.40225	3.86735	4.50925	5.22602	4.71141	4.82253
0.133561	5.40296	3.86691	4.51089	5.22698	4.71113	4.8245
0.133921	5.40372	3.86679	4.51267	5.2277	4.71107	4.82606
0.134281	5.40437	3.867	4.51439	5.22813	4.71122	4.82715
0.134641	5.40479	3.86753	4.51578	5.22831	4.71159	4.82782
0.135001	5.40494	3.86833	4.5167	5.22832	4.71215	4.82808
0.135361	5.40476	3.86934	4.51706	5.22827	4.71281	4.82801
0.135721	5.40434	3.87044	4.51694	5.22828	4.71343	4.82764
0.136081	5.40379	3.87152	4.51642	5.22844	4.7139	4.82699
0.136441	5.40327	3.87247	4.51558	5.2288	4.71422	4.82613
0.136801	5.40296	3.87321	4.51449	5.22937	4.71441	4.82514
0.137161	5.40298	3.87368	4.51322	5.23012	4.71458	4.82413
0.137521	5.40339	3.87384	4.51193	5.23096	4.71478	4.82318
0.137881	5.40417	3.87369	4.51081	5.23182	4.71501	4.82234
0.138241	5.40524	3.87331	4.50995	5.23257	4.71528	4.82165
0.138601	5.40644	3.87282	4.50943	5.23316	4.71556	4.82109
0.138961	5.40757	3.87239	4.50927	5.2336	4.71587	4.82071
0.139321	5.40842	3.87211	4.50953	5.23394	4.71615	4.8205
0.139681	5.40884	3.87204	4.51023	5.23423	4.71631	4.82038
0.140041	5.4088	3.87219	4.51132	5.23444	4.7163	4.82019
0.140401	5.40835	3.8726	4.51261	5.2345	4.71609	4.81981
0.140761	5.40763	3.87322	4.51383	5.23434	4.71572	4.81917
0.141121	5.40682	3.87397	4.51475	5.23393	4.71533	4.81828
0.141481	5.40615	3.87473	4.5152	5.23329	4.71504	4.81721
0.141841	5.40578	3.87537	4.51519	5.23247	4.71495	4.816
0.142201	5.40581	3.87584	4.51482	5.23149	4.71507	4.8147
0.142561	5.40628	3.87614	4.51419	5.23044	4.71535	4.81337
0.142921	5.40711	3.87631	4.51348	5.22942	4.71575	4.81213
0.143281	5.40816	3.87637	4.51288	5.22854	4.71621	4.81117
0.143641	5.40925	3.87638	4.51251	5.22788	4.71663	4.81057
0.144001	5.41025	3.87642	4.51245	5.22743	4.71691	4.81038
0.144361	5.41106	3.87662	4.51264	5.22718	4.71693	4.81059
0.144721	5.41162	3.87704	4.51295	5.22708	4.71669	4.81122
0.145081	5.41193	3.87772	4.51325	5.22709	4.71625	4.81229
0.145441	5.41206	3.87861	4.51343	5.22724	4.71572	4.8138
0.145801	5.41201	3.87966	4.51351	5.22751	4.71517	4.81567
0.146161	5.41179	3.88081	4.51352	5.22797	4.71466	4.81774
0.146521	5.4114	3.88196	4.5135	5.22863	4.71417	4.81986
0.146881	5.41088	3.88299	4.51347	5.22947	4.71371	4.82187
0.147241	5.41022	3.88377	4.51348	5.23044	4.71326	4.82363
0.147601	5.40948	3.88421	4.51351	5.23143	4.7128	4.82497
0.147961	5.40867	3.88429	4.51357	5.23234	4.71234	4.82578
0.148321	5.40786	3.88402	4.51362	5.23304	4.7119	4.82605
0.148681	5.40711	3.88343	4.51355	5.23346	4.71154	4.82581
0.149041	5.40653	3.88256	4.51335	5.23352	4.71138	4.82517
0.149401	5.40619	3.88147	4.51305	5.23322	4.71153	4.82425
0.149761	5.40612	3.88032	4.51275	5.23262	4.71207	4.82319
0.150121	5.40628	3.87924	4.51249	5.23183	4.71299	4.82213
0.150481	5.40658	3.87836	4.51229	5.23095	4.71422	4.82123
0.150841	5.40694	3.87775	4.51216	5.23008	4.71562	4.82065
0.151201	5.40727	3.87744	4.51205	5.22935	4.71702	4.82046
0.151561	5.40755	3.8775	4.51202	5.22883	4.71827	4.8207
0.151921	5.40774	3.87793	4.51204	5.22854	4.71926	4.82134
0.152281	5.40787	3.87868	4.51208	5.22845	4.71992	4.82228
0.152641	5.40796	3.87962	4.51212	5.2285	4.72021	4.82338
0.153001	5.40811	3.88058	4.51218	5.22862	4.72015	4.82447
0.153361	5.40841	3.88142	4.51231	5.2288	4.71981	4.82538
0.153721	5.40895	3.88205	4.51252	5.22902	4.71929	4.82594
0.154081	5.40974	3.88243	4.51279	5.22926	4.71871	4.82601
0.154441	5.41069	3.88252	4.51304	5.22951	4.71814	4.82552
0.154801	5.41169	3.88235	4.51322	5.22982	4.71759	4.82453
0.155161	5.41261	3.88197	4.51327	5.23027	4.71705	4.82317
0.155521	5.41331	3.88145	4.51322	5.23091	4.71649	4.8217
0.155881	5.41366	3.88094	4.5131	5.23177	4.7159	4.82034
0.156241	5.41357	3.88048	4.51293	5.23279	4.71526	4.81929
0.156601	5.41305	3.88009	4.51275	5.2339	4.71454	4.81867
0.156961	5.41221	3.87973	4.51257	5.235	4.71375	4.81856
0.157321	5.41123	3.87934	4.5124	5.23602	4.71292	4.819
0.157681	5.41028	3.87889	4.51226	5.23688	4.71214	4.81992
0.158041	5.40952	3.8784	4.51211	5.23751	4.71154	4.82115
0.158401	5.40907	3.87789	4.51196	5.23784	4.71119	4.82249
0.158761	5.40896	3.87741	4.51183	5.23781	4.71115	4.82375
0.159121	5.40919	3.87701	4.51175	5.23744	4.71144	4.82481
0.159481	5.40964	3.87673	4.51176	5.23677	4.71203	4.82568
0.159841	5.41022	3.87665	4.51184	5.23589	4.71287	4.82634
0.160201	5.41082	3.87685	4.51193	5.23487	4.71388	4.82682
0.160561	5.41143	3.87738	4.51194	5.23385	4.71495	4.82715
0.160921	5.41208	3.87827	4.51183	5.23293	4.71603	4.82739
0.161281	5.41282	3.87943	4.51151	5.23226	4.7171	4.82759
0.161641	5.41366	3.88079	4.51095	5.23193	4.71814	4.82783
0.162001	5.41462	3.88229	4.51015	5.23201	4.71916	4.82809
0.162361	5.41564	3.88388	4.50922	5.23245	4.7201	4.82828
0.162721	5.41667	3.88553	4.50833	5.23319	4.72087	4.82828
0.163081	5.41761	3.88712	4.5077	5.23407	4.7214	4.82803
0.163441	5.41837	3.88852	4.50749	5.23493	4.72167	4.82753
0.163801	5.4189	3.88961	4.50776	5.23559	4.72161	4.82681
0.164161	5.41916	3.89032	4.50851	5.23596	4.72124	4.82591
0.164521	5.41924	3.89066	4.5097	5.23601	4.72062	4.82492
0.164881	5.4192	3.89062	4.51127	5.23576	4.71988	4.82397
0.165241	5.41915	3.89017	4.51311	5.23525	4.71922	4.8232
0.165601	5.41915	3.88936	4.51514	5.23458	4.71879	4.82275
0.165961	5.41927	3.88824	4.51723	5.23391	4.71866	4.82268
0.166321	5.41949	3.88696	4.5193	5.23338	4.71876	4.82298
0.166681	5.41977	3.88563	4.52124	5.23308	4.71901	4.82356
0.167041	5.42006	3.88434	4.52291	5.233	4.71925	4.82435
0.167401	5.42029	3.88314	4.52414	5.23309	4.71932	4.82528
0.167761	5.42044	3.88207	4.52474	5.23328	4.71912	4.82625
0.168121	5.42054	3.88119	4.52458	5.23351	4.71858	4.82718
0.168481	5.42061	3.88053	4.52359	5.2337	4.7178	4.82799
0.168841	5.4207	3.88011	4.52183	5.23374	4.71695	4.82864
0.169201	5.42086	3.87993	4.51951	5.23352	4.71626	4.82915
0.169561	5.42118	3.87999	4.51687	5.23301	4.71591	4.82954
0.169921	5.42175	3.88037	4.51422	5.23229	4.716	4.82985
0.170281	5.42262	3.88108	4.51189	5.23146	4.71655	4.83008
0.170641	5.4238	3.88209	4.51008	5.23065	4.71746	4.83019
0.171001	5.42525	3.88333	4.50893	5.22996	4.71858	4.83016
0.171361	5.4269	3.8847	4.50842	5.22946	4.71967	4.82996
0.171721	5.42864	3.88607	4.50844	5.22929	4.7205	4.82953
0.172081	5.43033	3.8873	4.50885	5.22947	4.72093	4.82884
0.172441	5.43176	3.88821	4.50954	5.22999	4.72096	4.82788
0.172801	5.43271	3.88865	4.51043	5.23071	4.72066	4.82665
0.173161	5.43302	3.88858	4.51141	5.23142	4.72017	4.82526
0.173521	5.43264	3.88807	4.51241	5.23196	4.7196	4.82383
0.173881	5.43161	3.88728	4.51333	5.23224	4.71908	4.82256
0.174241	5.43002	3.88641	4.51412	5.23219	4.71878	4.82161
0.174601	5.42808	3.88563	4.51475	5.23182	4.7188	4.82116
0.174961	5.42599	3.88515	4.5152	5.23118	4.71916	4.82128
0.175321	5.424	3.8851	4.51539	5.23045	4.71979	4.822
0.175681	5.42234	3.88553	4.51529	5.22977	4.72059	4.82323
0.176041	5.42111	3.88635	4.51491	5.22926	4.72149	4.82485
0.176401	5.42033	3.8874	4.51438	5.22901	4.72246	4.82668
0.176761	5.41992	3.88843	4.51389	5.22904	4.72348	4.82856
0.177121	5.41976	3.88923	4.51358	5.22934	4.7245	4.83026
0.177481	5.41971	3.88967	4.51352	5.22981	4.72542	4.83162
0.177841	5.41961	3.88973	4.51374	5.23036	4.72625	4.83256
0.178201	5.41933	3.88944	4.51423	5.23083	4.72699	4.83305
0.178561	5.41881	3.88891	4.51494	5.23115	4.72769	4.83319
0.178921	5.41806	3.88824	4.51578	5.2313	4.72835	4.83307
0.179281	5.41715	3.8876	4.51665	5.23131	4.729	4.8328
0.179641	5.41623	3.88709	4.51744	5.23117	4.72965	4.8325
0.180001	5.41546	3.88673	4.51812	5.23088	4.73034	4.83223
0.180361	5.41493	3.88647	4.51872	5.23052	4.73109	4.83202
0.180721	5.41477	3.8862	4.5193	5.23016	4.73192	4.83181
0.181081	5.41501	3.88582	4.51987	5.22993	4.73278	4.83154
0.181441	5.41568	3.88531	4.52042	5.22988	4.73363	4.8311
0.181801	5.41673	3.88473	4.52091	5.23009	4.7344	4.83039
0.182161	5.41806	3.88417	4.52125	5.23062	4.73502	4.82939
0.182521	5.41952	3.8837	4.52133	5.23158	4.73543	4.82819
0.182881	5.42093	3.88337	4.52102	5.23303	4.7356	4.82698
0.183241	5.42215	3.88325	4.52023	5.23494	4.73557	4.82599
0.183601	5.42305	3.88337	4.51897	5.23728	4.73539	4.82544
0.183961	5.42359	3.8837	4.51732	5.23987	4.73512	4.82543
0.184321	5.42379	3.88413	4.51545	5.24256	4.73479	4.82596
0.184681	5.42371	3.88454	4.51354	5.2451	4.73443	4.8269
0.185041	5.42347	3.88482	4.51184	5.24719	4.73406	4.82805
0.185401	5.42321	3.88492	4.51051	5.24859	4.73368	4.82914
0.185761	5.42307	3.88488	4.50967	5.24913	4.73324	4.82991
0.186121	5.42315	3.88468	4.50938	5.24881	4.73267	4.83015
0.186481	5.42343	3.88436	4.50961	5.24771	4.73196	4.82978
0.186841	5.42381	3.88394	4.51028	5.24603	4.7311	4.82887
0.187201	5.42418	3.88346	4.51123	5.244	4.73018	4.82762
0.187561	5.42442	3.88303	4.51225	5.24195	4.72925	4.82624
0.187921	5.42447	3.88276	4.51318	5.24012	4.72839	4.82497
0.188281	5.4243	3.88274	4.5139	5.23869	4.72768	4.82397
0.188641	5.42392	3.883	4.51433	5.2377	4.72718	4.82337
0.189001	5.4234	3.88353	4.5145	5.23716	4.72696	4.82321
0.189361	5.42289	3.88433	4.51441	5.23698	4.72701	4.82349
0.189721	5.42253	3.88536	4.51414	5.23711	4.72723	4.82421
0.190081	5.42244	3.88654	4.51379	5.23745	4.72753	4.82531
0.190441	5.42258	3.88772	4.51354	5.23788	4.72782	4.82675
0.190801	5.42283	3.88874	4.51356	5.23832	4.72803	4.82847
0.191161	5.42308	3.88948	4.51398	5.23872	4.72809	4.83037
0.191521	5.42323	3.88992	4.51486	5.23905	4.72799	4.83233
0.191881	5.42324	3.8901	4.51614	5.23922	4.72771	4.8342
0.192241	5.42306	3.89004	4.51772	5.23914	4.7273	4.83583
0.192601	5.42269	3.88979	4.51944	5.23867	4.72686	4.83702
0.192961	5.42215	3.88941	4.52116	5.23775	4.72645	4.83764
0.193321	5.42156	3.88892	4.52266	5.23641	4.72613	4.83766
0.193681	5.42104	3.88839	4.52372	5.23474	4.72595	4.83708
0.194041	5.4207	3.88778	4.52425	5.23291	4.72592	4.83601
0.194401	5.42051	3.88712	4.52423	5.23105	4.72599	4.83463
0.194761	5.42042	3.88641	4.52378	5.22929	4.72617	4.83317
0.195121	5.42036	3.88575	4.52302	5.22782	4.7264	4.83188
0.195481	5.42034	3.88516	4.52209	5.22673	4.72671	4.83095
0.195841	5.42035	3.88472	4.52109	5.22612	4.72711	4.83049
0.196201	5.42041	3.88444	4.52011	5.22596	4.72763	4.83053
0.196561	5.42052	3.88435	4.51922	5.22614	4.72828	4.83105
0.196921	5.42065	3.88443	4.51847	5.22658	4.72907	4.83193
0.197281	5.42077	3.88464	4.51784	5.2272	4.73002	4.83298
0.197641	5.42087	3.88488	4.51732	5.22795	4.73112	4.83399
0.198001	5.42089	3.88506	4.51693	5.22875	4.73234	4.83474
0.198361	5.4208	3.88516	4.51671	5.22951	4.73361	4.83507
0.198721	5.42057	3.8852	4.51671	5.23013	4.7348	4.8349
0.199081	5.42016	3.88523	4.51697	5.23056	4.7358	4.8342
0.199441	5.41961	3.88529	4.51744	5.23075	4.73652	4.83302
0.199801	5.419	3.88542	4.5181	5.23069	4.73692	4.83145
0.200161	5.4185	3.88566	4.51889	5.23034	4.73698	4.82964
0.200521	5.41826	3.88607	4.51974	5.22974	4.73667	4.82775
0.200881	5.4184	3.88668	4.52057	5.22894	4.736	4.82594
0.201241	5.41899	3.88746	4.52135	5.2281	4.73502	4.82438
0.201601	5.42004	3.88831	4.52205	5.22742	4.73385	4.8232
0.201961	5.42153	3.88913	4.52269	5.22706	4.73261	4.82252
0.202321	5.42336	3.88982	4.52328	5.2272	4.73142	4.82237
0.202681	5.42535	3.89033	4.5238	5.22792	4.73034	4.82273
0.203041	5.42728	3.89062	4.5242	5.22921	4.72947	4.82352
0.203401	5.42889	3.89062	4.52445	5.23099	4.72884	4.82464
0.203761	5.43002	3.89034	4.52448	5.23314	4.72847	4.82595
0.204121	5.43055	3.88985	4.52427	5.23543	4.72831	4.82724
0.204481	5.43042	3.88929	4.52381	5.23761	4.72826	4.82835
0.204841	5.4297	3.88881	4.52321	5.23943	4.72834	4.82913
0.205201	5.42853	3.8885	4.5226	5.24074	4.72856	4.82954
0.205561	5.42715	3.88836	4.52213	5.24146	4.72894	4.82962
0.205921	5.42583	3.88842	4.52196	5.24164	4.7295	4.82946
0.206281	5.42477	3.88867	4.52224	5.24135	4.73023	4.82916
0.206641	5.42413	3.88913	4.52305	5.2407	4.73108	4.82885
0.207001	5.42401	3.88972	4.52443	5.2398	4.73199	4.82863
0.207361	5.42445	3.89031	4.52631	5.2388	4.73288	4.82859
0.207721	5.42539	3.89077	4.52848	5.23785	4.73359	4.82873
0.208081	5.42662	3.89106	4.5307	5.23707	4.73394	4.82904
0.208441	5.42791	3.89118	4.53269	5.2365	4.73385	4.82948
0.208801	5.42907	3.89116	4.53419	5.23618	4.73333	4.83002
0.209161	5.43001	3.89097	4.53503	5.2361	4.7325	4.83062
0.209521	5.43068	3.89063	4.5351	5.23621	4.73155	4.83126
0.209881	5.43107	3.89018	4.53442	5.23642	4.73065	4.83187
0.210241	5.43115	3.88973	4.53311	5.23666	4.72996	4.83241
0.210601	5.431	3.88933	4.53137	5.23688	4.72958	4.8328
0.210961	5.43075	3.88903	4.52945	5.23705	4.7296	4.83301
0.211321	5.4305	3.88883	4.52762	5.23709	4.73001	4.833
0.211681	5.43031	3.88874	4.52608	5.23694	4.73074	4.83277
0.212041	5.43016	3.88876	4.52495	5.23658	4.73167	4.83235
0.212401	5.42998	3.88896	4.52425	5.2361	4.73263	4.83179
0.212761	5.42978	3.88938	4.52394	5.2356	4.7335	4.83122
0.213121	5.42956	3.89003	4.52394	5.23519	4.73423	4.83076
0.213481	5.42931	3.89088	4.52421	5.23492	4.73478	4.83046
0.213841	5.42895	3.89187	4.52464	5.23483	4.73514	4.83034
0.214201	5.42845	3.89292	4.52514	5.23495	4.73533	4.83038
0.214561	5.4278	3.89393	4.52559	5.23533	4.73535	4.83057
0.214921	5.42704	3.89473	4.52591	5.23595	4.73524	4.8309
0.215281	5.42623	3.89515	4.52606	5.23676	4.73499	4.83136
0.215641	5.42539	3.89505	4.52602	5.23765	4.73467	4.83189
0.216001	5.42456	3.89437	4.52575	5.23854	4.73434	4.83246
0.216361	5.42377	3.89315	4.52526	5.23936	4.73409	4.83305
0.216721	5.42306	3.89155	4.52459	5.24013	4.73396	4.83364
0.217081	5.42247	3.8897	4.52394	5.2408	4.73396	4.83419
0.217441	5.42198	3.88783	4.5235	5.24132	4.73403	4.83463
0.217801	5.42157	3.88613	4.52342	5.24165	4.73415	4.83493
0.218161	5.4212	3.88478	4.52377	5.24173	4.73428	4.8351
0.218521	5.42083	3.88386	4.5245	5.24152	4.73436	4.83521
0.218881	5.42043	3.88334	4.52555	5.24098	4.73433	4.83531
0.219241	5.41999	3.88315	4.52678	5.2401	4.73415	4.83549
0.219601	5.41954	3.88319	4.52802	5.23891	4.73391	4.8358
0.219961	5.41915	3.88339	4.5291	5.23752	4.73372	4.83629
0.220321	5.41891	3.88368	4.52984	5.2361	4.73374	4.83696
0.220681	5.41887	3.88403	4.53017	5.2348	4.73409	4.83778
0.221041	5.41906	3.88443	4.53016	5.23379	4.73481	4.8386
0.221401	5.41949	3.88492	4.5299	5.23314	4.7359	4.83933
0.221761	5.42011	3.88554	4.5295	5.23295	4.73728	4.8399
0.222121	5.42086	3.88637	4.52904	5.23321	4.73882	4.84027
0.222481	5.42164	3.88743	4.52859	5.23388	4.74032	4.84041
0.222841	5.42234	3.88868	4.52818	5.23485	4.74154	4.84028
0.223201	5.42282	3.89004	4.52785	5.23601	4.74234	4.83984
0.223561	5.42302	3.8914	4.5276	5.23723	4.74258	4.83906
0.223921	5.42285	3.89262	4.52742	5.23849	4.74226	4.83795
0.224281	5.42231	3.89359	4.52725	5.23971	4.74139	4.83656
0.224641	5.42143	3.89417	4.52704	5.24086	4.74008	4.83494
0.225001	5.4203	3.89429	4.52679	5.24189	4.73845	4.83323
0.225361	5.41906	3.89398	4.52653	5.24271	4.7367	4.83161
0.225721	5.41788	3.89336	4.52628	5.24327	4.73503	4.83029
0.226081	5.41696	3.89265	4.52613	5.24354	4.73363	4.82947
0.226441	5.41647	3.89206	4.52616	5.2435	4.73263	4.82929
0.226801	5.41658	3.89174	4.52641	5.24313	4.73212	4.82976
0.227161	5.41734	3.89177	4.52688	5.24241	4.73212	4.8308
0.227521	5.41869	3.89216	4.52756	5.24139	4.73262	4.83226
0.227881	5.42052	3.89284	4.5284	5.24015	4.73351	4.83397
0.228241	5.42265	3.89367	4.52935	5.23879	4.73461	4.83574
0.228601	5.42488	3.89447	4.5303	5.23739	4.73568	4.83736
0.228961	5.42699	3.89506	4.53115	5.236	4.73647	4.83876
0.229321	5.42879	3.89534	4.53178	5.23466	4.7368	4.83987
0.229681	5.43011	3.89529	4.53216	5.23343	4.7366	4.84076
0.230041	5.43089	3.89499	4.53228	5.23241	4.73589	4.84149
0.230401	5.43116	3.89454	4.53215	5.23163	4.7348	4.84211
0.230761	5.43101	3.89407	4.53175	5.23108	4.73348	4.84262
0.231121	5.43056	3.89366	4.53109	5.23071	4.73218	4.843
0.231481	5.42996	3.89334	4.53017	5.23045	4.73112	4.84321
0.231841	5.42938	3.8931	4.52904	5.23031	4.73049	4.84322
0.232201	5.42904	3.89291	4.52774	5.23028	4.73046	4.84298
0.232561	5.42909	3.89273	4.52638	5.23034	4.73105	4.84248
0.232921	5.42961	3.89249	4.5251	5.23047	4.73223	4.84175
0.233281	5.43061	3.8922	4.52403	5.23066	4.73387	4.84086
0.233641	5.43198	3.89183	4.52335	5.23096	4.73576	4.83996
0.234001	5.43362	3.89148	4.52316	5.23141	4.73772	4.83918
0.234361	5.43537	3.89121	4.5235	5.23202	4.73961	4.83862
0.234722	5.43702	3.89114	4.52433	5.23273	4.74128	4.83835
0.235082	5.43839	3.8913	4.52557	5.23347	4.74262	4.83835
0.235442	5.43938	3.89174	4.52706	5.23416	4.74349	4.83857
0.235802	5.43991	3.89242	4.52861	5.23475	4.74385	4.83891
0.236162	5.44001	3.89329	4.53008	5.23522	4.74374	4.83925
0.236522	5.43978	3.89431	4.53137	5.23554	4.74328	4.83947
0.236882	5.43926	3.89538	4.53243	5.23571	4.74261	4.83947
0.237242	5.43854	3.89646	4.53326	5.23578	4.74182	4.83921
0.237602	5.43764	3.89743	4.53389	5.2358	4.74099	4.83867
0.237962	5.43652	3.89823	4.53432	5.23583	4.74023	4.83792
0.238322	5.43514	3.89883	4.53459	5.23591	4.73964	4.83708
0.238682	5.43346	3.89928	4.53472	5.23606	4.73928	4.83629
0.239042	5.43152	3.89962	4.53473	5.2363	4.73916	4.83561
0.239402	5.42942	3.89992	4.53461	5.23662	4.7392	4.83512
0.239762	5.42734	3.90022	4.5344	5.23697	4.73934	4.83478
0.240122	5.42553	3.90055	4.53411	5.23729	4.73961	4.83455
0.240482	5.42423	3.9009	4.53379	5.23755	4.74002	4.8344
0.240842	5.42366	3.90126	4.53345	5.23773	4.74061	4.83427
0.241202	5.42395	3.90159	4.5331	5.23783	4.74141	4.83417
0.241562	5.42508	3.90182	4.53274	5.23786	4.7424	4.83409
0.241922	5.42697	3.90194	4.53236	5.23779	4.74356	4.83405
0.242282	5.42935	3.90193	4.53195	5.23763	4.7448	4.83412
0.242642	5.43196	3.9018	4.53148	5.23745	4.746	4.83434
0.243002	5.43452	3.90152	4.53091	5.23735	4.74702	4.83477
0.243362	5.43684	3.90109	4.53024	5.23739	4.74769	4.83541
0.243722	5.43878	3.90053	4.52949	5.23754	4.74789	4.83621
0.244082	5.44027	3.89984	4.52874	5.23776	4.74755	4.83705
0.244442	5.44128	3.89897	4.52803	5.23797	4.74674	4.83777
0.244802	5.44183	3.89783	4.52744	5.23815	4.74557	4.83826
0.245162	5.44196	3.8964	4.527	5.23826	4.74425	4.83845
0.245522	5.44171	3.89475	4.52679	5.2383	4.74294	4.83834
0.245882	5.44114	3.89302	4.52685	5.23825	4.74176	4.8379
0.246242	5.44029	3.89141	4.52719	5.23811	4.74083	4.83715
0.246602	5.43923	3.89008	4.5278	5.23799	4.74018	4.83615
0.246962	5.43805	3.88916	4.52861	5.23797	4.73987	4.83501
0.247322	5.43686	3.88877	4.52958	5.23812	4.73983	4.83391
0.247682	5.43574	3.88898	4.53063	5.23842	4.73996	4.83298
0.248042	5.43479	3.88972	4.53167	5.23877	4.74016	4.83226
0.248402	5.43403	3.89089	4.53259	5.239	4.74032	4.83174
0.248762	5.43348	3.89232	4.53325	5.239	4.7404	4.83144
0.249122	5.43309	3.89384	4.53355	5.23871	4.74031	4.83138
0.249482	5.43288	3.89535	4.53343	5.23812	4.74	4.83155
0.249842	5.4328	3.89677	4.53286	5.23733	4.73941	4.83191
0.250202	5.43284	3.89813	4.53188	5.23646	4.73856	4.83241
0.250562	5.43296	3.89944	4.53057	5.23569	4.73757	4.83304
0.250922	5.43312	3.9007	4.52902	5.23518	4.73656	4.83385
0.251282	5.43325	3.9019	4.52738	5.23506	4.73568	4.83485
0.251642	5.43329	3.90298	4.52576	5.23543	4.73502	4.83603
0.252002	5.43323	3.90391	4.52426	5.23617	4.73465	4.83732
0.252362	5.43303	3.90463	4.523	5.23711	4.73459	4.83862
0.252722	5.4327	3.90515	4.52206	5.23802	4.73478	4.83984
0.253082	5.43224	3.9054	4.52154	5.23867	4.73511	4.84087
0.253442	5.43173	3.9054	4.52152	5.23897	4.73546	4.84164
0.253802	5.43127	3.90513	4.52208	5.23891	4.73572	4.84213
0.254162	5.43091	3.90465	4.52322	5.23863	4.73584	4.84235
0.254522	5.43066	3.90404	4.52489	5.23833	4.7358	4.84238
0.254882	5.43048	3.90335	4.52698	5.23828	4.73565	4.84235
0.255242	5.43038	3.90258	4.52935	5.23867	4.73548	4.84232
0.255602	5.43035	3.90177	4.53177	5.23964	4.73537	4.84237
0.255962	5.43045	3.90096	4.534	5.24118	4.73543	4.84251
0.256322	5.43077	3.90018	4.53582	5.24311	4.7357	4.84272
0.256682	5.43135	3.89953	4.53707	5.24514	4.73624	4.84298
0.257042	5.43224	3.89902	4.53768	5.24691	4.737	4.84324
0.257402	5.43344	3.8987	4.53768	5.24808	4.73792	4.84349
0.257762	5.43494	3.89855	4.53717	5.24839	4.73897	4.84368
0.258122	5.43665	3.89858	4.53626	5.24775	4.74011	4.84378
0.258482	5.43838	3.89878	4.5351	5.2463	4.74132	4.84375
0.258842	5.43991	3.8991	4.53383	5.24433	4.74259	4.84355
0.259202	5.44103	3.89947	4.53262	5.2422	4.74386	4.84315
0.259562	5.44165	3.89982	4.53158	5.24028	4.7451	4.8425
0.259922	5.44175	3.90009	4.53075	5.23881	4.74629	4.84158
0.260282	5.44138	3.90022	4.53014	5.23792	4.74742	4.84043
0.260642	5.44063	3.90015	4.52978	5.23764	4.74845	4.83913
0.261002	5.43963	3.89982	4.5297	5.23788	4.74931	4.83782
0.261362	5.43854	3.89921	4.52994	5.23848	4.74997	4.83662
0.261722	5.43753	3.89839	4.53052	5.23919	4.75037	4.83567
0.262082	5.43671	3.89749	4.5314	5.23983	4.75053	4.835
0.262442	5.43612	3.89665	4.53252	5.24035	4.75043	4.83465
0.262802	5.43572	3.89596	4.53385	5.24079	4.75008	4.83454
0.263162	5.43551	3.8955	4.53537	5.2413	4.74949	4.83454
0.263522	5.43545	3.89534	4.53697	5.24191	4.74871	4.83452
0.263882	5.4355	3.89556	4.53858	5.24262	4.74777	4.83436
0.264242	5.43554	3.89617	4.54004	5.24333	4.74671	4.83399
0.264602	5.43548	3.89704	4.54119	5.24401	4.74556	4.83343
0.264962	5.43524	3.89794	4.54192	5.24461	4.74436	4.83273
0.265322	5.43486	3.89875	4.54214	5.24509	4.7432	4.83201
0.265682	5.43439	3.8994	4.5418	5.24541	4.74217	4.83139
0.266042	5.43391	3.89993	4.54093	5.24556	4.74136	4.83099
0.266402	5.43349	3.9004	4.5396	5.24561	4.74085	4.83093
0.266762	5.43322	3.90081	4.53798	5.24562	4.7407	4.83129
0.267122	5.43319	3.90118	4.53624	5.2457	4.74091	4.83207
0.267482	5.43349	3.90156	4.53456	5.24586	4.74145	4.83324
0.267842	5.43413	3.90202	4.53312	5.24608	4.74221	4.83467
0.268202	5.43501	3.90255	4.53205	5.24628	4.7431	4.83623
0.268562	5.43599	3.90306	4.53135	5.2464	4.74399	4.83776
0.268922	5.43686	3.90335	4.53103	5.24634	4.74478	4.83913
0.269282	5.43749	3.9033	4.53102	5.24606	4.74539	4.84022
0.269642	5.43773	3.90289	4.53125	5.24556	4.74581	4.841
0.270002	5.43753	3.90223	4.53161	5.24488	4.74609	4.84145
0.270362	5.43684	3.90147	4.53202	5.2441	4.74626	4.84162
0.270722	5.43576	3.90078	4.5324	5.24331	4.74636	4.84161
0.271082	5.43454	3.90032	4.53265	5.24259	4.74638	4.84152
0.271442	5.4335	3.90019	4.5328	5.24201	4.74635	4.84141
0.271802	5.43295	3.90053	4.53286	5.24163	4.74629	4.84132
0.272162	5.43308	3.90132	4.53293	5.24147	4.74619	4.84128
0.272522	5.43395	3.90247	4.53313	5.24156	4.74604	4.84126
0.272882	5.43551	3.90377	4.53355	5.2419	4.74579	4.84126
0.273242	5.43759	3.90493	4.53432	5.24243	4.74546	4.84125
0.273602	5.4399	3.90577	4.53545	5.24309	4.74511	4.84124
0.273962	5.44207	3.90619	4.53693	5.24379	4.74482	4.84127
0.274322	5.44379	3.90621	4.53866	5.24448	4.74471	4.84138
0.274682	5.44488	3.90595	4.5404	5.24513	4.74483	4.84155
0.275042	5.44528	3.90553	4.5419	5.24566	4.74527	4.84176
0.275402	5.44508	3.90509	4.5429	5.24599	4.74606	4.84192
0.275762	5.44439	3.90478	4.5432	5.24606	4.74722	4.84196
0.276122	5.44338	3.90472	4.54275	5.24584	4.74871	4.8418
0.276482	5.44221	3.90497	4.5416	5.24535	4.75039	4.84143
0.276842	5.44102	3.90553	4.53994	5.24461	4.75209	4.84081
0.277202	5.43991	3.90623	4.53806	5.24367	4.75364	4.83997
0.277562	5.43893	3.90692	4.53629	5.24261	4.75488	4.83895
0.277922	5.43811	3.90745	4.53493	5.24151	4.7557	4.83786
0.278282	5.43747	3.90778	4.53415	5.24051	4.75602	4.8368
0.278642	5.43706	3.90788	4.53401	5.23973	4.75581	4.83582
0.279002	5.43689	3.90776	4.53444	5.23926	4.75509	4.83495
0.279362	5.43696	3.90739	4.53525	5.23912	4.75391	4.83418
0.279722	5.4372	3.90682	4.53624	5.23927	4.75237	4.83351
0.280082	5.43747	3.9061	4.53718	5.23961	4.7506	4.83294
0.280442	5.43764	3.90534	4.5379	5.24002	4.7487	4.83252
0.280802	5.4376	3.90468	4.5383	5.24038	4.7468	4.8323
0.281162	5.43728	3.90416	4.53836	5.24057	4.74501	4.83232
0.281522	5.43674	3.90384	4.53815	5.24058	4.74346	4.83261
0.281882	5.43608	3.90373	4.53777	5.24043	4.74225	4.83316
0.282242	5.43551	3.90392	4.53731	5.24024	4.7415	4.83394
0.282602	5.43526	3.90442	4.53688	5.2401	4.74125	4.83489
0.282962	5.43551	3.90522	4.53652	5.24015	4.74142	4.83594
0.283322	5.43637	3.90627	4.53627	5.24047	4.74188	4.83699
0.283682	5.43782	3.90745	4.53609	5.24111	4.74246	4.83796
0.284042	5.43975	3.90867	4.53596	5.242	4.74297	4.83876
0.284402	5.44193	3.90984	4.53586	5.24305	4.74323	4.83939
0.284762	5.44408	3.91091	4.53575	5.24406	4.74312	4.83979
0.285122	5.44593	3.91186	4.53563	5.24487	4.74254	4.83996
0.285482	5.44726	3.9127	4.53549	5.24534	4.74157	4.83985
0.285842	5.44792	3.91343	4.53534	5.24535	4.74032	4.83947
0.286202	5.44789	3.91405	4.53524	5.24492	4.73902	4.83885
0.286562	5.44723	3.91457	4.53528	5.2441	4.73794	4.83805
0.286922	5.44605	3.91495	4.53553	5.24305	4.73731	4.83713
0.287282	5.44451	3.91514	4.53602	5.24193	4.73731	4.83617
0.287642	5.44284	3.91507	4.53673	5.24091	4.73802	4.83524
0.288002	5.44119	3.91468	4.53764	5.24014	4.73942	4.83444
0.288362	5.43969	3.91396	4.53869	5.23971	4.74138	4.83386
0.288722	5.43839	3.91303	4.53982	5.23965	4.74367	4.83351
0.289082	5.43731	3.91203	4.54088	5.2399	4.74598	4.83338
0.289442	5.43638	3.91116	4.54172	5.24039	4.74802	4.83339
0.289802	5.43557	3.91057	4.5422	5.24104	4.74954	4.8335
0.290162	5.43479	3.91038	4.54224	5.24175	4.7504	4.83369
0.290522	5.43401	3.91061	4.54187	5.24247	4.7506	4.83397
0.290882	5.4332	3.91122	4.54115	5.24315	4.75023	4.83434
0.291242	5.43241	3.91206	4.54018	5.24371	4.74948	4.83484
0.291602	5.43171	3.91294	4.53908	5.24415	4.74852	4.83549
0.291962	5.43122	3.91364	4.53808	5.24449	4.74753	4.83637
0.292322	5.43107	3.91406	4.53739	5.24473	4.74668	4.83752
0.292682	5.43131	3.91421	4.53717	5.24492	4.74604	4.83891
0.293042	5.43193	3.91417	4.53747	5.24507	4.74569	4.84044
0.293402	5.43286	3.91408	4.53825	5.24521	4.74562	4.84198
0.293762	5.43401	3.91405	4.53939	5.24544	4.74581	4.84341
0.294122	5.43529	3.91421	4.54078	5.24585	4.74624	4.8446
0.294482	5.43657	3.91461	4.54222	5.24649	4.74691	4.84546
0.294842	5.43771	3.91521	4.54355	5.24735	4.74779	4.84588
0.295202	5.4386	3.91593	4.54463	5.24837	4.74883	4.84584
0.295562	5.43922	3.91662	4.5454	5.24948	4.74994	4.84537
0.295922	5.43958	3.91717	4.54587	5.2506	4.75102	4.84461
0.296282	5.43974	3.9175	4.54612	5.25163	4.75193	4.84365
0.296642	5.43974	3.91757	4.54621	5.25241	4.75255	4.84262
0.297002	5.43965	3.91741	4.54616	5.25275	4.75283	4.84163
0.297362	5.43958	3.91706	4.54597	5.25255	4.75277	4.84078
0.297722	5.43966	3.91656	4.54568	5.25175	4.75245	4.84014
0.298082	5.44001	3.91591	4.54534	5.25044	4.75197	4.83976
0.298442	5.44065	3.91513	4.54499	5.24866	4.75143	4.83963
0.298802	5.44151	3.9142	4.54466	5.24653	4.75099	4.83969
0.299162	5.44249	3.91311	4.5444	5.24417	4.75071	4.8399
0.299522	5.44343	3.91191	4.54431	5.24177	4.75062	4.84022
0.299882	5.44416	3.91067	4.54446	5.23949	4.75066	4.84062
0.300242	5.4445	3.9095	4.54491	5.23747	4.75072	4.84108
0.300602	5.4443	3.90851	4.54561	5.23577	4.75067	4.84154
0.300962	5.44351	3.90781	4.54643	5.23443	4.75042	4.84199
0.301322	5.44215	3.90745	4.54727	5.23348	4.74991	4.84242
0.301682	5.4404	3.90744	4.54801	5.23297	4.74911	4.84285
0.302042	5.43851	3.90778	4.54851	5.23294	4.74804	4.84327
0.302402	5.43675	3.9084	4.54866	5.23342	4.74679	4.84366
0.302762	5.43544	3.90923	4.54833	5.23443	4.74547	4.844
0.303122	5.43478	3.91018	4.54751	5.23593	4.74422	4.84427
0.303482	5.43491	3.91116	4.54628	5.23784	4.74313	4.84449
0.303842	5.43584	3.91212	4.54469	5.23997	4.74231	4.84464
0.304202	5.43752	3.91303	4.54284	5.24204	4.74178	4.8447
0.304562	5.43971	3.91386	4.5408	5.24376	4.7415	4.84461
0.304922	5.44215	3.91459	4.53869	5.24486	4.74146	4.84434
0.305282	5.44456	3.91518	4.53665	5.24519	4.7416	4.8439
0.305642	5.44667	3.91562	4.53483	5.24474	4.74193	4.84332
0.306002	5.44832	3.9159	4.53332	5.24359	4.74243	4.84257
0.306362	5.44937	3.91605	4.53216	5.24195	4.74314	4.84161
0.306722	5.44981	3.91613	4.5314	5.24012	4.74406	4.84043
0.307082	5.44973	3.91613	4.53108	5.23841	4.74522	4.83909
0.307442	5.44929	3.91607	4.53125	5.23705	4.74658	4.83767
0.307802	5.44869	3.91597	4.53195	5.23616	4.74806	4.83625
0.308162	5.44814	3.91586	4.53314	5.23579	4.74948	4.83485
0.308522	5.44773	3.9157	4.53478	5.23584	4.75066	4.83354
0.308882	5.44754	3.91549	4.53678	5.23625	4.75143	4.83241
0.309242	5.44754	3.91518	4.53909	5.23686	4.75169	4.83163
0.309602	5.44767	3.91477	4.54162	5.23759	4.75146	4.83133
0.309962	5.44783	3.91432	4.54423	5.23834	4.75082	4.83156
0.310322	5.44792	3.91392	4.54675	5.23911	4.74995	4.83231
0.310682	5.44787	3.91364	4.54905	5.23992	4.74902	4.83347
0.311042	5.44765	3.91352	4.55105	5.24073	4.74825	4.83493
0.311402	5.4473	3.91359	4.5527	5.24148	4.74777	4.83651
0.311762	5.44695	3.91389	4.554	5.24213	4.74763	4.83803
0.312122	5.4467	3.91438	4.55492	5.24265	4.74777	4.83927
0.312482	5.44659	3.91499	4.55546	5.24309	4.7481	4.84005
0.312842	5.44667	3.91563	4.55565	5.24347	4.74853	4.84031
0.313202	5.44687	3.91623	4.55554	5.24384	4.74897	4.84008
0.313562	5.44716	3.91678	4.55511	5.24423	4.74936	4.83945
0.313922	5.44749	3.91731	4.55436	5.24468	4.74972	4.8386
0.314282	5.44778	3.91788	4.55328	5.24529	4.75007	4.83766
0.314642	5.44795	3.91855	4.55188	5.24603	4.7505	4.83676
0.315002	5.44794	3.91933	4.55027	5.24682	4.75099	4.83599
0.315362	5.44778	3.92024	4.54854	5.24748	4.75151	4.83545
0.315722	5.44751	3.92124	4.54683	5.24787	4.75195	4.83519
0.316082	5.44721	3.92225	4.54528	5.24793	4.75222	4.83523
0.316442	5.44692	3.92314	4.54406	5.24769	4.75224	4.83551
0.316802	5.44665	3.92381	4.54335	5.24722	4.75197	4.83598
0.317162	5.44638	3.92418	4.54324	5.24659	4.75144	4.83655
0.317522	5.4461	3.92424	4.54375	5.24588	4.75072	4.83719
0.317882	5.44581	3.92404	4.54481	5.24519	4.74998	4.83784
0.318242	5.44555	3.92368	4.54628	5.24461	4.74939	4.8385
0.318602	5.44534	3.92324	4.54807	5.2442	4.74913	4.83914
0.318962	5.4452	3.92276	4.55	5.24395	4.74928	4.8398
0.319322	5.44518	3.92228	4.55186	5.24384	4.74985	4.8405
0.319682	5.44533	3.92182	4.55345	5.24381	4.75075	4.84123
0.320042	5.44565	3.92141	4.55462	5.24382	4.75184	4.842
0.320402	5.44612	3.92102	4.55528	5.24383	4.75298	4.84273
0.320762	5.44671	3.92061	4.55543	5.24381	4.75398	4.84341
0.321122	5.44736	3.9202	4.55506	5.24375	4.7547	4.84394
0.321482	5.44805	3.91986	4.55421	5.24363	4.75504	4.84425
0.321842	5.44874	3.91968	4.55292	5.24336	4.75495	4.84425
0.322202	5.4494	3.91977	4.55133	5.2429	4.75451	4.84396
0.322562	5.44999	3.92013	4.54958	5.24228	4.7538	4.84339
0.322922	5.45045	3.92071	4.54786	5.24159	4.75292	4.84262
0.323282	5.45071	3.92144	4.54637	5.24101	4.75193	4.84174
0.323642	5.45073	3.92219	4.54528	5.24064	4.75093	4.84085
0.324002	5.45052	3.92283	4.54468	5.24061	4.74998	4.84004
0.324362	5.45011	3.92317	4.54461	5.24096	4.7492	4.83935
0.324722	5.44954	3.92308	4.54504	5.2417	4.74861	4.83879
0.325082	5.44892	3.92251	4.5459	5.24277	4.74821	4.83839
0.325442	5.44835	3.92154	4.54708	5.24402	4.748	4.83813
0.325802	5.44794	3.92034	4.54841	5.24521	4.74796	4.83803
0.326162	5.44778	3.91913	4.54967	5.24612	4.74811	4.83803
0.326522	5.44792	3.9181	4.5507	5.24657	4.74836	4.83813
0.326882	5.44835	3.9174	4.55141	5.24649	4.74859	4.83832
0.327242	5.449	3.91712	4.55184	5.24592	4.74864	4.83863
0.327602	5.44978	3.91728	4.5521	5.24502	4.74841	4.8391
0.327962	5.45059	3.9178	4.55231	5.24395	4.74783	4.83974
0.328322	5.45135	3.91849	4.55261	5.24288	4.74688	4.84055
0.328682	5.45204	3.91913	4.55313	5.24194	4.74557	4.84151
0.329042	5.45271	3.91952	4.55392	5.24116	4.74401	4.84261
0.329402	5.45338	3.91958	4.555	5.24057	4.74235	4.84385
0.329762	5.45404	3.91933	4.55625	5.24013	4.7408	4.84518
0.330122	5.45467	3.91887	4.55753	5.23978	4.73957	4.84653
0.330482	5.45527	3.91829	4.5586	5.23937	4.7388	4.84787
0.330842	5.45583	3.91772	4.55927	5.23881	4.73861	4.84912
0.331202	5.45632	3.91729	4.55939	5.23809	4.73901	4.85027
0.331562	5.45667	3.91709	4.5589	5.23738	4.73992	4.8512
0.331922	5.45676	3.91712	4.55785	5.23692	4.74122	4.85184
0.332282	5.45654	3.91729	4.55638	5.23687	4.74268	4.85209
0.332642	5.45598	3.91745	4.55468	5.23733	4.74413	4.8519
0.333002	5.45511	3.91747	4.55291	5.23831	4.74539	4.85125
0.333362	5.45393	3.9173	4.55124	5.23971	4.74636	4.85013
0.333722	5.45248	3.91697	4.54977	5.24142	4.74693	4.84858
0.334082	5.4508	3.91655	4.54859	5.24321	4.74706	4.84673
0.334442	5.44899	3.91616	4.54776	5.2448	4.7468	4.84477
0.334802	5.4472	3.91591	4.54729	5.24591	4.74622	4.84291
0.335162	5.44559	3.91589	4.54713	5.24639	4.74544	4.84129
0.335522	5.44429	3.91619	4.54727	5.24624	4.74454	4.84001
0.335882	5.44341	3.91681	4.54771	5.24561	4.74362	4.83909
0.336242	5.44295	3.91766	4.54841	5.2447	4.74277	4.8385
0.336602	5.44289	3.91862	4.54934	5.24373	4.74209	4.83819
0.336962	5.44313	3.91955	4.55042	5.24285	4.74166	4.83809
0.337322	5.44357	3.92033	4.55158	5.24219	4.74151	4.83811
0.337682	5.44413	3.92082	4.55269	5.24182	4.74162	4.83819
0.338042	5.44472	3.92096	4.55366	5.24178	4.74194	4.83836
0.338402	5.4453	3.92076	4.55446	5.24206	4.7424	4.83865
0.338762	5.44581	3.92031	4.55505	5.24261	4.74296	4.83907
0.339122	5.44633	3.91976	4.55548	5.24333	4.74358	4.83956
0.339482	5.44694	3.91926	4.55583	5.24412	4.74417	4.84005
0.339842	5.44772	3.91895	4.55613	5.24489	4.74468	4.84045
0.340202	5.44866	3.91892	4.55638	5.24557	4.74509	4.8407
0.340562	5.44975	3.91922	4.55652	5.24602	4.74541	4.84077
0.340922	5.45088	3.91985	4.55653	5.24613	4.74569	4.84062
0.341282	5.45197	3.9207	4.55633	5.24579	4.74597	4.8403
0.341642	5.45291	3.92163	4.5559	5.24498	4.74623	4.83989
0.342002	5.4536	3.92246	4.5552	5.24375	4.74647	4.83952
0.342362	5.45396	3.92303	4.55424	5.2422	4.74662	4.83927
0.342722	5.45397	3.92323	4.55311	5.24051	4.7467	4.83916
0.343082	5.45362	3.92309	4.55201	5.23883	4.74671	4.83918
0.343442	5.45298	3.92271	4.55113	5.23735	4.74665	4.83926
0.343802	5.45209	3.92227	4.55067	5.23623	4.74647	4.83931
0.344162	5.45102	3.92188	4.55065	5.23558	4.74616	4.83931
0.344522	5.44981	3.92162	4.55106	5.23544	4.7457	4.83922
0.344882	5.4485	3.92155	4.55177	5.23579	4.74516	4.83915
0.345242	5.4471	3.92173	4.55263	5.23655	4.7446	4.83918
0.345602	5.44568	3.92215	4.55347	5.23763	4.74408	4.83936
0.345962	5.44431	3.92272	4.55409	5.23899	4.74361	4.83975
0.346322	5.44305	3.92326	4.55436	5.24052	4.74325	4.84033
0.346682	5.44198	3.92361	4.55418	5.24216	4.74308	4.8411
0.347042	5.44109	3.92373	4.55361	5.24383	4.74318	4.84195
0.347402	5.44044	3.92368	4.55277	5.24545	4.74362	4.84274
0.347762	5.44009	3.92352	4.55185	5.24697	4.74437	4.84326
0.348122	5.44006	3.92329	4.55103	5.24836	4.74539	4.84338
0.348482	5.44035	3.92297	4.55045	5.24954	4.74653	4.84306
0.348842	5.4409	3.92257	4.55019	5.2505	4.74769	4.84236
0.349202	5.4416	3.92219	4.55031	5.25115	4.74872	4.84141
0.349562	5.44239	3.92188	4.55086	5.25144	4.74949	4.84026
0.349922	5.44321	3.92166	4.55179	5.25134	4.74988	4.83905
0.350282	5.44403	3.92149	4.553	5.25088	4.74977	4.83789
0.350642	5.44479	3.92135	4.55435	5.25011	4.74916	4.83692
0.351002	5.44541	3.92126	4.5557	5.24909	4.74814	4.8362
0.351362	5.44589	3.92126	4.55702	5.24791	4.74692	4.83572
0.351722	5.44623	3.92139	4.55832	5.24668	4.74572	4.83544
0.352082	5.44646	3.92165	4.55962	5.24555	4.74477	4.83528
0.352442	5.44664	3.922	4.56095	5.24468	4.74428	4.83523
0.352802	5.44679	3.92242	4.56229	5.24416	4.74438	4.83525
0.353162	5.4469	3.9229	4.56364	5.24396	4.74513	4.83533
0.353522	5.44695	3.92341	4.56492	5.24402	4.74644	4.83546
0.353882	5.44687	3.92396	4.56602	5.24423	4.74809	4.83565
0.354242	5.44667	3.92452	4.56678	5.2445	4.74979	4.83591
0.354602	5.44636	3.9251	4.56706	5.24475	4.75123	4.83627
0.354962	5.44598	3.92569	4.56681	5.2449	4.75213	4.83671
0.355322	5.44553	3.92631	4.5661	5.24495	4.75234	4.83723
0.355682	5.44504	3.92696	4.5651	5.24493	4.7518	4.83778
0.356042	5.44456	3.92761	4.56406	5.24492	4.7506	4.83837
0.356402	5.44418	3.9282	4.56322	5.24502	4.74895	4.83896
0.356762	5.444	3.92865	4.56284	5.24527	4.74712	4.83954
0.357122	5.44407	3.92894	4.56306	5.24567	4.74536	4.84007
0.357482	5.4444	3.92904	4.56395	5.24616	4.74396	4.84052
0.357842	5.44493	3.92895	4.56538	5.24666	4.74311	4.84087
0.358202	5.44564	3.92864	4.56709	5.2471	4.7429	4.84113
0.358562	5.44646	3.9281	4.56877	5.2474	4.74331	4.84128
0.358922	5.44738	3.92739	4.57006	5.24756	4.74424	4.84136
0.359282	5.44832	3.92659	4.5707	5.24759	4.74548	4.84139
0.359642	5.44921	3.92581	4.57056	5.24751	4.74681	4.84149
0.360002	5.44997	3.9251	4.56961	5.24738	4.748	4.8417
0.360362	5.45055	3.92449	4.56797	5.24724	4.74885	4.84207
0.360722	5.4509	3.92404	4.56582	5.24716	4.74923	4.8426
0.361082	5.45101	3.92378	4.56344	5.24713	4.74908	4.84324
0.361442	5.45087	3.92368	4.56115	5.24713	4.74843	4.84391
0.361802	5.45044	3.92367	4.55922	5.24713	4.74741	4.84449
0.362162	5.44972	3.92364	4.55784	5.24709	4.7462	4.84489
0.362522	5.44873	3.92351	4.557	5.24701	4.74497	4.84505
0.362882	5.44754	3.92326	4.55662	5.24691	4.7439	4.84493
0.363242	5.44621	3.92287	4.55655	5.24679	4.74315	4.84461
0.363602	5.44485	3.92238	4.55667	5.24663	4.74281	4.84419
0.363962	5.44356	3.92184	4.55686	5.24643	4.7429	4.84384
0.364322	5.44243	3.92139	4.55706	5.24616	4.74342	4.84368
0.364682	5.44155	3.92116	4.55721	5.2458	4.74429	4.84376
0.365042	5.44095	3.92128	4.55736	5.24536	4.74545	4.84408
0.365402	5.44063	3.92179	4.55757	5.24479	4.7468	4.84455
0.365762	5.44057	3.92269	4.55793	5.24409	4.74827	4.84503
0.366122	5.44072	3.9239	4.55842	5.24325	4.74975	4.84538
0.366482	5.44098	3.92534	4.55896	5.24232	4.75113	4.84545
0.366842	5.44124	3.92683	4.55941	5.24135	4.75233	4.84511
0.367202	5.44145	3.9282	4.55961	5.24037	4.75324	4.84436
0.367562	5.44158	3.92931	4.55949	5.23947	4.75379	4.84324
0.367922	5.44168	3.93002	4.559	5.23872	4.75391	4.84194
0.368282	5.44177	3.93028	4.55821	5.23817	4.75355	4.84068
0.368642	5.44189	3.93008	4.55729	5.2379	4.75271	4.8397
0.369002	5.44202	3.9295	4.55638	5.23791	4.75143	4.83917
0.369362	5.44215	3.92863	4.55568	5.23821	4.74982	4.83921
0.369722	5.44224	3.92762	4.55529	5.2388	4.74804	4.8398
0.370082	5.4422	3.92661	4.55525	5.23969	4.74626	4.84083
0.370442	5.44191	3.9257	4.55555	5.24081	4.74464	4.84218
0.370802	5.44133	3.92493	4.5561	5.24206	4.74335	4.84366
0.371162	5.44052	3.92436	4.5568	5.2433	4.74253	4.84511
0.371522	5.43955	3.92401	4.55754	5.24445	4.74226	4.84631
0.371882	5.43854	3.92393	4.55828	5.2455	4.74252	4.84716
0.372242	5.43758	3.92413	4.55897	5.24639	4.74318	4.8476
0.372602	5.43679	3.92461	4.55967	5.24703	4.74408	4.84766
0.372962	5.43627	3.92538	4.56039	5.24731	4.74499	4.84745
0.373322	5.43613	3.92646	4.56114	5.24721	4.74573	4.84703
0.373682	5.43638	3.9278	4.56193	5.24679	4.74612	4.84644
0.374042	5.43697	3.9293	4.56273	5.24617	4.74606	4.84574
0.374402	5.43786	3.93074	4.56355	5.24547	4.74552	4.84499
0.374762	5.439	3.93192	4.56436	5.24477	4.74458	4.84426
0.375122	5.44036	3.93264	4.56519	5.24418	4.74337	4.8436
0.375482	5.44186	3.93281	4.56597	5.2438	4.74214	4.84304
0.375842	5.44338	3.93242	4.56668	5.24368	4.74106	4.84254
0.376202	5.44477	3.93155	4.56728	5.24383	4.74031	4.8421
0.376562	5.44589	3.93033	4.56776	5.24414	4.73998	4.84172
0.376922	5.44668	3.92898	4.56805	5.24446	4.74009	4.84139
0.377282	5.44707	3.92772	4.56809	5.24465	4.74058	4.84108
0.377642	5.44705	3.92672	4.56786	5.2446	4.74133	4.84073
0.378002	5.44664	3.92604	4.56737	5.24423	4.74216	4.84033
0.378362	5.44598	3.92569	4.56668	5.24358	4.74287	4.83987
0.378722	5.44519	3.9256	4.56583	5.24274	4.74329	4.83943
0.379082	5.44446	3.92569	4.56486	5.24184	4.74331	4.83906
0.379442	5.44392	3.92587	4.56379	5.24101	4.74293	4.83882
0.379802	5.44368	3.92604	4.56268	5.24043	4.74217	4.83879
0.380162	5.44376	3.92622	4.56155	5.24023	4.74111	4.83904
0.380522	5.4441	3.92638	4.56037	5.24054	4.73986	4.83963
0.380882	5.44455	3.92663	4.55911	5.24139	4.73853	4.84049
0.381242	5.445	3.92703	4.55773	5.24274	4.73724	4.84155
0.381602	5.44535	3.92765	4.55627	5.24447	4.73604	4.84266
0.381962	5.44555	3.92849	4.55483	5.24643	4.73498	4.84371
0.382322	5.44558	3.92958	4.55344	5.24841	4.7341	4.84456
0.382682	5.44544	3.9309	4.55222	5.25022	4.73347	4.84517
0.383042	5.44519	3.9324	4.55124	5.25168	4.73314	4.84548
0.383402	5.44491	3.93398	4.55063	5.25267	4.73318	4.84548
0.383762	5.44471	3.93549	4.55046	5.25311	4.73365	4.84523
0.384122	5.44462	3.93686	4.55074	5.25302	4.73457	4.84478
0.384482	5.44459	3.93803	4.55149	5.25248	4.73593	4.84424
0.384842	5.44456	3.93906	4.55268	5.25161	4.7376	4.84369
0.385202	5.44446	3.93998	4.55427	5.25057	4.7394	4.8432
0.385562	5.44425	3.94085	4.55621	5.24951	4.74106	4.84275
0.385922	5.44394	3.94171	4.55837	5.24853	4.7424	4.84229
0.386282	5.44357	3.94264	4.56061	5.24769	4.74331	4.84181
0.386642	5.44318	3.94365	4.56278	5.24696	4.74375	4.84127
0.387002	5.44283	3.94469	4.56473	5.24631	4.74383	4.84065
0.387362	5.4426	3.94565	4.56632	5.24568	4.74368	4.83989
0.387722	5.44251	3.9464	4.56749	5.24502	4.74353	4.83895
0.388082	5.44252	3.94687	4.56815	5.24431	4.7436	4.83784
0.388442	5.44256	3.94708	4.56834	5.24356	4.74404	4.83663
0.388802	5.44249	3.94711	4.56817	5.24284	4.74483	4.83541
0.389162	5.4422	3.94706	4.56777	5.2423	4.74584	4.83426
0.389522	5.44169	3.94699	4.5673	5.24207	4.7468	4.83322
0.389882	5.44099	3.94696	4.56685	5.24226	4.74747	4.83236
0.390242	5.4402	3.94699	4.56654	5.24288	4.74765	4.83172
0.390602	5.43948	3.94701	4.56641	5.24387	4.74723	4.83132
0.390963	5.43898	3.94689	4.56648	5.2451	4.74621	4.83114
0.391323	5.43882	3.94649	4.5667	5.24641	4.74471	4.83114
0.391683	5.43912	3.94573	4.56695	5.24761	4.74298	4.83124
0.392043	5.43988	3.94462	4.56709	5.2485	4.7413	4.83141
0.392403	5.44105	3.94327	4.56701	5.24895	4.73993	4.83161
0.392763	5.44251	3.94185	4.56669	5.24893	4.73907	4.83178
0.393123	5.44415	3.94049	4.56616	5.2485	4.73873	4.83192
0.393483	5.44579	3.93935	4.56542	5.24778	4.73889	4.83199
0.393843	5.4473	3.93851	4.56451	5.24687	4.73945	4.83202
0.394203	5.44855	3.93803	4.56344	5.24591	4.74027	4.83201
0.394563	5.44949	3.93785	4.56233	5.24502	4.74123	4.83201
0.394923	5.45011	3.93786	4.56133	5.24435	4.74216	4.83202
0.395283	5.45043	3.93792	4.56055	5.24403	4.743	4.83211
0.395643	5.4505	3.93792	4.56003	5.24413	4.74374	4.83235
0.396003	5.45043	3.93789	4.55978	5.24467	4.74443	4.83273
0.396363	5.45033	3.9379	4.55981	5.24561	4.74515	4.83326
0.396723	5.45036	3.93798	4.56012	5.24694	4.74589	4.83388
0.397083	5.45053	3.93814	4.56068	5.24858	4.74664	4.83453
0.397443	5.45082	3.93835	4.56136	5.25039	4.74736	4.83513
0.397803	5.45111	3.93862	4.56202	5.25218	4.74802	4.83565
0.398163	5.4513	3.93897	4.56254	5.25367	4.74854	4.836
0.398523	5.45133	3.93938	4.56294	5.2546	4.74881	4.83614
0.398883	5.45113	3.93979	4.56324	5.25482	4.74875	4.83603
0.399243	5.45067	3.94008	4.56355	5.25426	4.74835	4.83577
0.399603	5.44994	3.94021	4.56392	5.25295	4.74765	4.83541
0.399963	5.44904	3.94022	4.56446	5.25097	4.74672	4.83506
0.400323	5.44814	3.94022	4.56526	5.2485	4.74566	4.83475
0.400683	5.44739	3.94025	4.56634	5.24583	4.74452	4.83453
0.401043	5.44689	3.94031	4.56761	5.24322	4.74342	4.83442
0.401403	5.44662	3.9404	4.56889	5.24092	4.7424	4.83444
0.401763	5.44655	3.94055	4.57	5.23911	4.74151	4.83451
0.402123	5.44657	3.94079	4.57077	5.23789	4.74074	4.83453
0.402483	5.44662	3.94115	4.57108	5.23727	4.74008	4.83441
0.402843	5.44668	3.94158	4.57087	5.23722	4.73956	4.83409
0.403203	5.4467	3.94205	4.5702	5.23759	4.73924	4.83359
0.403563	5.44666	3.94256	4.56921	5.23828	4.73915	4.83291
0.403923	5.44658	3.94313	4.56812	5.23912	4.73933	4.83209
0.404283	5.44648	3.94381	4.56713	5.24003	4.73973	4.83119
0.404643	5.44637	3.94456	4.56641	5.24088	4.74035	4.83035
0.405003	5.44624	3.94536	4.56604	5.24155	4.74115	4.8297
0.405363	5.44603	3.94614	4.56603	5.24197	4.74209	4.82935
0.405723	5.44563	3.94683	4.56634	5.24213	4.74304	4.82935
0.406083	5.44497	3.94732	4.5669	5.24212	4.74388	4.8297
0.406443	5.44403	3.9475	4.56758	5.242	4.74451	4.83038
0.406803	5.44285	3.94726	4.56828	5.24183	4.74493	4.83138
0.407163	5.44158	3.9466	4.56896	5.24165	4.74514	4.83264
0.407523	5.44042	3.94555	4.56961	5.24155	4.74517	4.83407
0.407883	5.43951	3.94422	4.57027	5.24164	4.74504	4.83555
0.408243	5.43896	3.94275	4.57096	5.24201	4.74476	4.83696
0.408603	5.43885	3.94129	4.57165	5.24262	4.74433	4.83813
0.408963	5.43916	3.94002	4.57228	5.24338	4.74377	4.83893
0.409323	5.43978	3.93909	4.5728	5.24415	4.74311	4.8393
0.409683	5.44052	3.93863	4.57313	5.24484	4.74236	4.83922
0.410043	5.44115	3.9387	4.57319	5.24538	4.74156	4.83879
0.410403	5.4415	3.93931	4.5729	5.24566	4.7407	4.83813
0.410763	5.4415	3.94036	4.5722	5.24562	4.73982	4.8374
0.411123	5.44122	3.94174	4.57115	5.24529	4.73894	4.83678
0.411483	5.44083	3.94333	4.56987	5.24473	4.73809	4.83645
0.411843	5.44056	3.945	4.56855	5.24407	4.73724	4.83652
0.412203	5.44063	3.9466	4.5673	5.24341	4.73636	4.83699
0.412563	5.44121	3.948	4.56624	5.24283	4.73543	4.83775
0.412923	5.44232	3.94909	4.56543	5.24237	4.7344	4.8386
0.413283	5.44388	3.94982	4.56492	5.24207	4.73336	4.83937
0.413643	5.44573	3.95018	4.56467	5.24197	4.73241	4.83991
0.414003	5.44759	3.95021	4.56462	5.24207	4.73166	4.84015
0.414363	5.44914	3.94998	4.56466	5.24237	4.7312	4.84007
0.414723	5.45012	3.94953	4.56475	5.24286	4.73109	4.83971
0.415083	5.45036	3.94894	4.56486	5.24349	4.73135	4.83912
0.415443	5.4499	3.94825	4.56503	5.24423	4.73194	4.83845
0.415803	5.44891	3.94752	4.56529	5.24504	4.73282	4.83781
0.416163	5.44761	3.94677	4.5657	5.24584	4.73382	4.8373
0.416523	5.44624	3.946	4.56631	5.24652	4.73478	4.83697
0.416883	5.44506	3.94519	4.56716	5.24698	4.73561	4.8368
0.417243	5.44426	3.94429	4.56829	5.24714	4.73627	4.83671
0.417603	5.44398	3.94326	4.56966	5.247	4.73677	4.83667
0.417963	5.44423	3.94212	4.57114	5.2466	4.73716	4.83663
0.418323	5.44487	3.94091	4.57263	5.24609	4.73748	4.83658
0.418683	5.44569	3.93976	4.57404	5.24558	4.73776	4.83651
0.419043	5.44649	3.93882	4.57533	5.24524	4.73804	4.83639
0.419403	5.4471	3.93828	4.5764	5.24519	4.73834	4.83621
0.419763	5.44738	3.93827	4.57719	5.24552	4.73858	4.83598
0.420123	5.44726	3.93887	4.57759	5.2462	4.73872	4.83573
0.420483	5.44672	3.94007	4.57759	5.24712	4.73869	4.83547
0.420843	5.44589	3.94175	4.5772	5.24808	4.73849	4.83515
0.421203	5.44494	3.94369	4.57648	5.24894	4.73811	4.83472
0.421563	5.44404	3.94557	4.57546	5.24955	4.73761	4.83418
0.421923	5.44333	3.9471	4.57419	5.24984	4.73702	4.83353
0.422283	5.44293	3.94806	4.5728	5.24976	4.73639	4.83281
0.422643	5.44287	3.94835	4.57146	5.24933	4.73578	4.83205
0.423003	5.44314	3.94797	4.57035	5.24859	4.73527	4.83125
0.423363	5.44367	3.94702	4.56961	5.24762	4.73496	4.83043
0.423723	5.44436	3.94568	4.56932	5.24652	4.73489	4.82966
0.424083	5.44508	3.94418	4.56949	5.24534	4.73511	4.829
0.424443	5.44571	3.94272	4.57011	5.24414	4.73564	4.82848
0.424803	5.4462	3.9414	4.57113	5.24297	4.73645	4.82808
0.425163	5.44654	3.94028	4.5725	5.24192	4.73745	4.82778
0.425523	5.44676	3.93932	4.5741	5.24104	4.73855	4.82756
0.425883	5.4469	3.93851	4.57583	5.24035	4.73959	4.8274
0.426243	5.44702	3.93776	4.57753	5.23985	4.74049	4.82729
0.426603	5.44719	3.93701	4.57904	5.23951	4.74116	4.82718
0.426963	5.44746	3.93618	4.58021	5.23928	4.74159	4.82705
0.427323	5.44788	3.9353	4.58092	5.23912	4.74178	4.82688
0.427683	5.44842	3.93447	4.58107	5.23898	4.74179	4.82672
0.428043	5.44903	3.93381	4.58059	5.23883	4.74174	4.82664
0.428403	5.44961	3.93351	4.57947	5.23869	4.7417	4.82668
0.428763	5.45008	3.93378	4.57778	5.23865	4.74174	4.82687
0.429123	5.4504	3.93475	4.57574	5.23878	4.74181	4.82722
0.429483	5.45054	3.93652	4.57361	5.23918	4.74185	4.82769
0.429843	5.45052	3.93904	4.57161	5.23984	4.74184	4.82827
0.430203	5.45035	3.94213	4.56992	5.24074	4.74175	4.82892
0.430563	5.45012	3.94549	4.56864	5.24181	4.74159	4.8296
0.430923	5.44992	3.94878	4.56779	5.24297	4.74135	4.83025
0.431283	5.44983	3.95164	4.56739	5.2441	4.74107	4.83093
0.431643	5.44988	3.9537	4.56737	5.24508	4.74077	4.83171
0.432003	5.45003	3.95471	4.56769	5.24583	4.74052	4.8327
0.432363	5.45025	3.95461	4.56831	5.24633	4.74032	4.83398
0.432723	5.45048	3.95352	4.56926	5.24657	4.74015	4.83554
0.433083	5.45067	3.95169	4.57063	5.24662	4.73999	4.83729
0.433443	5.45076	3.9494	4.57248	5.24654	4.7398	4.83909
0.433803	5.45073	3.94695	4.57479	5.24639	4.73962	4.84078
0.434163	5.45058	3.94463	4.57742	5.24626	4.73947	4.84214
0.434523	5.45039	3.94269	4.5802	5.24619	4.7394	4.84297
0.434883	5.4502	3.9413	4.58285	5.2462	4.73943	4.84315
0.435243	5.45005	3.94056	4.58513	5.24634	4.73958	4.8427
0.435603	5.44995	3.9404	4.58683	5.2466	4.73986	4.84179
0.435963	5.44987	3.94076	4.58775	5.24699	4.74021	4.84061
0.436323	5.4498	3.94153	4.58785	5.24746	4.74055	4.83934
0.436683	5.44975	3.94261	4.58718	5.2479	4.74079	4.83812
0.437043	5.44967	3.94387	4.58598	5.24825	4.74085	4.83705
0.437403	5.44957	3.94512	4.58454	5.24841	4.7407	4.83611
0.437763	5.44947	3.94621	4.58316	5.24835	4.74039	4.83518
0.438123	5.44942	3.94704	4.58206	5.24801	4.73998	4.8341
0.438483	5.44948	3.94759	4.5814	5.24737	4.73952	4.83274
0.438843	5.44965	3.94787	4.58127	5.24646	4.73906	4.83104
0.439203	5.44989	3.94792	4.5817	5.24537	4.73866	4.82904
0.439563	5.4501	3.94779	4.58261	5.2442	4.73835	4.82689
0.439923	5.45018	3.9476	4.58378	5.24306	4.73809	4.82479
0.440283	5.45008	3.9475	4.58492	5.24198	4.73788	4.82301
0.440643	5.44977	3.94765	4.58576	5.24105	4.73765	4.82175
0.441003	5.44926	3.94811	4.58609	5.24028	4.73737	4.82117
0.441363	5.44859	3.9489	4.58582	5.23971	4.73703	4.82126
0.441723	5.44785	3.94993	4.5849	5.23929	4.73666	4.82193
0.442083	5.44721	3.95111	4.58339	5.23892	4.73632	4.82299
0.442443	5.44684	3.95232	4.58145	5.23857	4.73603	4.82422
0.442803	5.44683	3.95343	4.57924	5.23826	4.7358	4.8254
0.443163	5.44717	3.9543	4.57705	5.23804	4.73562	4.82635
0.443523	5.44779	3.9548	4.57512	5.23793	4.73549	4.827
0.443883	5.44852	3.95487	4.57363	5.23793	4.73541	4.82736
0.444243	5.44924	3.95455	4.57267	5.23802	4.7354	4.82751
0.444603	5.4498	3.95396	4.57221	5.23825	4.73549	4.82755
0.444963	5.45007	3.95325	4.57214	5.23868	4.7357	4.82756
0.445323	5.44998	3.95257	4.5723	5.23928	4.73606	4.82762
0.445683	5.44955	3.95204	4.57258	5.23998	4.73658	4.82775
0.446043	5.44889	3.95174	4.57289	5.24063	4.73725	4.82795
0.446403	5.44816	3.9517	4.57323	5.24107	4.73803	4.82823
0.446763	5.4475	3.95188	4.57361	5.24128	4.73884	4.82857
0.447123	5.44693	3.9522	4.57403	5.24126	4.73962	4.82894
0.447483	5.44645	3.95254	4.5745	5.24104	4.74026	4.82929
0.447843	5.44602	3.95279	4.57503	5.24065	4.74072	4.82957
0.448203	5.44555	3.95286	4.57561	5.24016	4.74094	4.82975
0.448563	5.44497	3.95269	4.57621	5.2397	4.74092	4.82981
0.448923	5.4442	3.95229	4.57675	5.23944	4.74073	4.82972
0.449283	5.44317	3.9517	4.57714	5.23956	4.74048	4.8294
0.449643	5.44196	3.95105	4.57735	5.24009	4.74021	4.82883
0.450003	5.44071	3.95043	4.57742	5.24098	4.73999	4.82802
0.450363	5.4396	3.94993	4.57749	5.24208	4.73979	4.82705
0.450723	5.43878	3.94958	4.57768	5.24326	4.73957	4.82606
0.451083	5.4383	3.94938	4.57808	5.2444	4.73933	4.82517
0.451443	5.43811	3.94927	4.57874	5.24544	4.73902	4.82448
0.451803	5.43819	3.94919	4.57966	5.24631	4.73859	4.82407
0.452163	5.43848	3.94906	4.58086	5.24693	4.73809	4.82396
0.452523	5.43887	3.94886	4.58225	5.24728	4.73756	4.8242
0.452883	5.43919	3.94856	4.58371	5.24738	4.73706	4.82476
0.453243	5.43928	3.94824	4.58504	5.24727	4.73669	4.82551
0.453603	5.43912	3.94797	4.58606	5.24697	4.7365	4.82635
0.453963	5.43879	3.94788	4.58667	5.24653	4.73653	4.82715
0.454323	5.43844	3.94807	4.58684	5.24594	4.73672	4.82784
0.454683	5.43822	3.94861	4.58657	5.24526	4.73701	4.82843
0.455043	5.43824	3.94949	4.58592	5.24459	4.73729	4.82894
0.455403	5.43865	3.95063	4.58497	5.24402	4.73752	4.82938
0.455763	5.43953	3.95195	4.58387	5.24359	4.73763	4.82975
0.456123	5.44091	3.95333	4.5828	5.24332	4.73757	4.83009
0.456483	5.44274	3.95461	4.58192	5.24314	4.73733	4.83042
0.456843	5.44479	3.95569	4.58133	5.24299	4.73688	4.83078
0.457203	5.44683	3.95648	4.58108	5.24279	4.73627	4.83114
0.457563	5.44857	3.9569	4.58108	5.24253	4.73555	4.83139
0.457923	5.44979	3.95691	4.58123	5.24222	4.73478	4.83133
0.458283	5.45033	3.9565	4.5814	5.24197	4.73405	4.83083
0.458643	5.45014	3.95575	4.58143	5.24182	4.73346	4.82979
0.459003	5.44928	3.95467	4.58125	5.24184	4.73307	4.82819
0.459363	5.44792	3.95333	4.58079	5.24206	4.73291	4.82609
0.459723	5.44626	3.95176	4.58009	5.24243	4.73291	4.82363
0.460083	5.44452	3.95008	4.57926	5.24286	4.73297	4.82104
0.460443	5.44296	3.9484	4.57849	5.24322	4.73295	4.81864
0.460803	5.44177	3.94684	4.57796	5.24334	4.73273	4.81672
0.461163	5.44106	3.94548	4.5778	5.24316	4.7322	4.81557
0.461523	5.44086	3.94437	4.57808	5.24268	4.73133	4.81535
0.461883	5.44113	3.94355	4.57879	5.24204	4.73022	4.81606
0.462243	5.44176	3.94303	4.5799	5.24137	4.7291	4.81757
0.462603	5.44263	3.94283	4.58128	5.24085	4.72825	4.81962
0.462963	5.44358	3.94291	4.58282	5.2406	4.72793	4.82188
0.463323	5.44445	3.94319	4.5843	5.24068	4.72833	4.82407
0.463683	5.44506	3.94357	4.58557	5.24114	4.72949	4.82593
0.464043	5.44528	3.94397	4.58651	5.24192	4.73129	4.82726
0.464403	5.44503	3.94434	4.58702	5.24289	4.73339	4.82795
0.464763	5.44431	3.94467	4.58704	5.24396	4.73543	4.82804
0.465123	5.44322	3.94495	4.5866	5.24505	4.73702	4.82768
0.465483	5.4419	3.94521	4.58579	5.24613	4.73788	4.82715
0.465843	5.44055	3.94547	4.58482	5.24714	4.73791	4.82666
0.466203	5.43935	3.94574	4.5839	5.24803	4.73713	4.82637
0.466563	5.43844	3.94607	4.58324	5.24873	4.73575	4.82635
0.466923	5.43795	3.94647	4.58295	5.24913	4.73408	4.82661
0.467283	5.43793	3.94692	4.58314	5.24918	4.73245	4.82709
0.467643	5.43832	3.94737	4.58378	5.24883	4.73112	4.82768
0.468003	5.439	3.94778	4.58477	5.24805	4.73029	4.82825
0.468363	5.43984	3.9481	4.58593	5.24686	4.73	4.82864
0.468723	5.44074	3.94836	4.58699	5.24536	4.73022	4.82875
0.469083	5.44161	3.94856	4.58775	5.24367	4.73083	4.82854
0.469443	5.4424	3.94869	4.58801	5.24202	4.73169	4.82804
0.469803	5.44307	3.94874	4.58774	5.24063	4.73264	4.8273
0.470163	5.4436	3.94872	4.58698	5.23977	4.73354	4.82646
0.470523	5.44401	3.9486	4.58587	5.23962	4.73431	4.82563
0.470883	5.44429	3.94841	4.58457	5.24022	4.73492	4.82491
0.471243	5.44443	3.94815	4.58332	5.24153	4.73533	4.82436
0.471603	5.44435	3.94782	4.58227	5.24343	4.73558	4.82398
0.471963	5.44404	3.94745	4.58158	5.24577	4.73569	4.82376
0.472323	5.44345	3.94708	4.58129	5.24831	4.73574	4.8237
0.472683	5.4426	3.94677	4.58139	5.25079	4.73578	4.82374
0.473043	5.44148	3.9466	4.58178	5.25293	4.73588	4.82378
0.473403	5.44016	3.9466	4.58232	5.2545	4.73607	4.82373
0.473763	5.43873	3.94678	4.58286	5.25541	4.73634	4.82349
0.474123	5.43735	3.94714	4.58332	5.25568	4.73667	4.82308
0.474483	5.43618	3.94768	4.58363	5.25537	4.73699	4.82254
0.474843	5.43535	3.94839	4.58379	5.25457	4.73727	4.82194
0.475203	5.435	3.94927	4.58383	5.25342	4.73748	4.82134
0.475563	5.43515	3.9503	4.58379	5.25203	4.7376	4.82082
0.475923	5.43582	3.95144	4.58379	5.25064	4.73763	4.82048
0.476283	5.43693	3.95259	4.58396	5.24945	4.73754	4.82033
0.476643	5.43839	3.9537	4.5844	5.24862	4.7374	4.82037
0.477003	5.44003	3.95469	4.58511	5.24818	4.73719	4.8205
0.477363	5.4417	3.95548	4.58608	5.24808	4.73698	4.82061
0.477723	5.4432	3.95598	4.58727	5.24819	4.73673	4.82058
0.478083	5.44438	3.95614	4.58861	5.24843	4.73638	4.82036
0.478443	5.44515	3.95594	4.58997	5.2487	4.7359	4.81996
0.478803	5.44544	3.95545	4.59119	5.2489	4.73527	4.81945
0.479163	5.44531	3.95477	4.59212	5.24898	4.73458	4.81893
0.479523	5.44475	3.95406	4.59263	5.24887	4.73389	4.81851
0.479883	5.44382	3.95351	4.59267	5.24862	4.73329	4.81824
0.480243	5.44263	3.95324	4.59226	5.24836	4.73288	4.81815
0.480603	5.4413	3.95334	4.59145	5.24818	4.73275	4.81821
0.480963	5.44003	3.95379	4.59036	5.24819	4.73295	4.81833
0.481323	5.43892	3.95453	4.58912	5.2484	4.73349	4.8184
0.481683	5.43801	3.95543	4.58794	5.24883	4.73425	4.81833
0.482043	5.43731	3.95629	4.58696	5.24948	4.73509	4.81806
0.482403	5.43683	3.95693	4.58633	5.25033	4.73585	4.81762
0.482763	5.43659	3.95718	4.5861	5.25132	4.73641	4.8171
0.483123	5.43654	3.95698	4.58623	5.25236	4.73669	4.81665
0.483483	5.43663	3.95638	4.58661	5.25333	4.73666	4.81638
0.483843	5.43674	3.95555	4.58708	5.25414	4.73629	4.8164
0.484203	5.43682	3.95468	4.5875	5.25467	4.73564	4.81673
0.484563	5.43689	3.95396	4.58774	5.25481	4.73483	4.81735
0.484923	5.437	3.95352	4.58773	5.25447	4.734	4.81815
0.485283	5.43724	3.95342	4.58744	5.25364	4.73326	4.81898
0.485643	5.43762	3.9536	4.58692	5.25241	4.73264	4.8197
0.486003	5.43813	3.95398	4.58624	5.25094	4.73217	4.8202
0.486363	5.43873	3.95439	4.58556	5.24939	4.73185	4.82043
0.486723	5.43939	3.95468	4.58501	5.24794	4.73172	4.82037
0.487083	5.44003	3.95468	4.58469	5.24673	4.73182	4.82014
0.487443	5.44055	3.95434	4.58467	5.24584	4.73214	4.8199
0.487803	5.44082	3.95375	4.58493	5.24529	4.73265	4.81973
0.488163	5.44078	3.95305	4.58542	5.24499	4.73332	4.8197
0.488523	5.44046	3.95241	4.58606	5.24482	4.73412	4.81976
0.488883	5.43997	3.95199	4.58679	5.2447	4.73499	4.81986
0.489243	5.43948	3.95193	4.58752	5.24454	4.73585	4.81998
0.489603	5.43911	3.95229	4.58819	5.24432	4.73652	4.82004
0.489963	5.43899	3.9531	4.58876	5.24402	4.73689	4.82001
0.490323	5.43917	3.95426	4.58922	5.24362	4.73687	4.81983
0.490683	5.43967	3.95562	4.5896	5.24318	4.73647	4.8195
0.491043	5.44045	3.95699	4.58991	5.24278	4.73575	4.8191
0.491403	5.44142	3.95822	4.59019	5.24244	4.73482	4.81871
0.491763	5.44242	3.95919	4.59046	5.24216	4.73383	4.81838
0.492123	5.44333	3.95984	4.59074	5.24186	4.73294	4.81807
0.492483	5.44409	3.96014	4.59105	5.24154	4.73229	4.81769
0.492843	5.44474	3.96012	4.59143	5.24119	4.73195	4.81719
0.493203	5.4453	3.95987	4.5919	5.24085	4.73196	4.81662
0.493563	5.44584	3.95949	4.59248	5.24051	4.73224	4.81601
0.493923	5.44636	3.95911	4.59314	5.24014	4.7327	4.81549
0.494283	5.44688	3.9588	4.59382	5.23975	4.73324	4.81512
0.494643	5.44738	3.95862	4.59446	5.2394	4.73374	4.81502
0.495003	5.44786	3.95858	4.59502	5.23916	4.73408	4.81532
0.495363	5.44825	3.95868	4.59543	5.23904	4.73418	4.81606
0.495723	5.44847	3.95892	4.59561	5.23906	4.73402	4.81721
0.496083	5.4485	3.95926	4.59549	5.23925	4.73361	4.81857
0.496443	5.44835	3.95966	4.59509	5.23964	4.73301	4.81994
0.496803	5.44809	3.96009	4.59446	5.24021	4.73226	4.8211
0.497163	5.44776	3.9605	4.59368	5.2409	4.73141	4.82191
0.497523	5.4474	3.96085	4.59282	5.24163	4.73056	4.82228
0.497883	5.44701	3.96108	4.59188	5.24228	4.72981	4.82221
0.498243	5.4466	3.96112	4.59095	5.24278	4.72926	4.82172
0.498603	5.44623	3.96093	4.5901	5.24306	4.729	4.82092
0.498963	5.44591	3.96051	4.58943	5.24303	4.72908	4.81996
0.499323	5.44562	3.95995	4.589	5.24265	4.72954	4.81895
0.499683	5.44526	3.95934	4.58882	5.24192	4.73034	4.81796
0.500043	5.44477	3.95885	4.58893	5.24093	4.73141	4.81699
0.500403	5.44409	3.95864	4.58941	5.23979	4.73261	4.81602
0.500763	5.44326	3.95887	4.59028	5.2386	4.73375	4.81505
0.501123	5.44227	3.95961	4.59152	5.23741	4.73464	4.81412
0.501483	5.44116	3.96084	4.59303	5.23626	4.73515	4.81323
0.501843	5.43994	3.96246	4.59465	5.23519	4.73521	4.81243
0.502203	5.4387	3.96433	4.59626	5.23422	4.73485	4.81175
0.502563	5.43762	3.9663	4.59769	5.23338	4.73413	4.81121
0.502923	5.43684	3.96819	4.59877	5.23271	4.73316	4.81086
0.503283	5.4364	3.96978	4.59935	5.23221	4.73209	4.81071
0.503643	5.43628	3.9709	4.59935	5.2319	4.73104	4.81076
0.504003	5.43637	3.97148	4.59881	5.23183	4.73014	4.81097
0.504363	5.4366	3.97152	4.59782	5.23202	4.72949	4.8113
0.504723	5.43684	3.97109	4.5965	5.2325	4.72916	4.81173
0.505083	5.437	3.97022	4.59496	5.23318	4.72913	4.81228
0.505443	5.43698	3.96898	4.59339	5.23393	4.72938	4.81298
0.505803	5.43674	3.9675	4.59196	5.23462	4.72985	4.8138
0.506163	5.4363	3.96596	4.59084	5.23515	4.73047	4.81474
0.506523	5.43571	3.96457	4.59012	5.23548	4.73121	4.81574
0.506883	5.43504	3.96347	4.58981	5.23564	4.73195	4.81673
0.507243	5.43434	3.96274	4.58993	5.2357	4.73257	4.81768
0.507603	5.43364	3.9624	4.59049	5.23575	4.73295	4.81856
0.507963	5.43291	3.96247	4.59145	5.23593	4.73303	4.81934
0.508323	5.43219	3.96292	4.59274	5.23633	4.73282	4.82001
0.508683	5.43156	3.96364	4.59417	5.237	4.73238	4.82057
0.509043	5.43107	3.96445	4.59558	5.23788	4.73183	4.82101
0.509403	5.4308	3.96518	4.59682	5.23888	4.73133	4.82137
0.509763	5.4308	3.9657	4.59781	5.23988	4.73097	4.82165
0.510123	5.43109	3.96594	4.59849	5.24072	4.73089	4.82187
0.510483	5.43165	3.9659	4.59881	5.24126	4.73117	4.822
0.510843	5.43247	3.96562	4.59874	5.24139	4.73182	4.82204
0.511203	5.43348	3.96514	4.59833	5.24113	4.73279	4.82197
0.511563	5.43461	3.96456	4.59765	5.24051	4.73396	4.82185
0.511923	5.43582	3.96398	4.59679	5.23963	4.7352	4.82171
0.512283	5.43715	3.96353	4.59579	5.2386	4.73636	4.82158
0.512643	5.4386	3.9633	4.59472	5.23748	4.73737	4.82148
0.513003	5.44018	3.96336	4.59364	5.23637	4.73813	4.82138
0.513363	5.44182	3.96369	4.59264	5.23537	4.73866	4.82131
0.513723	5.44346	3.9642	4.59178	5.2346	4.73895	4.82124
0.514083	5.44497	3.96482	4.59113	5.2341	4.73899	4.82123
0.514443	5.44623	3.96547	4.59071	5.23389	4.73879	4.82132
0.514803	5.4471	3.9661	4.59052	5.23393	4.73839	4.82153
0.515163	5.44751	3.96665	4.59047	5.23419	4.73784	4.8219
0.515523	5.44748	3.96713	4.59047	5.23468	4.73722	4.82244
0.515883	5.44708	3.96752	4.59039	5.23536	4.73663	4.82312
0.516243	5.44642	3.96791	4.59011	5.23613	4.73614	4.82392
0.516603	5.44558	3.96839	4.58962	5.23686	4.73576	4.82479
0.516963	5.44469	3.96906	4.58893	5.23743	4.73552	4.82556
0.517323	5.44385	3.96994	4.58816	5.23776	4.73543	4.82612
0.517683	5.44311	3.97099	4.58743	5.23782	4.73548	4.82634
0.518043	5.44244	3.97214	4.58689	5.23763	4.73559	4.82618
0.518403	5.44174	3.97333	4.58666	5.2372	4.73567	4.82568
0.518763	5.44093	3.9745	4.58683	5.2366	4.73561	4.82488
0.519123	5.44001	3.97555	4.58741	5.23594	4.7354	4.82388
0.519483	5.439	3.97639	4.58837	5.23542	4.73509	4.82279
0.519843	5.43792	3.97689	4.58959	5.23523	4.73475	4.82182
0.520203	5.43676	3.97707	4.591	5.23552	4.73445	4.82109
0.520563	5.43554	3.97692	4.59251	5.23636	4.7343	4.82069
0.520923	5.43435	3.97649	4.59407	5.23769	4.73436	4.82059
0.521283	5.43333	3.97577	4.59567	5.23942	4.73469	4.8207
0.521643	5.43262	3.97476	4.59728	5.24138	4.73529	4.82089
0.522003	5.43229	3.97345	4.59881	5.24334	4.73603	4.82102
0.522363	5.43237	3.9719	4.60021	5.24507	4.73678	4.82095
0.522723	5.43288	3.97016	4.60143	5.24629	4.73741	4.82057
0.523083	5.43379	3.9683	4.60238	5.24684	4.73782	4.8199
0.523443	5.43505	3.96643	4.60301	5.24665	4.73797	4.81901
0.523803	5.43652	3.96469	4.60322	5.2458	4.73788	4.81806
0.524163	5.43802	3.96329	4.60301	5.24445	4.73758	4.81721
0.524523	5.43945	3.96237	4.60238	5.24279	4.7372	4.81659
0.524883	5.44071	3.96203	4.60141	5.24102	4.73686	4.81634
0.525243	5.44181	3.96233	4.60014	5.23931	4.73668	4.8165
0.525603	5.4428	3.96327	4.59863	5.23782	4.73673	4.81706
0.525963	5.44377	3.96478	4.59697	5.23663	4.73701	4.81791
0.526323	5.44477	3.96669	4.59532	5.23573	4.73746	4.81891
0.526683	5.44583	3.96878	4.59383	5.23508	4.738	4.81992
0.527043	5.44695	3.9708	4.59265	5.2346	4.7385	4.82085
0.527403	5.44805	3.97261	4.59187	5.23424	4.73886	4.82161
0.527763	5.44905	3.9741	4.59155	5.23394	4.73894	4.82211
0.528123	5.4498	3.97518	4.59173	5.23367	4.73871	4.8223
0.528483	5.4502	3.97581	4.59242	5.2334	4.73818	4.82218
0.528843	5.45016	3.97596	4.5935	5.2331	4.73748	4.82178
0.529203	5.44969	3.97571	4.59481	5.23278	4.73675	4.82116
0.529563	5.44885	3.97518	4.59616	5.23247	4.73611	4.82041
0.529923	5.4478	3.97447	4.5974	5.23221	4.73571	4.8196
0.530283	5.4467	3.9736	4.59842	5.23204	4.73564	4.81879
0.530643	5.4457	3.97262	4.59917	5.23202	4.73593	4.81809
0.531003	5.44488	3.97158	4.5996	5.23224	4.73658	4.81755
0.531363	5.44429	3.97055	4.59975	5.23281	4.73745	4.81716
0.531723	5.44389	3.96957	4.59967	5.23375	4.73835	4.8169
0.532083	5.44362	3.96873	4.59942	5.23506	4.73912	4.81669
0.532443	5.44338	3.96807	4.59909	5.23663	4.73959	4.81647
0.532803	5.44305	3.96764	4.59873	5.23832	4.73971	4.81625
0.533163	5.44259	3.96748	4.59841	5.24001	4.73944	4.81604
0.533523	5.44201	3.96761	4.59819	5.2415	4.73879	4.8159
0.533883	5.44137	3.96804	4.59811	5.24267	4.73786	4.81587
0.534243	5.44071	3.9687	4.5982	5.24341	4.73681	4.81598
0.534603	5.44006	3.96951	4.59847	5.24374	4.73582	4.81628
0.534963	5.43945	3.97031	4.59896	5.24374	4.73503	4.81678
0.535323	5.43885	3.97098	4.5996	5.24358	4.73449	4.81747
0.535683	5.43825	3.97142	4.60035	5.24336	4.73422	4.81827
0.536043	5.43762	3.97161	4.60102	5.24317	4.7342	4.81904
0.536403	5.43696	3.97162	4.60153	5.24305	4.73432	4.81965
0.536763	5.43631	3.97156	4.60176	5.24296	4.73447	4.82007
0.537123	5.43575	3.97156	4.60174	5.24288	4.73453	4.82028
0.537483	5.43532	3.9717	4.60148	5.24272	4.73437	4.82028
0.537843	5.43506	3.97204	4.60107	5.24239	4.73394	4.82007
0.538203	5.43493	3.97258	4.60058	5.24186	4.73324	4.81965
0.538563	5.43491	3.97326	4.60011	5.24114	4.73229	4.81911
0.538923	5.43494	3.97399	4.59978	5.2403	4.73116	4.81859
0.539283	5.43486	3.9746	4.59967	5.23949	4.7299	4.81818
0.539643	5.43455	3.97496	4.5998	5.23881	4.72859	4.81791
0.540003	5.43397	3.97499	4.60016	5.23836	4.72736	4.81781
0.540363	5.43312	3.97477	4.60072	5.23815	4.72631	4.81781
0.540723	5.43213	3.97444	4.60142	5.23817	4.72549	4.81785
0.541083	5.4311	3.97417	4.60228	5.23835	4.72496	4.81788
0.541443	5.43017	3.97409	4.60326	5.23865	4.72474	4.81781
0.541803	5.42949	3.97434	4.60433	5.23896	4.72488	4.81762
0.542163	5.42914	3.97497	4.60546	5.23921	4.72541	4.81722
0.542523	5.42917	3.97599	4.60657	5.23936	4.72631	4.81662
0.542883	5.42952	3.97729	4.60759	5.23942	4.72755	4.81582
0.543243	5.43008	3.97862	4.6084	5.23946	4.72901	4.81489
0.543603	5.43069	3.97972	4.6089	5.2395	4.73061	4.81391
0.543963	5.43125	3.9804	4.60898	5.23961	4.73226	4.813
0.544323	5.43163	3.98059	4.60861	5.23975	4.73382	4.81218
0.544683	5.43178	3.9803	4.60777	5.23992	4.7352	4.8115
0.545043	5.43165	3.97958	4.60653	5.24008	4.73629	4.81093
0.545403	5.4313	3.97854	4.60499	5.2402	4.73704	4.81048
0.545763	5.43081	3.97736	4.60333	5.24024	4.73747	4.81011
0.546123	5.43029	3.97624	4.60173	5.24023	4.73762	4.80983
0.546483	5.42988	3.97536	4.60036	5.24023	4.73757	4.80958
0.546843	5.42966	3.97478	4.59931	5.24027	4.7374	4.80932
0.547204	5.42969	3.97449	4.59864	5.24035	4.73717	4.80902
0.547564	5.43003	3.97436	4.59834	5.24046	4.73695	4.80866
0.547924	5.43069	3.97432	4.59838	5.24052	4.73676	4.80833
0.548284	5.43165	3.97433	4.5987	5.24047	4.7366	4.80806
0.548644	5.43289	3.9744	4.5992	5.24024	4.73644	4.80788
0.549004	5.4343	3.9745	4.59979	5.23974	4.73622	4.80778
0.549364	5.43584	3.97467	4.60042	5.23897	4.73588	4.80772
0.549724	5.43741	3.97491	4.60108	5.23799	4.73537	4.80769
0.550084	5.43892	3.9753	4.60181	5.23697	4.73474	4.80771
0.550444	5.44029	3.97583	4.6026	5.23608	4.73403	4.80778
0.550804	5.44138	3.97648	4.60343	5.23553	4.73328	4.80788
0.551164	5.44207	3.97713	4.60427	5.23537	4.73255	4.80796
0.551524	5.44227	3.97764	4.60499	5.23566	4.73192	4.80808
0.551884	5.44192	3.97789	4.6055	5.23638	4.73148	4.80832
0.552244	5.44106	3.97781	4.6057	5.23747	4.73135	4.80876
0.552604	5.43976	3.97737	4.60547	5.23882	4.73161	4.80945
0.552964	5.43815	3.9766	4.60481	5.24027	4.73228	4.81034
0.553324	5.43643	3.97559	4.60378	5.24168	4.73332	4.81138
0.553684	5.43478	3.97445	4.60259	5.24299	4.73468	4.81247
0.554044	5.4334	3.97335	4.60145	5.24417	4.73627	4.81352
0.554404	5.43243	3.97242	4.6006	5.24523	4.738	4.8144
0.554764	5.43196	3.97173	4.60017	5.24615	4.73972	4.815
0.555124	5.43196	3.97127	4.60025	5.2469	4.74128	4.81526
0.555484	5.43236	3.97105	4.60084	5.24743	4.74249	4.81523
0.555844	5.43298	3.97107	4.60184	5.24777	4.74328	4.81499
0.556204	5.43368	3.9713	4.6031	5.24789	4.74362	4.81471
0.556564	5.43432	3.97171	4.60437	5.24779	4.74352	4.81452
0.556924	5.43483	3.97226	4.60547	5.24744	4.74306	4.81452
0.557284	5.43519	3.97293	4.60631	5.24685	4.74233	4.81478
0.557644	5.43545	3.9737	4.60686	5.24605	4.74141	4.81529
0.558004	5.4357	3.97456	4.60714	5.2451	4.74042	4.81598
0.558364	5.43606	3.97546	4.60716	5.24409	4.73943	4.81665
0.558724	5.43665	3.97632	4.60699	5.24316	4.73846	4.81711
0.559084	5.4375	3.97702	4.60669	5.24245	4.7375	4.81716
0.559444	5.43857	3.97753	4.60635	5.24204	4.73648	4.81672
0.559804	5.43977	3.97778	4.60601	5.242	4.7353	4.81582
0.560164	5.44099	3.97778	4.60567	5.24229	4.73391	4.81457
0.560524	5.44211	3.97756	4.60539	5.24285	4.73228	4.81315
0.560884	5.44303	3.97716	4.60523	5.24356	4.73049	4.8118
0.561244	5.44366	3.97667	4.60529	5.24423	4.72866	4.81074
0.561604	5.44393	3.97616	4.60564	5.24465	4.72695	4.81014
0.561964	5.44384	3.9757	4.6063	5.24467	4.72552	4.81005
0.562324	5.44341	3.97533	4.60725	5.24425	4.72447	4.81039
0.562684	5.44261	3.97507	4.60843	5.24353	4.72391	4.81102
0.563044	5.44143	3.97495	4.60981	5.24272	4.72385	4.81179
0.563404	5.43987	3.97492	4.61127	5.24202	4.72425	4.81254
0.563764	5.43798	3.97493	4.61269	5.24157	4.72496	4.81319
0.564124	5.43593	3.97493	4.6139	5.24145	4.72587	4.81369
0.564484	5.43393	3.97485	4.61478	5.2417	4.72685	4.81406
0.564844	5.43218	3.97474	4.61528	5.24226	4.72779	4.81439
0.565204	5.43084	3.97457	4.61537	5.24299	4.72863	4.81478
0.565564	5.43007	3.97437	4.61502	5.24367	4.72931	4.81529
0.565924	5.42994	3.97419	4.61423	5.24412	4.7298	4.8159
0.566284	5.43036	3.9741	4.61307	5.24422	4.73008	4.81659
0.566644	5.43117	3.97419	4.61166	5.24394	4.73012	4.8173
0.567004	5.43205	3.9745	4.61028	5.2433	4.72994	4.81802
0.567364	5.43273	3.97504	4.60911	5.2424	4.72958	4.81876
0.567724	5.43302	3.97578	4.60832	5.24134	4.72909	4.81949
0.568084	5.43289	3.97668	4.60793	5.24026	4.72857	4.82017
0.568444	5.43241	3.97765	4.60792	5.23927	4.72815	4.82081
0.568804	5.43172	3.97856	4.60821	5.23843	4.72793	4.82141
0.569164	5.43106	3.9793	4.60866	5.23786	4.72802	4.82197
0.569524	5.43058	3.97981	4.6091	5.23762	4.72842	4.82239
0.569884	5.43044	3.98007	4.60935	5.23772	4.72906	4.82253
0.570244	5.43064	3.9801	4.60938	5.23816	4.72981	4.8223
0.570604	5.43109	3.97993	4.6092	5.23885	4.73053	4.82169
0.570964	5.4316	3.97959	4.60899	5.2397	4.73108	4.82078
0.571324	5.43203	3.97913	4.60894	5.24061	4.73137	4.81965
0.571684	5.43225	3.97859	4.60921	5.24151	4.73135	4.81839
0.572044	5.43228	3.97801	4.60988	5.24236	4.73099	4.81709
0.572404	5.43218	3.97745	4.6109	5.2431	4.73035	4.81586
0.572764	5.43212	3.97693	4.61213	5.24373	4.72955	4.8148
0.573124	5.43227	3.97649	4.61338	5.24428	4.72873	4.81396
0.573484	5.43277	3.97618	4.61444	5.24483	4.72803	4.81333
0.573844	5.43372	3.97605	4.61518	5.24541	4.72748	4.81291
0.574204	5.43509	3.97611	4.61552	5.24601	4.72715	4.81271
0.574564	5.43678	3.97635	4.6155	5.24656	4.72704	4.81274
0.574924	5.43863	3.97674	4.61525	5.247	4.72715	4.81297
0.575284	5.44043	3.97722	4.61497	5.24724	4.72749	4.81339
0.575644	5.44196	3.9777	4.61484	5.24726	4.72803	4.81395
0.576004	5.44302	3.9781	4.61492	5.24706	4.72869	4.81454
0.576364	5.44352	3.97836	4.61516	5.24667	4.72942	4.81507
0.576724	5.44338	3.97852	4.61544	5.24609	4.73015	4.81541
0.577084	5.44264	3.97869	4.61563	5.24541	4.73086	4.81547
0.577444	5.44133	3.97899	4.61558	5.24467	4.73146	4.81519
0.577804	5.43957	3.97953	4.61514	5.24397	4.73189	4.81459
0.578164	5.43749	3.98036	4.61423	5.24331	4.73205	4.81377
0.578524	5.43525	3.98152	4.61289	5.24267	4.73195	4.81285
0.578884	5.43309	3.98293	4.61127	5.24203	4.73158	4.81195
0.579244	5.43123	3.98448	4.6096	5.24141	4.73104	4.81116
0.579604	5.42986	3.98592	4.60809	5.24089	4.73041	4.81053
0.579964	5.42911	3.98697	4.60692	5.24056	4.72981	4.81006
0.580324	5.42902	3.98743	4.60624	5.24044	4.7293	4.80971
0.580684	5.4296	3.98716	4.60611	5.24055	4.72894	4.80939
0.581044	5.43076	3.98621	4.60656	5.24091	4.72878	4.809
0.581404	5.43236	3.98465	4.60751	5.24144	4.72876	4.80847
0.581764	5.43419	3.98266	4.60877	5.24208	4.72887	4.80777
0.582124	5.43599	3.98046	4.61015	5.24269	4.72901	4.80695
0.582484	5.43754	3.97832	4.61144	5.24309	4.72914	4.80615
0.582844	5.43869	3.97648	4.61248	5.24321	4.72924	4.80552
0.583204	5.43937	3.97508	4.61317	5.24303	4.7294	4.80523
0.583564	5.43961	3.97421	4.61347	5.24262	4.72966	4.80536
0.583924	5.43949	3.97387	4.61344	5.24207	4.73013	4.806
0.584284	5.43912	3.97398	4.61321	5.24152	4.73083	4.80708
0.584644	5.43868	3.97444	4.61295	5.24107	4.73173	4.80849
0.585004	5.43832	3.97508	4.61279	5.24076	4.73275	4.81007
0.585364	5.43818	3.97575	4.61284	5.24059	4.73378	4.81157
0.585724	5.43834	3.97639	4.61316	5.24052	4.73467	4.8128
0.586084	5.43881	3.97694	4.61374	5.2405	4.73529	4.81361
0.586444	5.43952	3.97739	4.61452	5.24043	4.73554	4.81398
0.586804	5.44038	3.97774	4.61542	5.24028	4.73538	4.81398
0.587164	5.44122	3.97802	4.61634	5.24001	4.73493	4.81381
0.587524	5.44188	3.97832	4.6172	5.23967	4.73436	4.81367
0.587884	5.44223	3.97871	4.61795	5.23929	4.73384	4.81363
0.588244	5.44218	3.9792	4.61856	5.23896	4.73348	4.8137
0.588604	5.4417	3.97972	4.61901	5.23872	4.73333	4.81384
0.588964	5.44081	3.98018	4.61931	5.2386	4.73335	4.81396
0.589324	5.43963	3.98051	4.61949	5.23864	4.73354	4.81392
0.589684	5.43831	3.98067	4.61955	5.23881	4.73379	4.81353
0.590044	5.437	3.98065	4.61951	5.23909	4.73401	4.81263
0.590404	5.43587	3.98046	4.61936	5.23943	4.73409	4.8112
0.590764	5.43507	3.9801	4.6191	5.23983	4.73402	4.80936
0.591124	5.43466	3.97962	4.61869	5.24026	4.73389	4.80735
0.591484	5.43467	3.97905	4.6181	5.24069	4.73384	4.80543
0.591844	5.43509	3.97848	4.61727	5.24105	4.73393	4.80384
0.592204	5.43585	3.97796	4.61619	5.24129	4.73419	4.80275
0.592564	5.43694	3.9775	4.61485	5.24142	4.73461	4.80228
0.592924	5.43837	3.97705	4.61332	5.24147	4.73514	4.80253
0.593284	5.44011	3.97659	4.61172	5.24149	4.73568	4.80347
0.593644	5.44209	3.97615	4.61021	5.24148	4.73608	4.805
0.594004	5.44421	3.97583	4.60897	5.24145	4.73621	4.80691
0.594364	5.44633	3.97571	4.60818	5.24142	4.73601	4.80891
0.594724	5.44835	3.97586	4.60793	5.24141	4.73548	4.81076
0.595084	5.45012	3.97624	4.60826	5.24144	4.73473	4.81228
0.595444	5.45153	3.97682	4.60911	5.24145	4.73389	4.81336
0.595804	5.45249	3.97754	4.61029	5.24136	4.73307	4.81395
0.596164	5.45295	3.97836	4.61162	5.24112	4.73241	4.81401
0.596524	5.45293	3.97915	4.61289	5.24069	4.73201	4.81358
0.596884	5.45253	3.97978	4.61394	5.24011	4.73195	4.81273
0.597244	5.45188	3.98018	4.6147	5.2394	4.73222	4.8116
0.597604	5.4511	3.9803	4.61517	5.23862	4.73274	4.8104
0.597964	5.45029	3.98023	4.61538	5.2378	4.73346	4.80927
0.598324	5.44953	3.98001	4.61547	5.23698	4.73431	4.80829
0.598684	5.44884	3.9797	4.61553	5.23624	4.73527	4.80751
0.599044	5.44822	3.97933	4.61569	5.23565	4.73633	4.80695
0.599404	5.44768	3.9789	4.61597	5.23528	4.73747	4.80664
0.599764	5.44725	3.97846	4.61635	5.23521	4.73862	4.80664
0.600124	5.44692	3.97801	4.61681	5.23546	4.73976	4.80688
0.600484	5.44668	3.97757	4.6173	5.23602	4.74086	4.80723
0.600844	5.44649	3.97717	4.61779	5.23688	4.7419	4.80754
0.601204	5.44634	3.9769	4.61826	5.23804	4.74279	4.80771
0.601564	5.44622	3.97688	4.61866	5.23944	4.74346	4.80767
0.601924	5.44609	3.97715	4.61903	5.24096	4.74387	4.8074
0.602284	5.44592	3.97772	4.61937	5.24246	4.74402	4.8069
0.602644	5.44567	3.9785	4.61978	5.24374	4.74398	4.80621
0.603004	5.44531	3.97933	4.62025	5.24474	4.74383	4.80546
0.603364	5.44485	3.98009	4.62078	5.24536	4.74364	4.8048
0.603724	5.44427	3.98063	4.6213	5.2455	4.7435	4.80435
0.604084	5.44355	3.98077	4.62179	5.24513	4.74344	4.80416
0.604444	5.44264	3.9804	4.6222	5.24428	4.7435	4.80426
0.604804	5.44158	3.97952	4.6225	5.24308	4.74366	4.80462
0.605164	5.44042	3.97829	4.62262	5.24173	4.74387	4.80522
0.605524	5.43929	3.97692	4.62252	5.2404	4.74405	4.80596
0.605884	5.43832	3.97567	4.62218	5.23928	4.74417	4.80675
0.606244	5.43758	3.97471	4.62163	5.23845	4.74415	4.80749
0.606604	5.4371	3.97415	4.62095	5.23801	4.74395	4.80819
0.606964	5.4369	3.97413	4.62021	5.23801	4.74355	4.80884
0.607324	5.43694	3.97472	4.61946	5.23842	4.74292	4.80939
0.607684	5.43718	3.97586	4.61878	5.23916	4.7421	4.80977
0.608044	5.43748	3.97744	4.6182	5.24011	4.7411	4.80995
0.608404	5.43773	3.97927	4.6178	5.24113	4.73995	4.80989
0.608764	5.43789	3.98117	4.6176	5.24214	4.73864	4.80963
0.609124	5.43799	3.98299	4.61753	5.24308	4.73723	4.80919
0.609484	5.43815	3.98458	4.61751	5.24394	4.73578	4.80862
0.609844	5.43845	3.98579	4.61742	5.2447	4.73442	4.80801
0.610204	5.4389	3.98652	4.61718	5.24533	4.73326	4.8075
0.610564	5.43942	3.98676	4.61678	5.2458	4.73242	4.80717
0.610924	5.43991	3.9866	4.61622	5.24612	4.73195	4.80711
0.611284	5.44019	3.98613	4.61553	5.2463	4.73189	4.8073
0.611644	5.44015	3.98548	4.61476	5.2464	4.73224	4.80775
0.612004	5.43963	3.98472	4.61401	5.24643	4.73289	4.80846
0.612364	5.4386	3.98397	4.61341	5.24637	4.73372	4.80937
0.612724	5.43713	3.98329	4.61313	5.24619	4.73456	4.81038
0.613084	5.43541	3.98269	4.61329	5.24586	4.73527	4.81134
0.613444	5.43367	3.98217	4.61397	5.24537	4.73576	4.81214
0.613804	5.43216	3.9817	4.61516	5.24468	4.73599	4.81266
0.614164	5.43103	3.98124	4.6168	5.24381	4.73603	4.81286
0.614524	5.43035	3.9808	4.61878	5.24277	4.73597	4.81267
0.614884	5.4302	3.98039	4.62094	5.24159	4.73596	4.81204
0.615244	5.43056	3.98	4.62307	5.2404	4.73614	4.81102
0.615604	5.43137	3.97971	4.62493	5.23934	4.73661	4.80974
0.615964	5.43251	3.9795	4.62633	5.23861	4.73746	4.80834
0.616324	5.4339	3.97937	4.6271	5.23834	4.73869	4.80706
0.616684	5.43543	3.97928	4.62723	5.23857	4.74019	4.80609
0.617044	5.43703	3.97918	4.62676	5.23923	4.74179	4.80556
0.617404	5.43858	3.979	4.62582	5.24018	4.74325	4.80556
0.617764	5.43996	3.97875	4.62456	5.24127	4.74433	4.80604
0.618124	5.44101	3.9784	4.62319	5.24238	4.74485	4.80691
0.618484	5.44162	3.97795	4.62188	5.24337	4.74467	4.80804
0.618844	5.44182	3.97746	4.62077	5.24409	4.74374	4.80925
0.619204	5.44167	3.97697	4.61995	5.24448	4.74212	4.8104
0.619564	5.44127	3.9766	4.61945	5.24451	4.73998	4.81135
0.619924	5.44074	3.97642	4.61928	5.24423	4.73762	4.81203
0.620284	5.44016	3.9765	4.61945	5.24372	4.73536	4.81245
0.620644	5.4396	3.97686	4.61997	5.24307	4.73351	4.81266
0.621004	5.43918	3.97748	4.62085	5.24232	4.7323	4.81273
0.621364	5.43894	3.97829	4.62202	5.24152	4.73184	4.81274
0.621724	5.43886	3.97919	4.62341	5.24072	4.73214	4.81274
0.622084	5.43893	3.98008	4.62487	5.24	4.73318	4.81278
0.622444	5.43911	3.9808	4.62624	5.23946	4.73478	4.81286
0.622804	5.43941	3.98126	4.62732	5.2392	4.73673	4.81302
0.623164	5.43986	3.98144	4.62791	5.23922	4.73878	4.81325
0.623524	5.44049	3.98138	4.62788	5.23947	4.74072	4.81352
0.623884	5.4413	3.98113	4.62722	5.23986	4.74234	4.81378
0.624244	5.44223	3.98082	4.62602	5.24029	4.74359	4.81399
0.624604	5.44317	3.98055	4.62444	5.24064	4.74441	4.81412
0.624964	5.44401	3.9804	4.62275	5.24082	4.74479	4.81414
0.625324	5.44468	3.98038	4.62118	5.24073	4.74474	4.814
0.625684	5.44508	3.98045	4.61999	5.24037	4.74428	4.81369
0.626044	5.44515	3.98053	4.6193	5.23986	4.74352	4.81318
0.626404	5.4449	3.98051	4.61912	5.23939	4.7426	4.81251
0.626764	5.44437	3.98033	4.61939	5.23915	4.74165	4.81172
0.627124	5.44367	3.97999	4.62	5.23928	4.74077	4.81088
0.627484	5.44292	3.97954	4.62083	5.23986	4.74002	4.81007
0.627844	5.44221	3.97909	4.62175	5.24082	4.73942	4.8094
0.628204	5.44159	3.97878	4.62261	5.24202	4.739	4.80899
0.628564	5.44109	3.97878	4.62335	5.24324	4.73875	4.80893
0.628924	5.44072	3.97919	4.62402	5.24423	4.73866	4.80923
0.629284	5.44043	3.98005	4.62472	5.24476	4.73867	4.80984
0.629644	5.44021	3.98126	4.62559	5.24472	4.73874	4.81067
0.630004	5.44002	3.98269	4.62666	5.24412	4.73885	4.81159
0.630364	5.43988	3.98414	4.62788	5.24309	4.739	4.81246
0.630724	5.43977	3.98542	4.62908	5.24185	4.7392	4.81316
0.631084	5.4397	3.98638	4.63009	5.24066	4.73946	4.81356
0.631444	5.43965	3.98694	4.63074	5.23976	4.73979	4.81361
0.631804	5.43962	3.98706	4.63093	5.23931	4.74015	4.81332
0.632164	5.43955	3.98679	4.63058	5.23934	4.74052	4.81276
0.632524	5.4394	3.98619	4.62967	5.23978	4.74091	4.81201
0.632884	5.43911	3.98538	4.62834	5.24045	4.7413	4.81119
0.633244	5.4387	3.98443	4.62677	5.24117	4.74172	4.8104
0.633604	5.4382	3.98341	4.62531	5.24177	4.74218	4.80974
0.633964	5.43764	3.98237	4.62425	5.24214	4.74266	4.8093
0.634324	5.43704	3.98132	4.62376	5.24223	4.74318	4.80911
0.634684	5.43643	3.98034	4.62387	5.24208	4.74375	4.80916
0.635044	5.43586	3.97951	4.62447	5.24176	4.74442	4.80944
0.635404	5.43533	3.97888	4.62545	5.24136	4.74516	4.80987
0.635764	5.43485	3.97851	4.6267	5.24099	4.74589	4.81036
0.636124	5.43438	3.97846	4.62812	5.24073	4.74657	4.81078
0.636484	5.43392	3.97878	4.62959	5.24063	4.74717	4.81098
0.636844	5.43354	3.9795	4.63098	5.24067	4.74767	4.81089
0.637204	5.4333	3.98061	4.6322	5.24084	4.74802	4.81048
0.637564	5.43329	3.98199	4.63331	5.24108	4.74818	4.80978
0.637924	5.43352	3.98349	4.63432	5.24137	4.74808	4.80887
0.638284	5.43401	3.98495	4.63524	5.24169	4.74776	4.80787
0.638644	5.43474	3.98624	4.63602	5.24201	4.74727	4.80686
0.639004	5.43565	3.98723	4.63654	5.24229	4.74668	4.80591
0.639364	5.43659	3.98781	4.63677	5.2425	4.74603	4.80508
0.639724	5.43737	3.98799	4.6367	5.24265	4.74535	4.80438
0.640084	5.4379	3.9878	4.63638	5.24281	4.74473	4.80382
0.640444	5.43812	3.98741	4.63582	5.24305	4.74427	4.80332
0.640804	5.4381	3.987	4.63508	5.24337	4.74404	4.80287
0.641164	5.43789	3.98676	4.63428	5.24377	4.74407	4.80245
0.641524	5.43762	3.98689	4.63353	5.2442	4.74432	4.80214
0.641884	5.43738	3.98748	4.63296	5.24465	4.74474	4.80204
0.642244	5.4373	3.98856	4.63264	5.24511	4.74526	4.80224
0.642604	5.43746	3.99004	4.63257	5.2455	4.74577	4.80274
0.642964	5.4378	3.99173	4.63273	5.24576	4.7462	4.80351
0.643324	5.43821	3.99343	4.63299	5.24587	4.74647	4.80445
0.643684	5.43856	3.99491	4.63321	5.24588	4.74653	4.80545
0.644044	5.43876	3.99593	4.63322	5.24586	4.74639	4.80638
0.644404	5.43879	3.99632	4.6329	5.24586	4.74612	4.80709
0.644764	5.43866	3.99594	4.63218	5.24582	4.74582	4.80748
0.645124	5.43841	3.99478	4.63111	5.24566	4.74566	4.8075
0.645484	5.43815	3.99294	4.62981	5.24531	4.74567	4.8072
0.645844	5.43803	3.99061	4.62851	5.24476	4.74587	4.80668
0.646204	5.43818	3.98802	4.62744	5.244	4.74616	4.80611
0.646564	5.43872	3.98542	4.62686	5.2431	4.74645	4.80569
0.646924	5.43965	3.98309	4.62692	5.24217	4.7466	4.80553
0.647284	5.44094	3.98129	4.62768	5.24136	4.74651	4.8057
0.647644	5.44246	3.98024	4.62911	5.24089	4.74609	4.80617
0.648004	5.4441	3.98004	4.63105	5.24092	4.74531	4.8069
0.648364	5.44574	3.98066	4.63325	5.2415	4.7443	4.80778
0.648724	5.44725	3.98192	4.63545	5.24257	4.7433	4.80866
0.649084	5.44853	3.98357	4.63732	5.24397	4.7425	4.80938
0.649444	5.44946	3.98533	4.63867	5.24544	4.74208	4.80976
0.649804	5.44996	3.98691	4.63936	5.24675	4.74206	4.80974
0.650164	5.45	3.98811	4.63935	5.24769	4.74238	4.80935
0.650524	5.44955	3.98877	4.6387	5.24819	4.74293	4.80872
0.650884	5.44863	3.98884	4.63756	5.24824	4.74352	4.80797
0.651244	5.44724	3.98842	4.63623	5.2479	4.74394	4.80725
0.651604	5.44547	3.98765	4.63498	5.24729	4.74402	4.80666
0.651964	5.44342	3.9867	4.63405	5.24654	4.74368	4.80634
0.652324	5.44125	3.98571	4.63356	5.24578	4.743	4.80638
0.652684	5.43913	3.98479	4.63351	5.24508	4.74213	4.80677
0.653044	5.4372	3.98401	4.63386	5.2444	4.74123	4.80743
0.653404	5.43559	3.98341	4.63457	5.2437	4.74041	4.80814
0.653764	5.4344	3.98297	4.63548	5.24292	4.73974	4.80874
0.654124	5.43367	3.98259	4.63647	5.24202	4.73922	4.80915
0.654484	5.43337	3.98223	4.63735	5.24105	4.73881	4.8093
0.654844	5.43346	3.98189	4.63808	5.24004	4.7384	4.8092
0.655204	5.43382	3.98161	4.6387	5.23911	4.73794	4.80884
0.655564	5.43435	3.98148	4.63929	5.23834	4.73741	4.80825
0.655924	5.43497	3.98153	4.63986	5.23785	4.73691	4.80754
0.656284	5.43562	3.98175	4.64037	5.23769	4.73655	4.80686
0.656644	5.43625	3.98213	4.64074	5.23784	4.73645	4.80633
0.657004	5.43687	3.98263	4.64094	5.23825	4.73666	4.80599
0.657364	5.43743	3.98317	4.64101	5.23885	4.73718	4.80579
0.657724	5.43791	3.98367	4.64097	5.23959	4.73793	4.80567
0.658084	5.43832	3.98403	4.64086	5.2404	4.73877	4.80559
0.658444	5.43869	3.98417	4.64069	5.24124	4.73952	4.80557
0.658804	5.43907	3.98407	4.64053	5.2421	4.74006	4.8056
0.659164	5.43951	3.98379	4.64048	5.243	4.74033	4.80565
0.659524	5.44002	3.98344	4.64064	5.24397	4.74036	4.80571
0.659884	5.4406	3.98313	4.64106	5.24496	4.74028	4.80579
0.660244	5.44121	3.98291	4.64171	5.24589	4.7402	4.80593
0.660604	5.44184	3.9828	4.64251	5.24665	4.74026	4.80621
0.660964	5.4424	3.98275	4.64337	5.24709	4.74058	4.80669
0.661324	5.4428	3.98272	4.64424	5.24717	4.74119	4.80739
0.661684	5.44289	3.98268	4.64507	5.24684	4.74204	4.80832
0.662044	5.44258	3.9826	4.64581	5.24617	4.74299	4.80949
0.662404	5.44186	3.98242	4.6464	5.24532	4.74384	4.81087
0.662764	5.44082	3.98214	4.64672	5.24447	4.74446	4.81241
0.663124	5.43967	3.98184	4.64668	5.24382	4.74474	4.81398
0.663484	5.43864	3.98162	4.64625	5.24346	4.74465	4.81544
0.663844	5.43792	3.98156	4.64548	5.24342	4.74416	4.81659
0.664204	5.43769	3.9817	4.64451	5.24366	4.74329	4.81732
0.664564	5.43803	3.982	4.64345	5.24409	4.74216	4.81753
0.664924	5.43898	3.98238	4.64244	5.24459	4.74091	4.81721
0.665284	5.44047	3.98278	4.64163	5.24502	4.73975	4.81641
0.665644	5.44226	3.98313	4.64112	5.24532	4.73881	4.8153
0.666004	5.44403	3.98337	4.64106	5.24547	4.73821	4.81409
0.666364	5.44549	3.98346	4.64152	5.24563	4.73796	4.81298
0.666724	5.44642	3.98337	4.64246	5.24593	4.73809	4.81213
0.667084	5.44673	3.98316	4.64372	5.24643	4.73859	4.81161
0.667444	5.44643	3.98288	4.64512	5.2471	4.7394	4.81139
0.667804	5.44559	3.98262	4.64646	5.24778	4.74042	4.81138
0.668164	5.44434	3.98241	4.64763	5.24834	4.74151	4.81142
0.668524	5.44289	3.98226	4.64849	5.24868	4.74254	4.81133
0.668884	5.44149	3.98217	4.64892	5.24871	4.74342	4.811
0.669244	5.44033	3.98211	4.64883	5.24836	4.74412	4.81033
0.669604	5.43955	3.98208	4.64826	5.24765	4.74467	4.80938
0.669964	5.43913	3.98212	4.64736	5.2467	4.74514	4.80829
0.670324	5.43903	3.98229	4.64637	5.24576	4.74564	4.80723
0.670684	5.43916	3.98265	4.64553	5.24507	4.74623	4.80636
0.671044	5.43942	3.98322	4.64496	5.24477	4.74697	4.80579
0.671404	5.43975	3.98402	4.64473	5.24485	4.74783	4.80554
0.671764	5.44005	3.98505	4.64485	5.24522	4.74877	4.80559
0.672124	5.44031	3.9863	4.64522	5.24575	4.74968	4.80586
0.672484	5.44053	3.98774	4.64571	5.24634	4.75041	4.80615
0.672844	5.44079	3.98926	4.64614	5.24689	4.7508	4.80629
0.673204	5.44111	3.99069	4.64634	5.24732	4.75071	4.80614
0.673564	5.44149	3.99188	4.64624	5.24756	4.7501	4.80569
0.673924	5.4419	3.99274	4.64582	5.24763	4.74907	4.80498
0.674284	5.44227	3.99328	4.64521	5.24753	4.74778	4.80408
0.674644	5.44256	3.99354	4.64455	5.2473	4.74642	4.80311
0.675004	5.44274	3.99358	4.64401	5.24696	4.74518	4.80219
0.675364	5.44283	3.99349	4.64368	5.24647	4.74422	4.80148
0.675724	5.44287	3.99334	4.64356	5.24583	4.74364	4.80106
0.676084	5.44286	3.99327	4.64357	5.24507	4.74346	4.80098
0.676444	5.44287	3.99332	4.6436	5.24421	4.7436	4.8012
0.676804	5.44291	3.99355	4.6435	5.24334	4.74395	4.80163
0.677164	5.44305	3.99393	4.64318	5.24259	4.7444	4.8022
0.677524	5.44329	3.99435	4.64256	5.2421	4.74486	4.80282
0.677884	5.44357	3.99472	4.64162	5.24197	4.7453	4.80343
0.678244	5.44377	3.99489	4.64047	5.24226	4.74569	4.80396
0.678604	5.44376	3.99482	4.63926	5.24291	4.74605	4.80441
0.678964	5.44347	3.99446	4.63823	5.24383	4.74638	4.80481
0.679324	5.44283	3.99381	4.6376	5.24486	4.74669	4.8052
0.679684	5.44186	3.99287	4.63751	5.24589	4.74694	4.80563
0.680044	5.44059	3.99166	4.63797	5.24678	4.74707	4.80614
0.680404	5.43912	3.99028	4.63892	5.2474	4.74706	4.80677
0.680764	5.43757	3.98887	4.64021	5.24767	4.74689	4.80754
0.681124	5.43609	3.9876	4.64167	5.2476	4.74662	4.80842
0.681484	5.43482	3.98661	4.64311	5.24729	4.74632	4.8093
0.681844	5.43385	3.986	4.6443	5.24693	4.74604	4.81009
0.682204	5.43317	3.98579	4.64509	5.24663	4.74587	4.81068
0.682564	5.43268	3.98602	4.64545	5.24647	4.74586	4.81097
0.682924	5.4323	3.98666	4.64555	5.24647	4.74606	4.81087
0.683284	5.43189	3.98767	4.64566	5.24659	4.74641	4.8103
0.683644	5.43143	3.98891	4.64602	5.24679	4.74683	4.80925
0.684004	5.43092	3.99024	4.64678	5.247	4.74721	4.80783
0.684364	5.43041	3.99155	4.64795	5.24708	4.74749	4.8062
0.684724	5.42996	3.99281	4.64948	5.24693	4.74766	4.80455
0.685084	5.42963	3.994	4.65123	5.24648	4.74769	4.80307
0.685444	5.42955	3.99514	4.65297	5.24575	4.74752	4.80194
0.685804	5.42979	3.99626	4.65435	5.24486	4.74713	4.8013
0.686164	5.43035	3.99736	4.6551	5.24392	4.74654	4.80122
0.686524	5.43112	3.9984	4.65506	5.24307	4.74581	4.80165
0.686884	5.43194	3.99932	4.65426	5.24246	4.745	4.80238
0.687244	5.43265	4.00004	4.65289	5.24214	4.74412	4.80316
0.687604	5.43317	4.0005	4.65119	5.24219	4.74316	4.80374
0.687964	5.43348	4.0006	4.64945	5.24259	4.74215	4.80395
0.688324	5.4336	4.00029	4.64794	5.2433	4.7412	4.80368
0.688684	5.43352	3.99961	4.64694	5.2442	4.74045	4.80291
0.689044	5.43325	3.99863	4.64664	5.24519	4.74002	4.8017
0.689404	5.43288	3.9975	4.64707	5.24616	4.73996	4.80024
0.689764	5.43253	3.9964	4.64814	5.24703	4.7403	4.79884
0.690124	5.4323	3.99548	4.64965	5.24776	4.74108	4.79779
0.690484	5.43222	3.99485	4.65134	5.24836	4.74234	4.79736
0.690844	5.43227	3.99456	4.65299	5.24884	4.744	4.79765
0.691204	5.43243	3.99468	4.6544	5.24929	4.74594	4.79865
0.691564	5.43268	3.99521	4.65541	5.24974	4.74797	4.80024
0.691924	5.43296	3.99609	4.65595	5.25023	4.74992	4.80226
0.692284	5.43323	3.99718	4.65606	5.25072	4.75163	4.80446
0.692644	5.43336	3.9983	4.65591	5.2511	4.75297	4.8066
0.693004	5.4333	3.99927	4.65572	5.25128	4.75388	4.8084
0.693364	5.43301	3.99998	4.65568	5.2512	4.75431	4.80968
0.693724	5.43255	4.00036	4.65589	5.25081	4.75429	4.81039
0.694084	5.43204	4.00038	4.65633	5.25008	4.75385	4.8106
0.694444	5.43162	4.00004	4.65693	5.24907	4.75311	4.8105
0.694804	5.43141	3.99936	4.65757	5.24787	4.75217	4.81024
0.695164	5.43147	3.99842	4.65807	5.24663	4.75113	4.80996
0.695524	5.43179	3.99733	4.65829	5.24555	4.75007	4.80974
0.695884	5.4323	3.99616	4.65816	5.24473	4.74908	4.80958
0.696244	5.43291	3.99503	4.6577	5.24424	4.74818	4.80952
0.696604	5.43353	3.99396	4.65702	5.24407	4.74741	4.80953
0.696964	5.43406	3.99299	4.65632	5.24416	4.74681	4.80955
0.697324	5.43441	3.99217	4.65575	5.24445	4.74638	4.80956
0.697684	5.43457	3.99151	4.65545	5.24484	4.74609	4.80954
0.698044	5.43461	3.99109	4.65551	5.24523	4.74589	4.80953
0.698404	5.43468	3.99092	4.65595	5.24551	4.74573	4.80961
0.698764	5.43486	3.99107	4.65668	5.24563	4.74553	4.80977
0.699124	5.43521	3.99154	4.6576	5.24559	4.74524	4.81
0.699484	5.43572	3.99227	4.6586	5.24546	4.74485	4.81023
0.699844	5.4364	3.99317	4.65963	5.24532	4.74437	4.81033
0.700204	5.4372	3.99418	4.66068	5.24526	4.74387	4.81021
0.700564	5.43807	3.99525	4.66167	5.24536	4.74339	4.80981
0.700924	5.4389	3.99634	4.66251	5.24567	4.74298	4.80912
0.701284	5.43961	3.9974	4.66309	5.24622	4.74271	4.80822
0.701644	5.44012	3.99835	4.66338	5.24693	4.74261	4.80724
0.702004	5.44041	3.99911	4.66338	5.24761	4.74272	4.80637
0.702364	5.44047	3.99972	4.66315	5.24815	4.74303	4.80577
0.702724	5.44032	4.00019	4.66267	5.24842	4.74349	4.80559
0.703084	5.44	4.00057	4.66197	5.24835	4.74409	4.80588
0.703445	5.43961	4.00087	4.66114	5.24791	4.74482	4.80667
0.703805	5.43922	4.00112	4.66029	5.24712	4.74566	4.8079
0.704165	5.43893	4.00141	4.65956	5.24606	4.74662	4.80945
0.704525	5.43877	4.0019	4.65901	5.2449	4.74759	4.81116
0.704885	5.43872	4.00267	4.65863	5.24381	4.74851	4.81281
0.705245	5.43873	4.00376	4.6584	5.24287	4.74927	4.81418
0.705605	5.43874	4.00507	4.65823	5.24212	4.74983	4.81513
0.705965	5.43873	4.00648	4.65809	5.24154	4.75016	4.81559
0.706325	5.43871	4.0078	4.65785	5.24114	4.75022	4.81555
0.706685	5.43872	4.00885	4.65745	5.2409	4.75	4.81509
0.707045	5.4388	4.00945	4.65683	5.24082	4.7495	4.81432
0.707405	5.43906	4.0094	4.65595	5.2409	4.74883	4.81346
0.707765	5.43961	4.0086	4.65484	5.24116	4.74809	4.81275
0.708125	5.4405	4.00705	4.65353	5.24158	4.74741	4.81237
0.708485	5.44168	4.00485	4.65212	5.24213	4.74687	4.81244
0.708845	5.44304	4.00215	4.65077	5.24272	4.74652	4.81294
0.709205	5.44438	3.99916	4.64963	5.24328	4.74641	4.81378
0.709565	5.44549	3.99609	4.64883	5.24377	4.74656	4.8148
0.709925	5.44619	3.99318	4.64842	5.24409	4.74693	4.81584
0.710285	5.44639	3.99069	4.64835	5.24423	4.74747	4.81671
0.710645	5.44605	3.98883	4.64858	5.24417	4.74808	4.81732
0.711005	5.44524	3.98775	4.64908	5.24406	4.74864	4.81761
0.711365	5.44413	3.98749	4.6498	5.24403	4.74905	4.81762
0.711725	5.44293	3.98799	4.65068	5.24423	4.74926	4.81743
0.712085	5.44181	3.98917	4.65165	5.24465	4.74924	4.81713
0.712445	5.44095	3.99081	4.65267	5.24525	4.74899	4.8168
0.712805	5.44041	3.99267	4.6537	5.24592	4.74857	4.8165
0.713165	5.44022	3.99445	4.65471	5.24652	4.74805	4.81627
0.713525	5.44032	3.99589	4.65568	5.24696	4.74754	4.81611
0.713885	5.44059	3.99684	4.65657	5.24715	4.74712	4.81603
0.714245	5.44088	3.99727	4.65733	5.24706	4.74687	4.81598
0.714605	5.4411	3.99725	4.65792	5.24676	4.74679	4.81595
0.714965	5.44119	3.99689	4.65832	5.24642	4.74688	4.81593
0.715325	5.44119	3.99638	4.65856	5.24619	4.74712	4.81595
0.715685	5.44115	3.99588	4.65869	5.24622	4.7474	4.81599
0.716045	5.44116	3.99551	4.65883	5.24659	4.74761	4.81599
0.716405	5.44131	3.99536	4.65901	5.24731	4.74766	4.81591
0.716765	5.44167	3.99536	4.65923	5.24833	4.74752	4.81572
0.717125	5.4423	3.99548	4.65943	5.24949	4.74717	4.81545
0.717485	5.44326	3.99563	4.65959	5.25064	4.74668	4.81515
0.717845	5.44454	3.99576	4.65968	5.25162	4.7461	4.81489
0.718205	5.44606	3.99579	4.65972	5.25236	4.7455	4.81471
0.718565	5.44769	3.99573	4.65971	5.25283	4.74496	4.81465
0.718925	5.44929	3.99563	4.65968	5.25305	4.74455	4.81473
[truncated: 6,332 more rows]

## Sheet: 1S1C
neg													neg/TCEP													TMEM16F no Ca2+													TMEM16F 100 μM Ca2+
	Measurement 1			Measurement 2			Measurement 3			Average	Std.Dev			Measurement 1			Measurement 2			Measurement 3			Average	Std.Dev			Measurement 1			Measurement 2			Measurement 3			Average	Std.Dev			Measurement 1			Measurement 2			Measurement 3			Average
time [s]	F	Fmax	F/Fmax	F	Fmax	F/Fmax	F	Fmax	F/Fmax	F/Fmax			time [s]	F	Fmax	F/Fmax	F	Fmax	F/Fmax	F	Fmax	F/Fmax	F/Fmax			time [s]	F	Fmax	F/Fmax	F	Fmax	F/Fmax	F	Fmax	F/Fmax	F/Fmax			time [s]	F	Fmax	F/Fmax	F	Fmax	F/Fmax	F	Fmax	F/Fmax	F/Fmax
0	2255550	2217182	1.0173	2217200	2183432	1.01547	2222050	2201429	1.00937	1.01405	0.00415496		0	2133270	2.1135e+06	1.00935	2106200	2.08738e+06	1.00902	2089530	2.07565e+06	1.00669	1.00835	0.0014514		0	1802480	1815313	0.992931	1816340	1835658	0.989476	1798830	1.8084e+06	0.994706	0.991182	0.00265923		0	1709640	1710122	0.999718	1785570	1789669	0.99771	1781080	1.78192e+06	0.999529	0.999466
3	2247010		1.01345	2197030		1.00623	2232400		1.01407	1.01125	0.00436008		3	2137480		1.01135	2101650		1.00684	2091320		1.00755	1.00858	0.00242375		3	1801640		0.992468	1836830		1.00064	1792380		0.991139	0.99673	0.00514402		3	1681290		0.98314	1800480		1.00604	1783650		1.00097	0.99651
6	2250190		1.01489	2199670		1.00744	2205430		1.00182	1.00805	0.0065563		6	2134350		1.00987	2098080		1.00513	2090530		1.00717	1.00739	0.00237676		6	1807130		0.995492	1836370		1.00039	1803130		0.997083	0.996596	0.00249729		6	1713870		1.00219	1801000		1.00633	1782540		1.00035	1.00325
9	2242110		1.01124	2192840		1.00431	2216780		1.00697	1.00751	0.00349798		9	2126650		1.00622	2098330		1.00525	2081860		1.00299	1.00482	0.00165589		9	1808950		0.996495	1830920		0.997419	1797390		0.993909	0.996313	0.00181918		9	1703180		0.995941	1780390		0.994815	1784080		1.00121	0.99696
12	2235450		1.00824	2192470		1.00414	2208950		1.00342	1.00527	0.00260103		12	2125050		1.00547	2098330		1.00525	2089220		1.00654	1.00575	0.000692029		12	1811920		0.998131	1833470		0.998808	1799410		0.995026	0.997038	0.00201656		12	1709530		0.999654	1800510		1.00606	1782140		1.00012	1.00155
15	2227820		1.0048	2192510		1.00416	2210280		1.00402	1.00433	0.000414962		15	2120020		1.00309	2093330		1.00285	2079710		1.00196	1.00263	0.000595011		15	1815190		0.999932	1839850		1.00228	1797870		0.994175	1.00079	0.004172		15	1706570		0.997923	1788480		0.999336	1780020		0.998934	0.999296
18	2222260		1.00229	2194370		1.00501	2209100		1.00348	1.00359	0.00136297		18	2113430		0.999967	2089900		1.00121	2074170		0.999289	1.00015	0.000973295		18	1817060		1.00096	1830410		0.997141	1808670		1.00015	0.999808	0.00201254		18	1706070		0.997631	1787820		0.998967	1783040		1.00063	0.998883
21	2217240		1.00003	2193480		1.0046	2211740		1.00468	1.0031	0.00266576		21	2120080		1.00311	2089910		1.00121	2081060		1.00261	1.00231	0.000984501		21	1817680		1.0013	1828680		0.996199	1810790		1.00132	0.997311	0.00295193		21	1705790		0.997467	1794180		1.00252	1782010		1.00005	0.999659
24	2218000		1.00037	2189300		1.00269	2196050		0.997557	1.0002	0.00256942		24	2124010		1.00497	2093740		1.00305	2080020		1.00211	1.00338	0.00146092		24	1822170		1.00378	1836600		1.00051	1798330		0.994429	1.00119	0.00474448		24	1710990		1.00051	1789060		0.99966	1780120		0.99899	0.999732
27	2220680		1.00158	2192890		1.00433	2192710		0.996039	1.00065	0.00422335		27	2117700		1.00199	2082980		0.997893	2082280		1.0032	1.00103	0.00277935		27	1818290		1.00164	1834170		0.999189	1807120		0.99929	0.999907	0.00138677		27	1702630		0.995619	1796520		1.00383	1780190		0.999029	0.998718
30	2210880		0.997158	2181690		0.999202	2199810		0.999265	0.998541	0.00119882		30	2104990		0.995974	2086180		0.999426	2073810		0.999115	0.998172	0.00190973		30	1816790		1.00081	1835550		0.999941	1806400		0.998892	1.00213	0.000962394		30	1708820		0.999239	1795480		1.00325	1776050		0.996706	1.00143
33	2212010		0.997667	2177470		0.997269	2196990		0.997984	0.99764	0.000357849		33	2112750		0.999645	2082420		0.997625	2071510		0.998007	0.998426	0.00107347		33	1818350		1.00167	1832130		0.998078	1818590		1.00563	1.00067	0.00377858		33	1711730		1.00094	1783880		0.996765	1785120		1.0018	1.00029
36	2202920		0.993568	2172770		0.995117	2192290		0.995849	0.994844	0.00116471		36	2104200		0.9956	2085560		0.999129	2076650		1.00048	0.998404	0.00252113		36	1822380		1.00389	1834500		0.999369	1812500		1.00226	1.00179	0.00229131		36	1707230		0.998309	1788830		0.999531	1787550		1.00316	0.998229
39	2203700		0.993919	2176290		0.996729	2193600		0.996444	0.995697	0.00154641		39	2101050		0.99411	2083630		0.998204	2072810		0.998633	0.996982	0.00249721		39	1814760		0.999695	1836340		1.00037	1812210		1.0021	1.00121	0.00124251		39	1719280		1.00536	1785790		0.997833	1776300		0.996846	1.00131
42	2207230		0.995511	2166340		0.992172	2192700		0.996035	0.994573	0.00209555		42	2103030		0.995046	2083330		0.99806	2071430		0.997969	0.997025	0.00171429		42	1820440		1.00282	1830370		0.997119	1814830		1.00355	1.00014	0.00352308		42	1714290		1.00244	1782380		0.995927	1783240		1.00074	0.999277
45	2204020		0.994064	2169610		0.99367	2190550		0.995058	0.994264	0.000715621		45	2101390		0.99427	2081710		0.997284	2068260		0.996441	0.995999	0.00155498		45	1825360		1.00553	1839480		1.00208	1809290		1.00049	1.00608	0.00257898		45	1708610		0.999116	1785480		0.997659	1780970		0.999467	0.998181
48	2195910		0.990406	2161270		0.98985	2185150		0.992605	0.990954	0.00145707		48	2097090		0.992236	2075800		0.994453	2060090		0.992505	0.993065	0.00120988		48	1821590		1.00346	1847070		1.00622	1827630		1.01063	1.00343	0.00361839		48	1710770		1.00038	1780510		0.994882	1777940		0.997767	0.998783
51	2185060		0.985512	2173320		0.995369	2184730		0.992414	0.991098	0.00505832		51	2102770		0.994923	2069080		0.991234	2069540		0.997058	0.994405	0.00294653		51	1813060		0.998759	1840760		1.00278	1809530		1.00062	1.00213	0.00201203		51	1719880		1.00571	1787390		0.998727	1783860		1.00109	1.00065
54	2183350		0.984741	2163300		0.99078	2189940		0.994781	0.990101	0.00505439		54	2098130		0.992728	2074620		0.993888	2056090		0.990578	0.992398	0.00167933		54	1814540		0.999574	1839560		1.00213	1817160		1.00484	1.00382	0.00263412		54	1718690		1.00501	1785620		0.997738	1777480		0.997509	1.00262
57	2202250		0.993265	2164820		0.991476	2197330		0.998138	0.994293	0.00344797		57	2092550		0.990088	2072790		0.993011	2053040		0.989109	0.990736	0.00203032		57	1816480		1.00064	1853760		1.00986	1826030		1.00975	0.98403	0.00528942		57	1733580		1.01372	1794010		1.00243	1791010		1.0051	0.987606
60	1966990		0.887158	1920280		0.879478	1959230		0.889981	0.885539	0.00543551		60	1906600		0.902106	1855800		0.889058	1853200		0.89283	0.894665	0.00671461		60	1804370		0.993972	1689940		0.920618	1702770		0.941587	0.915878	0.0377815		60	1658590		0.969866	1586590		0.886527	1686900		0.946676	0.886004
63	1694550		0.764281	1666750		0.763362	1678160		0.762305	0.763316	0.000988874		63	1694310		0.801661	1598810		0.765942	1626120		0.783428	0.783677	0.017861		63	1574750		0.867481	1501070		0.817729	1506480		0.833044	0.815618	0.0254815		63	1359570		0.795013	1412680		0.789353	1428420		0.801619	0.765712
66	1544180		0.696461	1516440		0.694521	1516420		0.688834	0.693272	0.00396362		66	1528680		0.723293	1478550		0.708329	1482360		0.714168	0.715263	0.00754222		66	1448510		0.79794	1378120		0.75075	1377360		0.761644	0.751006	0.024708		66	1218710		0.712645	1257930		0.702884	1270100		0.712771	0.686696
69	1448270		0.653203	1417050		0.649001	1425300		0.647443	0.649882	0.00297937		69	1425200		0.674332	1379590		0.66092	1380490		0.665089	0.66678	0.00686403		69	1331980		0.733747	1279550		0.697053	1273710		0.704328	0.696128	0.0194288		69	1082020		0.632715	1131870		0.632447	1148550		0.644558	0.618271
72	1368140		0.617063	1336710		0.612206	1349980		0.613229	0.614166	0.00256028		72	1352070		0.63973	1318550		0.631677	1311800		0.631996	0.634468	0.00456026		72	1247820		0.687386	1194440		0.650688	1189180		0.657585	0.653233	0.0195038		72	980440		0.573316	1032050		0.576671	1050710		0.589651	0.563711
75	1310780		0.591192	1289080		0.590392	1307440		0.593905	0.59183	0.0018415		75	1304990		0.617455	1272780		0.60975	1283530		0.618376	0.615194	0.00473644		75	1175560		0.64758	1143100		0.622719	1124150		0.621625	0.621993	0.0146792		75	896670		0.524331	944420		0.527707	964280		0.541147	0.516899
78	1284640		0.579402	1254740		0.574664	1265970		0.575067	0.576378	0.00262684		78	1275910		0.603695	1236470		0.592355	1238990		0.596918	0.597656	0.00570596		78	1112760		0.612985	1081970		0.589418	1077230		0.59568	0.589573	0.0122072		78	824070		0.481878	874220		0.488481	888570		0.498659	0.478926
81	1251420		0.564419	1228170		0.562495	1242290		0.564311	0.563742	0.00108086		81	1249890		0.591384	1219080		0.584024	1209630		0.582773	0.58606	0.00465276		81	1067250		0.587915	1035960		0.564353	1024130		0.566317	0.567625	0.0130735		81	766850		0.448418	814210		0.45495	831120		0.466418	0.446576
84	1238580		0.558628	1210130		0.554233	1224930		0.556425	0.556429	0.00219753		84	1233180		0.583478	1204590		0.577083	1207880		0.58193	0.58083	0.00333632		84	1027010		0.565748	1006330		0.548212	995720		0.550607	0.549142	0.00950881		84	713840		0.417421	761720		0.425621	777560		0.436361	0.41708
87	1227470		0.553617	1199870		0.549534	1219930		0.554154	0.552435	0.00252661		87	1220360		0.577412	1195090		0.572532	1190050		0.573339	0.574428	0.0026159		87	1001520		0.551707	969650		0.52823	964720		0.533465	0.532717	0.0123241		87	673420		0.393785	714560		0.399269	727380		0.4082	0.395033
90	1215200		0.548083	1187570		0.543901	1210530		0.549884	0.547289	0.00306956		90	1214780		0.574772	1189220		0.569719	1177480		0.567283	0.570592	0.0038196		90	968190		0.533346	951510		0.518348	937140		0.518214	0.519487	0.00869809		90	635150		0.371406	679260		0.379545	698590		0.392044	0.373089
93	1210390		0.545914	1187240		0.543749	1204030		0.546931	0.545531	0.0016249		93	1206470		0.57084	1175700		0.563242	1176540		0.566831	0.566971	0.00380075		93	942560		0.519227	927730		0.505394	916440		0.506767	0.508505	0.00762133		93	606190		0.354472	644650		0.360206	656310		0.368316	0.356191
96	1201570		0.541936	1180590		0.540704	1206090		0.547867	0.543502	0.00382984		96	1204080		0.569709	1177510		0.564109	1172480		0.564875	0.566231	0.00303629		96	928920		0.511713	915480		0.49872	905820		0.500895	0.500928	0.00695933		96	581590		0.340087	615650		0.344002	630610		0.353894	0.341381
99	1198190		0.540411	1177650		0.539357	1195260		0.542947	0.540905	0.00184531		99	1190440		0.563255	1172250		0.56159	1172680		0.564971	0.563272	0.00169076		99	917660		0.505511	901430		0.491066	890370		0.492351	0.494647	0.00799435		99	549150		0.321117	594340		0.332095	605950		0.340055	0.326564
102	1199580		0.541038	1174600		0.53796	1197090		0.543779	0.540926	0.00291072		102	1195890		0.565834	1177020		0.563875	1163080		0.560346	0.563352	0.00278123		102	898120		0.494747	892780		0.486354	881350		0.487363	0.48772	0.00458193		102	530620		0.310282	575060		0.321322	581760		0.326479	0.316071
105	1196890		0.539825	1168750		0.535281	1195180		0.542911	0.539339	0.00383805		105	1194720		0.56528	1168720		0.559898	1166900		0.562186	0.562455	0.00270106		105	888910		0.489673	879130		0.478918	871760		0.48206	0.483003	0.00553017		105	513280		0.300142	554290		0.309716	564170		0.316608	0.304871
108	1189530		0.536505	1167940		0.53491	1194510		0.542607	0.538007	0.00406214		108	1190310		0.563194	1172110		0.561523	1163720		0.560654	0.56179	0.00129082		108	880170		0.484859	870280		0.474097	868790		0.480418	0.478337	0.00540806		108	499230		0.291927	539060		0.301207	543050		0.304756	0.296415
111	1189920		0.536681	1171800		0.536678	1193240		0.54203	0.538463	0.00308888		111	1192740		0.564344	1168040		0.559573	1169330		0.563357	0.562424	0.00251848		111	870670		0.479625	869330		0.47358	860900		0.476055	0.474612	0.00303936		111	483830		0.282921	521570		0.291434	527650		0.296113	0.288153
114	1191590		0.537434	1166760		0.53437	1195220		0.542929	0.538244	0.00433682		114	1190280		0.56318	1164580		0.557915	1164760		0.561155	0.56075	0.00265559		114	866810		0.477499	860390		0.468709	851090		0.47063	0.472469	0.00462106		114	473490		0.276875	507980		0.28384	516940		0.290103	0.2821
117	1187790		0.535721	1173870		0.537626	1190710		0.54088	0.538076	0.00260918		117	1181730		0.559134	1172750		0.561829	1157280		0.557552	0.559505	0.00216272		117	867860		0.478077	854490		0.465495	852120		0.4712	0.471086	0.00630017		117	461490		0.269858	495990		0.277141	508890		0.285585	0.274683
120	1185640		0.534751	1160090		0.531315	1188890		0.540054	0.535373	0.00440253		120	1181120		0.558846	1165420		0.558318	1161290		0.559484	0.558882	0.000583855		120	858010		0.472651	855310		0.465942	849380		0.469685	0.468244	0.00336216		120	457040		0.267256	482570		0.269642	493680		0.27705	0.269928
123	1189300		0.536402	1162780		0.532547	1194150		0.542443	0.537131	0.0049882		123	1192220		0.564098	1159960		0.555702	1159940		0.558833	0.559544	0.00424282		123	859810		0.473643	855750		0.466182	842970		0.46614	0.468115	0.00431975		123	444950		0.260186	479710		0.268044	486260		0.272886	0.265465
126	1177940		0.531278	1164840		0.53349	1193690		0.542234	0.535668	0.00579347		126	1171820		0.554445	1161340		0.556363	1159720		0.558727	0.556512	0.00214476		126	853890		0.470382	852150		0.46422	840040		0.46452	0.465733	0.00347396		126	435930		0.254912	465340		0.260015	477850		0.268166	0.259484
129	1176680		0.53071	1169010		0.5354	1195400		0.543011	0.536374	0.00620811		129	1184440		0.560417	1166060		0.558624	1154240		0.556087	0.558376	0.00217541		129	846990		0.466581	845070		0.460364	836560		0.462596	0.463895	0.0031495		129	439380		0.256929	463810		0.25916	469580		0.263525	0.258347
132	1177140		0.530917	1160450		0.53148	1187850		0.539581	0.533993	0.00484801		132	1178350		0.557535	1158010		0.554768	1155050		0.556477	0.55626	0.00139644		132	850280		0.468393	848010		0.461965	840440		0.464741	0.465153	0.00322389		132	429420		0.251105	458610		0.256254	461430		0.258951	0.253592
135	1178360		0.531467	1161060		0.531759	1185090		0.538328	0.533851	0.00387925		135	1183200		0.55983	1158640		0.555069	1161870		0.559763	0.558221	0.0027293		135	845370		0.465688	845110		0.460385	841090		0.465101	0.463258	0.0029069		135	421010		0.246187	449960		0.251421	451570		0.253418	0.250164
138	1179010		0.531761	1155030		0.528997	1182980		0.537369	0.532709	0.00426567		138	1182270		0.55939	1156550		0.554068	1161230		0.559455	0.557638	0.00309131		138	848310		0.467308	844070		0.459819	838560		0.463702	0.462879	0.00374539		138	417230		0.243977	442580		0.247297	450620		0.252885	0.246824
141	1173840		0.529429	1152930		0.528036	1191300		0.541148	0.532871	0.00720229		141	1178570		0.557639	1154080		0.552885	1156850		0.557344	0.555956	0.00266387		141	846880		0.46652	843270		0.459383	834600		0.461512	0.462112	0.0036641		141	410530		0.240059	436940		0.244146	444050		0.249198	0.244069
144	1176110		0.530453	1161240		0.531842	1187450		0.5394	0.533898	0.00481494		144	1175200		0.556045	1160600		0.556008	1158750		0.55826	0.556771	0.00128952		144	845700		0.46587	847670		0.46178	832650		0.460433	0.462711	0.00283133		144	405870		0.237334	432270		0.241536	441920		0.248002	0.240581
147	1173790		0.529406	1152970		0.528054	1183500		0.537605	0.531689	0.00516853		147	1180150		0.558387	1156280		0.553939	1151450		0.554743	0.555689	0.00237022		147	846770		0.46646	848400		0.462178	832740		0.460483	0.463066	0.00308007		147	408400		0.238813	432890		0.241883	432780		0.242873	0.240251
150	1172430		0.528793	1154260		0.528645	1181380		0.536642	0.53136	0.00457523		150	1169560		0.553376	1161400		0.556392	1154200		0.556068	0.555278	0.00165549		150	843330		0.464565	841950		0.458664	832880		0.460561	0.461554	0.00301237		150	398750		0.23317	421650		0.235602	427760		0.240056	0.235593
153	1176550		0.530651	1153060		0.528095	1182930		0.537346	0.532031	0.00477746		153	1172570		0.5548	1158530		0.555017	1156260		0.55706	0.555626	0.00124699		153	848260		0.46728	836610		0.455755	834460		0.461434	0.461864	0.00576293		153	392650		0.229604	423100		0.236412	424110		0.238007	0.234575
156	1173640		0.529339	1155360		0.529149	1181180		0.536551	0.53168	0.00422028		156	1174700		0.555808	1155720		0.553671	1153940		0.555942	0.55514	0.00127465		156	838540		0.461926	838920		0.457013	836490		0.462557	0.45959	0.00303492		156	393160		0.229902	416320		0.232624	423580		0.23771	0.232086
159	1172670		0.528901	1148170		0.525856	1181140		0.536533	0.53043	0.00550059		159	1174660		0.555789	1155590		0.553608	1152940		0.555461	0.554953	0.00117582		159	842030		0.463848	839280		0.457209	831560		0.459831	0.459599	0.0033439		159	390750		0.228492	417510		0.233289	416490		0.233731	0.231768
162	1172810		0.528964	1143500		0.523717	1183600		0.537651	0.530111	0.00703737		162	1172270		0.554658	1154560		0.553115	1152470		0.555234	0.554336	0.00109589		162	841290		0.463441	846210		0.460985	827780		0.457741	0.461813	0.00285917		162	386200		0.225832	411440		0.229897	416120		0.233523	0.229042
165	1163980		0.524982	1147910		0.525737	1181930		0.536892	0.529203	0.00666929		165	1171790		0.554431	1152580		0.552166	1152720		0.555355	0.553984	0.00164056		165	842360		0.46403	841910		0.458642	833700		0.461014	0.460574	0.00270045		165	384990		0.225124	408010		0.227981	412330		0.231397	0.227608
168	1166400		0.526073	1147990		0.525773	1181410		0.536656	0.529501	0.00619839		168	1170320		0.553736	1146360		0.549186	1151210		0.554627	0.552516	0.00291809		168	840010		0.462736	841970		0.458675	830150		0.459051	0.459562	0.00224382		168	379290		0.221791	406240		0.226992	409340		0.229719	0.225277
171	1175390		0.530128	1146910		0.525279	1178260		0.535225	0.530211	0.00497378		171	1172660		0.554843	1153720		0.552712	1150470		0.554271	0.553942	0.00110258		171	844650		0.465292	840380		0.457809	826940		0.457276	0.461077	0.00448201		171	381820		0.223271	403000		0.225181	404580		0.227047	0.224695
174	1164030		0.525004	1156030		0.529455	1187490		0.539418	0.531293	0.00738029		174	1164270		0.550873	1156400		0.553996	1153180		0.555576	0.553482	0.00239343		174	835800		0.460416	843340		0.459421	832100		0.460129	0.459558	0.000512323		174	375930		0.219826	399180		0.223047	402060		0.225633	0.22263
177	1166880		0.52629	1144190		0.524033	1178930		0.535529	0.528617	0.0060915		177	1172750		0.554885	1149980		0.550921	1142620		0.550489	0.552098	0.00242336		177	836360		0.460725	843110		0.459296	829760		0.458835	0.460021	0.000985299		177	376480		0.220148	396500		0.221549	400960		0.225016	0.22172
180	1168080		0.526831	1144680		0.524257	1180340		0.53617	0.529086	0.00626835		180	1162900		0.550225	1147650		0.549804	1146990		0.552594	0.550874	0.001504		180	834300		0.45959	836990		0.455962	831940		0.460041	0.459001	0.00223631		180	369510		0.216072	393600		0.219929	398190		0.223461	0.219097
183	1166520		0.526127	1138270		0.521321	1180440		0.536215	0.527888	0.00760144		183	1161160		0.549402	1145620		0.548832	1147420		0.552801	0.550345	0.00214622		183	837340		0.461265	837060		0.456	834490		0.461451	0.45757	0.00309479		183	373150		0.218201	390720		0.21832	394320		0.221289	0.219223
186	1161980		0.52408	1145140		0.524468	1179270		0.535684	0.528077	0.00659047		186	1163830		0.550665	1153920		0.552808	1145180		0.551722	0.551732	0.00107169		186	842160		0.46392	832960		0.453766	823630		0.455446	0.45843	0.00544256		186	369010		0.21578	388660		0.217169	394070		0.221149	0.21712
189	1166280		0.526019	1146220		0.524963	1177130		0.534712	0.528564	0.00534988		189	1165880		0.551635	1147990		0.549967	1149340		0.553726	0.551776	0.00188345		189	839750		0.462592	834550		0.454633	827530		0.457602	0.458611	0.0040224		189	363270		0.212423	390030		0.217934	389190		0.218411	0.216149
192	1160210		0.523281	1137950		0.521175	1175850		0.53413	0.526196	0.00695198		192	1161290		0.549463	1152250		0.552008	1141270		0.549838	0.550437	0.00137395		192	835710		0.460367	836140		0.455499	829350		0.458609	0.457812	0.00246513		192	365820		0.213915	389080		0.217403	388620		0.218091	0.216202
195	1157390		0.522009	1143900		0.5239	1175480		0.533962	0.526624	0.00642511		195	1161040		0.549345	1150900		0.551361	1146200		0.552213	0.550973	0.00147321		195	839640		0.462532	833890		0.454273	827470		0.457569	0.457763	0.0041573		195	367980		0.215178	386130		0.215755	387190		0.217288	0.216117
198	1154280		0.520607	1139600		0.521931	1183270		0.537501	0.526679	0.00939499		198	1166170		0.551772	1149980		0.550921	1140590		0.549511	0.550734	0.00114212		198	837840		0.46154	829530		0.451898	825510		0.456485	0.457096	0.00482306		198	364130		0.212926	384110		0.214626	387420		0.217417	0.214133
201	1154210		0.520575	1135770		0.520176	1178250		0.535221	0.525324	0.0085729		201	1162750		0.550154	1143860		0.547989	1142260		0.550315	0.549486	0.00129913		201	838240		0.461761	838760		0.456926	827980		0.457851	0.458429	0.0025662		201	361760		0.21154	377020		0.210665	382840		0.214847	0.211797
204	1160520		0.523421	1134990		0.519819	1179490		0.535784	0.526341	0.00837332		204	1170470		0.553807	1145350		0.548703	1140270		0.549357	0.550622	0.00277734		204	834840		0.459888	832070		0.453282	825720		0.456601	0.456515	0.00330303		204	359370		0.210143	379390		0.211989	379880		0.213186	0.212394
207	1157310		0.521973	1134320		0.519512	1173940		0.533263	0.524916	0.00733231		207	1161670		0.549643	1141330		0.546777	1141480		0.54994	0.548786	0.00174671		207	833190		0.458979	829830		0.452061	825310		0.456375	0.454808	0.0034937		207	356600		0.208523	373640		0.208776	383200		0.215049	0.209486
210	1161700		0.523953	1133040		0.518926	1169660		0.531319	0.524733	0.00623282		210	1160430		0.549056	1146010		0.549019	1141860		0.550123	0.549399	0.000626754		210	833740		0.459282	835400		0.455096	819900		0.453383	0.456755	0.0030345		210	352000		0.205833	374770		0.209407	376270		0.21116	0.209023
213	1156750		0.521721	1134630		0.519654	1177830		0.53503	0.525468	0.00834466		213	1162010		0.549804	1150950		0.551385	1136500		0.54754	0.549576	0.00193262		213	834890		0.459915	831210		0.452813	824430		0.455888	0.456386	0.00356166		213	354080		0.20705	369580		0.206507	377460		0.211828	0.208278
216	1149030		0.518239	1137950		0.521175	1169600		0.531291	0.523568	0.00684744		216	1158650		0.548214	1139600		0.545948	1140170		0.549308	0.547823	0.00171392		216	839280		0.462333	832800		0.453679	825410		0.45643	0.456382	0.00442179		216	353800		0.206886	372700		0.208251	376480		0.211278	0.207619
219	1151570		0.519385	1135230		0.519929	1169700		0.531337	0.52355	0.00674886		219	1163180		0.550357	1147290		0.549632	1145030		0.55165	0.550546	0.00102211		219	833600		0.459205	833800		0.454224	819450		0.453134	0.455657	0.0032363		219	351820		0.205728	372410		0.208089	370140		0.20772	0.207622
222	1145370		0.516588	1133750		0.519251	1174530		0.533531	0.523123	0.00911083		222	1154170		0.546094	1150170		0.551012	1135450		0.547034	0.548047	0.00261036		222	831540		0.45807	826270		0.450122	820190		0.453543	0.454621	0.00398668		222	350710		0.205079	367760		0.205491	372510		0.20905	0.205969
225	1145640		0.51671	1124700		0.515106	1163090		0.528334	0.52005	0.00721874		225	1162180		0.549884	1141840		0.547021	1136010		0.547304	0.54807	0.00157767		225	834180		0.459524	834160		0.45442	824040		0.455672	0.45613	0.00265999		225	348120		0.203564	367040		0.205088	369460		0.207338	0.204883
228	1149390		0.518401	1131870		0.51839	1172810		0.532749	0.52318	0.00828706		228	1158380		0.548086	1143220		0.547682	1145520		0.551886	0.549218	0.00231918		228	825920		0.454974	827040		0.450541	821820		0.454445	0.45346	0.00242083		228	347790		0.203371	371110		0.207362	367070		0.205997	0.206469
231	1152810		0.519944	1127950		0.516595	1168470		0.530778	0.522439	0.0074134		231	1159850		0.548782	1135940		0.544195	1145010		0.55164	0.548205	0.00375612		231	831090		0.457822	826070		0.450013	822580		0.454865	0.454408	0.00394257		231	345530		0.20205	364650		0.203753	371840		0.208674	0.203883
234	1148350		0.517932	1130200		0.517625	1172380		0.532554	0.522704	0.00853187		234	1159820		0.548768	1140110		0.546192	1140340		0.54939	0.548117	0.00169544		234	828200		0.45623	835160		0.454965	823530		0.45539	0.454957	0.000643664		234	344700		0.201565	360240		0.201289	366800		0.205845	0.202617
237	1153850		0.520413	1128800		0.516984	1176070		0.53423	0.523876	0.00912963		237	1154340		0.546175	1147510		0.549737	1134750		0.546697	0.547536	0.00192391		237	833180		0.458973	835530		0.455166	820430		0.453676	0.456875	0.00273163		237	347820		0.203389	364720		0.203792	365290		0.204998	0.203334
240	1157200		0.521924	1123180		0.51441	1164680		0.529056	0.521797	0.00732383		240	1154420		0.546213	1149890		0.550878	1140320		0.549381	0.548824	0.00238186		240	831090		0.457822	829940		0.452121	825510		0.456485	0.454975	0.00298128		240	347670		0.203301	361730		0.202121	361410		0.202821	0.203219
243	1145870		0.516814	1124660		0.515088	1167400		0.530292	0.520731	0.0083246		243	1150690		0.544448	1136900		0.544654	1135530		0.547073	0.545392	0.00145965		243	832240		0.458455	828870		0.451538	822790		0.454981	0.454505	0.00345852		243	343270		0.200728	361150		0.201797	363930		0.204235	0.202199
246	1145070		0.516453	1124350		0.514946	1170460		0.531682	0.521027	0.00925814		246	1153330		0.545697	1131260		0.541953	1134850		0.546745	0.544798	0.0025196		246	828360		0.456318	830760		0.452568	820150		0.453521	0.45404	0.00194906		246	343970		0.201138	359340		0.200786	363640		0.204072	0.201394
249	1145140		0.516484	1119310		0.512638	1168620		0.530846	0.519989	0.0095968		249	1160530		0.549104	1142210		0.547198	1139240		0.54886	0.548387	0.00103692		249	827920		0.456076	829460		0.45186	819630		0.453234	0.454103	0.00215009		249	339770		0.198682	357930		0.199998	360410		0.202259	0.200313
252	1146610		0.517147	1121950		0.513847	1169170		0.531096	0.520697	0.00915586		252	1152840		0.545465	1141990		0.547093	1132910		0.545811	0.546123	0.00085769		252	830310		0.457392	826240		0.450106	821690		0.454373	0.45328	0.00366105		252	339200		0.198348	355450		0.198612	360410		0.202259	0.199046
255	1135790		0.512267	1114740		0.510545	1165930		0.529624	0.517479	0.0105534		255	1145780		0.542125	1141530		0.546873	1134320		0.54649	0.545162	0.00263775		255	828920		0.456626	824690		0.449261	818020		0.452343	0.453977	0.0036989		255	340500		0.199109	358020		0.200048	356700		0.200177	0.200197
258	1138860		0.513652	1113020		0.509757	1163670		0.528598	0.517336	0.0099457		258	1148490		0.543407	1134750		0.543624	1131620		0.545189	0.544073	0.000972332		258	829070		0.456709	827920		0.451021	824710		0.456043	0.453232	0.0031097		258	333820		0.195202	357460		0.199735	358940		0.201434	0.198523
261	1139650		0.514008	1113180		0.50983	1160660		0.52723	0.517023	0.00908323		261	1154680		0.546336	1137740		0.545057	1134780		0.546712	0.546035	0.000867427		261	828430		0.456357	828760		0.451478	817340		0.451967	0.453349	0.00268637		261	338690		0.19805	348870		0.194935	357510		0.200632	0.197708
264	1140430		0.51436	1118880		0.512441	1163770		0.528643	0.518481	0.00885239		264	1144730		0.541628	1142000		0.547098	1132780		0.545748	0.544825	0.00284952		264	827390		0.455784	824750		0.449294	817780		0.452211	0.452557	0.00325039		264	336760		0.196922	349040		0.19503	356630		0.200138	0.197128
267	1137650		0.513106	1112660		0.509592	1161950		0.527816	0.516838	0.00966822		267	1146340		0.54239	1127680		0.540237	1127590		0.543248	0.541958	0.00155075		267	824610		0.454252	825760		0.449844	818470		0.452592	0.451898	0.00222633		267	333640		0.195097	350620		0.195913	355370		0.199431	0.196335
270	1141170		0.514694	1108700		0.507779	1164410		0.528934	0.517135	0.0107868		270	1150500		0.544358	1130150		0.541421	1122190		0.540646	0.542142	0.00195807		270	833850		0.459342	831750		0.453107	816670		0.451597	0.455036	0.00410581		270	336970		0.197044	349870		0.195494	352810		0.197994	0.19746
273	1137470		0.513025	1117130		0.511639	1160260		0.527049	0.517238	0.00852465		273	1147630		0.543	1137010		0.544707	1130900		0.544842	0.544183	0.00102692		273	826490		0.455288	826440		0.450215	818590		0.452659	0.451755	0.00253721		273	330380		0.193191	348670		0.194824	356100		0.199841	0.195071
276	1135860		0.512299	1112400		0.509473	1160750		0.527271	0.516348	0.00956487		276	1145180		0.541841	1137610		0.544995	1119310		0.539258	0.542031	0.0028728		276	830760		0.45764	823430		0.448575	813350		0.449761	0.452073	0.00492721		276	330670		0.19336	348640		0.194807	351390		0.197197	0.195155
279	1136640		0.512651	1112490		0.509514	1164780		0.529102	0.517089	0.0105209		279	1150080		0.544159	1139190		0.545752	1128180		0.543532	0.544481	0.00114427		279	825560		0.454776	820730		0.447104	813790		0.450004	0.451677	0.00387362		279	328250		0.191945	348850		0.194924	351570		0.197298	0.194745
282	1134390		0.511636	1105300		0.506221	1162670		0.528143	0.515334	0.0114191		282	1148350		0.543341	1132350		0.542475	1127060		0.542992	0.542936	0.000435685		282	824870		0.454395	825030		0.449446	819480		0.453151	0.452196	0.00257436		282	327800		0.191682	349330		0.195193	351690		0.197366	0.194085
285	1132190		0.510644	1110730		0.508708	1156460		0.525322	0.514891	0.00908515		285	1150650		0.544429	1130660		0.541665	1123470		0.541263	0.542452	0.00172358		285	827850		0.456037	826650		0.450329	818750		0.452747	0.452387	0.00286511		285	332250		0.194284	344140		0.192293	348150		0.195379	0.19407
288	1132370		0.510725	1103780		0.505525	1163770		0.528643	0.514964	0.012128		288	1145340		0.541916	1134840		0.543668	1125200		0.542096	0.54256	0.000963355		288	832040		0.458345	826260		0.450117	815220		0.450795	0.453786	0.00456754		288	328360		0.19201	347930		0.19441	348600		0.195632	0.194021
291	1125510		0.507631	1109540		0.508163	1158230		0.526126	0.513974	0.0105281		291	1140460		0.539607	1130490		0.541584	1123290		0.541176	0.540789	0.00104339		291	828070		0.456158	831170		0.452791	819020		0.452896	0.452091	0.00191427		291	327250		0.191361	345120		0.19284	348620		0.195643	0.19368
294	1133370		0.511176	1106290		0.506675	1160970		0.527371	0.515074	0.0108848		294	1141610		0.540152	1133320		0.542939	1118600		0.538916	0.540669	0.00206082		294	829740		0.457078	826560		0.45028	808940		0.447322	0.452091	0.00500228		294	324840		0.189951	342470		0.191359	350750		0.196838	0.191343
297	1131890		0.510508	1102180		0.504792	1161820		0.527757	0.514353	0.0119553		297	1137510		0.538212	1133360		0.542959	1127150		0.543036	0.541402	0.00276316		297	824960		0.454445	824870		0.449359	811820		0.448915	0.451631	0.00307254		297	324760		0.189905	342000		0.191097	343410		0.192719	0.191938
300	1121590		0.505863	1105600		0.506359	1156080		0.52515	0.512457	0.010995		300	1141760		0.540223	1125870		0.53937	1125870		0.542419	0.540671	0.00157294		300	822220		0.452936	819980		0.446695	815750		0.451088	0.450161	0.00320548		300	327660		0.1916	344010		0.19222	347140		0.194812	0.191888
303	1133950		0.511437	1100380		0.503968	1156440		0.525313	0.513573	0.0108317		303	1142560		0.540601	1125040		0.538973	1124150		0.54159	0.540388	0.00132174		303	828730		0.456522	821740		0.447654	815320		0.45085	0.451025	0.00449102		303	328160		0.191893	340240		0.190113	341850		0.191844	0.19141
306	1132780		0.51091	1099660		0.503638	1158420		0.526213	0.513587	0.0115229		306	1136040		0.537516	1129610		0.541162	1132050		0.545396	0.541358	0.00394378		306	824900		0.454412	818720		0.446009	811790		0.448898	0.450077	0.00426923		306	323720		0.189296	342780		0.191533	342530		0.192225	0.191804
309	1128420		0.508943	1102610		0.504989	1156870		0.525509	0.513147	0.0108864		309	1141650		0.54017	1129110		0.540923	1120170		0.539673	0.540255	0.000629142		309	827640		0.455921	818010		0.445622	813440		0.449811	0.450393	0.00517938		309	324060		0.189495	338140		0.18894	346730		0.194582	0.190013
312	1128350		0.508912	1101260		0.504371	1161880		0.527784	0.513689	0.0124163		312	1133810		0.536461	1129670		0.541191	1117510		0.538391	0.538681	0.00237818		312	825060		0.4545	819290		0.44632	813120		0.449634	0.450081	0.00411476		312	327080		0.191261	338960		0.189398	341420		0.191602	0.190926
315	1123460		0.506706	1096490		0.502186	1152760		0.523642	0.510845	0.0113105		315	1142740		0.540686	1129400		0.541061	1119240		0.539225	0.540324	0.000970387		315	821080		0.452308	823390		0.448553	812740		0.449424	0.449262	0.0019652		315	319800		0.187004	336960		0.188281	342340		0.192119	0.188961
318	1125150		0.507468	1098410		0.503066	1153960		0.524187	0.511574	0.0111429		318	1137070		0.538003	1123560		0.538264	1121330		0.540232	0.538833	0.00121832		318	823960		0.453894	825500		0.449703	808220		0.446924	0.451132	0.00350872		318	320780		0.187577	341570		0.190857	341410		0.191597	0.189821
321	1125040		0.507419	1094270		0.50117	1150470		0.522601	0.510397	0.0110218		321	1138880		0.53886	1129320		0.541023	1118130		0.53869	0.539524	0.00130077		321	825020		0.454478	820370		0.446908	813420		0.4498	0.449931	0.00382008		321	322320		0.188478	337440		0.188549	340400		0.19103	0.18962
324	1127580		0.508564	1097490		0.502644	1158360		0.526185	0.512465	0.0122456		324	1136970		0.537956	1130530		0.541603	1110820		0.535168	0.538242	0.00322683		324	825250		0.454605	817210		0.445186	810900		0.448406	0.448953	0.00478705		324	322970		0.188858	339490		0.189694	341830		0.191832	0.189889
327	1120420		0.505335	1098590		0.503148	1150910		0.522801	0.510428	0.010771		327	1139360		0.539087	1123060		0.538024	1117790		0.538526	0.538546	0.000531681		327	824620		0.454258	819620		0.446499	808480		0.447068	0.449443	0.0043245		327	320520		0.187425	336500		0.188024	340550		0.191114	0.188804
330	1123190		0.506584	1091870		0.500071	1158620		0.526304	0.510986	0.0136592		330	1135580		0.537298	1129740		0.541224	1119900		0.539543	0.539355	0.00196964		330	818230		0.450738	823000		0.448341	809390		0.447571	0.448953	0.00165145		330	321620		0.188068	337130		0.188376	340280		0.190963	0.189036
333	1117610		0.504068	1098710		0.503203	1153160		0.523823	0.510365	0.0116635		333	1134520		0.536797	1127460		0.540132	1116580		0.537943	0.538291	0.0016945		333	822220		0.452936	818750		0.446025	809770		0.447781	0.448186	0.00359171		333	319980		0.187109	337350		0.188499	339750		0.190665	0.188066
336	1122020		0.506057	1093010		0.500593	1149490		0.522156	0.509602	0.0112104		336	1134250		0.536669	1129920		0.541311	1123550		0.541301	0.53976	0.00267702		336	826450		0.455266	813880		0.443372	805820		0.445597	0.448128	0.00632307		336	319150		0.186624	337900		0.188806	336050		0.188589	0.188096
339	1118430		0.504438	1090360		0.499379	1155410		0.524845	0.509554	0.0134822		339	1137540		0.538226	1125690		0.539284	1116310		0.537813	0.538441	0.000758708		339	826380		0.455227	815480		0.444244	806090		0.445747	0.448778	0.00595505		339	319370		0.186753	336030		0.187761	336530		0.188858	0.186984
342	1122710		0.506368	1094340		0.501202	1149080		0.52197	0.509847	0.0108123		342	1138480		0.538671	1123460		0.538216	1116760		0.53803	0.538305	0.000329591		342	815510		0.449239	819980		0.446695	808110		0.446864	0.446722	0.00142269		342	316670		0.185174	333050		0.186096	332220		0.186439	0.186461
345	1115260		0.503008	1095050		0.501527	1153710		0.524073	0.509536	0.0126113		345	1124940		0.532264	1129700		0.541205	1113230		0.536329	0.5366	0.00447663		345	818170		0.450705	818530		0.445906	803350		0.444231	0.448269	0.00336001		345	319760		0.186981	333120		0.186135	335200		0.188112	0.187353
348	1111310		0.501226	1090380		0.499388	1152290		0.523428	0.508014	0.0133805		348	1130350		0.534824	1124210		0.538575	1117470		0.538372	0.537257	0.00210958		348	821220		0.452385	814360		0.443634	810520		0.448196	0.446249	0.00437681		348	313440		0.183285	331180		0.185051	336680		0.188942	0.185786
351	1116510		0.503572	1093030		0.500602	1148910		0.521893	0.508689	0.0115311		351	1123480		0.531573	1118700		0.535935	1119520		0.53936	0.535623	0.00390256		351	818490		0.450881	816440		0.444767	800630		0.442727	0.446265	0.00424309		351	314170		0.183712	331740		0.185364	336820		0.189021	0.185316
354	1112670		0.50184	1090890		0.499622	1146660		0.520871	0.507444	0.0116806		354	1129080		0.534223	1123250		0.538115	1116180		0.537751	0.536696	0.00214963		354	817590		0.450385	816060		0.44456	801390		0.443148	0.447461	0.00383647		354	311220		0.181987	329900		0.184336	332990		0.186872	0.184634
357	1116930		0.503761	1091020		0.499681	1146680		0.52088	0.508107	0.0112478		357	1132340		0.535765	1122820		0.537909	1116590		0.537948	0.537208	0.00124905		357	816780		0.449939	809520		0.440997	809150		0.447439	0.4443	0.00461336		357	315210		0.18432	331570		0.185269	334250		0.187579	0.185154
360	1113110		0.502038	1084170		0.496544	1147930		0.521448	0.506677	0.0130838		360	1128490		0.533944	1123700		0.538331	1119270		0.539239	0.537171	0.00283171		360	825130		0.454539	814540		0.443732	799250		0.441964	0.446503	0.00680723		360	315750		0.184636	329710		0.18423	331210		0.185873	0.185775
363	1116610		0.503617	1082920		0.495971	1145420		0.520307	0.506632	0.012445		363	1126660		0.533078	1122960		0.537976	1112530		0.535992	0.535682	0.0024638		363	816120		0.449575	810640		0.441607	797940		0.44124	0.444873	0.00471004		363	315790		0.184659	330950		0.184922	335820		0.18846	0.185322
366	1108510		0.499963	1084260		0.496585	1147580		0.521289	0.505946	0.0133943		366	1125810		0.532676	1120350		0.536726	1109720		0.534638	0.53468	0.00202536		366	818830		0.451068	814860		0.443906	801910		0.443435	0.44687	0.00427748		366	311000		0.181858	330760		0.184816	332120		0.186383	0.183921
369	1114190		0.502525	1086670		0.497689	1150810		0.522756	0.507657	0.013298		369	1126800		0.533144	1121030		0.537052	1113720		0.536565	0.535587	0.0021295		369	815120		0.449024	807050		0.439652	805890		0.445636	0.444144	0.00474597		369	315980		0.18477	326580		0.182481	329810		0.185087	0.184077
372	1112450		0.50174	1086870		0.497781	1146150		0.520639	0.50672	0.0122158		372	1129470		0.534408	1120740		0.536913	1108350		0.533978	0.535099	0.0015849		372	817890		0.45055	813260		0.443035	802490		0.443756	0.445826	0.00414677		372	311140		0.18194	324030		0.181056	329620		0.18498	0.182623
375	1111020		0.501096	1078640		0.494011	1146000		0.520571	0.505226	0.0137532		375	1124140		0.531886	1113000		0.533205	1111240		0.535371	0.533487	0.00175952		375	816910		0.450011	812950		0.442866	802740		0.443894	0.444755	0.00386259		375	312190		0.182554	329590		0.184163	329430		0.184874	0.183987
378	1111150		0.501154	1086050		0.497405	1148250		0.521593	0.506717	0.0130183		378	1128010		0.533717	1121360		0.53721	1113070		0.536252	0.535726	0.00180493		378	818530		0.450903	805460		0.438785	798210		0.441389	0.444334	0.0063787		378	309180		0.180794	327350		0.182911	330090		0.185244	0.182934
381	1107210		0.499377	1080960		0.495074	1141720		0.518627	0.504359	0.012542		381	1123210		0.531446	1118830		0.535998	1113410		0.536416	0.53462	0.00275685		381	815350		0.449151	809140		0.44079	801690		0.443313	0.444083	0.00428861		381	307350		0.179724	326420		0.182391	329830		0.185098	0.181838
384	1103250		0.497591	1074330		0.492037	1145250		0.52023	0.503286	0.0149344		384	1123480		0.531573	1114860		0.534096	1110670		0.535096	0.533588	0.00181528		384	811920		0.447262	807310		0.439793	799870		0.442307	0.443987	0.00380013		384	313280		0.183192	325850		0.182073	326800		0.183398	0.183585
387	1106090		0.498872	1070720		0.490384	1138940		0.517364	0.502207	0.0137957		387	1122860		0.53128	1113710		0.533545	1102980		0.531391	0.532072	0.00127675		387	812880		0.447791	807510		0.439902	804570		0.444906	0.444117	0.00399133		387	308500		0.180396	325870		0.182084	330530		0.185491	0.182588
390	1104460		0.498137	1076690		0.493118	1141170		0.518377	0.503211	0.0133719		390	1124150		0.53189	1118470		0.535825	1107110		0.533381	0.533699	0.0019866		390	813110		0.447917	805940		0.439047	804120		0.444657	0.443059	0.00448675		390	310930		0.181817	326430		0.182397	330160		0.185283	0.182509
393	1103640		0.497767	1080870		0.495033	1137020		0.516492	0.503097	0.0116804		393	1124970		0.532278	1115150		0.534235	1107150		0.5334	0.533304	0.00098168		393	809670		0.446022	810050		0.441286	799700		0.442213	0.442626	0.00251008		393	310480		0.181554	322410		0.180151	326650		0.183314	0.181933
396	1111680		0.501393	1073710		0.491753	1137920		0.516901	0.503349	0.0126872		396	1126930		0.533206	1115420		0.534364	1112300		0.535881	0.534484	0.00134177		396	808790		0.445537	806370		0.439281	796730		0.440571	0.440923	0.00330337		396	308870		0.180613	322180		0.180022	328040		0.184094	0.181135
399	1101360		0.496739	1073500		0.491657	1138520		0.517173	0.501856	0.0135059		399	1124080		0.531857	1115580		0.534441	1103380		0.531584	0.532627	0.00157644		399	804950		0.443422	805700		0.438916	791990		0.43795	0.440376	0.00292082		399	308760		0.180549	319960		0.178782	325680		0.182769	0.180844
402	1105450		0.498583	1074710		0.492211	1137830		0.51686	0.502551	0.0127943		402	1127050		0.533262	1111410		0.532443	1101070		0.530471	0.532059	0.00143492		402	815580		0.449278	809740		0.441117	793510		0.43879	0.445197	0.00550769		402	305430		0.178601	319590		0.178575	326450		0.183201	0.178588
[truncated: 1 more columns]

## Sheet: 1S3B
rXKR9 full-length/Sb1XKR9
volume [ml]	A280 [mAU]
0	-0.003
0.037	-0.008
0.075	-0.003		full raw gel		lane shown
0.112	-0.007
0.15	-0.003
0.187	-0.003
0.225	-0.007
0.262	-0.006
0.3	-0.003
0.337	-0.015
0.375	-0.007
0.412	-0.006
0.45	-0.005
0.487	-0.007
0.525	-0.007
0.562	-0.005
0.6	-0.004
0.637	-0.005
0.675	-0.008
0.712	-0.005
0.75	-0.006
0.787	-0.005
0.825	-0.004
0.862	-0.008
0.9	-0.008
0.937	-0.004
0.975	0
1.012	-0.004
1.05	-0.004
1.087	-0.004
1.125	-0.007
1.162	-0.006
1.2	-0.007
1.237	-0.009
1.275	-0.009
1.312	-0.008
1.35	-0.008
1.387	-0.011
1.425	-0.012
1.462	-0.017
1.499	-0.005
1.537	-0.012
1.574	-0.008
1.612	-0.009
1.649	-0.01
1.687	-0.007
1.724	-0.008
1.762	-0.004
1.799	-0.008
1.837	-0.006
1.874	-0.006
1.912	-0.011
1.949	-0.009
1.987	-0.016
2.024	-0.01
2.062	-0.007
2.099	-0.012
2.137	-0.013
2.174	-0.007
2.212	-0.007
2.249	-0.011
2.287	-0.004
2.324	-0.01
2.362	-0.01
2.399	-0.008
2.437	-0.011
2.474	-0.013
2.512	-0.011
2.549	0.001
2.587	-0.007
2.624	-0.009
2.662	-0.004
2.699	-0.004
2.737	-0.001
2.774	-0.006
2.812	-0.003
2.849	-0.004
2.887	-0.004
2.924	-0.007
2.962	-0.009
2.999	-0.01
3.036	-0.003
3.074	-0.005
3.111	-0.001
3.149	-0.01
3.186	-0.006
3.224	-0.007
3.261	-0.006
3.299	-0.007
3.336	-0.007
3.374	-0.011
3.411	-0.006
3.449	-0.008
3.486	-0.006
3.524	-0.002
3.561	-0.004
3.599	-0.009
3.636	-0.009
3.674	-0.011
3.711	-0.006
3.749	-0.007
3.786	-0.003
3.824	-0.006
3.861	-0.009
3.899	-0.006
3.936	-0.004
3.974	-0.003
4.011	-0.006
4.049	-0.005
4.086	-0.007
4.124	-0.008
4.161	-0.006
4.199	-0.008
4.236	-0.003
4.274	-0.001
4.311	-0.003
4.349	-0.005
4.386	-0.003
4.424	-0.004
4.461	-0.005
4.498	0.005
4.536	-0.002
4.573	0
4.611	-0.005
4.648	0
4.686	0.004
4.723	-0.005
4.761	-0.004
4.798	-0.004
4.836	-0.002
4.873	0.001
4.911	-0.006
4.948	-0.002
4.986	-0.005
5.023	-0.004
5.061	-0.006
5.098	-0.005
5.136	-0.003
5.173	-0.004
5.211	-0.003
5.248	-0.001
5.286	0.003
5.323	-0.004
5.361	-0.005
5.398	0
5.436	-0.005
5.473	-0.002
5.511	-0.001
5.548	-0.001
5.586	-0.005
5.623	-0.004
5.661	0
5.698	-0.002
5.736	0.005
5.773	-0.002
5.811	-0.004
5.848	0
5.886	0
5.923	-0.001
5.961	-0.003
5.998	-0.003
6.035	-0.003
6.073	-0.001
6.11	-0.004
6.148	0.005
6.185	-0.001
6.223	-0.003
6.26	-0.003
6.298	0.006
6.335	0.001
6.373	-0.003
6.41	0.005
6.448	0.001
6.485	0.003
6.523	0.005
6.56	0.006
6.598	0.009
6.635	0.004
6.673	0.003
6.71	0.004
6.748	0.006
6.785	0.009
6.823	0.009
6.86	0.014
6.898	0.009
6.935	0.01
6.973	0.012
7.01	0.013
7.048	0.024
7.085	0.033
7.123	0.046
7.16	0.057
7.198	0.081
7.235	0.103
7.273	0.124
7.31	0.158
7.348	0.188
7.385	0.222
7.423	0.254
7.46	0.276
7.497	0.318
7.535	0.347
7.572	0.386
7.61	0.422
7.647	0.463
7.685	0.525
7.722	0.588
7.76	0.672
7.797	0.801
7.835	1.02
7.872	1.317
7.91	1.793
7.947	2.423
7.985	3.329
8.022	4.37
8.06	5.677
8.097	7.025
8.135	8.514
8.172	9.744
8.21	10.815
8.247	11.579
8.285	12.162
8.322	12.472
8.36	12.572
8.397	12.49
8.435	12.195
8.472	11.836
8.51	11.371
8.547	10.873
8.585	10.351
8.622	9.908
8.66	9.459
8.697	9.083
8.735	8.714
8.772	8.435
8.81	8.188
8.847	7.986
8.885	7.816
8.922	7.673
8.96	7.552
8.997	7.444
9.034	7.346
9.072	7.265
9.109	7.199
9.147	7.133
9.184	7.09
9.222	7.055
9.259	7.031
9.297	7.018
9.334	7.011
9.372	7.021
9.409	7.041
9.447	7.063
9.484	7.086
9.522	7.119
9.559	7.16
9.597	7.208
9.634	7.252
9.672	7.304
9.709	7.361
9.747	7.423
9.784	7.482
9.822	7.547
9.859	7.613
9.897	7.687
9.934	7.76
9.972	7.839
10.009	7.914
10.047	8.006
10.084	8.089
10.122	8.186
10.159	8.263
10.197	8.374
10.234	8.48
10.272	8.586
10.309	8.684
10.347	8.817
10.384	8.933
10.422	9.057
10.459	9.187
10.496	9.326
10.534	9.462
10.571	9.619
10.609	9.762
10.646	9.947
10.684	10.117
10.721	10.316
10.759	10.519
10.796	10.772
10.834	11.055
10.871	11.392
10.909	11.74
10.946	12.213
10.984	12.706
11.021	13.297
11.059	13.939
11.096	14.733
11.134	15.566
11.171	16.518
11.209	17.476
11.246	18.6
11.284	19.695
11.321	20.887
11.359	22.006
11.396	23.29
11.434	24.486
11.471	25.727
11.509	26.868
11.546	28.168
11.584	29.427
11.621	30.819
11.659	32.271
11.696	34.095
11.734	36.041
11.771	38.414
11.809	40.986
11.846	44.335
11.884	47.923
11.921	52.307
11.959	56.844
11.996	62.55
12.033	68.399
12.071	74.89
12.108	81.091
12.146	88.256
12.183	95.044
12.221	101.99
12.258	108.337
12.296	114.891
12.333	120.36
12.371	125.32
12.408	129.158
12.446	132.443
12.483	134.541
12.521	135.789
12.558	135.868
12.596	134.968
12.633	133.177
12.671	130.448
12.708	127.291
12.746	122.944
12.783	118.366
12.821	113.126
12.858	107.844
12.896	101.802
12.933	96.081
12.971	90.197
13.008	84.859
13.046	78.916
13.083	73.704
13.121	68.387
13.158	63.62
13.196	58.718
13.233	54.408
13.271	50.269
13.308	46.819
13.346	43.192
13.383	40.085
13.421	37.052
13.458	34.503
13.495	31.863
13.533	29.688
13.57	27.626
13.608	25.867
13.645	24.049
13.683	22.571
13.72	21.123
13.758	19.847
13.795	18.569
13.833	17.488
13.87	16.472
13.908	15.645
13.945	14.755
13.983	14.006
14.02	13.281
14.058	12.685
14.095	12.064
14.133	11.528
14.17	11.043
14.208	10.642
14.245	10.22
14.283	9.877
14.32	9.535
14.358	9.252
14.395	8.968
14.433	8.731
14.47	8.522
14.508	8.341
14.545	8.172
14.583	8.028
14.62	7.909
14.658	7.81
14.695	7.731
14.733	7.675
14.77	7.646
14.808	7.627
14.845	7.643
14.883	7.674
14.92	7.733
14.958	7.799
14.995	7.895
15.032	7.993
15.07	8.12
15.107	8.238
15.145	8.378
15.182	8.511
15.22	8.649
15.257	8.781
15.295	8.92
15.332	9.035
15.37	9.161
15.407	9.256
15.445	9.361
15.482	9.453
15.52	9.532
15.557	9.614
15.595	9.687
15.632	9.753
15.67	9.825
15.707	9.883
15.745	9.952
15.782	10.022
15.82	10.11
15.857	10.2
15.895	10.313
15.932	10.447
15.97	10.622
16.007	10.814
16.045	11.08
16.082	11.381
16.12	11.777
16.157	12.217
16.195	12.793
16.232	13.401
16.27	14.157
16.307	14.971
16.345	15.975
16.382	17.005
16.42	18.214
16.457	19.427
16.494	20.839
16.532	22.222
16.569	23.762
16.607	25.241
16.644	27.028
16.682	28.701
16.719	30.593
16.757	32.488
16.794	34.704
16.832	36.878
16.869	39.465
16.907	42.211
16.944	45.632
16.982	49.174
17.019	53.388
17.057	57.739
17.094	62.934
17.132	68.109
17.169	73.918
17.207	79.461
17.244	85.803
17.282	91.529
17.319	97.337
17.357	102.307
17.394	107.025
17.432	110.572
17.469	113.562
17.507	115.513
17.544	116.59
17.582	116.63
17.619	115.727
17.657	114.108
17.694	111.566
17.732	108.494
17.769	104.73
17.807	100.802
17.844	95.997
17.882	91.389
17.919	86.239
17.957	81.503
17.994	76.373
18.031	71.748
18.069	66.847
18.106	62.349
18.144	57.61
18.181	53.554
18.219	49.267
18.256	45.594
18.294	41.813
18.331	38.52
18.369	35.209
18.406	32.311
18.444	29.296
18.481	26.74
18.519	24.185
18.556	21.995
18.594	19.812
18.631	18.008
18.669	16.168
18.706	14.519
18.744	13.045
18.781	11.636
18.819	10.489
18.856	9.387
18.894	8.421
18.931	7.487
18.969	6.73
19.006	6.013
19.044	5.382
19.081	4.797
19.119	4.347
19.156	3.969
19.194	3.649
19.231	3.369
19.269	3.15
19.306	2.951
19.344	2.79
19.381	2.649
19.419	2.538
19.456	2.445
19.493	2.362
19.531	2.284
19.568	2.235
19.606	2.18
19.643	2.145
19.681	2.118
19.718	2.11
19.756	2.119
19.793	2.153
19.831	2.209
19.868	2.278
19.906	2.371
19.943	2.478
19.981	2.599
20.018	2.699
20.056	2.807
20.093	2.899
20.131	2.981
20.168	3.036
20.206	3.059
20.243	3.066
20.281	3.049
20.318	2.997
20.356	2.928
20.393	2.841
20.431	2.728
20.468	2.622
20.506	2.495
20.543	2.362
20.581	2.231
20.618	2.105
20.656	1.986
20.693	1.874
20.731	1.771
20.768	1.682
20.806	1.611
20.843	1.545
20.881	1.493
20.918	1.445
20.956	1.399
20.993	1.345
21.03	1.285
21.068	1.225
21.105	1.163
21.143	1.095
21.18	1.027
21.218	0.97
21.255	0.91
21.293	0.854
21.33	0.792
21.368	0.737
21.405	0.68
21.443	0.635
21.48	0.589
21.518	0.544
21.555	0.498
21.593	0.464
21.63	0.436
21.668	0.406
21.705	0.382
21.743	0.358
21.78	0.347
21.818	0.339
21.855	0.331
21.893	0.323
21.93	0.324
21.968	0.335
22.005	0.342
22.043	0.353
22.08	0.366
22.118	0.383
22.155	0.395
22.193	0.413
22.23	0.433
22.268	0.452
22.305	0.464
22.343	0.47
22.38	0.482
22.418	0.486
22.455	0.483
22.492	0.476
22.53	0.473
22.567	0.457
22.605	0.446
22.642	0.427
22.68	0.407
22.717	0.389
22.755	0.367
22.792	0.349
22.83	0.329
22.867	0.311
22.905	0.294
22.942	0.27
22.98	0.258
23.017	0.235
23.055	0.228
23.092	0.217
23.13	0.208
23.167	0.198
23.205	0.19
23.242	0.181
23.28	0.177
23.317	0.174
23.355	0.164
23.392	0.16
23.43	0.165
23.467	0.158
23.505	0.154
23.542	0.149
23.58	0.155
23.617	0.145
23.655	0.148
23.692	0.142
23.73	0.144
23.767	0.147
23.805	0.147
23.842	0.144
23.88	0.146
23.917	0.151
23.955	0.151
23.992	0.159
24.029	0.169
24.067	0.18
24.104	0.169
24.142	0.172
24.179	0.173
24.217	0.175
24.254	0.174
24.292	0.175
24.329	0.177
24.367	0.178
24.404	0.175
24.442	0.18
24.479	0.171
24.517	0.172
24.554	0.161
24.592	0.161
24.629	0.158
24.667	0.154
24.704	0.148
24.742	0.145
24.779	0.142
24.817	0.142
24.854	0.133
24.892	0.14
24.929	0.142
24.967	0.14
25.004	0.144
25.042	0.145
25.079	0.14
25.117	0.145
25.154	0.143
25.192	0.151
25.229	0.157
25.267	0.151
25.304	0.159
25.342	0.158
25.379	0.159
25.417	0.155
25.454	0.161
25.491	0.16
25.529	0.161
25.566	0.159
25.604	0.157
25.641	0.16
25.679	0.158
25.716	0.158
25.754	0.154
25.791	0.161
25.829	0.163
25.866	0.154
25.904	0.155
25.941	0.151
25.979	0.151
26.016	0.148
26.054	0.152
26.091	0.147
26.129	0.147
26.166	0.158
26.204	0.157
26.241	0.163
26.279	0.169
26.316	0.168
26.354	0.176
26.391	0.179
26.429	0.19
26.466	0.198
26.504	0.203
26.541	0.215
26.579	0.228
26.616	0.242
26.654	0.253
26.691	0.258
26.729	0.273
26.766	0.281
26.804	0.295
26.841	0.297
26.879	0.298
26.916	0.299
26.954	0.301
26.991	0.291
27.028	0.292
27.066	0.289
27.103	0.283
27.141	0.273
27.178	0.266
27.216	0.249
27.253	0.238
27.291	0.227
27.328	0.209
27.366	0.199
27.403	0.191
27.441	0.176
27.478	0.166
27.516	0.152
27.553	0.145
27.591	0.13
27.628	0.123
27.666	0.116
27.703	0.11
27.741	0.097
27.778	0.092
27.816	0.089
27.853	0.084
27.891	0.087
27.928	0.076
27.966	0.072
28.003	0.068
28.041	0.07
28.078	0.059
28.116	0.064
28.153	0.058
28.191	0.056
28.228	0.053
28.266	0.048
28.303	0.043
28.341	0.047
28.378	0.05
28.416	0.047
28.453	0.041
28.49	0.041
28.528	0.04
28.565	0.039
28.603	0.044
28.64	0.039
28.678	0.041
28.715	0.041
28.753	0.038
28.79	0.041
28.828	0.041
28.865	0.039
28.903	0.034
28.94	0.033
28.978	0.034
29.015	0.038
29.053	0.039
29.09	0.033
29.128	0.031
29.165	0.029
29.203	0.031
29.24	0.033
29.278	0.031
29.315	0.028
29.353	0.028
29.39	0.031
29.428	0.032
29.465	0.03
29.503	0.026
29.54	0.032
29.578	0.027
29.615	0.027
29.653	0.023
29.69	0.024
29.728	0.031
29.765	0.026
29.803	0.029
29.84	0.023
29.878	0.028
29.915	0.025
29.953	0.029
29.99	0.023
30.027	0.02
30.065	0.027
30.102	0.025
30.14	0.029
30.177	0.025
30.215	0.026
30.252	0.026
30.29	0.027
30.327	0.023
30.365	0.026
30.402	0.022
30.44	0.025
30.477	0.018
30.515	0.02
30.552	0.022
30.59	0.022
30.627	0.024
30.665	0.022
30.702	0.018
30.74	0.019
30.777	0.02
30.815	0.02
30.852	0.023
30.89	0.017
30.927	0.018
30.965	0.021
31.002	0.019
31.04	0.022
31.077	0.017
31.115	0.019
31.152	0.017
31.19	0.019
31.227	0.022
31.265	0.022
31.302	0.021
31.34	0.021
31.377	0.021
31.415	0.026
31.452	0.018
31.489	0.025
31.527	0.024
31.564	0.027
31.602	0.029
31.639	0.025
31.677	0.029
31.714	0.029
31.752	0.027
31.789	0.03
31.827	0.028
31.864	0.031
31.902	0.026
31.939	0.032
31.977	0.029
32.014	0.038
32.052	0.034
32.089	0.033
32.127	0.033
32.164	0.035
32.202	0.031
32.239	0.03
32.277	0.03
32.314	0.033
32.352	0.028
32.389	0.032
32.427	0.029
32.464	0.023
32.502	0.024
32.539	0.018
32.577	0.023
32.614	0.015
32.652	0.021
32.689	0.017
32.727	0.014
32.764	0.014
32.802	0.013
32.839	0.014
32.877	0.015
32.914	0.011
32.952	0.02
32.989	0.016
33.026	0.011
33.064	0.012
33.101	0.008
33.139	0.011
33.176	0.011
33.214	0.012
33.251	0.009
33.289	0.012
33.326	0.007
33.364	0.006
33.401	0.008
33.439	0.011
33.476	0.014
33.514	0.016
33.551	0.012
33.589	0.012
33.626	0.01
33.664	0.011
33.701	0.012
33.739	0.015
33.776	0.007
33.814	0.015
33.851	0.01
33.889	0.01
33.926	0.007
33.964	0.014

[truncated: 4 more sheets: 1S3C, 1S3D, 2S1E, 2S2E]
