# Supplementary material for: Cryo-EM structures of the caspase-activated protein XKR9 involved in apoptotic lipid scrambling
Source: eLife journal article supplement (doi:10.7554/elife.69800), 2021-07-15

Figure 1 – figure supplement 3 – source data 1

Gel lane shown in Figure 1 –  
figure supplement 3B

\* rXKR9  
# Sb1<sup>XKR9</sup>

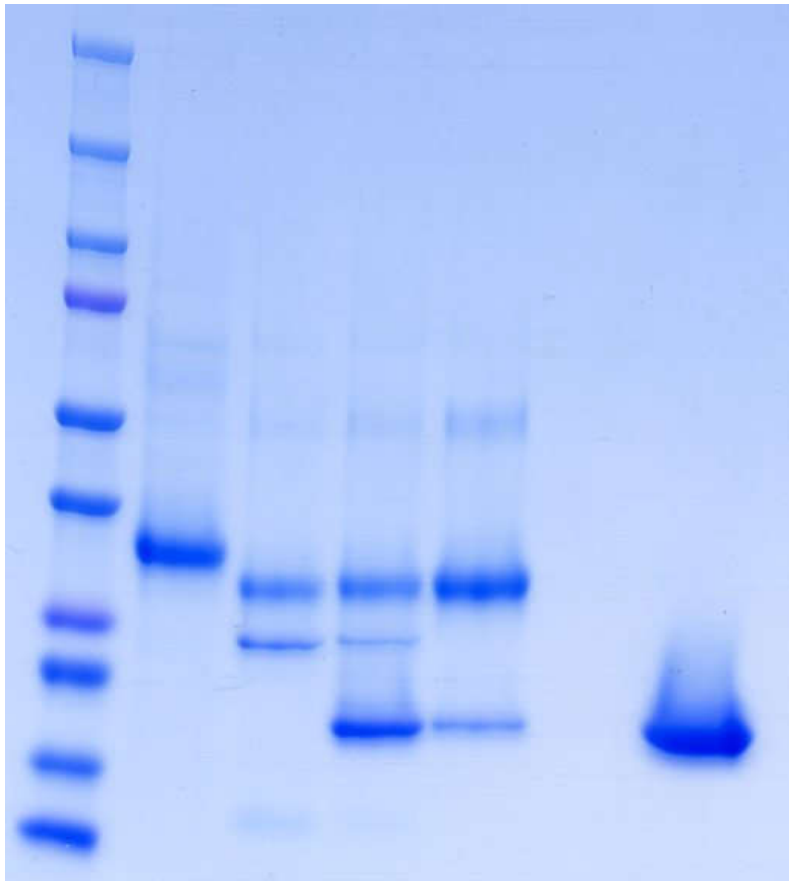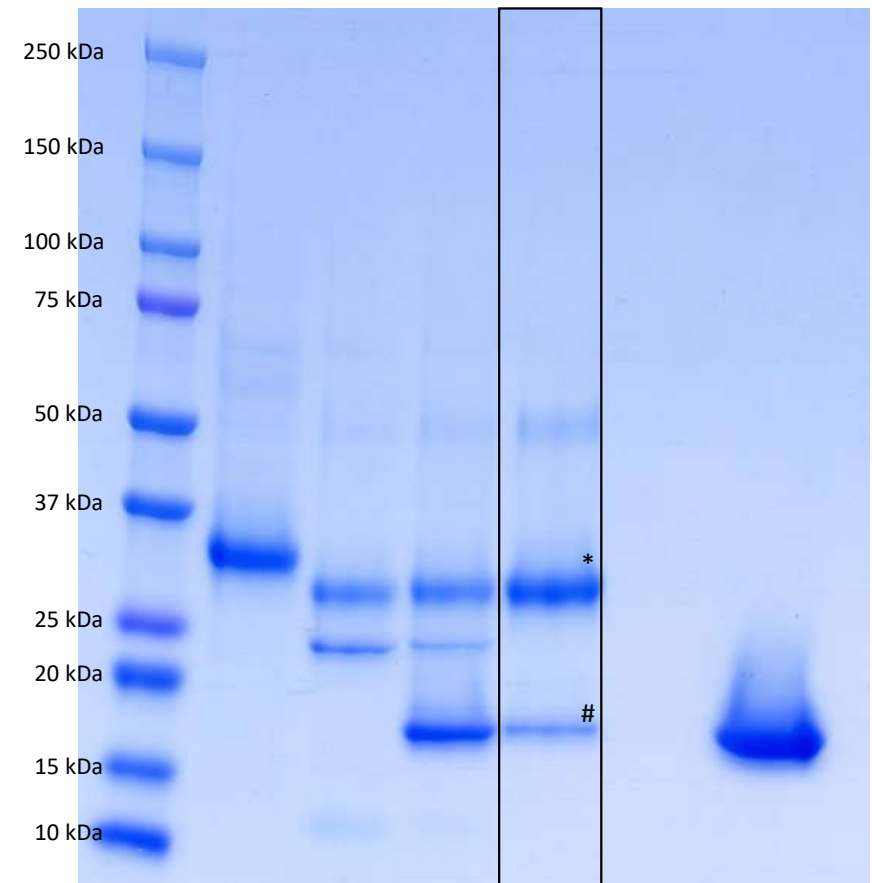

Supplement: supp [file elife-69800-supp-v1.zip]
