# Supplementary material for: Cryo-EM structures of the caspase-activated protein XKR9 involved in apoptotic lipid scrambling
Source: eLife journal article supplement (doi:10.7554/elife.69800), 2021-07-15
Supplement: supp [file Figure_1_figure_supplement_1_source_data_1.xlsx]

## Sheet: neg
neg
	Measurement 1			Measurement 2			Measurement 3			Average	Std.Dev
time [s]	F	Fmax	F/Fmax	F	Fmax	F/Fmax	F	Fmax	F/Fmax	F/Fmax
0	2255550	2217182	1.0173	2217200	2183432	1.01547	2222050	2201429	1.00937	1.01405	0.00415496
3	2247010		1.01345	2197030		1.00623	2232400		1.01407	1.01125	0.00436008
6	2250190		1.01489	2199670		1.00744	2205430		1.00182	1.00805	0.0065563
9	2242110		1.01124	2192840		1.00431	2216780		1.00697	1.00751	0.00349798
12	2235450		1.00824	2192470		1.00414	2208950		1.00342	1.00527	0.00260103
15	2227820		1.0048	2192510		1.00416	2210280		1.00402	1.00433	0.000414962
18	2222260		1.00229	2194370		1.00501	2209100		1.00348	1.00359	0.00136297
21	2217240		1.00003	2193480		1.0046	2211740		1.00468	1.0031	0.00266576
24	2218000		1.00037	2189300		1.00269	2196050		0.997557	1.0002	0.00256942
27	2220680		1.00158	2192890		1.00433	2192710		0.996039	1.00065	0.00422335
30	2210880		0.997158	2181690		0.999202	2199810		0.999265	0.998541	0.00119882
33	2212010		0.997667	2177470		0.997269	2196990		0.997984	0.99764	0.000357849
36	2202920		0.993568	2172770		0.995117	2192290		0.995849	0.994844	0.00116471
39	2203700		0.993919	2176290		0.996729	2193600		0.996444	0.995697	0.00154641
42	2207230		0.995511	2166340		0.992172	2192700		0.996035	0.994573	0.00209555
45	2204020		0.994064	2169610		0.99367	2190550		0.995058	0.994264	0.000715621
48	2195910		0.990406	2161270		0.98985	2185150		0.992605	0.990954	0.00145707
51	2185060		0.985512	2173320		0.995369	2184730		0.992414	0.991098	0.00505832
54	2183350		0.984741	2163300		0.99078	2189940		0.994781	0.990101	0.00505439
57	2202250		0.993265	2164820		0.991476	2197330		0.998138	0.994293	0.00344797
60	1966990		0.887158	1920280		0.879478	1959230		0.889981	0.885539	0.00543551
63	1694550		0.764281	1666750		0.763362	1678160		0.762305	0.763316	0.000988874
66	1544180		0.696461	1516440		0.694521	1516420		0.688834	0.693272	0.00396362
69	1448270		0.653203	1417050		0.649001	1425300		0.647443	0.649882	0.00297937
72	1368140		0.617063	1336710		0.612206	1349980		0.613229	0.614166	0.00256028
75	1310780		0.591192	1289080		0.590392	1307440		0.593905	0.59183	0.0018415
78	1284640		0.579402	1254740		0.574664	1265970		0.575067	0.576378	0.00262684
81	1251420		0.564419	1228170		0.562495	1242290		0.564311	0.563742	0.00108086
84	1238580		0.558628	1210130		0.554233	1224930		0.556425	0.556429	0.00219753
87	1227470		0.553617	1199870		0.549534	1219930		0.554154	0.552435	0.00252661
90	1215200		0.548083	1187570		0.543901	1210530		0.549884	0.547289	0.00306956
93	1210390		0.545914	1187240		0.543749	1204030		0.546931	0.545531	0.0016249
96	1201570		0.541936	1180590		0.540704	1206090		0.547867	0.543502	0.00382984
99	1198190		0.540411	1177650		0.539357	1195260		0.542947	0.540905	0.00184531
102	1199580		0.541038	1174600		0.53796	1197090		0.543779	0.540926	0.00291072
105	1196890		0.539825	1168750		0.535281	1195180		0.542911	0.539339	0.00383805
108	1189530		0.536505	1167940		0.53491	1194510		0.542607	0.538007	0.00406214
111	1189920		0.536681	1171800		0.536678	1193240		0.54203	0.538463	0.00308888
114	1191590		0.537434	1166760		0.53437	1195220		0.542929	0.538244	0.00433682
117	1187790		0.535721	1173870		0.537626	1190710		0.54088	0.538076	0.00260918
120	1185640		0.534751	1160090		0.531315	1188890		0.540054	0.535373	0.00440253
123	1189300		0.536402	1162780		0.532547	1194150		0.542443	0.537131	0.0049882
126	1177940		0.531278	1164840		0.53349	1193690		0.542234	0.535668	0.00579347
129	1176680		0.53071	1169010		0.5354	1195400		0.543011	0.536374	0.00620811
132	1177140		0.530917	1160450		0.53148	1187850		0.539581	0.533993	0.00484801
135	1178360		0.531467	1161060		0.531759	1185090		0.538328	0.533851	0.00387925
138	1179010		0.531761	1155030		0.528997	1182980		0.537369	0.532709	0.00426567
141	1173840		0.529429	1152930		0.528036	1191300		0.541148	0.532871	0.00720229
144	1176110		0.530453	1161240		0.531842	1187450		0.5394	0.533898	0.00481494
147	1173790		0.529406	1152970		0.528054	1183500		0.537605	0.531689	0.00516853
150	1172430		0.528793	1154260		0.528645	1181380		0.536642	0.53136	0.00457523
153	1176550		0.530651	1153060		0.528095	1182930		0.537346	0.532031	0.00477746
156	1173640		0.529339	1155360		0.529149	1181180		0.536551	0.53168	0.00422028
159	1172670		0.528901	1148170		0.525856	1181140		0.536533	0.53043	0.00550059
162	1172810		0.528964	1143500		0.523717	1183600		0.537651	0.530111	0.00703737
165	1163980		0.524982	1147910		0.525737	1181930		0.536892	0.529203	0.00666929
168	1166400		0.526073	1147990		0.525773	1181410		0.536656	0.529501	0.00619839
171	1175390		0.530128	1146910		0.525279	1178260		0.535225	0.530211	0.00497378
174	1164030		0.525004	1156030		0.529455	1187490		0.539418	0.531293	0.00738029
177	1166880		0.52629	1144190		0.524033	1178930		0.535529	0.528617	0.0060915
180	1168080		0.526831	1144680		0.524257	1180340		0.53617	0.529086	0.00626835
183	1166520		0.526127	1138270		0.521321	1180440		0.536215	0.527888	0.00760144
186	1161980		0.52408	1145140		0.524468	1179270		0.535684	0.528077	0.00659047
189	1166280		0.526019	1146220		0.524963	1177130		0.534712	0.528564	0.00534988
192	1160210		0.523281	1137950		0.521175	1175850		0.53413	0.526196	0.00695198
195	1157390		0.522009	1143900		0.5239	1175480		0.533962	0.526624	0.00642511
198	1154280		0.520607	1139600		0.521931	1183270		0.537501	0.526679	0.00939499
201	1154210		0.520575	1135770		0.520176	1178250		0.535221	0.525324	0.0085729
204	1160520		0.523421	1134990		0.519819	1179490		0.535784	0.526341	0.00837332
207	1157310		0.521973	1134320		0.519512	1173940		0.533263	0.524916	0.00733231
210	1161700		0.523953	1133040		0.518926	1169660		0.531319	0.524733	0.00623282
213	1156750		0.521721	1134630		0.519654	1177830		0.53503	0.525468	0.00834466
216	1149030		0.518239	1137950		0.521175	1169600		0.531291	0.523568	0.00684744
219	1151570		0.519385	1135230		0.519929	1169700		0.531337	0.52355	0.00674886
222	1145370		0.516588	1133750		0.519251	1174530		0.533531	0.523123	0.00911083
225	1145640		0.51671	1124700		0.515106	1163090		0.528334	0.52005	0.00721874
228	1149390		0.518401	1131870		0.51839	1172810		0.532749	0.52318	0.00828706
231	1152810		0.519944	1127950		0.516595	1168470		0.530778	0.522439	0.0074134
234	1148350		0.517932	1130200		0.517625	1172380		0.532554	0.522704	0.00853187
237	1153850		0.520413	1128800		0.516984	1176070		0.53423	0.523876	0.00912963
240	1157200		0.521924	1123180		0.51441	1164680		0.529056	0.521797	0.00732383
243	1145870		0.516814	1124660		0.515088	1167400		0.530292	0.520731	0.0083246
246	1145070		0.516453	1124350		0.514946	1170460		0.531682	0.521027	0.00925814
249	1145140		0.516484	1119310		0.512638	1168620		0.530846	0.519989	0.0095968
252	1146610		0.517147	1121950		0.513847	1169170		0.531096	0.520697	0.00915586
255	1135790		0.512267	1114740		0.510545	1165930		0.529624	0.517479	0.0105534
258	1138860		0.513652	1113020		0.509757	1163670		0.528598	0.517336	0.0099457
261	1139650		0.514008	1113180		0.50983	1160660		0.52723	0.517023	0.00908323
264	1140430		0.51436	1118880		0.512441	1163770		0.528643	0.518481	0.00885239
267	1137650		0.513106	1112660		0.509592	1161950		0.527816	0.516838	0.00966822
270	1141170		0.514694	1108700		0.507779	1164410		0.528934	0.517135	0.0107868
273	1137470		0.513025	1117130		0.511639	1160260		0.527049	0.517238	0.00852465
276	1135860		0.512299	1112400		0.509473	1160750		0.527271	0.516348	0.00956487
279	1136640		0.512651	1112490		0.509514	1164780		0.529102	0.517089	0.0105209
282	1134390		0.511636	1105300		0.506221	1162670		0.528143	0.515334	0.0114191
285	1132190		0.510644	1110730		0.508708	1156460		0.525322	0.514891	0.00908515
288	1132370		0.510725	1103780		0.505525	1163770		0.528643	0.514964	0.012128
291	1125510		0.507631	1109540		0.508163	1158230		0.526126	0.513974	0.0105281
294	1133370		0.511176	1106290		0.506675	1160970		0.527371	0.515074	0.0108848
297	1131890		0.510508	1102180		0.504792	1161820		0.527757	0.514353	0.0119553
300	1121590		0.505863	1105600		0.506359	1156080		0.52515	0.512457	0.010995
303	1133950		0.511437	1100380		0.503968	1156440		0.525313	0.513573	0.0108317
306	1132780		0.51091	1099660		0.503638	1158420		0.526213	0.513587	0.0115229
309	1128420		0.508943	1102610		0.504989	1156870		0.525509	0.513147	0.0108864
312	1128350		0.508912	1101260		0.504371	1161880		0.527784	0.513689	0.0124163
315	1123460		0.506706	1096490		0.502186	1152760		0.523642	0.510845	0.0113105
318	1125150		0.507468	1098410		0.503066	1153960		0.524187	0.511574	0.0111429
321	1125040		0.507419	1094270		0.50117	1150470		0.522601	0.510397	0.0110218
324	1127580		0.508564	1097490		0.502644	1158360		0.526185	0.512465	0.0122456
327	1120420		0.505335	1098590		0.503148	1150910		0.522801	0.510428	0.010771
330	1123190		0.506584	1091870		0.500071	1158620		0.526304	0.510986	0.0136592
333	1117610		0.504068	1098710		0.503203	1153160		0.523823	0.510365	0.0116635
336	1122020		0.506057	1093010		0.500593	1149490		0.522156	0.509602	0.0112104
339	1118430		0.504438	1090360		0.499379	1155410		0.524845	0.509554	0.0134822
342	1122710		0.506368	1094340		0.501202	1149080		0.52197	0.509847	0.0108123
345	1115260		0.503008	1095050		0.501527	1153710		0.524073	0.509536	0.0126113
348	1111310		0.501226	1090380		0.499388	1152290		0.523428	0.508014	0.0133805
351	1116510		0.503572	1093030		0.500602	1148910		0.521893	0.508689	0.0115311
354	1112670		0.50184	1090890		0.499622	1146660		0.520871	0.507444	0.0116806
357	1116930		0.503761	1091020		0.499681	1146680		0.52088	0.508107	0.0112478
360	1113110		0.502038	1084170		0.496544	1147930		0.521448	0.506677	0.0130838
363	1116610		0.503617	1082920		0.495971	1145420		0.520307	0.506632	0.012445
366	1108510		0.499963	1084260		0.496585	1147580		0.521289	0.505946	0.0133943
369	1114190		0.502525	1086670		0.497689	1150810		0.522756	0.507657	0.013298
372	1112450		0.50174	1086870		0.497781	1146150		0.520639	0.50672	0.0122158
375	1111020		0.501096	1078640		0.494011	1146000		0.520571	0.505226	0.0137532
378	1111150		0.501154	1086050		0.497405	1148250		0.521593	0.506717	0.0130183
381	1107210		0.499377	1080960		0.495074	1141720		0.518627	0.504359	0.012542
384	1103250		0.497591	1074330		0.492037	1145250		0.52023	0.503286	0.0149344
387	1106090		0.498872	1070720		0.490384	1138940		0.517364	0.502207	0.0137957
390	1104460		0.498137	1076690		0.493118	1141170		0.518377	0.503211	0.0133719
393	1103640		0.497767	1080870		0.495033	1137020		0.516492	0.503097	0.0116804
396	1111680		0.501393	1073710		0.491753	1137920		0.516901	0.503349	0.0126872
399	1101360		0.496739	1073500		0.491657	1138520		0.517173	0.501856	0.0135059
402	1105450		0.498583	1074710		0.492211	1137830		0.51686	0.502551	0.0127943

## Sheet: neg TCEP
neg/TCEP
	Measurement 1			Measurement 2			Measurement 3			Average	Std.Dev
time [s]	F	Fmax	F/Fmax	F	Fmax	F/Fmax	F	Fmax	F/Fmax	F/Fmax
0	2133270	2.1135e+06	1.00935	2106200	2.08738e+06	1.00902	2089530	2.07565e+06	1.00669	1.00835	0.0014514
3	2137480		1.01135	2101650		1.00684	2091320		1.00755	1.00858	0.00242375
6	2134350		1.00987	2098080		1.00513	2090530		1.00717	1.00739	0.00237676
9	2126650		1.00622	2098330		1.00525	2081860		1.00299	1.00482	0.00165589
12	2125050		1.00547	2098330		1.00525	2089220		1.00654	1.00575	0.000692029
15	2120020		1.00309	2093330		1.00285	2079710		1.00196	1.00263	0.000595011
18	2113430		0.999967	2089900		1.00121	2074170		0.999289	1.00015	0.000973295
21	2120080		1.00311	2089910		1.00121	2081060		1.00261	1.00231	0.000984501
24	2124010		1.00497	2093740		1.00305	2080020		1.00211	1.00338	0.00146092
27	2117700		1.00199	2082980		0.997893	2082280		1.0032	1.00103	0.00277935
30	2104990		0.995974	2086180		0.999426	2073810		0.999115	0.998172	0.00190973
33	2112750		0.999645	2082420		0.997625	2071510		0.998007	0.998426	0.00107347
36	2104200		0.9956	2085560		0.999129	2076650		1.00048	0.998404	0.00252113
39	2101050		0.99411	2083630		0.998204	2072810		0.998633	0.996982	0.00249721
42	2103030		0.995046	2083330		0.99806	2071430		0.997969	0.997025	0.00171429
45	2101390		0.99427	2081710		0.997284	2068260		0.996441	0.995999	0.00155498
48	2097090		0.992236	2075800		0.994453	2060090		0.992505	0.993065	0.00120988
51	2102770		0.994923	2069080		0.991234	2069540		0.997058	0.994405	0.00294653
54	2098130		0.992728	2074620		0.993888	2056090		0.990578	0.992398	0.00167933
57	2092550		0.990088	2072790		0.993011	2053040		0.989109	0.990736	0.00203032
60	1906600		0.902106	1855800		0.889058	1853200		0.89283	0.894665	0.00671461
63	1694310		0.801661	1598810		0.765942	1626120		0.783428	0.783677	0.017861
66	1528680		0.723293	1478550		0.708329	1482360		0.714168	0.715263	0.00754222
69	1425200		0.674332	1379590		0.66092	1380490		0.665089	0.66678	0.00686403
72	1352070		0.63973	1318550		0.631677	1311800		0.631996	0.634468	0.00456026
75	1304990		0.617455	1272780		0.60975	1283530		0.618376	0.615194	0.00473644
78	1275910		0.603695	1236470		0.592355	1238990		0.596918	0.597656	0.00570596
81	1249890		0.591384	1219080		0.584024	1209630		0.582773	0.58606	0.00465276
84	1233180		0.583478	1204590		0.577083	1207880		0.58193	0.58083	0.00333632
87	1220360		0.577412	1195090		0.572532	1190050		0.573339	0.574428	0.0026159
90	1214780		0.574772	1189220		0.569719	1177480		0.567283	0.570592	0.0038196
93	1206470		0.57084	1175700		0.563242	1176540		0.566831	0.566971	0.00380075
96	1204080		0.569709	1177510		0.564109	1172480		0.564875	0.566231	0.00303629
99	1190440		0.563255	1172250		0.56159	1172680		0.564971	0.563272	0.00169076
102	1195890		0.565834	1177020		0.563875	1163080		0.560346	0.563352	0.00278123
105	1194720		0.56528	1168720		0.559898	1166900		0.562186	0.562455	0.00270106
108	1190310		0.563194	1172110		0.561523	1163720		0.560654	0.56179	0.00129082
111	1192740		0.564344	1168040		0.559573	1169330		0.563357	0.562424	0.00251848
114	1190280		0.56318	1164580		0.557915	1164760		0.561155	0.56075	0.00265559
117	1181730		0.559134	1172750		0.561829	1157280		0.557552	0.559505	0.00216272
120	1181120		0.558846	1165420		0.558318	1161290		0.559484	0.558882	0.000583855
123	1192220		0.564098	1159960		0.555702	1159940		0.558833	0.559544	0.00424282
126	1171820		0.554445	1161340		0.556363	1159720		0.558727	0.556512	0.00214476
129	1184440		0.560417	1166060		0.558624	1154240		0.556087	0.558376	0.00217541
132	1178350		0.557535	1158010		0.554768	1155050		0.556477	0.55626	0.00139644
135	1183200		0.55983	1158640		0.555069	1161870		0.559763	0.558221	0.0027293
138	1182270		0.55939	1156550		0.554068	1161230		0.559455	0.557638	0.00309131
141	1178570		0.557639	1154080		0.552885	1156850		0.557344	0.555956	0.00266387
144	1175200		0.556045	1160600		0.556008	1158750		0.55826	0.556771	0.00128952
147	1180150		0.558387	1156280		0.553939	1151450		0.554743	0.555689	0.00237022
150	1169560		0.553376	1161400		0.556392	1154200		0.556068	0.555278	0.00165549
153	1172570		0.5548	1158530		0.555017	1156260		0.55706	0.555626	0.00124699
156	1174700		0.555808	1155720		0.553671	1153940		0.555942	0.55514	0.00127465
159	1174660		0.555789	1155590		0.553608	1152940		0.555461	0.554953	0.00117582
162	1172270		0.554658	1154560		0.553115	1152470		0.555234	0.554336	0.00109589
165	1171790		0.554431	1152580		0.552166	1152720		0.555355	0.553984	0.00164056
168	1170320		0.553736	1146360		0.549186	1151210		0.554627	0.552516	0.00291809
171	1172660		0.554843	1153720		0.552712	1150470		0.554271	0.553942	0.00110258
174	1164270		0.550873	1156400		0.553996	1153180		0.555576	0.553482	0.00239343
177	1172750		0.554885	1149980		0.550921	1142620		0.550489	0.552098	0.00242336
180	1162900		0.550225	1147650		0.549804	1146990		0.552594	0.550874	0.001504
183	1161160		0.549402	1145620		0.548832	1147420		0.552801	0.550345	0.00214622
186	1163830		0.550665	1153920		0.552808	1145180		0.551722	0.551732	0.00107169
189	1165880		0.551635	1147990		0.549967	1149340		0.553726	0.551776	0.00188345
192	1161290		0.549463	1152250		0.552008	1141270		0.549838	0.550437	0.00137395
195	1161040		0.549345	1150900		0.551361	1146200		0.552213	0.550973	0.00147321
198	1166170		0.551772	1149980		0.550921	1140590		0.549511	0.550734	0.00114212
201	1162750		0.550154	1143860		0.547989	1142260		0.550315	0.549486	0.00129913
204	1170470		0.553807	1145350		0.548703	1140270		0.549357	0.550622	0.00277734
207	1161670		0.549643	1141330		0.546777	1141480		0.54994	0.548786	0.00174671
210	1160430		0.549056	1146010		0.549019	1141860		0.550123	0.549399	0.000626754
213	1162010		0.549804	1150950		0.551385	1136500		0.54754	0.549576	0.00193262
216	1158650		0.548214	1139600		0.545948	1140170		0.549308	0.547823	0.00171392
219	1163180		0.550357	1147290		0.549632	1145030		0.55165	0.550546	0.00102211
222	1154170		0.546094	1150170		0.551012	1135450		0.547034	0.548047	0.00261036
225	1162180		0.549884	1141840		0.547021	1136010		0.547304	0.54807	0.00157767
228	1158380		0.548086	1143220		0.547682	1145520		0.551886	0.549218	0.00231918
231	1159850		0.548782	1135940		0.544195	1145010		0.55164	0.548205	0.00375612
234	1159820		0.548768	1140110		0.546192	1140340		0.54939	0.548117	0.00169544
237	1154340		0.546175	1147510		0.549737	1134750		0.546697	0.547536	0.00192391
240	1154420		0.546213	1149890		0.550878	1140320		0.549381	0.548824	0.00238186
243	1150690		0.544448	1136900		0.544654	1135530		0.547073	0.545392	0.00145965
246	1153330		0.545697	1131260		0.541953	1134850		0.546745	0.544798	0.0025196
249	1160530		0.549104	1142210		0.547198	1139240		0.54886	0.548387	0.00103692
252	1152840		0.545465	1141990		0.547093	1132910		0.545811	0.546123	0.00085769
255	1145780		0.542125	1141530		0.546873	1134320		0.54649	0.545162	0.00263775
258	1148490		0.543407	1134750		0.543624	1131620		0.545189	0.544073	0.000972332
261	1154680		0.546336	1137740		0.545057	1134780		0.546712	0.546035	0.000867427
264	1144730		0.541628	1142000		0.547098	1132780		0.545748	0.544825	0.00284952
267	1146340		0.54239	1127680		0.540237	1127590		0.543248	0.541958	0.00155075
270	1150500		0.544358	1130150		0.541421	1122190		0.540646	0.542142	0.00195807
273	1147630		0.543	1137010		0.544707	1130900		0.544842	0.544183	0.00102692
276	1145180		0.541841	1137610		0.544995	1119310		0.539258	0.542031	0.0028728
279	1150080		0.544159	1139190		0.545752	1128180		0.543532	0.544481	0.00114427
282	1148350		0.543341	1132350		0.542475	1127060		0.542992	0.542936	0.000435685
285	1150650		0.544429	1130660		0.541665	1123470		0.541263	0.542452	0.00172358
288	1145340		0.541916	1134840		0.543668	1125200		0.542096	0.54256	0.000963355
291	1140460		0.539607	1130490		0.541584	1123290		0.541176	0.540789	0.00104339
294	1141610		0.540152	1133320		0.542939	1118600		0.538916	0.540669	0.00206082
297	1137510		0.538212	1133360		0.542959	1127150		0.543036	0.541402	0.00276316
300	1141760		0.540223	1125870		0.53937	1125870		0.542419	0.540671	0.00157294
303	1142560		0.540601	1125040		0.538973	1124150		0.54159	0.540388	0.00132174
306	1136040		0.537516	1129610		0.541162	1132050		0.545396	0.541358	0.00394378
309	1141650		0.54017	1129110		0.540923	1120170		0.539673	0.540255	0.000629142
312	1133810		0.536461	1129670		0.541191	1117510		0.538391	0.538681	0.00237818
315	1142740		0.540686	1129400		0.541061	1119240		0.539225	0.540324	0.000970387
318	1137070		0.538003	1123560		0.538264	1121330		0.540232	0.538833	0.00121832
321	1138880		0.53886	1129320		0.541023	1118130		0.53869	0.539524	0.00130077
324	1136970		0.537956	1130530		0.541603	1110820		0.535168	0.538242	0.00322683
327	1139360		0.539087	1123060		0.538024	1117790		0.538526	0.538546	0.000531681
330	1135580		0.537298	1129740		0.541224	1119900		0.539543	0.539355	0.00196964
333	1134520		0.536797	1127460		0.540132	1116580		0.537943	0.538291	0.0016945
336	1134250		0.536669	1129920		0.541311	1123550		0.541301	0.53976	0.00267702
339	1137540		0.538226	1125690		0.539284	1116310		0.537813	0.538441	0.000758708
342	1138480		0.538671	1123460		0.538216	1116760		0.53803	0.538305	0.000329591
345	1124940		0.532264	1129700		0.541205	1113230		0.536329	0.5366	0.00447663
348	1130350		0.534824	1124210		0.538575	1117470		0.538372	0.537257	0.00210958
351	1123480		0.531573	1118700		0.535935	1119520		0.53936	0.535623	0.00390256
354	1129080		0.534223	1123250		0.538115	1116180		0.537751	0.536696	0.00214963
357	1132340		0.535765	1122820		0.537909	1116590		0.537948	0.537208	0.00124905
360	1128490		0.533944	1123700		0.538331	1119270		0.539239	0.537171	0.00283171
363	1126660		0.533078	1122960		0.537976	1112530		0.535992	0.535682	0.0024638
366	1125810		0.532676	1120350		0.536726	1109720		0.534638	0.53468	0.00202536
369	1126800		0.533144	1121030		0.537052	1113720		0.536565	0.535587	0.0021295
372	1129470		0.534408	1120740		0.536913	1108350		0.533978	0.535099	0.0015849
375	1124140		0.531886	1113000		0.533205	1111240		0.535371	0.533487	0.00175952
378	1128010		0.533717	1121360		0.53721	1113070		0.536252	0.535726	0.00180493
381	1123210		0.531446	1118830		0.535998	1113410		0.536416	0.53462	0.00275685
384	1123480		0.531573	1114860		0.534096	1110670		0.535096	0.533588	0.00181528
387	1122860		0.53128	1113710		0.533545	1102980		0.531391	0.532072	0.00127675
390	1124150		0.53189	1118470		0.535825	1107110		0.533381	0.533699	0.0019866
393	1124970		0.532278	1115150		0.534235	1107150		0.5334	0.533304	0.00098168
396	1126930		0.533206	1115420		0.534364	1112300		0.535881	0.534484	0.00134177
399	1124080		0.531857	1115580		0.534441	1103380		0.531584	0.532627	0.00157644
402	1127050		0.533262	1111410		0.532443	1101070		0.530471	0.532059	0.00143492

## Sheet: mTMEM16F no Ca2+
TMEM16F no Ca2+
	Measurement 1			Measurement 2			Measurement 3			Average	Std.Dev
time [s]	F	Fmax	F/Fmax	F	Fmax	F/Fmax	F	Fmax	F/Fmax	F/Fmax
0	1802480	1815313	0.992931	1816340	1835658	0.989476	1798830	1.8084e+06	0.994706	0.991182	0.00265923
3	1801640		0.992468	1836830		1.00064	1792380		0.991139	0.99673	0.00514402
6	1807130		0.995492	1836370		1.00039	1803130		0.997083	0.996596	0.00249729
9	1808950		0.996495	1830920		0.997419	1797390		0.993909	0.996313	0.00181918
12	1811920		0.998131	1833470		0.998808	1799410		0.995026	0.997038	0.00201656
15	1815190		0.999932	1839850		1.00228	1797870		0.994175	1.00079	0.004172
18	1817060		1.00096	1830410		0.997141	1808670		1.00015	0.999808	0.00201254
21	1817680		1.0013	1828680		0.996199	1810790		1.00132	0.997311	0.00295193
24	1822170		1.00378	1836600		1.00051	1798330		0.994429	1.00119	0.00474448
27	1818290		1.00164	1834170		0.999189	1807120		0.99929	0.999907	0.00138677
30	1816790		1.00081	1835550		0.999941	1806400		0.998892	1.00213	0.000962394
33	1818350		1.00167	1832130		0.998078	1818590		1.00563	1.00067	0.00377858
36	1822380		1.00389	1834500		0.999369	1812500		1.00226	1.00179	0.00229131
39	1814760		0.999695	1836340		1.00037	1812210		1.0021	1.00121	0.00124251
42	1820440		1.00282	1830370		0.997119	1814830		1.00355	1.00014	0.00352308
45	1825360		1.00553	1839480		1.00208	1809290		1.00049	1.00608	0.00257898
48	1821590		1.00346	1847070		1.00622	1827630		1.01063	1.00343	0.00361839
51	1813060		0.998759	1840760		1.00278	1809530		1.00062	1.00213	0.00201203
54	1814540		0.999574	1839560		1.00213	1817160		1.00484	1.00382	0.00263412
57	1816480		1.00064	1853760		1.00986	1826030		1.00975	0.98403	0.00528942
60	1804370		0.993972	1689940		0.920618	1702770		0.941587	0.915878	0.0377815
63	1574750		0.867481	1501070		0.817729	1506480		0.833044	0.815618	0.0254815
66	1448510		0.79794	1378120		0.75075	1377360		0.761644	0.751006	0.024708
69	1331980		0.733747	1279550		0.697053	1273710		0.704328	0.696128	0.0194288
72	1247820		0.687386	1194440		0.650688	1189180		0.657585	0.653233	0.0195038
75	1175560		0.64758	1143100		0.622719	1124150		0.621625	0.621993	0.0146792
78	1112760		0.612985	1081970		0.589418	1077230		0.59568	0.589573	0.0122072
81	1067250		0.587915	1035960		0.564353	1024130		0.566317	0.567625	0.0130735
84	1027010		0.565748	1006330		0.548212	995720		0.550607	0.549142	0.00950881
87	1001520		0.551707	969650		0.52823	964720		0.533465	0.532717	0.0123241
90	968190		0.533346	951510		0.518348	937140		0.518214	0.519487	0.00869809
93	942560		0.519227	927730		0.505394	916440		0.506767	0.508505	0.00762133
96	928920		0.511713	915480		0.49872	905820		0.500895	0.500928	0.00695933
99	917660		0.505511	901430		0.491066	890370		0.492351	0.494647	0.00799435
102	898120		0.494747	892780		0.486354	881350		0.487363	0.48772	0.00458193
105	888910		0.489673	879130		0.478918	871760		0.48206	0.483003	0.00553017
108	880170		0.484859	870280		0.474097	868790		0.480418	0.478337	0.00540806
111	870670		0.479625	869330		0.47358	860900		0.476055	0.474612	0.00303936
114	866810		0.477499	860390		0.468709	851090		0.47063	0.472469	0.00462106
117	867860		0.478077	854490		0.465495	852120		0.4712	0.471086	0.00630017
120	858010		0.472651	855310		0.465942	849380		0.469685	0.468244	0.00336216
123	859810		0.473643	855750		0.466182	842970		0.46614	0.468115	0.00431975
126	853890		0.470382	852150		0.46422	840040		0.46452	0.465733	0.00347396
129	846990		0.466581	845070		0.460364	836560		0.462596	0.463895	0.0031495
132	850280		0.468393	848010		0.461965	840440		0.464741	0.465153	0.00322389
135	845370		0.465688	845110		0.460385	841090		0.465101	0.463258	0.0029069
138	848310		0.467308	844070		0.459819	838560		0.463702	0.462879	0.00374539
141	846880		0.46652	843270		0.459383	834600		0.461512	0.462112	0.0036641
144	845700		0.46587	847670		0.46178	832650		0.460433	0.462711	0.00283133
147	846770		0.46646	848400		0.462178	832740		0.460483	0.463066	0.00308007
150	843330		0.464565	841950		0.458664	832880		0.460561	0.461554	0.00301237
153	848260		0.46728	836610		0.455755	834460		0.461434	0.461864	0.00576293
156	838540		0.461926	838920		0.457013	836490		0.462557	0.45959	0.00303492
159	842030		0.463848	839280		0.457209	831560		0.459831	0.459599	0.0033439
162	841290		0.463441	846210		0.460985	827780		0.457741	0.461813	0.00285917
165	842360		0.46403	841910		0.458642	833700		0.461014	0.460574	0.00270045
168	840010		0.462736	841970		0.458675	830150		0.459051	0.459562	0.00224382
171	844650		0.465292	840380		0.457809	826940		0.457276	0.461077	0.00448201
174	835800		0.460416	843340		0.459421	832100		0.460129	0.459558	0.000512323
177	836360		0.460725	843110		0.459296	829760		0.458835	0.460021	0.000985299
180	834300		0.45959	836990		0.455962	831940		0.460041	0.459001	0.00223631
183	837340		0.461265	837060		0.456	834490		0.461451	0.45757	0.00309479
186	842160		0.46392	832960		0.453766	823630		0.455446	0.45843	0.00544256
189	839750		0.462592	834550		0.454633	827530		0.457602	0.458611	0.0040224
192	835710		0.460367	836140		0.455499	829350		0.458609	0.457812	0.00246513
195	839640		0.462532	833890		0.454273	827470		0.457569	0.457763	0.0041573
198	837840		0.46154	829530		0.451898	825510		0.456485	0.457096	0.00482306
201	838240		0.461761	838760		0.456926	827980		0.457851	0.458429	0.0025662
204	834840		0.459888	832070		0.453282	825720		0.456601	0.456515	0.00330303
207	833190		0.458979	829830		0.452061	825310		0.456375	0.454808	0.0034937
210	833740		0.459282	835400		0.455096	819900		0.453383	0.456755	0.0030345
213	834890		0.459915	831210		0.452813	824430		0.455888	0.456386	0.00356166
216	839280		0.462333	832800		0.453679	825410		0.45643	0.456382	0.00442179
219	833600		0.459205	833800		0.454224	819450		0.453134	0.455657	0.0032363
222	831540		0.45807	826270		0.450122	820190		0.453543	0.454621	0.00398668
225	834180		0.459524	834160		0.45442	824040		0.455672	0.45613	0.00265999
228	825920		0.454974	827040		0.450541	821820		0.454445	0.45346	0.00242083
231	831090		0.457822	826070		0.450013	822580		0.454865	0.454408	0.00394257
234	828200		0.45623	835160		0.454965	823530		0.45539	0.454957	0.000643664
237	833180		0.458973	835530		0.455166	820430		0.453676	0.456875	0.00273163
240	831090		0.457822	829940		0.452121	825510		0.456485	0.454975	0.00298128
243	832240		0.458455	828870		0.451538	822790		0.454981	0.454505	0.00345852
246	828360		0.456318	830760		0.452568	820150		0.453521	0.45404	0.00194906
249	827920		0.456076	829460		0.45186	819630		0.453234	0.454103	0.00215009
252	830310		0.457392	826240		0.450106	821690		0.454373	0.45328	0.00366105
255	828920		0.456626	824690		0.449261	818020		0.452343	0.453977	0.0036989
258	829070		0.456709	827920		0.451021	824710		0.456043	0.453232	0.0031097
261	828430		0.456357	828760		0.451478	817340		0.451967	0.453349	0.00268637
264	827390		0.455784	824750		0.449294	817780		0.452211	0.452557	0.00325039
267	824610		0.454252	825760		0.449844	818470		0.452592	0.451898	0.00222633
270	833850		0.459342	831750		0.453107	816670		0.451597	0.455036	0.00410581
273	826490		0.455288	826440		0.450215	818590		0.452659	0.451755	0.00253721
276	830760		0.45764	823430		0.448575	813350		0.449761	0.452073	0.00492721
279	825560		0.454776	820730		0.447104	813790		0.450004	0.451677	0.00387362
282	824870		0.454395	825030		0.449446	819480		0.453151	0.452196	0.00257436
285	827850		0.456037	826650		0.450329	818750		0.452747	0.452387	0.00286511
288	832040		0.458345	826260		0.450117	815220		0.450795	0.453786	0.00456754
291	828070		0.456158	831170		0.452791	819020		0.452896	0.452091	0.00191427
294	829740		0.457078	826560		0.45028	808940		0.447322	0.452091	0.00500228
297	824960		0.454445	824870		0.449359	811820		0.448915	0.451631	0.00307254
300	822220		0.452936	819980		0.446695	815750		0.451088	0.450161	0.00320548
303	828730		0.456522	821740		0.447654	815320		0.45085	0.451025	0.00449102
306	824900		0.454412	818720		0.446009	811790		0.448898	0.450077	0.00426923
309	827640		0.455921	818010		0.445622	813440		0.449811	0.450393	0.00517938
312	825060		0.4545	819290		0.44632	813120		0.449634	0.450081	0.00411476
315	821080		0.452308	823390		0.448553	812740		0.449424	0.449262	0.0019652
318	823960		0.453894	825500		0.449703	808220		0.446924	0.451132	0.00350872
321	825020		0.454478	820370		0.446908	813420		0.4498	0.449931	0.00382008
324	825250		0.454605	817210		0.445186	810900		0.448406	0.448953	0.00478705
327	824620		0.454258	819620		0.446499	808480		0.447068	0.449443	0.0043245
330	818230		0.450738	823000		0.448341	809390		0.447571	0.448953	0.00165145
333	822220		0.452936	818750		0.446025	809770		0.447781	0.448186	0.00359171
336	826450		0.455266	813880		0.443372	805820		0.445597	0.448128	0.00632307
339	826380		0.455227	815480		0.444244	806090		0.445747	0.448778	0.00595505
342	815510		0.449239	819980		0.446695	808110		0.446864	0.446722	0.00142269
345	818170		0.450705	818530		0.445906	803350		0.444231	0.448269	0.00336001
348	821220		0.452385	814360		0.443634	810520		0.448196	0.446249	0.00437681
351	818490		0.450881	816440		0.444767	800630		0.442727	0.446265	0.00424309
354	817590		0.450385	816060		0.44456	801390		0.443148	0.447461	0.00383647
357	816780		0.449939	809520		0.440997	809150		0.447439	0.4443	0.00461336
360	825130		0.454539	814540		0.443732	799250		0.441964	0.446503	0.00680723
363	816120		0.449575	810640		0.441607	797940		0.44124	0.444873	0.00471004
366	818830		0.451068	814860		0.443906	801910		0.443435	0.44687	0.00427748
369	815120		0.449024	807050		0.439652	805890		0.445636	0.444144	0.00474597
372	817890		0.45055	813260		0.443035	802490		0.443756	0.445826	0.00414677
375	816910		0.450011	812950		0.442866	802740		0.443894	0.444755	0.00386259
378	818530		0.450903	805460		0.438785	798210		0.441389	0.444334	0.0063787
381	815350		0.449151	809140		0.44079	801690		0.443313	0.444083	0.00428861
384	811920		0.447262	807310		0.439793	799870		0.442307	0.443987	0.00380013
387	812880		0.447791	807510		0.439902	804570		0.444906	0.444117	0.00399133
390	813110		0.447917	805940		0.439047	804120		0.444657	0.443059	0.00448675
393	809670		0.446022	810050		0.441286	799700		0.442213	0.442626	0.00251008
396	808790		0.445537	806370		0.439281	796730		0.440571	0.440923	0.00330337
399	804950		0.443422	805700		0.438916	791990		0.43795	0.440376	0.00292082
402	815580		0.449278	809740		0.441117	793510		0.43879	0.445197	0.00550769

## Sheet: mTMEM16F 100uM Ca2+
TMEM16F 100 μM Ca2+
	Measurement 1			Measurement 2			Measurement 3			Average	Std.Dev
time [s]	F	Fmax	F/Fmax	F	Fmax	F/Fmax	F	Fmax	F/Fmax	F/Fmax
0	1709640	1710122	0.999718	1785570	1789669	0.99771	1781080	1.78192e+06	0.999529	0.999466	0.00110903
3	1681290		0.98314	1800480		1.00604	1783650		1.00097	0.99651	0.0120282
6	1713870		1.00219	1801000		1.00633	1782540		1.00035	1.00325	0.00306412
9	1703180		0.995941	1780390		0.994815	1784080		1.00121	0.99696	0.00341523
12	1709530		0.999654	1800510		1.00606	1782140		1.00012	1.00155	0.00356928
15	1706570		0.997923	1788480		0.999336	1780020		0.998934	0.999296	0.000727918
18	1706070		0.997631	1787820		0.998967	1783040		1.00063	0.998883	0.00150206
21	1705790		0.997467	1794180		1.00252	1782010		1.00005	0.999659	0.00252708
24	1710990		1.00051	1789060		0.99966	1780120		0.99899	0.999732	0.000760459
27	1702630		0.995619	1796520		1.00383	1780190		0.999029	0.998718	0.00412405
30	1708820		0.999239	1795480		1.00325	1776050		0.996706	1.00143	0.00329807
33	1711730		1.00094	1783880		0.996765	1785120		1.0018	1.00029	0.0026917
36	1707230		0.998309	1788830		0.999531	1787550		1.00316	0.998229	0.00252296
39	1719280		1.00536	1785790		0.997833	1776300		0.996846	1.00131	0.00465406
42	1714290		1.00244	1782380		0.995927	1783240		1.00074	0.999277	0.00337717
45	1708610		0.999116	1785480		0.997659	1780970		0.999467	0.998181	0.000958556
48	1710770		1.00038	1780510		0.994882	1777940		0.997767	0.998783	0.00274944
51	1719880		1.00571	1787390		0.998727	1783860		1.00109	1.00065	0.0035499
54	1718690		1.00501	1785620		0.997738	1777480		0.997509	1.00262	0.00426648
57	1733580		1.01372	1794010		1.00243	1791010		1.0051	0.987606	0.00590041
60	1658590		0.969866	1586590		0.886527	1686900		0.946676	0.886004	0.0430138
63	1359570		0.795013	1412680		0.789353	1428420		0.801619	0.765712	0.00613908
66	1218710		0.712645	1257930		0.702884	1270100		0.712771	0.686696	0.00567207
69	1082020		0.632715	1131870		0.632447	1148550		0.644558	0.618271	0.00691618
72	980440		0.573316	1032050		0.576671	1050710		0.589651	0.563711	0.00862707
75	896670		0.524331	944420		0.527707	964280		0.541147	0.516899	0.00889574
78	824070		0.481878	874220		0.488481	888570		0.498659	0.478926	0.00845369
81	766850		0.448418	814210		0.45495	831120		0.466418	0.446576	0.00911216
84	713840		0.417421	761720		0.425621	777560		0.436361	0.41708	0.00949854
87	673420		0.393785	714560		0.399269	727380		0.4082	0.395033	0.00727608
90	635150		0.371406	679260		0.379545	698590		0.392044	0.373089	0.0103951
93	606190		0.354472	644650		0.360206	656310		0.368316	0.356191	0.00695614
96	581590		0.340087	615650		0.344002	630610		0.353894	0.341381	0.0071157
99	549150		0.321117	594340		0.332095	605950		0.340055	0.326564	0.00950859
102	530620		0.310282	575060		0.321322	581760		0.326479	0.316071	0.00827484
105	513280		0.300142	554290		0.309716	564170		0.316608	0.304871	0.00826919
108	499230		0.291927	539060		0.301207	543050		0.304756	0.296415	0.00662445
111	483830		0.282921	521570		0.291434	527650		0.296113	0.288153	0.00668813
114	473490		0.276875	507980		0.28384	516940		0.290103	0.2821	0.00661706
117	461490		0.269858	495990		0.277141	508890		0.285585	0.274683	0.00787083
120	457040		0.267256	482570		0.269642	493680		0.27705	0.269928	0.00510691
123	444950		0.260186	479710		0.268044	486260		0.272886	0.265465	0.00640912
126	435930		0.254912	465340		0.260015	477850		0.268166	0.259484	0.00668529
129	439380		0.256929	463810		0.25916	469580		0.263525	0.258347	0.00335496
132	429420		0.251105	458610		0.256254	461430		0.258951	0.253592	0.00398645
135	421010		0.246187	449960		0.251421	451570		0.253418	0.250164	0.0037341
138	417230		0.243977	442580		0.247297	450620		0.252885	0.246824	0.00450175
141	410530		0.240059	436940		0.244146	444050		0.249198	0.244069	0.00457782
144	405870		0.237334	432270		0.241536	441920		0.248002	0.240581	0.00537402
147	408400		0.238813	432890		0.241883	432780		0.242873	0.240251	0.00211665
150	398750		0.23317	421650		0.235602	427760		0.240056	0.235593	0.00349174
153	392650		0.229604	423100		0.236412	424110		0.238007	0.234575	0.00446338
156	393160		0.229902	416320		0.232624	423580		0.23771	0.232086	0.00396329
159	390750		0.228492	417510		0.233289	416490		0.233731	0.231768	0.00290531
162	386200		0.225832	411440		0.229897	416120		0.233523	0.229042	0.0038479
165	384990		0.225124	408010		0.227981	412330		0.231397	0.227608	0.00314028
168	379290		0.221791	406240		0.226992	409340		0.229719	0.225277	0.0040275
171	381820		0.223271	403000		0.225181	404580		0.227047	0.224695	0.00188838
174	375930		0.219826	399180		0.223047	402060		0.225633	0.22263	0.0029091
177	376480		0.220148	396500		0.221549	400960		0.225016	0.22172	0.00250582
180	369510		0.216072	393600		0.219929	398190		0.223461	0.219097	0.00369567
183	373150		0.218201	390720		0.21832	394320		0.221289	0.219223	0.00174992
186	369010		0.21578	388660		0.217169	394070		0.221149	0.21712	0.00278692
189	363270		0.212423	390030		0.217934	389190		0.218411	0.216149	0.00332767
192	365820		0.213915	389080		0.217403	388620		0.218091	0.216202	0.00223919
195	367980		0.215178	386130		0.215755	387190		0.217288	0.216117	0.00109074
198	364130		0.212926	384110		0.214626	387420		0.217417	0.214133	0.00226743
201	361760		0.21154	377020		0.210665	382840		0.214847	0.211797	0.00220574
204	359370		0.210143	379390		0.211989	379880		0.213186	0.212394	0.00153296
207	356600		0.208523	373640		0.208776	383200		0.215049	0.209486	0.00369686
210	352000		0.205833	374770		0.209407	376270		0.21116	0.209023	0.00271475
213	354080		0.20705	369580		0.206507	377460		0.211828	0.208278	0.00292776
216	353800		0.206886	372700		0.208251	376480		0.211278	0.207619	0.00224778
219	351820		0.205728	372410		0.208089	370140		0.20772	0.207622	0.00126994
222	350710		0.205079	367760		0.205491	372510		0.20905	0.205969	0.00218351
225	348120		0.203564	367040		0.205088	369460		0.207338	0.204883	0.0018985
228	347790		0.203371	371110		0.207362	367070		0.205997	0.206469	0.00202834
231	345530		0.20205	364650		0.203753	371840		0.208674	0.203883	0.0034398
234	344700		0.201565	360240		0.201289	366800		0.205845	0.202617	0.00255495
237	347820		0.203389	364720		0.203792	365290		0.204998	0.203334	0.000837272
240	347670		0.203301	361730		0.202121	361410		0.202821	0.203219	0.000593425
243	343270		0.200728	361150		0.201797	363930		0.204235	0.202199	0.00179721
246	343970		0.201138	359340		0.200786	363640		0.204072	0.201394	0.00180437
249	339770		0.198682	357930		0.199998	360410		0.202259	0.200313	0.00180954
252	339200		0.198348	355450		0.198612	360410		0.202259	0.199046	0.00218586
255	340500		0.199109	358020		0.200048	356700		0.200177	0.200197	0.000583352
258	333820		0.195202	357460		0.199735	358940		0.201434	0.198523	0.00322159
261	338690		0.19805	348870		0.194935	357510		0.200632	0.197708	0.00285239
264	336760		0.196922	349040		0.19503	356630		0.200138	0.197128	0.00258232
267	333640		0.195097	350620		0.195913	355370		0.199431	0.196335	0.00230297
270	336970		0.197044	349870		0.195494	352810		0.197994	0.19746	0.001262
273	330380		0.193191	348670		0.194824	356100		0.199841	0.195071	0.00346544
276	330670		0.19336	348640		0.194807	351390		0.197197	0.195155	0.00193775
279	328250		0.191945	348850		0.194924	351570		0.197298	0.194745	0.00268224
282	327800		0.191682	349330		0.195193	351690		0.197366	0.194085	0.00286788
285	332250		0.194284	344140		0.192293	348150		0.195379	0.19407	0.0015649
288	328360		0.19201	347930		0.19441	348600		0.195632	0.194021	0.00184273
291	327250		0.191361	345120		0.19284	348620		0.195643	0.19368	0.00217498
294	324840		0.189951	342470		0.191359	350750		0.196838	0.191343	0.00363847
297	324760		0.189905	342000		0.191097	343410		0.192719	0.191938	0.00141275
300	327660		0.1916	344010		0.19222	347140		0.194812	0.191888	0.00170401
303	328160		0.191893	340240		0.190113	341850		0.191844	0.19141	0.00101346
306	323720		0.189296	342780		0.191533	342530		0.192225	0.191804	0.00153072
309	324060		0.189495	338140		0.18894	346730		0.194582	0.190013	0.00310973
312	327080		0.191261	338960		0.189398	341420		0.191602	0.190926	0.00118645
315	319800		0.187004	336960		0.188281	342340		0.192119	0.188961	0.002662
318	320780		0.187577	341570		0.190857	341410		0.191597	0.189821	0.00213923
321	322320		0.188478	337440		0.188549	340400		0.19103	0.18962	0.00145342
324	322970		0.188858	339490		0.189694	341830		0.191832	0.189889	0.00153403
327	320520		0.187425	336500		0.188024	340550		0.191114	0.188804	0.00197979
330	321620		0.188068	337130		0.188376	340280		0.190963	0.189036	0.00158971
333	319980		0.187109	337350		0.188499	339750		0.190665	0.188066	0.00179197
336	319150		0.186624	337900		0.188806	336050		0.188589	0.188096	0.00120188
339	319370		0.186753	336030		0.187761	336530		0.188858	0.186984	0.001053
342	316670		0.185174	333050		0.186096	332220		0.186439	0.186461	0.000654398
345	319760		0.186981	333120		0.186135	335200		0.188112	0.187353	0.000991808
348	313440		0.183285	331180		0.185051	336680		0.188942	0.185786	0.00289436
351	314170		0.183712	331740		0.185364	336820		0.189021	0.185316	0.0027168
354	311220		0.181987	329900		0.184336	332990		0.186872	0.184634	0.00244285
357	315210		0.18432	331570		0.185269	334250		0.187579	0.185154	0.00167592
360	315750		0.184636	329710		0.18423	331210		0.185873	0.185775	0.00085575
363	315790		0.184659	330950		0.184922	335820		0.18846	0.185322	0.00212226
366	311000		0.181858	330760		0.184816	332120		0.186383	0.183921	0.00229781
369	315980		0.18477	326580		0.182481	329810		0.185087	0.184077	0.00142219
372	311140		0.18194	324030		0.181056	329620		0.18498	0.182623	0.00205854
375	312190		0.182554	329590		0.184163	329430		0.184874	0.183987	0.00118829
378	309180		0.180794	327350		0.182911	330090		0.185244	0.182934	0.00222585
381	307350		0.179724	326420		0.182391	329830		0.185098	0.181838	0.00268709
384	313280		0.183192	325850		0.182073	326800		0.183398	0.183585	0.000712951
387	308500		0.180396	325870		0.182084	330530		0.185491	0.182588	0.00259517
390	310930		0.181817	326430		0.182397	330160		0.185283	0.182509	0.00185652
393	310480		0.181554	322410		0.180151	326650		0.183314	0.181933	0.00158479
396	308870		0.180613	322180		0.180022	328040		0.184094	0.181135	0.00220007
399	308760		0.180549	319960		0.178782	325680		0.182769	0.180844	0.00199807
402	305430		0.178601	319590		0.178575	326450		0.183201	0.178588	0.00266347
