# Supplementary material for: Cryo-EM structures of the caspase-activated protein XKR9 involved in apoptotic lipid scrambling
Source: eLife journal article supplement (doi:10.7554/elife.69800), 2021-07-15
Supplement: supp [file Figure_1_figure_supplement_3_source_data_3.xlsx]

## Sheet: Sheet1
Mass [Da]	Intensity [Count]
40000	85.11
40000.5	113.6
40001	157.6
40001.5	217.9
40002	295.5
40002.5	391.8
40003	508.5
40003.5	647.9
40004	812.5
40004.5	1006
40005	1232
40005.5	1496
40006	1803
40006.5	2162
40007	2581
40007.5	3070
40008	3641
40008.5	4304
40009	5069
40009.5	5942
40010	6918
40010.5	7982
40011	9103
40011.5	10230
40012	11310
40012.5	12260
40013	13000
40013.5	13490
40014	13660
40014.5	13520
40015	13070
40015.5	12380
40016	11490
40016.5	10480
40017	9431
40017.5	8390
40018	7407
40018.5	6512
40019	5723
40019.5	5044
40020	4475
40020.5	4007
40021	3633
40021.5	3343
40022	3127
40022.5	2977
40023	2887
40023.5	2851
40024	2865
40024.5	2926
40025	3031
40025.5	3179
40026	3366
40026.5	3592
40027	3854
40027.5	4148
40028	4468
40028.5	4807
40029	5157
40029.5	5507
40030	5843
40030.5	6150
40031	6415
40031.5	6621
40032	6757
40032.5	6812
40033	6780
40033.5	6659
40034	6453
40034.5	6171
40035	5823
40035.5	5426
40036	4995
40036.5	4547
40037	4098
40037.5	3660
40038	3245
40038.5	2861
40039	2513
40039.5	2206
40040	1940
40040.5	1716
40041	1533
40041.5	1389
40042	1283
40042.5	1213
40043	1177
40043.5	1175
40044	1205
40044.5	1267
40045	1360
40045.5	1485
40046	1641
40046.5	1826
40047	2040
40047.5	2281
40048	2543
40048.5	2822
40049	3113
40049.5	3406
40050	3695
40050.5	3971
40051	4231
40051.5	4473
40052	4700
40052.5	4921
40053	5155
40053.5	5424
40054	5759
40054.5	6197
40055	6777
40055.5	7541
40056	8533
40056.5	9789
40057	11340
40057.5	13210
40058	15390
40058.5	17870
40059	20590
40059.5	23490
40060	26460
40060.5	29390
40061	32150
40061.5	34610
40062	36660
40062.5	38210
40063	39200
40063.5	39630
40064	39520
40064.5	38920
40065	37930
40065.5	36650
40066	35220
40066.5	33760
40067	32390
40067.5	31230
40068	30360
40068.5	29840
40069	29680
40069.5	29890
40070	30380
40070.5	31080
40071	31840
40071.5	32510
40072	32940
40072.5	32980
40073	32540
40073.5	31570
40074	30070
40074.5	28130
40075	25850
40075.5	23360
40076	20800
40076.5	18300
40077	15950
40077.5	13810
40078	11930
40078.5	10300
40079	8936
40079.5	7808
40080	6896
40080.5	6175
40081	5620
40081.5	5210
40082	4924
40082.5	4748
40083	4668
40083.5	4673
40084	4752
40084.5	4899
40085	5104
40085.5	5360
40086	5657
40086.5	5986
40087	6335
40087.5	6693
40088	7044
40088.5	7377
40089	7675
40089.5	7929
40090	8126
40090.5	8261
40091	8329
40091.5	8330
40092	8265
40092.5	8141
40093	7962
40093.5	7739
40094	7478
40094.5	7190
40095	6884
40095.5	6568
40096	6250
40096.5	5939
40097	5641
40097.5	5363
40098	5108
40098.5	4882
40099	4685
40099.5	4521
40100	4389
40100.5	4288
40101	4220
40101.5	4180
40102	4169
40102.5	4185
40103	4226
40103.5	4292
40104	4382
40104.5	4496
40105	4636
40105.5	4805
40106	5004
40106.5	5238
40107	5511
40107.5	5826
40108	6186
40108.5	6594
40109	7050
40109.5	7554
40110	8102
40110.5	8688
40111	9306
40111.5	9946
40112	10600
40112.5	11250
40113	11890
40113.5	12520
40114	13110
40114.5	13670
40115	14200
40115.5	14680
40116	15120
40116.5	15530
40117	15910
40117.5	16280
40118	16650
40118.5	17020
40119	17410
40119.5	17850
40120	18360
40120.5	18940
40121	19630
40121.5	20440
40122	21400
40122.5	22510
40123	23790
40123.5	25230
40124	26820
40124.5	28510
40125	30240
40125.5	31940
40126	33490
40126.5	34790
40127	35720
40127.5	36200
40128	36140
40128.5	35520
40129	34370
40129.5	32720
40130	30690
40130.5	28360
40131	25870
40131.5	23310
40132	20800
40132.5	18390
40133	16150
40133.5	14110
40134	12290
40134.5	10680
40135	9289
40135.5	8094
40136	7081
40136.5	6234
40137	5535
40137.5	4969
40138	4522
40138.5	4183
40139	3944
40139.5	3798
40140	3743
40140.5	3779
40141	3909
40141.5	4138
40142	4477
40142.5	4938
40143	5538
40143.5	6295
40144	7232
40144.5	8370
40145	9730
40145.5	11330
40146	13170
40146.5	15240
40147	17520
40147.5	19970
40148	22490
40148.5	25000
40149	27370
40149.5	29470
40150	31180
40150.5	32380
40151	33000
40151.5	33000
40152	32380
40152.5	31200
40153	29540
40153.5	27540
40154	25300
40154.5	22950
40155	20600
40155.5	18350
40156	16230
40156.5	14300
40157	12580
40157.5	11050
40158	9711
40158.5	8548
40159	7541
40159.5	6671
40160	5922
40160.5	5278
40161	4728
40161.5	4262
40162	3872
40162.5	3552
40163	3300
40163.5	3111
40164	2987
40164.5	2926
40165	2931
40165.5	3006
40166	3156
40166.5	3390
40167	3717
40167.5	4150
40168	4705
40168.5	5400
40169	6259
40169.5	7305
40170	8568
40170.5	10080
40171	11860
40171.5	13960
40172	16400
40172.5	19190
40173	22340
40173.5	25830
40174	29630
40174.5	33650
40175	37780
40175.5	41840
40176	45660
40176.5	49010
40177	51690
40177.5	53530
40178	54390
40178.5	54220
40179	53060
40179.5	50990
40180	48190
40180.5	44850
40181	41180
40181.5	37370
40182	33600
40182.5	30000
40183	26670
40183.5	23640
40184	20960
40184.5	18620
40185	16610
40185.5	14900
40186	13460
40186.5	12260
40187	11290
40187.5	10510
40188	9904
40188.5	9463
40189	9174
40189.5	9032
40190	9033
40190.5	9180
40191	9477
40191.5	9933
40192	10560
40192.5	11370
40193	12380
40193.5	13610
40194	15060
40194.5	16750
40195	18660
40195.5	20780
40196	23070
40196.5	25460
40197	27860
40197.5	30140
40198	32150
40198.5	33740
40199	34760
40199.5	35100
40200	34700
40200.5	33540
40201	31690
40201.5	29270
40202	26450
40202.5	23410
40203	20320
40203.5	17330
40204	14550
40204.5	12060
40205	9887
40205.5	8037
40206	6493
40206.5	5225
40207	4197
40207.5	3373
40208	2720
40208.5	2208
40209	1812
40209.5	1512
40210	1294
40210.5	1145
40211	1058
40211.5	1029
40212	1056
40212.5	1141
40213	1288
40213.5	1505
40214	1805
40214.5	2204
40215	2724
40215.5	3395
40216	4255
40216.5	5349
40217	6736
40217.5	8482
40218	10670
40218.5	13370
40219	16660
40219.5	20610
40220	25240
40220.5	30520
40221	36330
40221.5	42450
40222	48560
40222.5	54240
40223	59020
40223.5	62460
40224	64190
40224.5	64010
40225	61940
40225.5	58170
40226	53090
40226.5	47170
40227	40880
40227.5	34660
40228	28840
40228.5	23650
40229	19190
40229.5	15470
40230	12440
40230.5	10040
40231	8169
40231.5	6731
40232	5648
40232.5	4851
40233	4288
40233.5	3917
40234	3710
40234.5	3648
40235	3721
40235.5	3925
40236	4263
40236.5	4743
40237	5377
40237.5	6178
40238	7163
40238.5	8345
40239	9738
40239.5	11350
40240	13180
40240.5	15210
40241	17430
40241.5	19810
40242	22290
40242.5	24840
40243	27370
40243.5	29820
40244	32090
40244.5	34090
40245	35700
40245.5	36830
40246	37380
40246.5	37280
40247	36500
40247.5	35070
40248	33060
40248.5	30580
40249	27770
40249.5	24800
40250	21800
40250.5	18900
40251	16200
40251.5	13750
40252	11600
40252.5	9736
40253	8161
40253.5	6850
40254	5775
40254.5	4906
40255	4218
40255.5	3687
40256	3292
40256.5	3020
40257	2859
40257.5	2806
40258	2859
40258.5	3024
40259	3310
40259.5	3732
40260	4311
40260.5	5071
40261	6042
40261.5	7256
40262	8749
40262.5	10550
40263	12690
40263.5	15200
40264	18060
40264.5	21280
40265	24840
40265.5	28670
40266	32730
40266.5	36910
40267	41130
40267.5	45270
40268	49200
40268.5	52790
40269	55920
40269.5	58460
40270	60300
40270.5	61380
40271	61650
40271.5	61120
40272	59860
40272.5	57940
40273	55510
40273.5	52710
40274	49680
40274.5	46570
40275	43490
40275.5	40540
40276	37780
40276.5	35250
40277	32960
40277.5	30930
40278	29120
40278.5	27510
40279	26070
40279.5	24780
40280	23580
40280.5	22470
40281	21390
40281.5	20340
40282	19300
40282.5	18250
40283	17180
40283.5	16110
40284	15020
40284.5	13920
40285	12840
40285.5	11780
40286	10750
40286.5	9768
40287	8848
40287.5	7997
40288	7223
40288.5	6530
40289	5919
40289.5	5391
40290	4944
40290.5	4578
40291	4291
40291.5	4082
40292	3952
40292.5	3902
40293	3938
40293.5	4066
40294	4299
40294.5	4652
40295	5148
40295.5	5816
40296	6695
40296.5	7831
40297	9284
40297.5	11120
40298	13420
40298.5	16250
40299	19690
40299.5	23790
40300	28540
40300.5	33890
40301	39710
40301.5	45770
40302	51750
40302.5	57280
40303	61980
40303.5	65510
40304	67660
40304.5	68340
40305	67610
40305.5	65680
40306	62810
40306.5	59270
40307	55300
40307.5	51090
40308	46740
40308.5	42340
40309	37950
40309.5	33600
40310	29360
40310.5	25290
40311	21450
40311.5	17910
40312	14710
40312.5	11880
40313	9439
40313.5	7366
40314	5639
40314.5	4225
40315	3082
40315.5	2169
40316	1447
40316.5	878.1
40317	432.8
40317.5	84.95
40328	83.89
40328.5	401.3
40329	797.7
40329.5	1293
40330	1910
40330.5	2680
40331	3639
40331.5	4828
40332	6294
40332.5	8089
40333	10260
40333.5	12850
40334	15880
40334.5	19350
40335	23220
40335.5	27400
40336	31760
40336.5	36140
40337	40310
40337.5	44080
40338	47260
40338.5	49700
40339	51300
40339.5	52030
40340	51950
40340.5	51150
40341	49760
40341.5	47950
40342	45870
40342.5	43670
40343	41480
40343.5	39390
40344	37480
40344.5	35820
40345	34440
40345.5	33360
40346	32610
40346.5	32190
40347	32120
40347.5	32410
40348	33080
40348.5	34140
40349	35620
40349.5	37540
40350	39940
40350.5	42860
40351	46340
40351.5	50410
40352	55100
40352.5	60430
40353	66400
40353.5	72980
40354	80080
40354.5	87590
40355	95320
40355.5	103000
40356	110400
40356.5	117100
40357	122800
40357.5	127100
40358	129800
40358.5	130600
40359	129400
40359.5	126300
40360	121400
40360.5	115000
40361	107400
40361.5	99080
40362	90340
40362.5	81550
40363	73010
40363.5	64960
40364	57550
40364.5	50880
40365	44960
40365.5	39790
40366	35310
40366.5	31470
40367	28180
40367.5	25360
40368	22940
40368.5	20840
40369	19010
40369.5	17400
40370	15960
40370.5	14660
40371	13490
40371.5	12430
40372	11470
40372.5	10610
40373	9847
40373.5	9182
40374	8613
40374.5	8139
40375	7760
40375.5	7475
40376	7281
40376.5	7179
40377	7168
40377.5	7250
40378	7427
40378.5	7706
40379	8094
40379.5	8602
40380	9244
40380.5	10040
40381	11000
40381.5	12170
40382	13560
40382.5	15220
40383	17180
40383.5	19480
40384	22170
40384.5	25280
40385	28860
40385.5	32930
40386	37520
40386.5	42630
40387	48250
40387.5	54340
40388	60830
40388.5	67640
40389	74630
40389.5	81640
40390	88510
40390.5	95020
40391	101000
40391.5	106200
40392	110500
40392.5	113700
40393	115800
40393.5	116700
40394	116300
40394.5	114900
40395	112500
40395.5	109300
40396	105400
40396.5	101200
40397	96610
40397.5	92000
40398	87460
40398.5	83100
40399	79030
40399.5	75310
40400	71960
40400.5	69020
40401	66470
40401.5	64290
40402	62480
40402.5	60980
40403	59780
40403.5	58820
40404	58070
40404.5	57490
40405	57050
40405.5	56700
40406	56400
40406.5	56130
40407	55860
40407.5	55540
40408	55160
40408.5	54700
40409	54130
40409.5	53460
40410	52690
40410.5	51820
40411	50890
40411.5	49920
40412	48950
40412.5	48020
40413	47190
40413.5	46510
40414	46030
40414.5	45790
40415	45850
40415.5	46240
40416	47010
40416.5	48170
40417	49770
40417.5	51800
40418	54280
40418.5	57200
40419	60540
40419.5	64260
40420	68310
40420.5	72590
40421	77030
40421.5	81490
40422	85840
40422.5	89940
40423	93630
40423.5	96780
40424	99250
40424.5	100900
40425	101800
40425.5	101700
40426	100700
40426.5	98890
40427	96280
40427.5	93020
40428	89230
40428.5	85050
40429	80630
40429.5	76100
40430	71590
40430.5	67210
40431	63010
40431.5	59070
40432	55410
40432.5	52060
40433	49010
40433.5	46270
40434	43820
40434.5	41650
40435	39750
40435.5	38100
40436	36690
40436.5	35510
40437	34530
40437.5	33760
40438	33190
40438.5	32810
40439	32610
40439.5	32610
40440	32790
40440.5	33160
40441	33730
40441.5	34500
40442	35500
40442.5	36730
40443	38230
40443.5	40030
40444	42160
40444.5	44680
40445	47640
40445.5	51110
40446	55170
40446.5	59890
40447	65360
40447.5	71660
40448	78850
40448.5	86960
40449	96010
40449.5	105900
40450	116600
40450.5	127900
40451	139400
40451.5	150900
40452	162000
40452.5	172200
40453	181000
40453.5	188000
40454	192800
40454.5	195300
40455	195300
40455.5	192800
40456	188000
40456.5	181300
40457	172900
40457.5	163500
40458	153300
40458.5	143000
40459	132900
40459.5	123300
40460	114500
40460.5	106700
40461	99980
40461.5	94370
40462	89850
40462.5	86360
40463	83810
40463.5	82040
40464	80920
40464.5	80270
40465	79920
40465.5	79690
40466	79410
40466.5	78930
40467	78130
40467.5	76930
40468	75270
40468.5	73150
40469	70630
40469.5	67770
40470	64680
40470.5	61480
40471	58310
40471.5	55290
40472	52530
40472.5	50120
40473	48130
40473.5	46620
40474	45590
40474.5	45080
40475	45080
40475.5	45580
40476	46550
40476.5	47960
40477	49790
40477.5	51990
40478	54500
40478.5	57260
40479	60200
40479.5	63250
40480	66310
40480.5	69280
40481	72090
40481.5	74620
40482	76790
40482.5	78520
40483	79740
40483.5	80410
40484	80500
40484.5	80000
40485	78930
40485.5	77300
40486	75180
40486.5	72630
40487	69710
40487.5	66510
40488	63100
40488.5	59570
40489	55990
40489.5	52430
40490	48960
40490.5	45620
40491	42460
40491.5	39510
40492	36810
40492.5	34360
40493	32170
40493.5	30260
40494	28630
40494.5	27270
40495	26170
40495.5	25350
40496	24780
40496.5	24470
40497	24420
40497.5	24620
40498	25090
40498.5	25820
40499	26830
40499.5	28130
40500	29740
40500.5	31660
40501	33910
40501.5	36510
40502	39470
40502.5	42810
40503	46510
40503.5	50570
40504	54970
40504.5	59670
40505	64600
40505.5	69670
40506	74790
40506.5	79820
40507	84610
40507.5	89000
40508	92830
40508.5	95940
40509	98210
40509.5	99540
40510	99880
40510.5	99210
40511	97590
40511.5	95090
40512	91830
40512.5	87980
40513	83680
40513.5	79110
40514	74400
40514.5	69700
40515	65120
40515.5	60750
40516	56660
40516.5	52890
40517	49460
40517.5	46380
40518	43640
40518.5	41240
40519	39160
40519.5	37380
40520	35880
40520.5	34650
40521	33650
40521.5	32890
40522	32340
40522.5	31990
40523	31830
40523.5	31860
40524	32060
40524.5	32430
40525	32970
40525.5	33680
40526	34530
40526.5	35540
40527	36690
40527.5	37980
40528	39390
40528.5	40900
40529	42510
40529.5	44190
40530	45920
40530.5	47670
40531	49430
40531.5	51160
40532	52850
40532.5	54480
40533	56030
40533.5	57510
40534	58910
40534.5	60240
40535	61520
40535.5	62760
40536	63980
40536.5	65200
40537	66460
40537.5	67760
40538	69120
40538.5	70560
40539	72070
40539.5	73650
40540	75300
40540.5	76990
40541	78690
40541.5	80380
40542	81990
40542.5	83500
40543	84840
40543.5	85980
40544	86850
40544.5	87410
40545	87620
40545.5	87470
40546	86930
40546.5	86000
40547	84710
40547.5	83090
40548	81190
40548.5	79050
40549	76740
40549.5	74320
40550	71850
40550.5	69400
40551	67010
40551.5	64730
40552	62600
40552.5	60640
40553	58880
40553.5	57310
40554	55960
40554.5	54820
40555	53890
40555.5	53170
40556	52660
40556.5	52350
40557	52250
40557.5	52350
40558	52660
40558.5	53190
40559	53960
40559.5	54960
40560	56210
40560.5	57730
40561	59530
40561.5	61610
40562	63990
40562.5	66650
40563	69590
40563.5	72790
40564	76210
40564.5	79790
40565	83460
40565.5	87130
40566	90680
40566.5	93990
40567	96910
40567.5	99310
40568	101000
40568.5	102000
40569	102000
40569.5	101200
40570	99350
40570.5	96620
40571	93080
40571.5	88840
40572	84080
40572.5	78950
40573	73640
40573.5	68310
40574	63120
40574.5	58170
40575	53570
40575.5	49350
40576	45570
40576.5	42210
40577	39280
40577.5	36740
40578	34570
40578.5	32740
40579	31210
40579.5	29960
40580	28950
40580.5	28170
40581	27600
40581.5	27220
40582	27020
40582.5	27010
40583	27160
40583.5	27490
40584	28000
40584.5	28680
40585	29540
40585.5	30590
40586	31850
40586.5	33320
40587	35030
40587.5	37000
40588	39270
40588.5	41870
40589	44860
40589.5	48310
40590	52310
40590.5	56940
40591	62330
40591.5	68600
40592	75880
40592.5	84310
40593	93980
40593.5	105000
40594	117200
40594.5	130700
40595	145200
40595.5	160500
40596	176000
40596.5	191400
40597	206100
40597.5	219600
40598	231300
40598.5	240800
40599	247800
40599.5	252100
40600	253600
40600.5	252600
40601	249100
40601.5	243500
40602	236300
40602.5	227700
40603	218300
40603.5	208300
40604	198200
40604.5	188200
40605	178500
40605.5	169400
40606	160800
40606.5	153100
40607	146100
40607.5	140000
40608	134700
40608.5	130200
40609	126600
40609.5	123800
40610	121700
40610.5	120300
40611	119400
40611.5	118900
40612	118700
40612.5	118600
40613	118400
40613.5	117900
40614	116900
40614.5	115400
40615	113200
40615.5	110300
40616	106700
40616.5	102600
40617	98110
40617.5	93360
40618	88540
40618.5	83820
40619	79350
40619.5	75230
40620	71550
40620.5	68360
40621	65670
40621.5	63490
40622	61800
40622.5	60570
40623	59760
40623.5	59350
40624	59280
40624.5	59530
40625	60060
40625.5	60840
40626	61850
40626.5	63060
40627	64450
40627.5	65990
40628	67670
40628.5	69470
40629	71380
40629.5	73380
40630	75460
40630.5	77600
40631	79790
40631.5	82010
40632	84240
40632.5	86470
40633	88660
40633.5	90770
40634	92750
40634.5	94550
40635	96100
40635.5	97330
40636	98140
40636.5	98480
40637	98250
40637.5	97420
40638	95950
40638.5	93840
40639	91140
40639.5	87920
40640	84260
40640.5	80290
40641	76140
40641.5	71920
40642	67750
40642.5	63730
40643	59940
40643.5	56440
40644	53260
40644.5	50430
40645	47960
40645.5	45850
40646	44090
40646.5	42660
40647	41560
40647.5	40760
40648	40260
40648.5	40050
40649	40100
40649.5	40430
40650	41010
40650.5	41850
40651	42940
40651.5	44290
40652	45870
40652.5	47700
40653	49770
40653.5	52060
40654	54560
40654.5	57260
40655	60130
40655.5	63140
40656	66250
40656.5	69410
40657	72570
40657.5	75670
40658	78610
40658.5	81320
40659	83700
40659.5	85670
40660	87120
40660.5	87990
40661	88190
40661.5	87680
40662	86440
40662.5	84480
40663	81850
40663.5	78620
40664	74880
40664.5	70750
40665	66360
40665.5	61810
40666	57240
40666.5	52730
40667	48370
40667.5	44220
40668	40320
40668.5	36710
40669	33390
40669.5	30370
40670	27650
40670.5	25200
40671	23020
40671.5	21090
40672	19390
40672.5	17900
40673	16610
40673.5	15510
40674	14580
40674.5	13810
40675	13190
40675.5	12710
40676	12370
40676.5	12160
40677	12090
40677.5	12140
40678	12330
40678.5	12660
40679	13140
40679.5	13760
40680	14550
40680.5	15510
40681	16660
40681.5	18010
40682	19570
40682.5	21360
40683	23400
40683.5	25710
40684	28280
40684.5	31150
40685	34320
40685.5	37790
40686	41570
40686.5	45670
40687	50080
40687.5	54820
40688	59870
40688.5	65250
40689	70970
40689.5	77040
40690	83470
40690.5	90260
40691	97410
40691.5	104900
40692	112700
40692.5	120600
40693	128700
40693.5	136600
40694	144300
40694.5	151400
40695	157800
40695.5	163100
40696	167100
40696.5	169500
40697	170300
40697.5	169300
40698	166600
40698.5	162100
40699	156100
40699.5	148700
40700	140300
40700.5	131200
40701	121500
40701.5	111700
40702	101900
40702.5	92420
40703	83360
40703.5	74860
40704	66990
40704.5	59800
40705	53300
40705.5	47470
40706	42290
40706.5	37710
40707	33680
40707.5	30150
40708	27070
40708.5	24380
40709	22050
40709.5	20010
40710	18250
40710.5	16710
40711	15380
40711.5	14230
40712	13230
40712.5	12370
40713	11630
40713.5	11000
40714	10470
40714.5	10020
40715	9664
40715.5	9381
40716	9172
40716.5	9035
40717	8970
40717.5	8975
40718	9052
40718.5	9204
40719	9433
40719.5	9744
40720	10140
40720.5	10640
40721	11230
40721.5	11930
40722	12750
40722.5	13700
40723	14780
40723.5	16010
40724	17390
40724.5	18930
40725	20630
40725.5	22500
40726	24540
40726.5	26730
40727	29050
40727.5	31490
40728	34000
40728.5	36530
40729	39040
40729.5	41440
40730	43670
40730.5	45640
40731	47290
40731.5	48560
40732	49380
40732.5	49740
40733	49630
40733.5	49070
40734	48090
40734.5	46730
40735	45080
40735.5	43180
40736	41130
40736.5	38970
40737	36790
40737.5	34620
40738	32510
40738.5	30500
40739	28620
40739.5	26880
40740	25290
40740.5	23870
40741	22610
40741.5	21520
40742	20600
40742.5	19860
40743	19280
40743.5	18860
40744	18620
40744.5	18550
40745	18650
40745.5	18940
40746	19420
40746.5	20100
40747	21010
40747.5	22140
40748	23530
40748.5	25180
40749	27120
40749.5	29370
40750	31940
40750.5	34830
40751	38050
40751.5	41590
40752	45430
40752.5	49530
40753	53840
40753.5	58280
40754	62770
40754.5	67210
40755	71470
40755.5	75440
40756	78990
40756.5	81990
40757	84340
40757.5	85940
40758	86730
40758.5	86640
40759	85690
40759.5	83870
40760	81240
40760.5	77860
40761	73830
40761.5	69260
40762	64280
40762.5	59000
40763	53580
40763.5	48140
40764	42800
40764.5	37680
40765	32860
40765.5	28420
40766	24410
40766.5	20850
40767	17740
40767.5	15080
40768	12830
40768.5	10960
40769	9430
40769.5	8189
40770	7197
40770.5	6412
40771	5800
40771.5	5328
40772	4970
40772.5	4705
40773	4516
40773.5	4388
40774	4312
40774.5	4279
40775	4283
40775.5	4319
40776	4383
40776.5	4474
40777	4591
40777.5	4731
40778	4895
40778.5	5082
40779	5293
40779.5	5529
40780	5787
40780.5	6069
40781	6372
40781.5	6694
40782	7032
40782.5	7381
40783	7736
40783.5	8091
40784	8436
40784.5	8764
40785	9064
40785.5	9328
40786	9545
40786.5	9708
40787	9811
40787.5	9848
40788	9820
40788.5	9728
40789	9580
40789.5	9388
40790	9171
40790.5	8958
40791	8792
40791.5	8736
40792	8884
40792.5	9375
40793	10410
40793.5	12300
40794	15450
40794.5	20440
40795	28010
40795.5	39040
40796	54540
40796.5	75480
40797	102600
40797.5	136300
40798	176100
40798.5	220800
40799	267900
40799.5	314300
40800	356200
40800.5	390000
40801	412400
40801.5	421500
40802	416800
40802.5	399000
40803	370400
40803.5	334100
40804	293300
40804.5	251100
40805	210300
40805.5	172700
40806	139500
40806.5	111300
40807	88010
40807.5	69340
40808	54730
40808.5	43550
40809	35180
40809.5	29050
40810	24670
40810.5	21620
40811	19570
40811.5	18250
40812	17470
40812.5	17050
40813	16850
40813.5	16790
40814	16780
40814.5	16750
40815	16660
40815.5	16480
40816	16190
40816.5	15780
40817	15260
40817.5	14630
40818	13930
40818.5	13170
40819	12370
40819.5	11560
40820	10770
40820.5	10010
40821	9301
40821.5	8652
40822	8072
40822.5	7566
40823	7139
40823.5	6790
40824	6522
40824.5	6334
40825	6226
40825.5	6201
40826	6258
40826.5	6398
40827	6623
40827.5	6934
40828	7333
40828.5	7823
40829	8404
40829.5	9078
40830	9847
40830.5	10710
40831	11670
40831.5	12730
40832	13880
40832.5	15120
40833	16460
40833.5	17880
40834	19380
40834.5	20940
40835	22560
40835.5	24220
40836	25880
40836.5	27530
40837	29110
40837.5	30600
40838	31950
40838.5	33120
40839	34070
40839.5	34770
40840	35210
40840.5	35380
40841	35290
40841.5	34970
40842	34460
40842.5	33790
40843	33040
40843.5	32250
40844	31470
40844.5	30760
40845	30160
40845.5	29700
40846	29410
40846.5	29300
40847	29400
40847.5	29690
40848	30180
40848.5	30870
40849	31740
40849.5	32770
40850	33960
40850.5	35260
40851	36660
40851.5	38130
40852	39610
40852.5	41070
40853	42470
40853.5	43750
40854	44870
40854.5	45790
40855	46450
40855.5	46820
40856	46880
40856.5	46620
40857	46030
40857.5	45130
40858	43950
40858.5	42520
40859	40880
40859.5	39090
40860	37210
40860.5	35270
40861	33340
40861.5	31440
40862	29610
40862.5	27890
40863	26270
40863.5	24780
40864	23410
40864.5	22150
40865	21000
40865.5	19930
40866	18950
40866.5	18020
40867	17150
40867.5	16300
40868	15490
40868.5	14690
40869	13900
40869.5	13130
40870	12370
40870.5	11630
40871	10910
40871.5	10210
40872	9543
40872.5	8912
40873	8322
40873.5	7777
40874	7281
40874.5	6835
40875	6444
40875.5	6106
40876	5823
40876.5	5594
40877	5419
40877.5	5295
40878	5222
40878.5	5196
40879	5217
40879.5	5283
40880	5391
40880.5	5542
40881	5733
40881.5	5964
40882	6236
40882.5	6550
40883	6906
40883.5	7308
40884	7757
40884.5	8256
40885	8809
40885.5	9419
40886	10090
40886.5	10820
40887	11620
40887.5	12490
40888	13420
40888.5	14420
40889	15490
40889.5	16610
40890	17770
40890.5	18980
40891	20210
40891.5	21430
40892	22640
40892.5	23800
40893	24880
40893.5	25870
40894	26730
40894.5	27430
40895	27970
40895.5	28320
40896	28480
40896.5	28450
40897	28240
40897.5	27860
40898	27330
40898.5	26660
40899	25890
40899.5	25030
40900	24120
40900.5	23170
40901	22200
40901.5	21240
40902	20300
40902.5	19400
40903	18540
40903.5	17730
40904	16980
40904.5	16300
40905	15680
40905.5	15130
40906	14660
40906.5	14250
40907	13930
40907.5	13680
40908	13510
40908.5	13410
40909	13400
40909.5	13460
40910	13590
40910.5	13790
40911	14030
40911.5	14300
40912	14570
40912.5	14800
40913	14970
40913.5	15040
40914	15000
40914.5	14810
40915	14470
40915.5	13990
40916	13380
40916.5	12660
40917	11850
40917.5	10990
40918	10110
40918.5	9227
40919	8367
40919.5	7548
40920	6782
40920.5	6079
40921	5443
40921.5	4876
40922	4379
40922.5	3950
40923	3585
40923.5	3283
40924	3039
40924.5	2850
40925	2714
40925.5	2629
40926	2594
40926.5	2608
40927	2672
40927.5	2787
40928	2955
40928.5	3180
40929	3466
40929.5	3815
40930	4233
40930.5	4724
40931	5289
40931.5	5930
40932	6647
40932.5	7434
40933	8283
40933.5	9183
40934	10120
40934.5	11060
40935	11990
40935.5	12890
40936	13720
40936.5	14460
40937	15080
40937.5	15560
40938	15900
40938.5	16070
40939	16080
40939.5	15940
40940	15640
40940.5	15210
40941	14660
40941.5	14020
40942	13320
40942.5	12560
40943	11780
40943.5	11000
40944	10230
40944.5	9484
40945	8775
40945.5	8110
40946	7493
40946.5	6926
40947	6411
40947.5	5946
40948	5530
40948.5	5162
40949	4838
40949.5	4556
40950	4314
40950.5	4109
40951	3939
40951.5	3802
40952	3697
40952.5	3622
40953	3576
40953.5	3558
40954	3567
40954.5	3602
40955	3662
40955.5	3746
40956	3853
40956.5	3980
40957	4125
40957.5	4286
40958	4459
40958.5	4640
40959	4823
40959.5	5004
40960	5176
40960.5	5333
40961	5470
40961.5	5580
40962	5659
40962.5	5704
40963	5711
40963.5	5680
40964	5613
40964.5	5511
40965	5379
40965.5	5222
40966	5047
40966.5	4859
40967	4666
40967.5	4475
40968	4291
40968.5	4120
40969	3966
40969.5	3834
40970	3727
40970.5	3648
40971	3598
40971.5	3580
40972	3594
40972.5	3643
40973	3727
40973.5	3845
40974	3999
40974.5	4187
40975	4408
40975.5	4660
40976	4937
40976.5	5236
40977	5550
40977.5	5870
40978	6189
40978.5	6496
40979	6785
40979.5	7046
40980	7273
40980.5	7464
40981	7615
40981.5	7727
40982	7802
40982.5	7843
40983	7855
40983.5	7841
40984	7807
40984.5	7754
40985	7688
40985.5	7610
40986	7523
40986.5	7429
40987	7330
40987.5	7228
40988	7125
40988.5	7024
40989	6924
40989.5	6830
40990	6740
40990.5	6658
40991	6583
40991.5	6516
40992	6457
40992.5	6406
40993	6362
40993.5	6325
40994	6294
40994.5	6268
40995	6246
40995.5	6226
40996	6207
40996.5	6186
40997	6163
40997.5	6136
40998	6103
40998.5	6062
40999	6012
40999.5	5952
41000	5881
41000.5	5797
41001	5701
41001.5	5593
41002	5474
41002.5	5346
41003	5210
41003.5	5070
41004	4928
41004.5	4787
41005	4651
41005.5	4521
41006	4403
41006.5	4297
41007	4205
41007.5	4131
41008	4075
41008.5	4037
41009	4019
[truncated: 7,646 more rows]
