# Supplementary material for: Cryo-EM structures of the caspase-activated protein XKR9 involved in apoptotic lipid scrambling
Source: eLife journal article supplement (doi:10.7554/elife.69800), 2021-07-15
Supplement: supp [file Figure_1_source_data_4.xlsx]

## Sheet: rXKR9 uncleaved
rXKR9 uncleaved
	Measurement 1			Measurement 2			Measurement 3			Average	Std.Dev
time [s]	F	Fmax	F/Fmax	F	Fmax	F/Fmax	F	Fmax	F/Fmax	F/Fmax
0	2563000	2542452	1.00808	2530530	2.52262e+06	1.00314	2511390	2.49085e+06	1.00825	1.00649	0.00290358
3	2554700		1.00482	2539280		1.00661	2507840		1.00682	1.00608	0.00109958
6	2555320		1.00506	2522070		0.999783	2513690		1.00917	1.00467	0.00470515
9	2549900		1.00293	2545220		1.00896	2506340		1.00622	1.00604	0.00301937
12	2556790		1.00564	2523850		1.00049	2508530		1.0071	1.00441	0.0034721
15	2554650		1.0048	2535020		1.00492	2500210		1.00376	1.00449	0.000637843
18	2543820		1.00054	2527950		1.00211	2493130		1.00091	1.00119	0.0008229
21	2549520		1.00278	2534040		1.00453	2494000		1.00126	1.00286	0.00163338
24	2543320		1.00034	2532800		1.00404	2487530		0.998667	1.00101	0.00274758
27	2531300		0.995614	2524910		1.00091	2498220		1.00296	0.999827	0.00378991
30	2536520		0.997667	2512760		0.996092	2492020		1.00047	0.998076	0.0022169
33	2530490		0.995295	2515490		0.997175	2492470		1.00065	0.997706	0.00271668
36	2535980		0.997454	2513360		0.99633	2481660		0.99631	0.996698	0.000655012
39	2537660		0.998115	2526540		1.00155	2480700		0.995924	0.998532	0.00283822
42	2535250		0.997167	2519180		0.998637	2473780		0.993146	0.996317	0.00284255
45	2533640		0.996534	2512420		0.995958	2473770		0.993142	0.995211	0.00181485
48	2539660		0.998902	2507920		0.994174	2478760		0.995146	0.996074	0.00249697
51	2533540		0.996495	2513380		0.996338	2476830		0.994371	0.995735	0.00118363
54	2534800		0.99699	2510170		0.995066	2468080		0.990858	0.994305	0.00313621
57	2529180		0.99478	2505460		0.993199	2478080		0.994873	0.994284	0.000940902
60	2273300		0.894137	2151900		0.853043	2193700		0.880703	0.875961	0.0209536
63	1944990		0.765006	1884440		0.747018	1895440		0.760961	0.757661	0.0094369
66	1729380		0.680202	1691370		0.670482	1712320		0.687444	0.679376	0.00851084
69	1588480		0.624783	1545250		0.612558	1568260		0.629608	0.622316	0.00878842
72	1479880		0.582068	1453500		0.576187	1460480		0.586338	0.581531	0.00509647
75	1398970		0.550244	1360480		0.539313	1387890		0.557195	0.548917	0.00901463
78	1339660		0.526917	1306010		0.51772	1319470		0.529726	0.524788	0.00627986
81	1298750		0.510826	1267320		0.502383	1280290		0.513997	0.509069	0.00600308
84	1273380		0.500847	1234930		0.489543	1239980		0.497814	0.496068	0.00585075
87	1242820		0.488827	1210330		0.479791	1215210		0.487869	0.485496	0.00496355
90	1214360		0.477633	1196330		0.474242	1191340		0.478286	0.47672	0.00217143
93	1197760		0.471104	1189590		0.47157	1178450		0.473111	0.471928	0.0010505
96	1184640		0.465944	1169950		0.463784	1163170		0.466977	0.465568	0.00162916
99	1176650		0.462801	1156700		0.458532	1158760		0.465206	0.46218	0.00338048
102	1166840		0.458943	1155860		0.458199	1144040		0.459297	0.458813	0.000560469
105	1159910		0.456217	1147660		0.454948	1141640		0.458333	0.456499	0.00171015
108	1157060		0.455096	1140480		0.452102	1141470		0.458265	0.455154	0.00308198
111	1149440		0.452099	1129800		0.447868	1131680		0.454335	0.451434	0.00328413
114	1144510		0.45016	1128060		0.447178	1122730		0.450741	0.44936	0.00191151
117	1147490		0.451332	1127390		0.446913	1114810		0.447562	0.448602	0.00238626
120	1136040		0.446828	1121140		0.444435	1115670		0.447907	0.44639	0.00177694
123	1130460		0.444634	1120590		0.444217	1110630		0.445884	0.444912	0.000867278
126	1126180		0.44295	1117210		0.442877	1104090		0.443258	0.443029	0.000202076
129	1132460		0.44542	1109960		0.440003	1103980		0.443214	0.442879	0.00272402
132	1121270		0.441019	1107560		0.439052	1103500		0.443021	0.441031	0.00198467
135	1121220		0.440999	1098440		0.435437	1103710		0.443106	0.439847	0.00396217
138	1118120		0.43978	1099320		0.435785	1096420		0.440179	0.438581	0.00242962
141	1113770		0.438069	1098250		0.435361	1092270		0.438513	0.437314	0.00170592
144	1117870		0.439682	1095870		0.434418	1095320		0.439737	0.437946	0.00305528
147	1102090		0.433475	1098770		0.435567	1085760		0.435899	0.434981	0.00131418
150	1104690		0.434498	1093060		0.433304	1084490		0.435389	0.434397	0.00104633
153	1108440		0.435973	1088310		0.431421	1081910		0.434353	0.433916	0.0023073
156	1100900		0.433007	1085550		0.430327	1075930		0.431953	0.431762	0.00135029
159	1100460		0.432834	1083810		0.429637	1081570		0.434217	0.432229	0.00234907
162	1098200		0.431945	1081360		0.428666	1078550		0.433005	0.431205	0.00226202
165	1097710		0.431752	1085810		0.43043	1073350		0.430917	0.431033	0.000668911
168	1103040		0.433849	1076600		0.426779	1072780		0.430688	0.430439	0.00354158
171	1092390		0.42966	1077340		0.427072	1071300		0.430094	0.428942	0.00163375
174	1095490		0.430879	1078870		0.427679	1069800		0.429492	0.42935	0.00160497
177	1089710		0.428606	1076090		0.426577	1067080		0.4284	0.427861	0.00111678
180	1093480		0.430089	1077940		0.42731	1065070		0.427593	0.428331	0.0015292
183	1079520		0.424598	1064580		0.422014	1064110		0.427207	0.424606	0.00259665
186	1081790		0.425491	1071260		0.424662	1057960		0.424738	0.424964	0.000458064
189	1081560		0.4254	1068360		0.423512	1059230		0.425248	0.42472	0.00104879
192	1074870		0.422769	1067840		0.423306	1058790		0.425072	0.423716	0.00120456
195	1079780		0.4247	1060010		0.420202	1052130		0.422398	0.422433	0.00224912
198	1067590		0.419906	1061310		0.420718	1047480		0.420531	0.420385	0.000425311
201	1071300		0.421365	1056460		0.418795	1054480		0.423341	0.421167	0.00227945
204	1068890		0.420417	1063870		0.421733	1041710		0.418214	0.420121	0.00177762
207	1067490		0.419866	1056780		0.418922	1057070		0.424381	0.421056	0.00291759
210	1072950		0.422014	1055840		0.418549	1048280		0.420852	0.420472	0.00176327
213	1069170		0.420527	1052510		0.417229	1044690		0.419411	0.419056	0.00167732
216	1065330		0.419017	1048480		0.415632	1040920		0.417897	0.417515	0.00172452
219	1064740		0.418785	1053180		0.417495	1041280		0.418042	0.418107	0.000647368
222	1057380		0.41589	1048040		0.415457	1044760		0.419439	0.416929	0.00218462
225	1061980		0.417699	1045130		0.414304	1046400		0.420097	0.417367	0.00291102
228	1051720		0.413664	1046830		0.414978	1032120		0.414364	0.414335	0.000657501
231	1055750		0.415249	1040400		0.412429	1037860		0.416669	0.414782	0.00215818
234	1058950		0.416507	1045330		0.414383	1031800		0.414236	0.415042	0.00127109
237	1054840		0.414891	1046570		0.414875	1027340		0.412445	0.41407	0.00140727
240	1054610		0.4148	1041990		0.413059	1032770		0.414625	0.414162	0.000958806
243	1055110		0.414997	1041760		0.412968	1030700		0.413794	0.41392	0.00102037
246	1050180		0.413058	1035030		0.4103	1030510		0.413718	0.412359	0.00181311
249	1050770		0.41329	1034220		0.409979	1030740		0.41381	0.41236	0.0020782
252	1047880		0.412153	1030520		0.408512	1032410		0.414481	0.411715	0.00300828
255	1047120		0.411854	1035280		0.410399	1022440		0.410478	0.410911	0.00081835
258	1044800		0.410942	1038950		0.411854	1019270		0.409205	0.410667	0.00134547
261	1046660		0.411673	1033440		0.40967	1022670		0.41057	0.410638	0.00100357
264	1041800		0.409762	1030840		0.408639	1015880		0.407844	0.408748	0.000963397
267	1044570		0.410851	1027780		0.407426	1019060		0.409121	0.409133	0.00171273
270	1040500		0.409251	1028360		0.407656	1013100		0.406728	0.407878	0.00127573
273	1033690		0.406572	1024350		0.406066	1018760		0.409001	0.407213	0.00156868
276	1036510		0.407681	1023210		0.405614	1016400		0.408053	0.407116	0.0013139
279	1033990		0.40669	1021420		0.404905	1017230		0.408386	0.40666	0.001741
282	1036440		0.407654	1022930		0.405503	1014100		0.40713	0.406762	0.00112127
285	1035730		0.407374	1020830		0.404671	1008320		0.404809	0.405618	0.00152249
288	1030600		0.405357	1021050		0.404758	1008310		0.404805	0.404973	0.000332797
291	1036500		0.407677	1018560		0.403771	1011230		0.405978	0.405809	0.00195859
294	1029020		0.404735	1017140		0.403208	1012340		0.406423	0.404789	0.00160822
297	1029870		0.40507	1014860		0.402304	1008880		0.405034	0.404136	0.00158639
300	1031430		0.405683	1015690		0.402633	1012700		0.406568	0.404961	0.00206412
303	1031170		0.405581	1012420		0.401337	1008430		0.404854	0.403924	0.00226952
306	1025710		0.403433	1007610		0.39943	1006910		0.404243	0.402369	0.00257697
309	1025230		0.403245	1006520		0.398998	1002550		0.402493	0.401579	0.002266
312	1025320		0.40328	1007220		0.399276	1003140		0.40273	0.401762	0.00217051
315	1025520		0.403359	1009180		0.400053	1000150		0.401529	0.401647	0.00165609
318	1023330		0.402497	1007980		0.399577	997900		0.400626	0.4009	0.00147929
321	1021140		0.401636	1009340		0.400116	996640		0.40012	0.400624	0.000876262
324	1019950		0.401168	1001380		0.396961	994290		0.399177	0.399102	0.00210458
327	1018950		0.400775	1000540		0.396628	997690		0.400542	0.399315	0.00232988
330	1017060		0.400031	1006690		0.399066	994970		0.39945	0.399516	0.000486098
333	1019280		0.400904	1001480		0.397	995310		0.399586	0.399164	0.00198601
336	1015560		0.399441	1001630		0.39706	991040		0.397872	0.398124	0.00121057
339	1015800		0.399536	1004730		0.398289	992400		0.398418	0.398747	0.000685621
342	1011010		0.397652	999260		0.39612	992360		0.398402	0.397391	0.00116287
345	1008400		0.396625	1000680		0.396683	993130		0.398711	0.39734	0.00118793
348	1017560		0.400228	989430		0.392224	988120		0.3967	0.396384	0.00401147
351	1008550		0.396684	999980		0.396406	982320		0.394371	0.39582	0.00126267
354	1015080		0.399252	995160		0.394495	988070		0.39668	0.396809	0.00238132
357	1008950		0.396841	993150		0.393698	985640		0.395704	0.395415	0.00159143
360	1004200		0.394973	993620		0.393885	980050		0.39346	0.394106	0.000780497
363	1002380		0.394257	990600		0.392687	985450		0.395628	0.394191	0.00147133
366	1012790		0.398352	986780		0.391173	985610		0.395692	0.395072	0.00362921
369	1008670		0.396731	992600		0.39348	974480		0.391224	0.393812	0.00276869
372	1002700		0.394383	986610		0.391106	980980		0.393833	0.393107	0.00175514
375	1003870		0.394843	984890		0.390424	977710		0.39252	0.392596	0.00221067
378	999790		0.393238	986000		0.390864	980160		0.393504	0.392535	0.00145371
381	1002800		0.394422	977020		0.387304	984770		0.395355	0.39236	0.00440367
384	1000990		0.39371	987370		0.391407	982520		0.394451	0.39319	0.00158768
387	1000160		0.393384	985790		0.390781	971400		0.389987	0.391384	0.001777
390	998070		0.392562	983560		0.389897	978660		0.392902	0.391787	0.00164574
393	1000370		0.393467	977330		0.387427	975580		0.391665	0.390853	0.00310069
396	999430		0.393097	980730		0.388775	975220		0.391521	0.391131	0.0021873
399	986870		0.388157	980600		0.388723	981990		0.394239	0.390373	0.00335982
402	992880		0.390521	976300		0.387019	966590		0.388056	0.388532	0.00179882

## Sheet: rXKR9 uncleaved TCEP
rXKR9 uncleaved TCEP
	Measurement 1			Measurement 2			Measurement 3			Average	Std.Dev
time [s]	F	Fmax	F/Fmax	F	Fmax	F/Fmax	F	Fmax	F/Fmax	F/Fmax
0	2009860	1996477	1.0067	2074340	2.05103e+06	1.01137	2031340	2011821	1.0097	1.00926	0.0023631
3	2010340		1.00694	2068890		1.00871	2045900		1.01694	1.01086	0.00533491
6	2005390		1.00446	2067570		1.00807	2024870		1.00649	1.00634	0.00180508
9	2006410		1.00498	2064670		1.00665	2016740		1.00245	1.00469	0.00211764
12	2005070		1.0043	2062660		1.00567	2020980		1.00455	1.00484	0.000728444
15	1997680		1.0006	2053530		1.00122	2015330		1.00174	1.00119	0.000571452
18	2003650		1.00359	2060970		1.00485	2014810		1.00149	1.00331	0.00169884
21	2003150		1.00334	2056160		1.0025	2014690		1.00143	1.00242	0.000960584
24	2000930		1.00223	2054410		1.00165	2004900		0.99656	1.00015	0.00311969
27	2002450		1.00299	2055920		1.00239	2008520		0.998359	1.00125	0.00251789
30	1996630		1.00008	2045240		0.997178	2006090		0.997151	0.998135	0.00168121
33	1995180		0.99935	2049260		0.999138	2010550		0.999368	0.999286	0.000127941
36	1987530		0.995519	2039920		0.994584	2006870		0.997539	0.995881	0.00151023
39	1988700		0.996105	2038310		0.993799	2007330		0.997768	0.995891	0.00199276
42	1990150		0.996831	2038310		0.993799	2005180		0.996699	0.995776	0.00171341
45	1988250		0.995879	2033510		0.991459	2002240		0.995238	0.994192	0.00238837
48	1980450		0.991972	2034300		0.991844	1992360		0.990327	0.991381	0.000915419
51	1987410		0.995459	2043050		0.99611	1996250		0.99226	0.99461	0.00206067
54	1987150		0.995328	2030720		0.990099	2010400		0.999294	0.994907	0.00461186
57	1983160		0.99333	2048810		0.998919	2001070		0.994656	0.995635	0.00292028
60	1765480		0.884298	1758220		0.857239	1743330		0.866543	0.86936	0.0137477
63	1487630		0.745128	1522840		0.742477	1508890		0.750012	0.745872	0.00382248
66	1337980		0.670171	1365510		0.665769	1349040		0.670557	0.668832	0.00265985
69	1219810		0.610981	1262250		0.615423	1228600		0.610691	0.612365	0.0026525
72	1132320		0.567159	1167260		0.56911	1152340		0.572785	0.569684	0.00285644
75	1074000		0.537948	1109460		0.540929	1085370		0.539496	0.539458	0.00149102
78	1029430		0.515623	1056240		0.514981	1038030		0.515965	0.515523	0.000499813
81	993220		0.497486	1025780		0.50013	994950		0.494552	0.497389	0.00279019
84	967010		0.484358	984510		0.480008	975960		0.485113	0.48316	0.00275525
87	942750		0.472207	974650		0.475201	954170		0.474282	0.473896	0.00153376
90	929020		0.46533	951730		0.464026	938160		0.466324	0.465226	0.00115239
93	918470		0.460045	947830		0.462124	924740		0.459653	0.460608	0.00132813
96	908780		0.455192	932220		0.454514	916510		0.455562	0.455089	0.000531838
99	897160		0.449372	924540		0.450769	910630		0.45264	0.450927	0.00163974
102	891190		0.446381	924730		0.450862	904190		0.449439	0.448894	0.00228939
105	885090		0.443326	914900		0.446069	896700		0.445716	0.445037	0.00149224
108	888840		0.445204	904490		0.440994	895140		0.44494	0.443713	0.00235848
111	873940		0.437741	899230		0.438429	884820		0.439811	0.43866	0.0010539
114	879600		0.440576	900830		0.439209	887960		0.441371	0.440385	0.0010936
117	866400		0.433964	896890		0.437288	879720		0.437275	0.436176	0.0019153
120	875070		0.438307	900230		0.438917	876960		0.435904	0.437709	0.00159303
123	866330		0.433929	888370		0.433134	876000		0.435426	0.434163	0.00116391
126	868410		0.434971	885880		0.43192	875190		0.435024	0.433972	0.00177693
129	866230		0.433879	885010		0.431496	867380		0.431142	0.432172	0.00148885
132	861710		0.431615	882240		0.430145	868370		0.431634	0.431131	0.000854056
135	857300		0.429406	880440		0.429268	864930		0.429924	0.429533	0.000345836
138	853470		0.427488	881700		0.429882	865420		0.430167	0.429179	0.00147154
141	851280		0.426391	873390		0.42583	854970		0.424973	0.425732	0.000714099
144	854780		0.428144	874030		0.426143	858930		0.426942	0.427076	0.00100759
147	848010		0.424753	879530		0.428824	856290		0.425629	0.426402	0.00214267
150	847620		0.424558	875650		0.426932	849120		0.422065	0.424519	0.00243372
153	847900		0.424698	865420		0.421945	848580		0.421797	0.422813	0.00163402
156	846210		0.423852	867570		0.422993	850440		0.422722	0.423189	0.000589948
159	849060		0.425279	865650		0.422057	855310		0.425142	0.424159	0.0018222
162	840290		0.420886	867950		0.423178	853410		0.424198	0.422754	0.00169593
165	841680		0.421583	862010		0.420282	850810		0.422905	0.42159	0.00131171
168	840240		0.420861	862980		0.420755	846860		0.420942	0.420853	9.38236e-05
171	835210		0.418342	853880		0.416318	847250		0.421136	0.418599	0.0024191
174	837350		0.419414	861500		0.420033	841090		0.418074	0.419174	0.00100152
177	832780		0.417125	860180		0.41939	840190		0.417627	0.418047	0.00118961
180	835680		0.418577	855680		0.417196	840950		0.418004	0.417926	0.000694118
183	830230		0.415848	852140		0.41547	835390		0.415241	0.415519	0.000306416
186	831620		0.416544	853070		0.415923	840970		0.418014	0.416827	0.00107396
189	826670		0.414064	849950		0.414402	828930		0.41203	0.413499	0.00128335
192	823450		0.412452	844950		0.411964	835300		0.415196	0.413204	0.0017423
195	826410		0.413934	848510		0.4137	833030		0.414068	0.413901	0.000186128
198	824620		0.413038	846650		0.412793	834930		0.415012	0.413614	0.00121671
201	819210		0.410328	847540		0.413227	831560		0.413337	0.412297	0.0017065
204	826010		0.413734	843010		0.411018	833700		0.414401	0.413051	0.00179156
207	823120		0.412286	840820		0.409951	827890		0.411513	0.41125	0.00118979
210	817860		0.409652	842220		0.410633	829950		0.412537	0.410941	0.00146689
213	818220		0.409832	844800		0.411891	822400		0.408784	0.410169	0.0015808
216	818400		0.409922	837060		0.408117	825630		0.410389	0.409476	0.00119981
219	816140		0.40879	841780		0.410419	823540		0.409351	0.40952	0.000827382
222	814080		0.407758	833730		0.406494	821090		0.408133	0.407462	0.000858787
225	817640		0.409541	839530		0.409322	825960		0.410553	0.409806	0.000656973
228	815320		0.408379	833410		0.406338	821070		0.408123	0.407613	0.00111205
231	815490		0.408465	831290		0.405304	818070		0.406632	0.4068	0.00158689
234	815920		0.40868	835270		0.407245	816030		0.405618	0.407181	0.00153215
237	807760		0.404593	826420		0.40293	815880		0.405543	0.404355	0.00132274
240	812060		0.406746	832300		0.405797	822980		0.409072	0.407205	0.00168525
243	811400		0.406416	824080		0.401789	815940		0.405573	0.404593	0.00246438
246	810750		0.40609	825340		0.402403	813320		0.404271	0.404255	0.00184362
249	800180		0.400796	827450		0.403432	814820		0.405016	0.403081	0.00213181
252	803260		0.402339	827190		0.403305	818410		0.406801	0.404148	0.00234736
255	801960		0.401688	822090		0.400819	810990		0.403112	0.401873	0.00115807
258	799370		0.40039	822040		0.400794	809900		0.402571	0.401252	0.00115992
261	802460		0.401938	826780		0.403105	804130		0.399703	0.401582	0.00172908
264	802230		0.401823	821410		0.400487	809680		0.402461	0.40159	0.00100741
267	803480		0.402449	825000		0.402237	802580		0.398932	0.401206	0.00197221
270	797480		0.399444	814770		0.39725	804770		0.400021	0.398905	0.00146201
273	799200		0.400305	814880		0.397303	806810		0.401035	0.399548	0.00197764
276	799970		0.400691	815960		0.39783	802720		0.399002	0.399174	0.00143825
279	793990		0.397696	816300		0.397996	799090		0.397197	0.39763	0.000403212
282	798030		0.399719	818790		0.39921	804370		0.399822	0.399584	0.000327837
285	800130		0.400771	817720		0.398688	803910		0.399593	0.399684	0.00104446
288	794050		0.397726	809390		0.394627	797440		0.396377	0.396243	0.00155384
291	794530		0.397966	806820		0.393374	805080		0.400175	0.397171	0.00346952
294	787410		0.3944	812630		0.396206	803340		0.39931	0.396639	0.00248346
297	792280		0.396839	810610		0.395221	800000		0.39765	0.39657	0.00123628
300	794790		0.398096	817980		0.398815	799410		0.397356	0.398089	0.000729184
303	793430		0.397415	811800		0.395802	795290		0.395309	0.396175	0.00110179
306	786540		0.393964	807010		0.393466	797150		0.396233	0.394554	0.00147491
309	786640		0.394014	800720		0.390399	798680		0.396994	0.393802	0.00330216
312	785460		0.393423	805580		0.392769	793610		0.394473	0.393555	0.000859886
315	790460		0.395927	806140		0.393042	789670		0.392515	0.393828	0.00183701
318	778100		0.389737	800550		0.390317	792290		0.393817	0.39129	0.00220775
321	781390		0.391384	806560		0.393247	782610		0.389006	0.391212	0.00212574
324	782670		0.392026	802780		0.391404	791160		0.393256	0.392228	0.000942429
327	787710		0.39455	803120		0.39157	791910		0.393628	0.393249	0.00152594
330	777940		0.389656	803040		0.391531	786670		0.391024	0.390737	0.000969486
333	780250		0.390813	795350		0.387781	788480		0.391924	0.390173	0.00214418
336	782610		0.391996	800690		0.390385	781660		0.388534	0.390305	0.00173236
339	781940		0.39166	800790		0.390434	782000		0.388703	0.390265	0.00148583
342	779810		0.390593	802780		0.391404	791870		0.393609	0.391868	0.00156055
345	776840		0.389105	796290		0.38824	783850		0.389622	0.388989	0.000698601
348	772020		0.386691	796480		0.388332	787080		0.391228	0.38875	0.00229697
351	776290		0.38883	794930		0.387576	780050		0.387733	0.388047	0.000682925
354	774350		0.387858	795410		0.38781	782670		0.389036	0.388235	0.000693952
357	771440		0.386401	789100		0.384734	786400		0.39089	0.387341	0.00318384
360	767420		0.384387	793640		0.386948	779090		0.387256	0.386197	0.00157492
363	773080		0.387222	791310		0.385812	781590		0.388499	0.387177	0.00134419
366	772690		0.387027	795430		0.38782	781400		0.388404	0.38775	0.000691442
369	770060		0.385709	792410		0.386348	777650		0.38654	0.386199	0.000434943
372	773110		0.387237	781180		0.380873	783260		0.389329	0.385813	0.00440442
375	769930		0.385644	788420		0.384402	780110		0.387763	0.385937	0.0016993
378	763090		0.382218	788080		0.384237	775550		0.385497	0.383984	0.00165369
381	765760		0.383556	780730		0.380653	776070		0.385755	0.383321	0.002559
384	767210		0.384282	787620		0.384012	775650		0.385546	0.384614	0.000818917
387	761410		0.381377	782200		0.38137	772620		0.38404	0.382262	0.00153969
390	761660		0.381502	784760		0.382618	773380		0.384418	0.382846	0.00147125
393	764370		0.382859	782850		0.381687	772480		0.383971	0.382839	0.00114204
396	758970		0.380155	788730		0.384554	772900		0.384179	0.382963	0.00243888
399	764880		0.383115	780810		0.380692	768800		0.382141	0.381983	0.00121913
402	762970		0.382158	778210		0.379424	767770		0.381629	0.381071	0.00144997

## Sheet: rXKR9 cleaved lip.
rXKR9 cleaved lip.
	Measurement 1			Measurement 2			Measurement 3			Average	Std.Dev
time [s]	F	Fmax	F/Fmax	F	Fmax	F/Fmax	F	Fmax	F/Fmax	F/Fmax
0	1644550	1.62908e+06	1.0095	1633320	1618581	1.00911	1634890	1.62244e+06	1.00767	1.08799e+06	0.000961844
3	1637890		1.00541	1621670		1.00191	1648290		1.01593	824146	0.00729772
6	1644390		1.0094	1636070		1.01081	1645140		1.01399	822571	0.00235117
9	1629500		1.00026	1617950		0.99961	1634830		1.00763	817416	0.00445691
12	1631830		1.00169	1631680		1.00809	1637230		1.00911	818616	0.00402391
15	1634340		1.00323	1629840		1.00696	1623240		1.00049	811621	0.00324539
18	1638940		1.00605	1630300		1.00724	1634830		1.00763	817416	0.000822384
21	1628630		0.999725	1621550		1.00183	1624330		1.00116	812166	0.00107736
24	1623910		0.996828	1618070		0.999684	1622360		0.999948	811181	0.00173023
27	1629750		1.00041	1616020		0.998418	1622690		1.00015	811346	0.00108427
30	1627700		0.999154	1619330		1.00046	1618110		0.997328	809055	0.00157428
33	1627480		0.999019	1612380		0.996169	1621590		0.999473	810795	0.00179123
36	1628660		0.999744	1608050		0.993494	1620630		0.998882	810315	0.00338713
39	1616340		0.992181	1611610		0.995693	1622490		1.00003	811245	0.00393063
42	1629280		1.00012	1611780		0.995798	1611400		0.993193	805700	0.00350122
45	1620180		0.994538	1609380		0.994315	1611480		0.993242	805740	0.000693105
48	1619110		0.993882	1609520		0.994402	1607130		0.990561	803565	0.00208371
51	1621050		0.995072	1607920		0.993413	1608590		0.991461	804295	0.00180781
54	1616510		0.992286	1613050		0.996583	1600560		0.986511	800280	0.00505372
57	1631510		1.00149	1612130		0.996014	1599080		0.985599	799540	0.00807374
60	1437930		0.882665	1457080		0.900221	1379140		0.850038	689570	0.0254656
63	1215070		0.745864	1238740		0.765325	1201810		0.74074	600905	0.0129703
66	1083970		0.665389	1103560		0.681807	1071820		0.66062	535910	0.0111143
69	985640		0.60503	1003700		0.620111	982750		0.605722	491375	0.00851453
72	919950		0.564706	929730		0.574411	907780		0.559514	453890	0.00756143
75	864110		0.530429	884170		0.546262	857510		0.52853	428755	0.00973616
78	822810		0.505077	837160		0.517218	811650		0.500264	405825	0.00873734
81	793260		0.486938	799060		0.493679	781420		0.481631	390710	0.00603825
84	774570		0.475465	778090		0.480724	761450		0.469323	380725	0.00570615
87	756410		0.464318	757640		0.468089	741500		0.457026	370750	0.00562389
90	743180		0.456197	744430		0.459928	723880		0.446166	361940	0.00711693
93	733110		0.450015	732560		0.452594	720110		0.443843	360055	0.00449701
96	732730		0.449782	727410		0.449412	708880		0.436921	354440	0.00732095
99	714210		0.438414	713350		0.440726	696960		0.429574	348480	0.00588561
102	708480		0.434896	708530		0.437748	692730		0.426967	346365	0.00558619
105	703310		0.431723	705740		0.436024	687330		0.423639	343665	0.00628825
108	702650		0.431318	698180		0.431353	690880		0.425827	345440	0.00318058
111	697010		0.427856	698990		0.431854	679170		0.418609	339585	0.00679337
114	689810		0.423436	690580		0.426658	679830		0.419016	339915	0.00383653
117	693030		0.425413	690800		0.426794	673940		0.415386	336970	0.00622617
120	691410		0.424418	686650		0.42423	673150		0.414899	336575	0.00544248
123	686980		0.421699	687760		0.424915	670100		0.413019	335050	0.00615386
126	686180		0.421208	686950		0.424415	668790		0.412211	334395	0.00632653
129	685970		0.421079	688530		0.425391	664110		0.409327	332055	0.00831433
132	682090		0.418697	681070		0.420782	662630		0.408415	331315	0.0066211
135	677590		0.415935	672500		0.415487	660270		0.40696	330135	0.0050574
138	677430		0.415837	673740		0.416253	661010		0.407416	330505	0.00498628
141	683370		0.419483	674490		0.416717	659330		0.406381	329665	0.00690598
144	682000		0.418642	671020		0.414573	660140		0.40688	330070	0.00597333
147	674380		0.413964	667970		0.412689	652560		0.402208	326280	0.00645093
150	675150		0.414437	673250		0.415951	656820		0.404834	328410	0.00602923
153	672490		0.412804	669260		0.413486	652400		0.402109	326200	0.00638052
156	668400		0.410294	663760		0.410088	655260		0.403872	327630	0.00364945
159	672150		0.412595	665550		0.411194	652620		0.402245	326310	0.00561513
162	667000		0.409434	662380		0.409235	648480		0.399693	324240	0.00556736
165	666010		0.408826	661500		0.408691	649170		0.400118	324585	0.00498901
168	662590		0.406727	660240		0.407913	646020		0.398177	323010	0.00531193
171	663330		0.407181	658220		0.406665	642860		0.396229	321430	0.00617949
174	658040		0.403934	660370		0.407993	644060		0.396969	322030	0.00557562
177	666980		0.409422	657000		0.405911	642550		0.396038	321275	0.0069393
180	658650		0.404309	656400		0.40554	640150		0.394559	320075	0.00601616
183	654950		0.402037	653480		0.403736	639460		0.394134	319730	0.00512456
186	655260		0.402228	655840		0.405194	638430		0.393499	319215	0.00607976
189	654340		0.401663	650710		0.402025	638010		0.39324	319005	0.00497081
192	652000		0.400227	645360		0.39872	635980		0.391989	317990	0.00438626
195	649090		0.39844	655710		0.405114	631030		0.388938	315515	0.00812926
198	652980		0.400828	650130		0.401667	637890		0.393166	318945	0.00468458
201	650060		0.399036	646300		0.3993	630260		0.388463	315130	0.00618184
204	646820		0.397047	646110		0.399183	631930		0.389493	315965	0.00509142
207	648130		0.397851	642050		0.396675	630400		0.38855	315200	0.00506488
210	647790		0.397642	645300		0.398683	629230		0.387828	314615	0.00598898
213	650280		0.399171	644600		0.39825	628130		0.38715	314065	0.00669003
216	644750		0.395776	638670		0.394586	626430		0.386103	313215	0.00527523
219	641350		0.393689	644390		0.39812	626310		0.386029	313155	0.0061173
222	640770		0.393333	640570		0.39576	626690		0.386263	313345	0.00493423
225	643880		0.395242	641940		0.396607	629230		0.387828	314615	0.00472377
228	641220		0.393609	638630		0.394562	626320		0.386035	313160	0.00467239
231	647240		0.397305	642480		0.39694	622720		0.383816	311360	0.0076847
234	643510		0.395015	638020		0.394185	621800		0.383249	310900	0.00656665
237	642810		0.394585	634380		0.391936	625580		0.385579	312790	0.00462876
240	637220		0.391154	634480		0.391998	617580		0.380648	308790	0.00632334
243	635450		0.390067	635980		0.392924	621740		0.383212	310870	0.00499156
246	634800		0.389668	626870		0.387296	616390		0.379914	308195	0.00508687
249	637930		0.39159	632870		0.391003	617790		0.380777	308895	0.00608027
252	635710		0.390227	629000		0.388612	612740		0.377665	306370	0.00683451
255	634410		0.389429	631780		0.39033	621000		0.382756	310500	0.00413733
258	633070		0.388606	629030		0.388631	613220		0.377961	306610	0.00615338
261	638190		0.391749	627260		0.387537	615560		0.379403	307780	0.00627621
264	631100		0.387397	626540		0.387092	614110		0.378509	307055	0.00504578
267	632670		0.388361	625600		0.386511	609230		0.375501	304615	0.00695237
270	629520		0.386427	631130		0.389928	611320		0.376789	305660	0.00680395
273	626320		0.384463	629230		0.388754	610650		0.376377	305325	0.00628503
276	627130		0.38496	624090		0.385578	606160		0.373609	303080	0.00673915
279	629050		0.386139	621490		0.383972	609330		0.375563	304665	0.00558656
282	628160		0.385592	625740		0.386598	608210		0.374873	304105	0.00649883
285	629740		0.386562	624240		0.385671	603420		0.37192	301710	0.00820844
288	625840		0.384168	617510		0.381513	603180		0.371772	301590	0.0065268
291	622990		0.382419	620940		0.383632	606740		0.373967	303370	0.00526531
294	620730		0.381032	619330		0.382638	602960		0.371637	301480	0.00594225
297	624890		0.383585	620740		0.383509	603340		0.371871	301670	0.00674126
300	623460		0.382707	619800		0.382928	605610		0.37327	302805	0.00551342
303	625030		0.383671	616850		0.381105	601060		0.370466	300530	0.00700204
306	623100		0.382486	616300		0.380766	601590		0.370792	300795	0.00631372
309	619960		0.380559	616210		0.38071	603210		0.371791	301605	0.00510644
312	621680		0.381615	614080		0.379394	598500		0.368888	299250	0.00679813
315	617770		0.379215	612660		0.378517	597100		0.368025	298550	0.00626864
318	617730		0.37919	614130		0.379425	597210		0.368093	298605	0.00647593
321	617590		0.379104	613390		0.378968	594340		0.366324	297170	0.00733969
324	616970		0.378724	610220		0.377009	599270		0.369362	299635	0.00498404
327	617330		0.378945	612350		0.378325	598060		0.368617	299030	0.00579232
330	616180		0.378239	611470		0.377782	592980		0.365486	296490	0.00723465
333	611870		0.375593	613280		0.3789	597790		0.36845	298895	0.00534085
336	617630		0.379129	611610		0.377868	601070		0.370472	300535	0.00467678
339	611720		0.375501	603740		0.373006	592840		0.365399	296420	0.00526192
342	613650		0.376686	609460		0.37654	592120		0.364955	296060	0.00673066
345	615550		0.377852	605930		0.374359	588860		0.362946	294430	0.00779562
348	611600		0.375427	608440		0.37591	588860		0.362946	294430	0.00734912
351	607200		0.372726	607150		0.375113	589830		0.363544	294915	0.00610789
354	610510		0.374758	611560		0.377837	590650		0.364049	295325	0.00723713
357	612210		0.375802	603220		0.372684	589070		0.363076	294535	0.00663324
360	610930		0.375016	608480		0.375934	588190		0.362533	294095	0.00748609
363	609680		0.374249	600880		0.371239	588170		0.362521	294085	0.00609099
366	605330		0.371578	606630		0.374791	588670		0.362829	294335	0.00619096
369	602730		0.369982	602660		0.372338	587680		0.362219	293840	0.00529513
372	609180		0.373942	601550		0.371653	587350		0.362015	293675	0.00632918
375	609440		0.374101	600410		0.370948	584540		0.360284	292270	0.00724122
378	604160		0.37086	603150		0.372641	583290		0.359513	291645	0.0071213
381	601400		0.369166	598440		0.369731	583820		0.35984	291910	0.00555489
384	604210		0.370891	604030		0.373185	585250		0.360721	292625	0.00663366
387	603160		0.370246	603050		0.372579	583560		0.359679	291780	0.00687399
390	601340		0.369129	599880		0.370621	582700		0.359149	291350	0.0062372
393	600430		0.368571	594490		0.367291	582030		0.358736	291015	0.00534672
396	599040		0.367717	594160		0.367087	579990		0.357479	289995	0.00573773
399	597200		0.366588	594740		0.367445	584040		0.359975	292020	0.00408781
402	602660		0.369939	595650		0.368008	580230		0.357627	290115	0.00662171

## Sheet: rXKR9 cleaved buf.
rXKR9 cleaved buf.
	Measurement 1			Measurement 2			Measurement 3			Average	Std.Dev
time [s]	F	Fmax	F/Fmax	F	Fmax	F/Fmax	F	Fmax	F/Fmax	F/Fmax
0	2800180	2777081	1.00832	2773150	2.75066e+06	1.00818	2699990	2.68281e+06	1.0064	2.18835e+06	0.00106751
3	2785790		1.00314	2778610		1.01016	2706450		1.00881	1.7653e+06	0.00372842
6	2797620		1.0074	2760050		1.00342	2692140		1.00348	1.75736e+06	0.00228064
9	2791670		1.00525	2766140		1.00563	2691750		1.00333	1.75458e+06	0.00123262
12	2791970		1.00536	2759100		1.00307	2701030		1.00679	1.75982e+06	0.00187681
15	2793710		1.00599	2762580		1.00434	2691510		1.00324	1.75157e+06	0.00138247
18	2792160		1.00543	2756610		1.00216	2700210		1.00648	1.75881e+06	0.00225227
21	2787240		1.00366	2750000		0.999762	2684960		1.0008	1.74856e+06	0.00201775
24	2778210		1.00041	2751250		1.00022	2680940		0.999302	1.74606e+06	0.000590445
27	2783550		1.00233	2757440		1.00247	2684800		1.00074	1.74807e+06	0.0009592
30	2772960		0.998516	2747850		0.99898	2688240		1.00202	1.74865e+06	0.001905
33	2766860		0.99632	2750160		0.99982	2673920		0.996685	1.74236e+06	0.00192402
36	2773310		0.998642	2745550		0.998144	2688220		1.00202	1.74927e+06	0.0021063
39	2766620		0.996233	2749350		0.999525	2673540		0.996544	1.74239e+06	0.00181778
42	2763130		0.994976	2727560		0.991604	2659870		0.991448	1.73279e+06	0.0019936
45	2756750		0.992679	2739070		0.995788	2681960		0.999682	1.74385e+06	0.00350894
48	2761130		0.994256	2743390		0.997359	2668040		0.994494	1.7358e+06	0.00172673
51	2766550		0.996208	2733810		0.993876	2667520		0.9943	1.73591e+06	0.00124224
54	2760490		0.994026	2731170		0.992916	2659380		0.991266	1.72983e+06	0.00138882
57	2751720		0.990868	2730270		0.992589	2661780		0.99216	1.73066e+06	0.000895966
60	2462970		0.886892	2402510		0.873432	2302060		0.858077	1.49582e+06	0.0144177
63	2125660		0.76543	2069210		0.752261	2034110		0.758201	1.31751e+06	0.00659496
66	1879290		0.676714	1845760		0.671026	1807410		0.6737	1.17166e+06	0.00284602
69	1711130		0.616161	1672960		0.608204	1637850		0.610497	1.06461e+06	0.00409588
72	1571040		0.565716	1548300		0.562884	1506880		0.561679	980385	0.0020725
75	1475560		0.531335	1453350		0.528365	1430450		0.53319	929603	0.00243409
78	1411220		0.508167	1380090		0.501731	1360380		0.507072	883103	0.0034433
81	1348220		0.485481	1327280		0.482532	1297500		0.483634	844105	0.00148995
84	1304910		0.469885	1287670		0.468132	1252170		0.466738	816448	0.00157725
87	1272690		0.458283	1255100		0.456291	1226760		0.457266	798755	0.000996133
90	1250400		0.450257	1230590		0.447381	1202530		0.448235	782235	0.00147715
93	1225100		0.441147	1208800		0.439459	1180410		0.43999	770233	0.00086302
96	1206050		0.434287	1194060		0.4341	1169720		0.436005	762080	0.00105007
99	1198070		0.431413	1191780		0.433271	1152800		0.429698	750640	0.00178695
102	1186870		0.42738	1177200		0.427971	1154200		0.43022	750283	0.00149848
105	1179470		0.424716	1163570		0.423016	1141590		0.42552	742628	0.0012786
108	1177800		0.424114	1162720		0.422707	1144580		0.426634	745010	0.00198999
111	1167960		0.420571	1155380		0.420038	1132350		0.422076	735968	0.00105673
114	1159810		0.417636	1150890		0.418406	1123610		0.418818	731763	0.000599718
117	1153170		0.415245	1147660		0.417231	1123590		0.41881	730280	0.00178643
120	1154450		0.415706	1145290		0.41637	1114400		0.415385	725488	0.000502249
123	1146190		0.412732	1140180		0.414512	1113870		0.415187	724460	0.0012685
126	1144740		0.41221	1135620		0.412854	1117290		0.416462	725843	0.00229184
129	1148600		0.4136	1131220		0.411255	1110940		0.414095	721498	0.00151733
132	1141250		0.410953	1130930		0.411149	1112790		0.414785	722053	0.00215787
135	1137180		0.409488	1119870		0.407128	1101520		0.410584	715828	0.00176584
138	1137490		0.409599	1124010		0.408634	1100820		0.410323	715663	0.000847683
141	1134100		0.408378	1119730		0.407078	1102070		0.410789	715868	0.00188321
144	1135790		0.408987	1124930		0.408968	1098170		0.409335	714120	0.000206836
147	1129880		0.406859	1119080		0.406841	1093230		0.407494	709755	0.000371901
150	1126610		0.405681	1118360		0.406579	1091300		0.406775	709855	0.000583072
153	1128930		0.406517	1118850		0.406758	1093240		0.407498	709720	0.00051122
156	1116440		0.402019	1114220		0.405074	1089440		0.406081	708535	0.00211534
159	1123420		0.404533	1109050		0.403195	1084400		0.404203	705355	0.000696971
162	1116360		0.40199	1111430		0.40406	1088210		0.405623	706225	0.00182208
165	1109710		0.399596	1105440		0.401882	1085080		0.404456	704833	0.00243157
168	1114380		0.401277	1109740		0.403446	1078040		0.401832	700525	0.00112638
171	1110970		0.40005	1095920		0.398421	1081930		0.403282	701680	0.00247404
174	1109150		0.399394	1103820		0.401293	1085340		0.404553	703685	0.00260916
177	1104790		0.397824	1098520		0.399367	1083940		0.404031	702608	0.00323174
180	1113280		0.400881	1097580		0.399025	1074350		0.400457	697213	0.000972687
183	1104820		0.397835	1100550		0.400105	1072410		0.399733	696070	0.00121746
186	1098130		0.395426	1091730		0.396898	1076810		0.401374	698013	0.00309759
189	1100330		0.396218	1089040		0.39592	1074470		0.400501	696738	0.00256324
192	1098340		0.395502	1091880		0.396953	1065470		0.397147	691730	0.000899012
195	1092950		0.393561	1090320		0.396386	1073410		0.400106	694463	0.00328296
198	1102970		0.397169	1093260		0.397454	1064000		0.396599	691473	0.000435633
201	1096930		0.394994	1092950		0.397342	1065320		0.397091	690225	0.00128917
204	1099790		0.396024	1084710		0.394346	1068390		0.398235	692178	0.00195062
207	1100140		0.39615	1080360		0.392765	1053550		0.392704	684375	0.0019723
210	1094360		0.394068	1085780		0.394735	1063970		0.396588	689293	0.00130525
213	1095710		0.394555	1082850		0.39367	1058120		0.394407	686093	0.000473998
216	1081550		0.389456	1077880		0.391863	1050640		0.391619	681928	0.00132501
219	1085240		0.390784	1079730		0.392536	1062480		0.396032	687818	0.00267181
222	1087130		0.391465	1081450		0.393161	1061170		0.395544	687258	0.00204906
225	1084700		0.39059	1075340		0.39094	1057240		0.394079	685928	0.00192143
228	1085580		0.390907	1078550		0.392107	1055010		0.393248	684085	0.00117057
231	1089040		0.392153	1073250		0.39018	1052330		0.392249	681845	0.00116785
234	1078360		0.388307	1068970		0.388624	1055770		0.393531	683335	0.00292895
237	1086090		0.391091	1073860		0.390401	1052970		0.392487	682880	0.00106277
240	1083910		0.390306	1067530		0.3881	1048840		0.390948	678815	0.00149362
243	1084730		0.390601	1070450		0.389162	1047290		0.39037	679080	0.000772885
246	1070690		0.385545	1071510		0.389547	1043570		0.388984	675883	0.00216629
249	1069530		0.385127	1064970		0.38717	1044790		0.389438	676843	0.00215645
252	1071170		0.385718	1064810		0.387111	1046830		0.390199	676600	0.00229313
255	1072970		0.386366	1070000		0.388998	1042330		0.388521	676415	0.0014024
258	1074380		0.386874	1064080		0.386846	1045380		0.389658	675995	0.00161568
261	1070770		0.385574	1063890		0.386777	1043760		0.389054	675770	0.00176767
264	1067870		0.38453	1060560		0.385566	1045030		0.389528	676043	0.00263785
267	1065820		0.383791	1063720		0.386715	1040630		0.387888	672623	0.00210957
270	1070540		0.385491	1065860		0.387493	1040710		0.387918	673185	0.00129587
273	1066440		0.384015	1052000		0.382454	1038600		0.387131	671963	0.00238112
276	1066330		0.383975	1060480		0.385537	1039320		0.387399	671200	0.00171434
279	1068110		0.384616	1056370		0.384043	1039640		0.387519	672153	0.00186342
282	1059140		0.381386	1057180		0.384337	1038720		0.387176	671413	0.00289504
285	1066100		0.383892	1058700		0.38489	1035210		0.385867	668460	0.000987591
288	1063590		0.382988	1055540		0.383741	1035410		0.385942	668500	0.00153478
291	1062380		0.382553	1057570		0.384479	1030840		0.384239	667105	0.0010497
294	1061880		0.382373	1057650		0.384508	1028790		0.383474	665135	0.001068
297	1062060		0.382438	1058360		0.384766	1033650		0.385286	667660	0.00151698
300	1055020		0.379902	1051560		0.382294	1037840		0.386848	670323	0.00352825
303	1052900		0.379139	1048890		0.381324	1029050		0.383571	664790	0.0022162
306	1054280		0.379636	1050150		0.381782	1025830		0.382371	663313	0.00143945
309	1053040		0.37919	1046820		0.380571	1023340		0.381443	662473	0.0011363
312	1050290		0.378199	1046560		0.380477	1027480		0.382986	663365	0.00239437
315	1049670		0.377976	1040360		0.378223	1029300		0.383665	663925	0.00321546
318	1045310		0.376406	1041660		0.378695	1015510		0.378524	657058	0.00127521
321	1038790		0.374058	1047570		0.380844	1021850		0.380888	659510	0.00393035
324	1048170		0.377436	1044440		0.379706	1022540		0.381145	661088	0.00186991
327	1048680		0.37762	1039380		0.377866	1017520		0.379274	658275	0.000892327
330	1045630		0.376521	1046010		0.380277	1023720		0.381585	660105	0.00262842
333	1049600		0.377951	1040010		0.378095	1015900		0.37867	657398	0.000380304
336	1043410		0.375722	1038650		0.377601	1022800		0.381242	661668	0.00280639
339	1045920		0.376626	1033300		0.375656	1015830		0.378644	656125	0.00152422
342	1045490		0.376471	1038590		0.377579	1018990		0.379822	657525	0.00170705
345	1045200		0.376366	1038890		0.377688	1013340		0.377716	653885	0.000771141
348	1040540		0.374688	1038190		0.377434	1015120		0.378379	654775	0.00191708
351	1038680		0.374019	1041100		0.378492	1015150		0.37839	655033	0.00255371
354	1040730		0.374757	1029630		0.374322	1017100		0.379117	656213	0.00265194
357	1033400		0.372117	1033190		0.375616	1008090		0.375759	651313	0.00206234
360	1038060		0.373795	1033320		0.375663	1008820		0.376031	651458	0.00119867
363	1040260		0.374588	1028870		0.374045	1004820		0.37454	649453	0.000300183
366	1031660		0.371491	1027840		0.373671	1008970		0.376087	651653	0.00229895
369	1035090		0.372726	1026870		0.373318	1010940		0.376821	652390	0.00221319
372	1033650		0.372207	1030060		0.374478	1007030		0.375364	650353	0.00162796
375	1026560		0.369654	1028110		0.373769	1006900		0.375315	649585	0.00292591
378	1027350		0.369939	1030940		0.374798	1005210		0.374685	648428	0.00277344
381	1033710		0.372229	1021450		0.371348	1003440		0.374025	647675	0.0013646
384	1034080		0.372362	1023530		0.372104	1006500		0.375166	649563	0.00169821
387	1023670		0.368614	1023000		0.371911	1004370		0.374372	648075	0.00288931
390	1028920		0.370504	1028450		0.373893	998290		0.372106	644820	0.00169512
393	1024320		0.368848	1026510		0.373187	1001310		0.373231	646163	0.00251833
396	1027910		0.37014	1021460		0.371351	1000070		0.372769	645033	0.00131576
399	1023520		0.36856	1023040		0.371926	996320		0.371371	644170	0.00180487
402	1029610		0.370753	1015490		0.369181	998510		0.372188	644313	0.00150385

## Sheet: mTMEM16F no Ca2+
TMEM16F no Ca2+
	Measurement 1			Measurement 2			Measurement 3			Average	Std.Dev
time [s]	F	Fmax	F/Fmax	F	Fmax	F/Fmax	F	Fmax	F/Fmax	F/Fmax
0	1802480	1815313	0.992931	1816340	1835658	0.989476	1798830	1.8084e+06	0.994706	0.991182	0.00265923
3	1801640		0.992468	1836830		1.00064	1792380		0.991139	0.99673	0.00514402
6	1807130		0.995492	1836370		1.00039	1803130		0.997083	0.996596	0.00249729
9	1808950		0.996495	1830920		0.997419	1797390		0.993909	0.996313	0.00181918
12	1811920		0.998131	1833470		0.998808	1799410		0.995026	0.997038	0.00201656
15	1815190		0.999932	1839850		1.00228	1797870		0.994175	1.00079	0.004172
18	1817060		1.00096	1830410		0.997141	1808670		1.00015	0.999808	0.00201254
21	1817680		1.0013	1828680		0.996199	1810790		1.00132	0.997311	0.00295193
24	1822170		1.00378	1836600		1.00051	1798330		0.994429	1.00119	0.00474448
27	1818290		1.00164	1834170		0.999189	1807120		0.99929	0.999907	0.00138677
30	1816790		1.00081	1835550		0.999941	1806400		0.998892	1.00213	0.000962394
33	1818350		1.00167	1832130		0.998078	1818590		1.00563	1.00067	0.00377858
36	1822380		1.00389	1834500		0.999369	1812500		1.00226	1.00179	0.00229131
39	1814760		0.999695	1836340		1.00037	1812210		1.0021	1.00121	0.00124251
42	1820440		1.00282	1830370		0.997119	1814830		1.00355	1.00014	0.00352308
45	1825360		1.00553	1839480		1.00208	1809290		1.00049	1.00608	0.00257898
48	1821590		1.00346	1847070		1.00622	1827630		1.01063	1.00343	0.00361839
51	1813060		0.998759	1840760		1.00278	1809530		1.00062	1.00213	0.00201203
54	1814540		0.999574	1839560		1.00213	1817160		1.00484	1.00382	0.00263412
57	1816480		1.00064	1853760		1.00986	1826030		1.00975	0.98403	0.00528942
60	1804370		0.993972	1689940		0.920618	1702770		0.941587	0.915878	0.0377815
63	1574750		0.867481	1501070		0.817729	1506480		0.833044	0.815618	0.0254815
66	1448510		0.79794	1378120		0.75075	1377360		0.761644	0.751006	0.024708
69	1331980		0.733747	1279550		0.697053	1273710		0.704328	0.696128	0.0194288
72	1247820		0.687386	1194440		0.650688	1189180		0.657585	0.653233	0.0195038
75	1175560		0.64758	1143100		0.622719	1124150		0.621625	0.621993	0.0146792
78	1112760		0.612985	1081970		0.589418	1077230		0.59568	0.589573	0.0122072
81	1067250		0.587915	1035960		0.564353	1024130		0.566317	0.567625	0.0130735
84	1027010		0.565748	1006330		0.548212	995720		0.550607	0.549142	0.00950881
87	1001520		0.551707	969650		0.52823	964720		0.533465	0.532717	0.0123241
90	968190		0.533346	951510		0.518348	937140		0.518214	0.519487	0.00869809
93	942560		0.519227	927730		0.505394	916440		0.506767	0.508505	0.00762133
96	928920		0.511713	915480		0.49872	905820		0.500895	0.500928	0.00695933
99	917660		0.505511	901430		0.491066	890370		0.492351	0.494647	0.00799435
102	898120		0.494747	892780		0.486354	881350		0.487363	0.48772	0.00458193
105	888910		0.489673	879130		0.478918	871760		0.48206	0.483003	0.00553017
108	880170		0.484859	870280		0.474097	868790		0.480418	0.478337	0.00540806
111	870670		0.479625	869330		0.47358	860900		0.476055	0.474612	0.00303936
114	866810		0.477499	860390		0.468709	851090		0.47063	0.472469	0.00462106
117	867860		0.478077	854490		0.465495	852120		0.4712	0.471086	0.00630017
120	858010		0.472651	855310		0.465942	849380		0.469685	0.468244	0.00336216
123	859810		0.473643	855750		0.466182	842970		0.46614	0.468115	0.00431975
126	853890		0.470382	852150		0.46422	840040		0.46452	0.465733	0.00347396
129	846990		0.466581	845070		0.460364	836560		0.462596	0.463895	0.0031495
132	850280		0.468393	848010		0.461965	840440		0.464741	0.465153	0.00322389
135	845370		0.465688	845110		0.460385	841090		0.465101	0.463258	0.0029069
138	848310		0.467308	844070		0.459819	838560		0.463702	0.462879	0.00374539
141	846880		0.46652	843270		0.459383	834600		0.461512	0.462112	0.0036641
144	845700		0.46587	847670		0.46178	832650		0.460433	0.462711	0.00283133
147	846770		0.46646	848400		0.462178	832740		0.460483	0.463066	0.00308007
150	843330		0.464565	841950		0.458664	832880		0.460561	0.461554	0.00301237
153	848260		0.46728	836610		0.455755	834460		0.461434	0.461864	0.00576293
156	838540		0.461926	838920		0.457013	836490		0.462557	0.45959	0.00303492
159	842030		0.463848	839280		0.457209	831560		0.459831	0.459599	0.0033439
162	841290		0.463441	846210		0.460985	827780		0.457741	0.461813	0.00285917
165	842360		0.46403	841910		0.458642	833700		0.461014	0.460574	0.00270045
168	840010		0.462736	841970		0.458675	830150		0.459051	0.459562	0.00224382
171	844650		0.465292	840380		0.457809	826940		0.457276	0.461077	0.00448201
174	835800		0.460416	843340		0.459421	832100		0.460129	0.459558	0.000512323
177	836360		0.460725	843110		0.459296	829760		0.458835	0.460021	0.000985299
180	834300		0.45959	836990		0.455962	831940		0.460041	0.459001	0.00223631
183	837340		0.461265	837060		0.456	834490		0.461451	0.45757	0.00309479
186	842160		0.46392	832960		0.453766	823630		0.455446	0.45843	0.00544256
189	839750		0.462592	834550		0.454633	827530		0.457602	0.458611	0.0040224
192	835710		0.460367	836140		0.455499	829350		0.458609	0.457812	0.00246513
195	839640		0.462532	833890		0.454273	827470		0.457569	0.457763	0.0041573
198	837840		0.46154	829530		0.451898	825510		0.456485	0.457096	0.00482306
201	838240		0.461761	838760		0.456926	827980		0.457851	0.458429	0.0025662
204	834840		0.459888	832070		0.453282	825720		0.456601	0.456515	0.00330303
207	833190		0.458979	829830		0.452061	825310		0.456375	0.454808	0.0034937
210	833740		0.459282	835400		0.455096	819900		0.453383	0.456755	0.0030345
213	834890		0.459915	831210		0.452813	824430		0.455888	0.456386	0.00356166
216	839280		0.462333	832800		0.453679	825410		0.45643	0.456382	0.00442179
219	833600		0.459205	833800		0.454224	819450		0.453134	0.455657	0.0032363
222	831540		0.45807	826270		0.450122	820190		0.453543	0.454621	0.00398668
225	834180		0.459524	834160		0.45442	824040		0.455672	0.45613	0.00265999
228	825920		0.454974	827040		0.450541	821820		0.454445	0.45346	0.00242083
231	831090		0.457822	826070		0.450013	822580		0.454865	0.454408	0.00394257
234	828200		0.45623	835160		0.454965	823530		0.45539	0.454957	0.000643664
237	833180		0.458973	835530		0.455166	820430		0.453676	0.456875	0.00273163
240	831090		0.457822	829940		0.452121	825510		0.456485	0.454975	0.00298128
243	832240		0.458455	828870		0.451538	822790		0.454981	0.454505	0.00345852
246	828360		0.456318	830760		0.452568	820150		0.453521	0.45404	0.00194906
249	827920		0.456076	829460		0.45186	819630		0.453234	0.454103	0.00215009
252	830310		0.457392	826240		0.450106	821690		0.454373	0.45328	0.00366105
255	828920		0.456626	824690		0.449261	818020		0.452343	0.453977	0.0036989
258	829070		0.456709	827920		0.451021	824710		0.456043	0.453232	0.0031097
261	828430		0.456357	828760		0.451478	817340		0.451967	0.453349	0.00268637
264	827390		0.455784	824750		0.449294	817780		0.452211	0.452557	0.00325039
267	824610		0.454252	825760		0.449844	818470		0.452592	0.451898	0.00222633
270	833850		0.459342	831750		0.453107	816670		0.451597	0.455036	0.00410581
273	826490		0.455288	826440		0.450215	818590		0.452659	0.451755	0.00253721
276	830760		0.45764	823430		0.448575	813350		0.449761	0.452073	0.00492721
279	825560		0.454776	820730		0.447104	813790		0.450004	0.451677	0.00387362
282	824870		0.454395	825030		0.449446	819480		0.453151	0.452196	0.00257436
285	827850		0.456037	826650		0.450329	818750		0.452747	0.452387	0.00286511
288	832040		0.458345	826260		0.450117	815220		0.450795	0.453786	0.00456754
291	828070		0.456158	831170		0.452791	819020		0.452896	0.452091	0.00191427
294	829740		0.457078	826560		0.45028	808940		0.447322	0.452091	0.00500228
297	824960		0.454445	824870		0.449359	811820		0.448915	0.451631	0.00307254
300	822220		0.452936	819980		0.446695	815750		0.451088	0.450161	0.00320548
303	828730		0.456522	821740		0.447654	815320		0.45085	0.451025	0.00449102
306	824900		0.454412	818720		0.446009	811790		0.448898	0.450077	0.00426923
309	827640		0.455921	818010		0.445622	813440		0.449811	0.450393	0.00517938
312	825060		0.4545	819290		0.44632	813120		0.449634	0.450081	0.00411476
315	821080		0.452308	823390		0.448553	812740		0.449424	0.449262	0.0019652
318	823960		0.453894	825500		0.449703	808220		0.446924	0.451132	0.00350872
321	825020		0.454478	820370		0.446908	813420		0.4498	0.449931	0.00382008
324	825250		0.454605	817210		0.445186	810900		0.448406	0.448953	0.00478705
327	824620		0.454258	819620		0.446499	808480		0.447068	0.449443	0.0043245
330	818230		0.450738	823000		0.448341	809390		0.447571	0.448953	0.00165145
333	822220		0.452936	818750		0.446025	809770		0.447781	0.448186	0.00359171
336	826450		0.455266	813880		0.443372	805820		0.445597	0.448128	0.00632307
339	826380		0.455227	815480		0.444244	806090		0.445747	0.448778	0.00595505
342	815510		0.449239	819980		0.446695	808110		0.446864	0.446722	0.00142269
345	818170		0.450705	818530		0.445906	803350		0.444231	0.448269	0.00336001
348	821220		0.452385	814360		0.443634	810520		0.448196	0.446249	0.00437681
351	818490		0.450881	816440		0.444767	800630		0.442727	0.446265	0.00424309
354	817590		0.450385	816060		0.44456	801390		0.443148	0.447461	0.00383647
357	816780		0.449939	809520		0.440997	809150		0.447439	0.4443	0.00461336
360	825130		0.454539	814540		0.443732	799250		0.441964	0.446503	0.00680723
363	816120		0.449575	810640		0.441607	797940		0.44124	0.444873	0.00471004
366	818830		0.451068	814860		0.443906	801910		0.443435	0.44687	0.00427748
369	815120		0.449024	807050		0.439652	805890		0.445636	0.444144	0.00474597
372	817890		0.45055	813260		0.443035	802490		0.443756	0.445826	0.00414677
375	816910		0.450011	812950		0.442866	802740		0.443894	0.444755	0.00386259
378	818530		0.450903	805460		0.438785	798210		0.441389	0.444334	0.0063787
381	815350		0.449151	809140		0.44079	801690		0.443313	0.444083	0.00428861
384	811920		0.447262	807310		0.439793	799870		0.442307	0.443987	0.00380013
387	812880		0.447791	807510		0.439902	804570		0.444906	0.444117	0.00399133
390	813110		0.447917	805940		0.439047	804120		0.444657	0.443059	0.00448675
393	809670		0.446022	810050		0.441286	799700		0.442213	0.442626	0.00251008
396	808790		0.445537	806370		0.439281	796730		0.440571	0.440923	0.00330337
399	804950		0.443422	805700		0.438916	791990		0.43795	0.440376	0.00292082
402	815580		0.449278	809740		0.441117	793510		0.43879	0.445197	0.00550769

## Sheet: mTMEM16F Ca2+
TMEM16F Ca2+
	Measurement 1			Measurement 2			Measurement 3			Average	Std.Dev
time [s]	F	Fmax	F/Fmax	F	Fmax	F/Fmax	F	Fmax	F/Fmax	F/Fmax
0	1709640	1710122	0.999718	1785570	1789669	0.99771	1781080	1.78192e+06	0.999529	0.999466	0.00110903
3	1681290		0.98314	1800480		1.00604	1783650		1.00097	0.99651	0.0120282
6	1713870		1.00219	1801000		1.00633	1782540		1.00035	1.00325	0.00306412
9	1703180		0.995941	1780390		0.994815	1784080		1.00121	0.99696	0.00341523
12	1709530		0.999654	1800510		1.00606	1782140		1.00012	1.00155	0.00356928
15	1706570		0.997923	1788480		0.999336	1780020		0.998934	0.999296	0.000727918
18	1706070		0.997631	1787820		0.998967	1783040		1.00063	0.998883	0.00150206
21	1705790		0.997467	1794180		1.00252	1782010		1.00005	0.999659	0.00252708
24	1710990		1.00051	1789060		0.99966	1780120		0.99899	0.999732	0.000760459
27	1702630		0.995619	1796520		1.00383	1780190		0.999029	0.998718	0.00412405
30	1708820		0.999239	1795480		1.00325	1776050		0.996706	1.00143	0.00329807
33	1711730		1.00094	1783880		0.996765	1785120		1.0018	1.00029	0.0026917
36	1707230		0.998309	1788830		0.999531	1787550		1.00316	0.998229	0.00252296
39	1719280		1.00536	1785790		0.997833	1776300		0.996846	1.00131	0.00465406
42	1714290		1.00244	1782380		0.995927	1783240		1.00074	0.999277	0.00337717
45	1708610		0.999116	1785480		0.997659	1780970		0.999467	0.998181	0.000958556
48	1710770		1.00038	1780510		0.994882	1777940		0.997767	0.998783	0.00274944
51	1719880		1.00571	1787390		0.998727	1783860		1.00109	1.00065	0.0035499
54	1718690		1.00501	1785620		0.997738	1777480		0.997509	1.00262	0.00426648
57	1733580		1.01372	1794010		1.00243	1791010		1.0051	0.987606	0.00590041
60	1658590		0.969866	1586590		0.886527	1686900		0.946676	0.886004	0.0430138
63	1359570		0.795013	1412680		0.789353	1428420		0.801619	0.765712	0.00613908
66	1218710		0.712645	1257930		0.702884	1270100		0.712771	0.686696	0.00567207
69	1082020		0.632715	1131870		0.632447	1148550		0.644558	0.618271	0.00691618
72	980440		0.573316	1032050		0.576671	1050710		0.589651	0.563711	0.00862707
75	896670		0.524331	944420		0.527707	964280		0.541147	0.516899	0.00889574
78	824070		0.481878	874220		0.488481	888570		0.498659	0.478926	0.00845369
81	766850		0.448418	814210		0.45495	831120		0.466418	0.446576	0.00911216
84	713840		0.417421	761720		0.425621	777560		0.436361	0.41708	0.00949854
87	673420		0.393785	714560		0.399269	727380		0.4082	0.395033	0.00727608
90	635150		0.371406	679260		0.379545	698590		0.392044	0.373089	0.0103951
93	606190		0.354472	644650		0.360206	656310		0.368316	0.356191	0.00695614
96	581590		0.340087	615650		0.344002	630610		0.353894	0.341381	0.0071157
99	549150		0.321117	594340		0.332095	605950		0.340055	0.326564	0.00950859
102	530620		0.310282	575060		0.321322	581760		0.326479	0.316071	0.00827484
105	513280		0.300142	554290		0.309716	564170		0.316608	0.304871	0.00826919
108	499230		0.291927	539060		0.301207	543050		0.304756	0.296415	0.00662445
111	483830		0.282921	521570		0.291434	527650		0.296113	0.288153	0.00668813
114	473490		0.276875	507980		0.28384	516940		0.290103	0.2821	0.00661706
117	461490		0.269858	495990		0.277141	508890		0.285585	0.274683	0.00787083
120	457040		0.267256	482570		0.269642	493680		0.27705	0.269928	0.00510691
123	444950		0.260186	479710		0.268044	486260		0.272886	0.265465	0.00640912
126	435930		0.254912	465340		0.260015	477850		0.268166	0.259484	0.00668529
129	439380		0.256929	463810		0.25916	469580		0.263525	0.258347	0.00335496
132	429420		0.251105	458610		0.256254	461430		0.258951	0.253592	0.00398645
135	421010		0.246187	449960		0.251421	451570		0.253418	0.250164	0.0037341
138	417230		0.243977	442580		0.247297	450620		0.252885	0.246824	0.00450175
141	410530		0.240059	436940		0.244146	444050		0.249198	0.244069	0.00457782
144	405870		0.237334	432270		0.241536	441920		0.248002	0.240581	0.00537402
147	408400		0.238813	432890		0.241883	432780		0.242873	0.240251	0.00211665
150	398750		0.23317	421650		0.235602	427760		0.240056	0.235593	0.00349174
153	392650		0.229604	423100		0.236412	424110		0.238007	0.234575	0.00446338
156	393160		0.229902	416320		0.232624	423580		0.23771	0.232086	0.00396329
159	390750		0.228492	417510		0.233289	416490		0.233731	0.231768	0.00290531
162	386200		0.225832	411440		0.229897	416120		0.233523	0.229042	0.0038479
165	384990		0.225124	408010		0.227981	412330		0.231397	0.227608	0.00314028
168	379290		0.221791	406240		0.226992	409340		0.229719	0.225277	0.0040275
171	381820		0.223271	403000		0.225181	404580		0.227047	0.224695	0.00188838
174	375930		0.219826	399180		0.223047	402060		0.225633	0.22263	0.0029091
177	376480		0.220148	396500		0.221549	400960		0.225016	0.22172	0.00250582
180	369510		0.216072	393600		0.219929	398190		0.223461	0.219097	0.00369567
183	373150		0.218201	390720		0.21832	394320		0.221289	0.219223	0.00174992
186	369010		0.21578	388660		0.217169	394070		0.221149	0.21712	0.00278692
189	363270		0.212423	390030		0.217934	389190		0.218411	0.216149	0.00332767
192	365820		0.213915	389080		0.217403	388620		0.218091	0.216202	0.00223919
195	367980		0.215178	386130		0.215755	387190		0.217288	0.216117	0.00109074
198	364130		0.212926	384110		0.214626	387420		0.217417	0.214133	0.00226743
201	361760		0.21154	377020		0.210665	382840		0.214847	0.211797	0.00220574
204	359370		0.210143	379390		0.211989	379880		0.213186	0.212394	0.00153296
207	356600		0.208523	373640		0.208776	383200		0.215049	0.209486	0.00369686
210	352000		0.205833	374770		0.209407	376270		0.21116	0.209023	0.00271475
213	354080		0.20705	369580		0.206507	377460		0.211828	0.208278	0.00292776
216	353800		0.206886	372700		0.208251	376480		0.211278	0.207619	0.00224778
219	351820		0.205728	372410		0.208089	370140		0.20772	0.207622	0.00126994
222	350710		0.205079	367760		0.205491	372510		0.20905	0.205969	0.00218351
225	348120		0.203564	367040		0.205088	369460		0.207338	0.204883	0.0018985
228	347790		0.203371	371110		0.207362	367070		0.205997	0.206469	0.00202834
231	345530		0.20205	364650		0.203753	371840		0.208674	0.203883	0.0034398
234	344700		0.201565	360240		0.201289	366800		0.205845	0.202617	0.00255495
237	347820		0.203389	364720		0.203792	365290		0.204998	0.203334	0.000837272
240	347670		0.203301	361730		0.202121	361410		0.202821	0.203219	0.000593425
243	343270		0.200728	361150		0.201797	363930		0.204235	0.202199	0.00179721
246	343970		0.201138	359340		0.200786	363640		0.204072	0.201394	0.00180437
249	339770		0.198682	357930		0.199998	360410		0.202259	0.200313	0.00180954
252	339200		0.198348	355450		0.198612	360410		0.202259	0.199046	0.00218586
255	340500		0.199109	358020		0.200048	356700		0.200177	0.200197	0.000583352
258	333820		0.195202	357460		0.199735	358940		0.201434	0.198523	0.00322159
261	338690		0.19805	348870		0.194935	357510		0.200632	0.197708	0.00285239
264	336760		0.196922	349040		0.19503	356630		0.200138	0.197128	0.00258232
267	333640		0.195097	350620		0.195913	355370		0.199431	0.196335	0.00230297
270	336970		0.197044	349870		0.195494	352810		0.197994	0.19746	0.001262
273	330380		0.193191	348670		0.194824	356100		0.199841	0.195071	0.00346544
276	330670		0.19336	348640		0.194807	351390		0.197197	0.195155	0.00193775
279	328250		0.191945	348850		0.194924	351570		0.197298	0.194745	0.00268224
282	327800		0.191682	349330		0.195193	351690		0.197366	0.194085	0.00286788
285	332250		0.194284	344140		0.192293	348150		0.195379	0.19407	0.0015649
288	328360		0.19201	347930		0.19441	348600		0.195632	0.194021	0.00184273
291	327250		0.191361	345120		0.19284	348620		0.195643	0.19368	0.00217498
294	324840		0.189951	342470		0.191359	350750		0.196838	0.191343	0.00363847
297	324760		0.189905	342000		0.191097	343410		0.192719	0.191938	0.00141275
300	327660		0.1916	344010		0.19222	347140		0.194812	0.191888	0.00170401
303	328160		0.191893	340240		0.190113	341850		0.191844	0.19141	0.00101346
306	323720		0.189296	342780		0.191533	342530		0.192225	0.191804	0.00153072
309	324060		0.189495	338140		0.18894	346730		0.194582	0.190013	0.00310973
312	327080		0.191261	338960		0.189398	341420		0.191602	0.190926	0.00118645
315	319800		0.187004	336960		0.188281	342340		0.192119	0.188961	0.002662
318	320780		0.187577	341570		0.190857	341410		0.191597	0.189821	0.00213923
321	322320		0.188478	337440		0.188549	340400		0.19103	0.18962	0.00145342
324	322970		0.188858	339490		0.189694	341830		0.191832	0.189889	0.00153403
327	320520		0.187425	336500		0.188024	340550		0.191114	0.188804	0.00197979
330	321620		0.188068	337130		0.188376	340280		0.190963	0.189036	0.00158971
333	319980		0.187109	337350		0.188499	339750		0.190665	0.188066	0.00179197
336	319150		0.186624	337900		0.188806	336050		0.188589	0.188096	0.00120188
339	319370		0.186753	336030		0.187761	336530		0.188858	0.186984	0.001053
342	316670		0.185174	333050		0.186096	332220		0.186439	0.186461	0.000654398
345	319760		0.186981	333120		0.186135	335200		0.188112	0.187353	0.000991808
348	313440		0.183285	331180		0.185051	336680		0.188942	0.185786	0.00289436
351	314170		0.183712	331740		0.185364	336820		0.189021	0.185316	0.0027168
354	311220		0.181987	329900		0.184336	332990		0.186872	0.184634	0.00244285
357	315210		0.18432	331570		0.185269	334250		0.187579	0.185154	0.00167592
360	315750		0.184636	329710		0.18423	331210		0.185873	0.185775	0.00085575
363	315790		0.184659	330950		0.184922	335820		0.18846	0.185322	0.00212226
366	311000		0.181858	330760		0.184816	332120		0.186383	0.183921	0.00229781
369	315980		0.18477	326580		0.182481	329810		0.185087	0.184077	0.00142219
372	311140		0.18194	324030		0.181056	329620		0.18498	0.182623	0.00205854
375	312190		0.182554	329590		0.184163	329430		0.184874	0.183987	0.00118829
378	309180		0.180794	327350		0.182911	330090		0.185244	0.182934	0.00222585
381	307350		0.179724	326420		0.182391	329830		0.185098	0.181838	0.00268709
384	313280		0.183192	325850		0.182073	326800		0.183398	0.183585	0.000712951
387	308500		0.180396	325870		0.182084	330530		0.185491	0.182588	0.00259517
390	310930		0.181817	326430		0.182397	330160		0.185283	0.182509	0.00185652
393	310480		0.181554	322410		0.180151	326650		0.183314	0.181933	0.00158479
396	308870		0.180613	322180		0.180022	328040		0.184094	0.181135	0.00220007
399	308760		0.180549	319960		0.178782	325680		0.182769	0.180844	0.00199807
402	305430		0.178601	319590		0.178575	326450		0.183201	0.178588	0.00266347
