# Supplementary figures and images for: Cryo-EM structures of the caspase-activated protein XKR9 involved in apoptotic lipid scrambling
Source: eLife journal article supplement (doi:10.7554/elife.69800), 2021-07-15

Figure 1 – source data 5

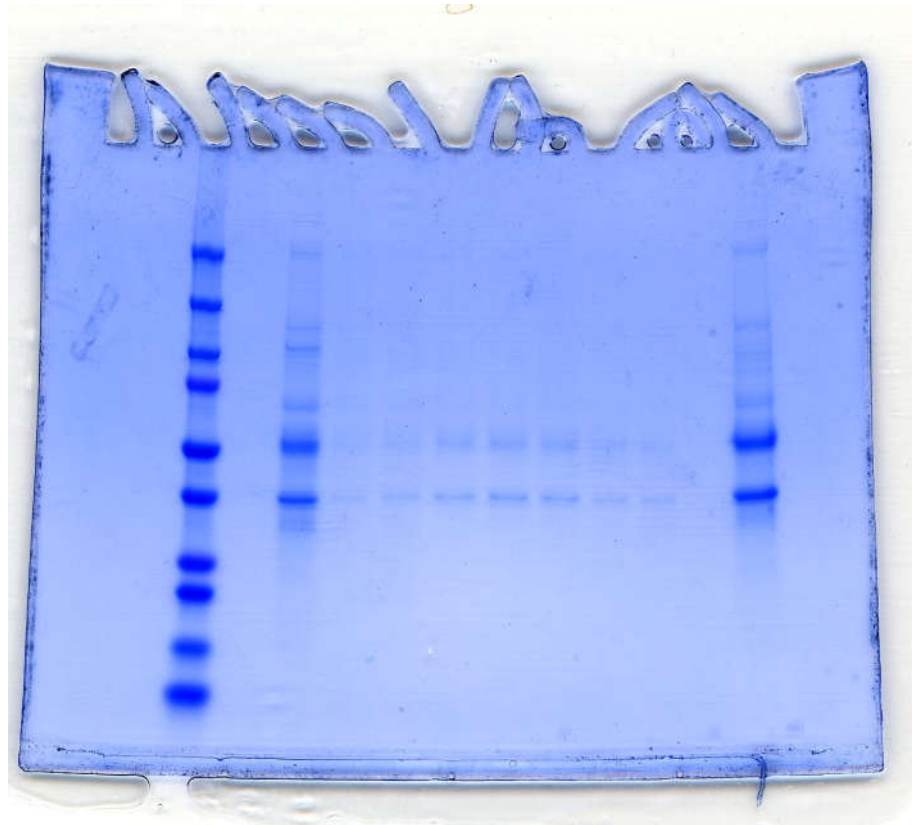

Gel lane shown in Figure 1E

\* XKR8  
# basigin

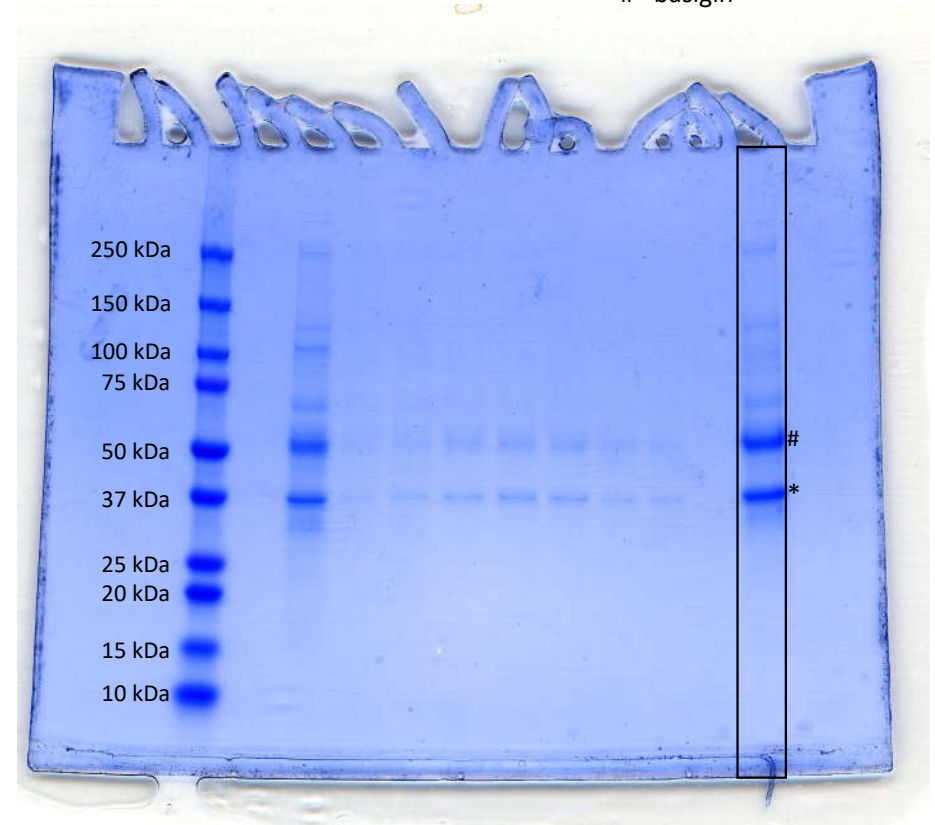

Supplement: supp [file elife-69800-supp-v1.zip]

Figure 1 – source data 1

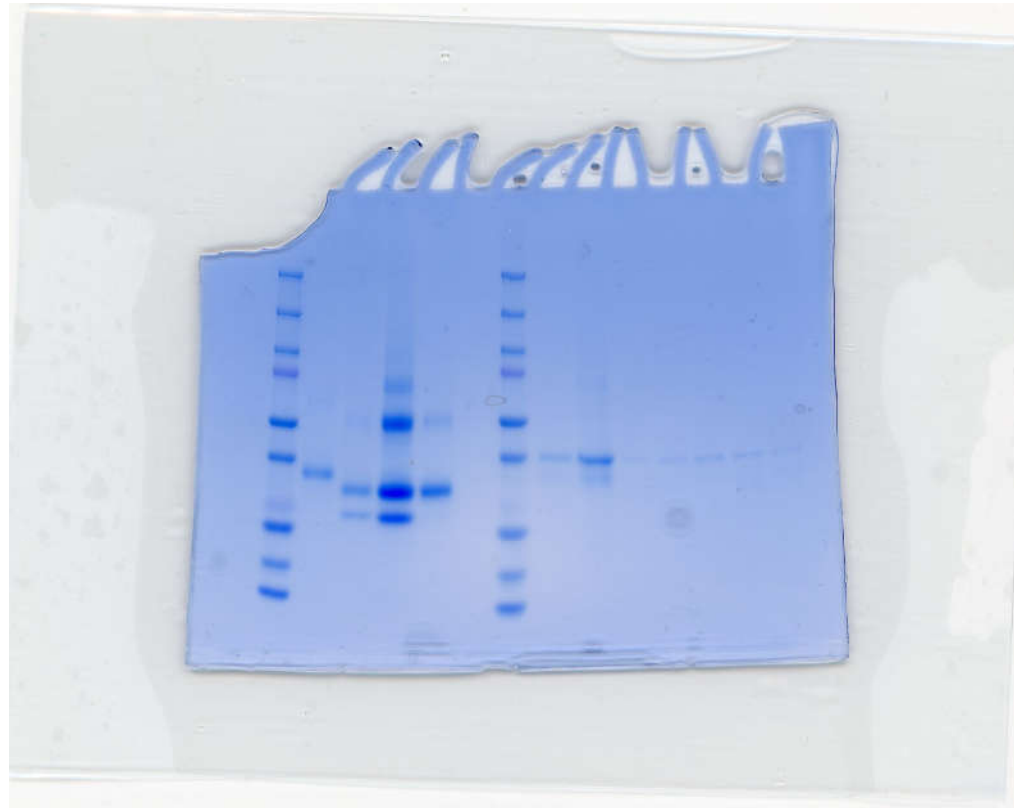

Gel lane shown in Figure 1A

\* full-length rXKR9

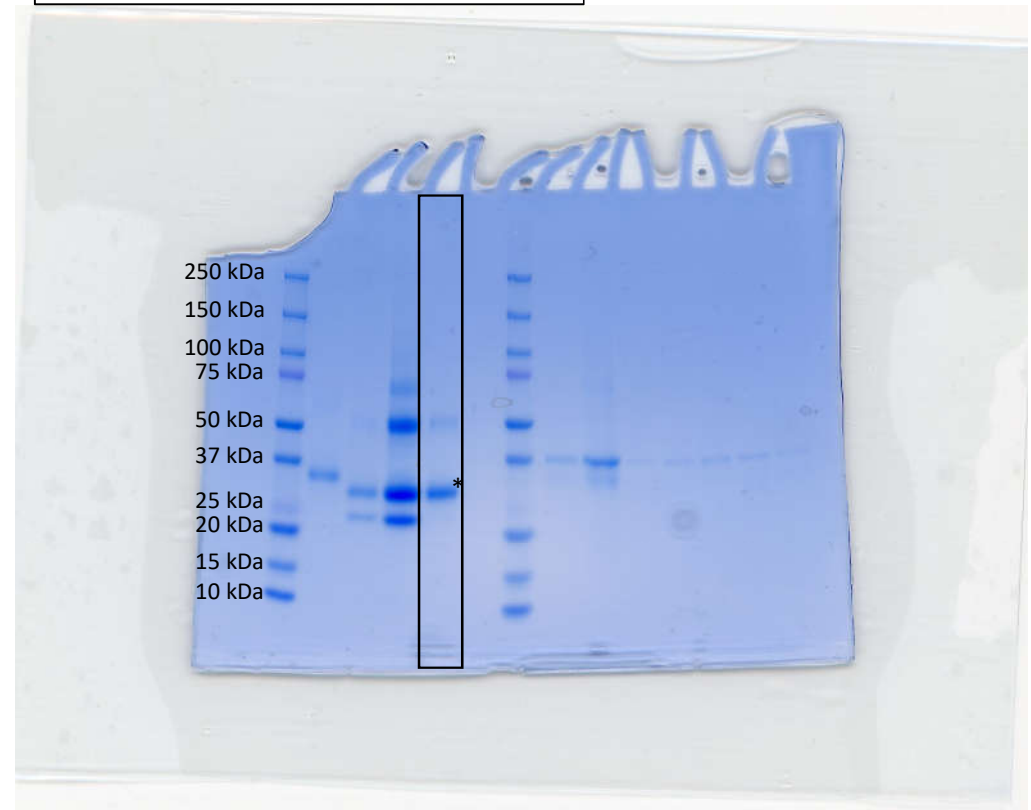

Supplement: supp [file elife-69800-supp-v1.zip]

**A**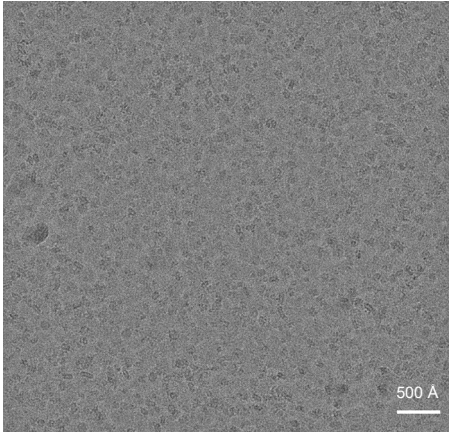**B**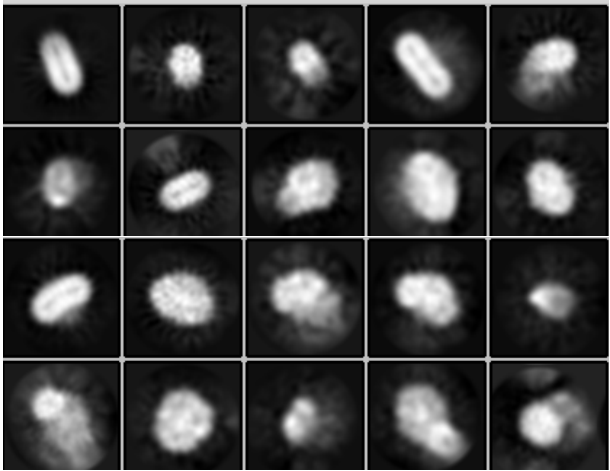**C**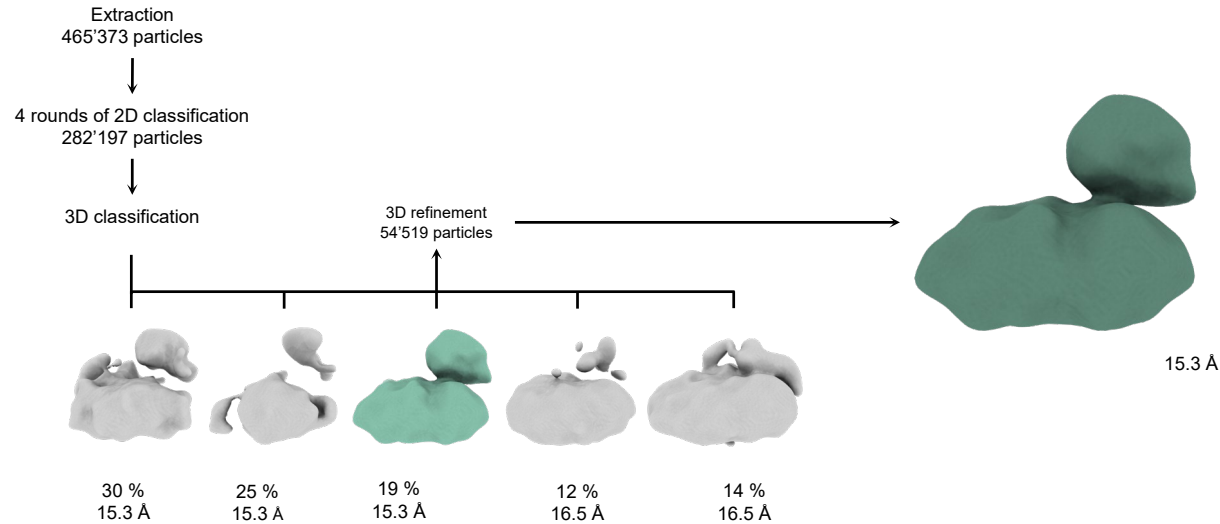

Supplement: supp [file elife-69800-supp-v1.zip]

Figure 1 – source data 6

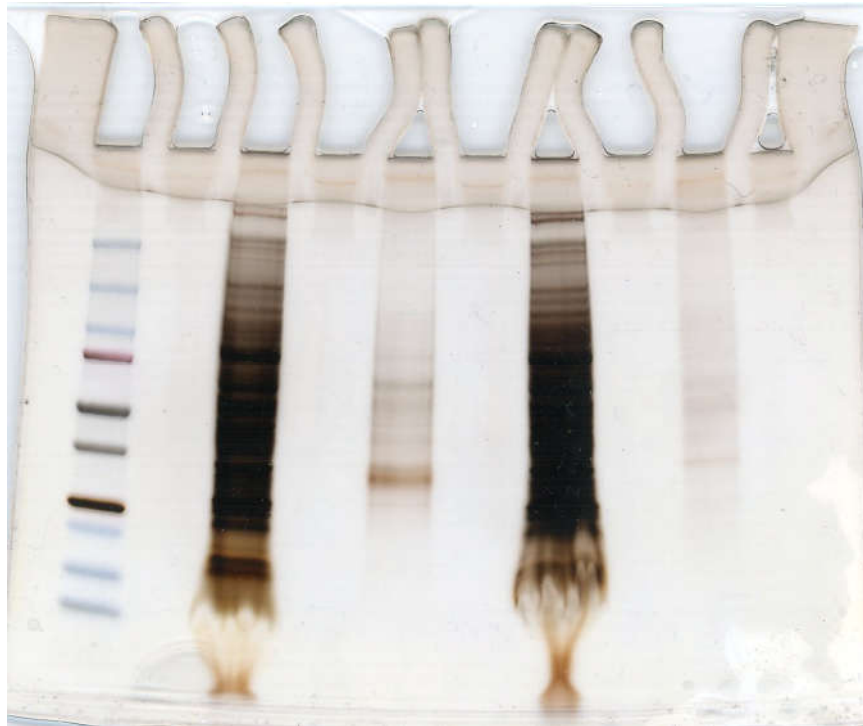

Gel lane shown in Figure 1G

\* rXKR9

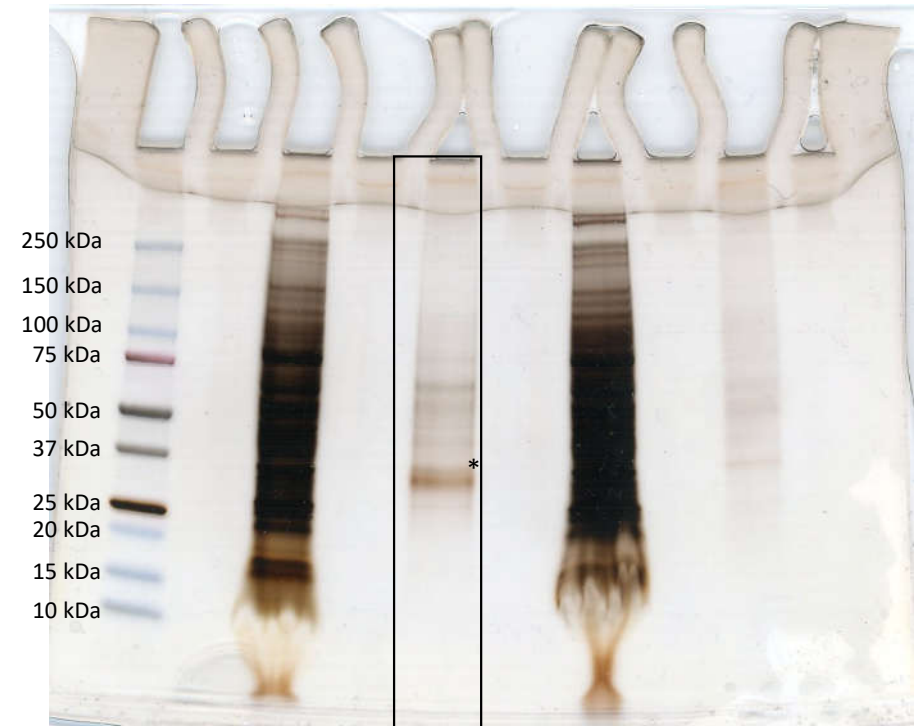

Supplement: supp [file elife-69800-supp-v1.zip]

Figure 1 – figure supplement 3 – source data 2

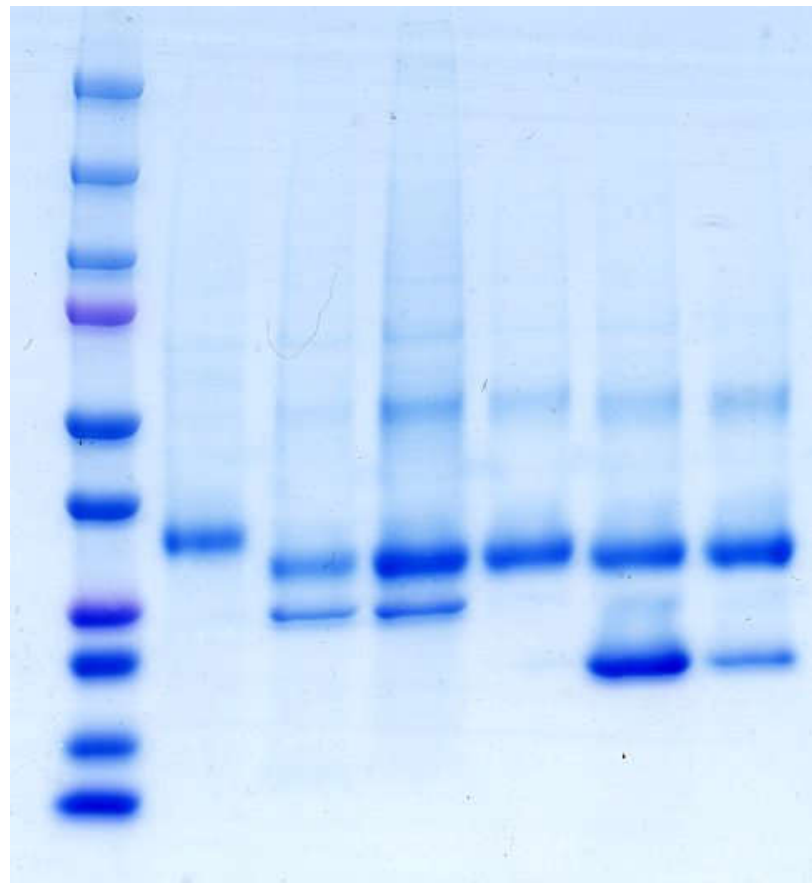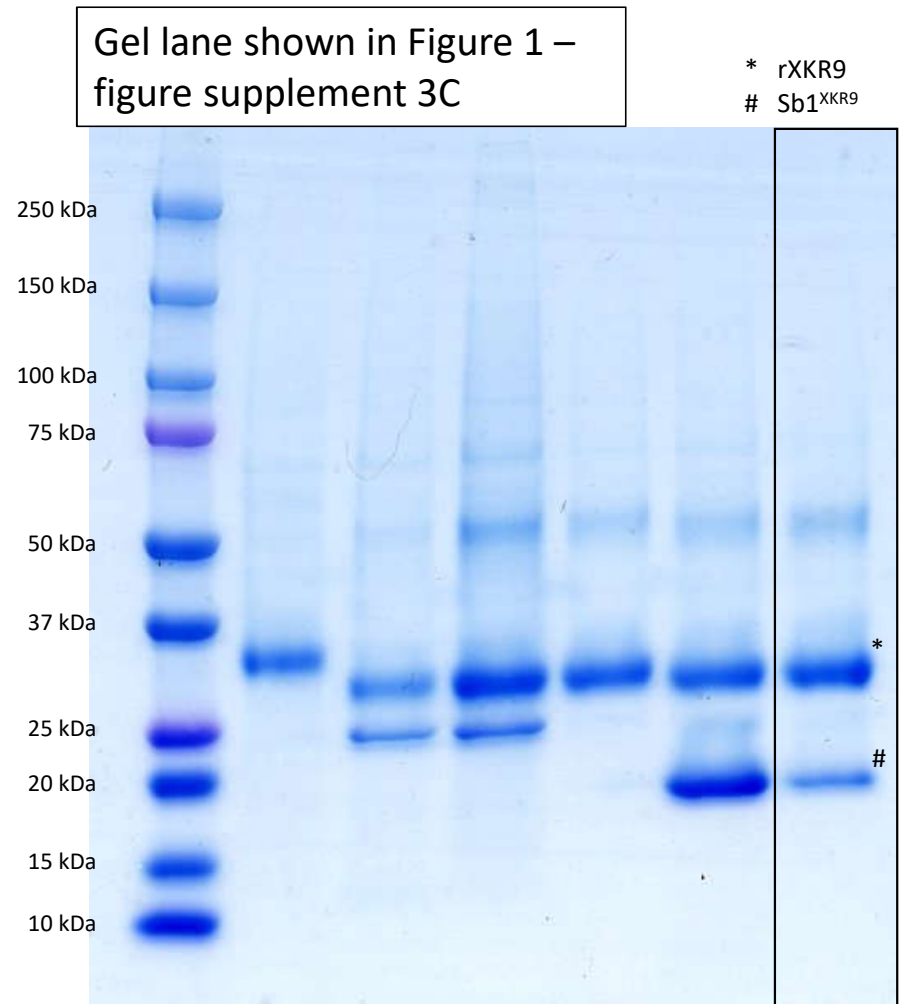

Supplement: supp [file elife-69800-supp-v1.zip]

Figure 1 – source data 7

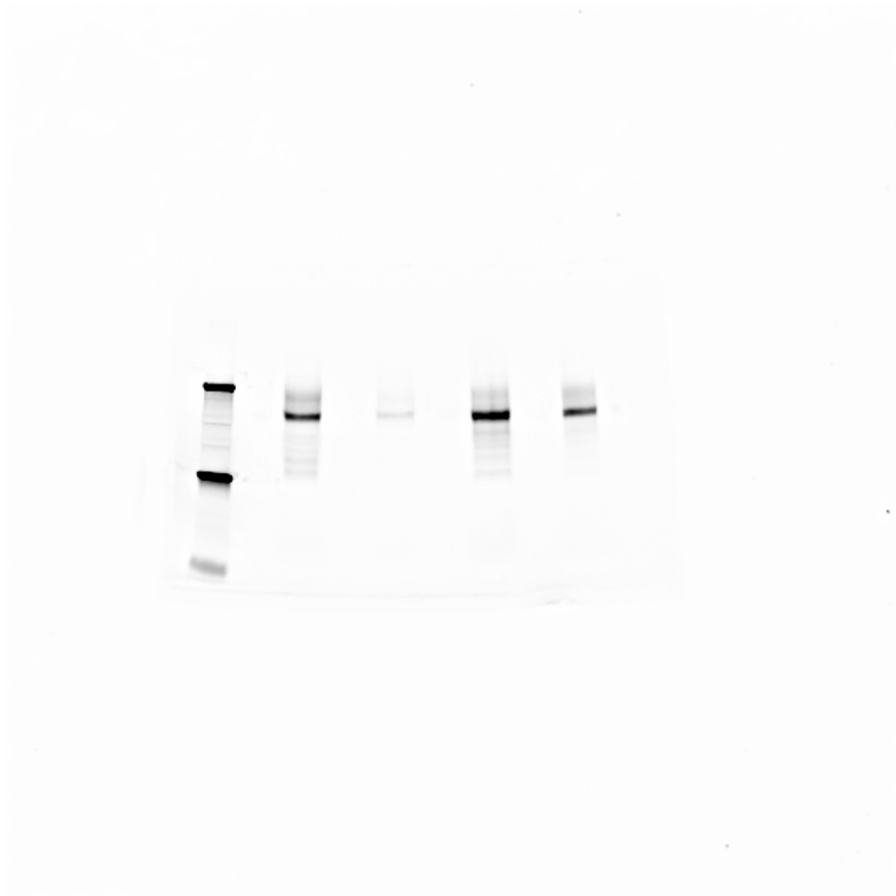

Gel lanes shown in Figure 1G

\* basigin

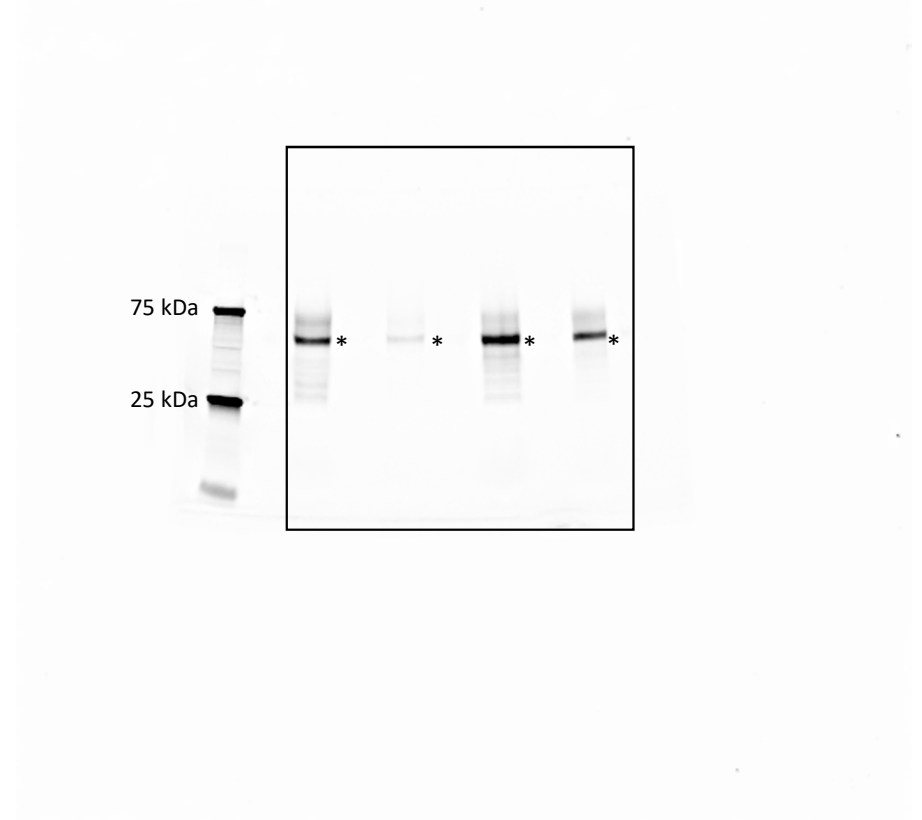

Supplement: supp [file elife-69800-supp-v1.zip]

Figure 1 – source data 2

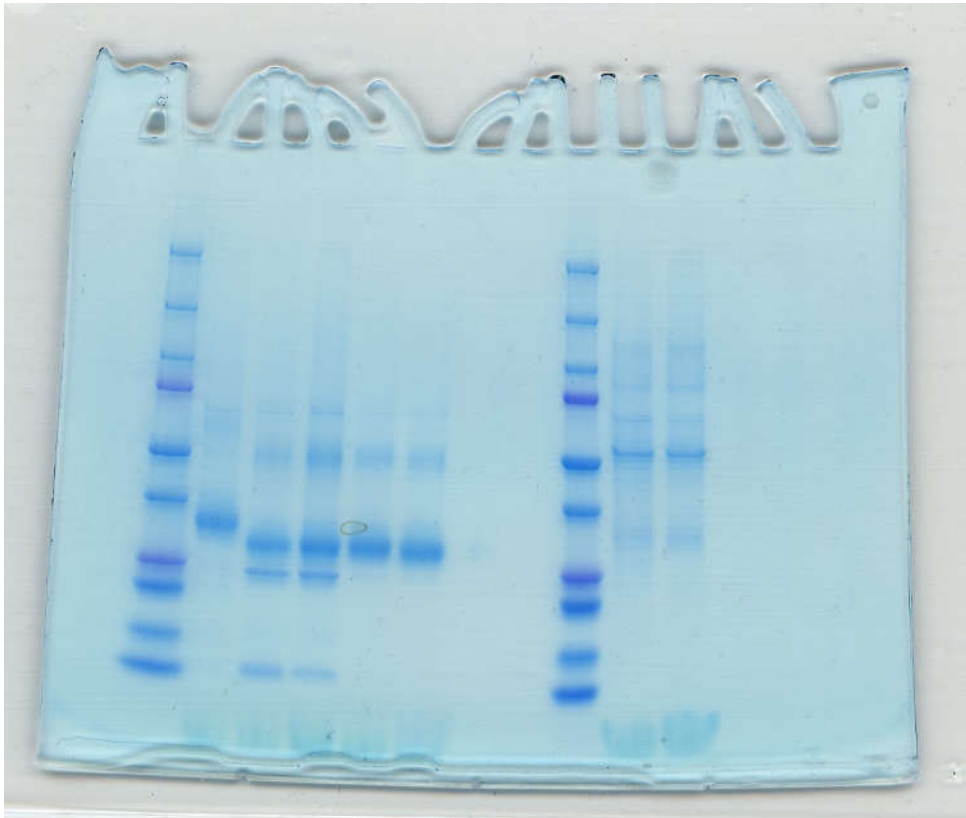

Gel lane shown in Figure 1B

\* caspase-3 treated rXKR9

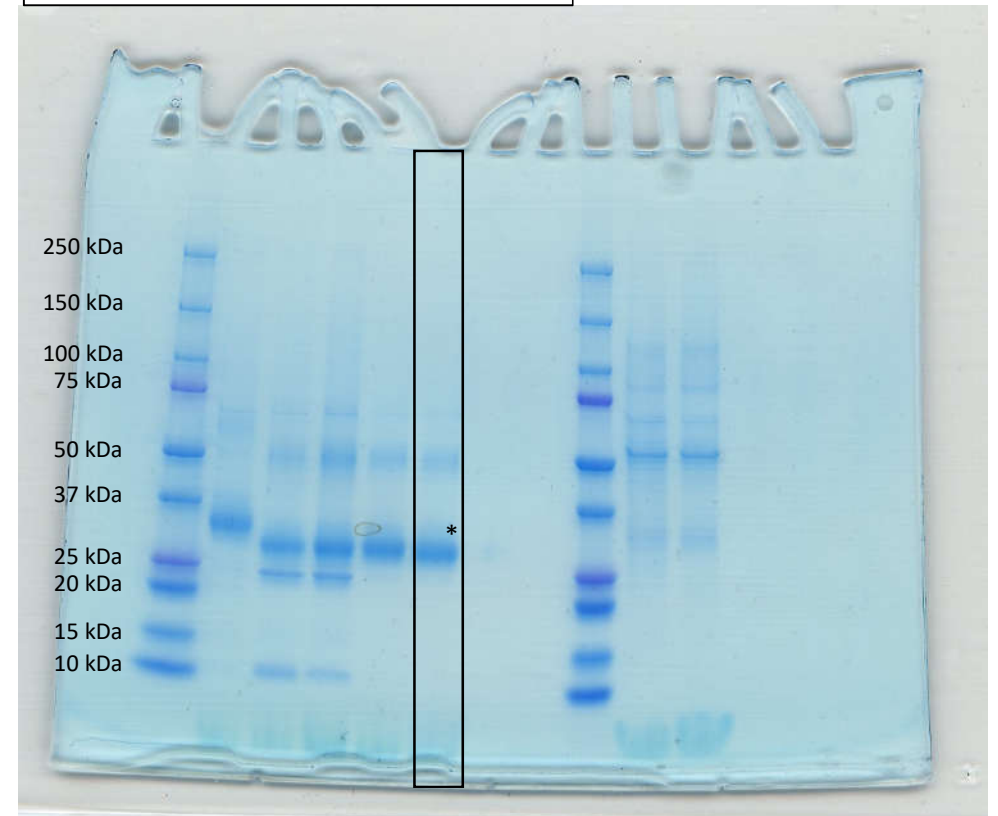

Supplement: supp [file elife-69800-supp-v1.zip]

**A**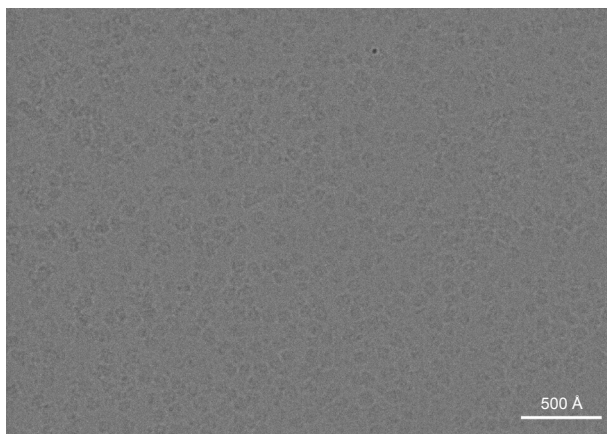**B**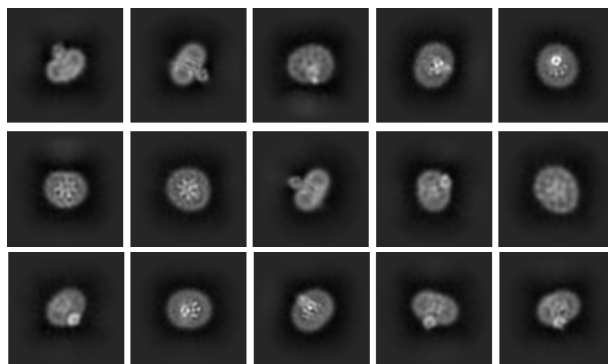**C**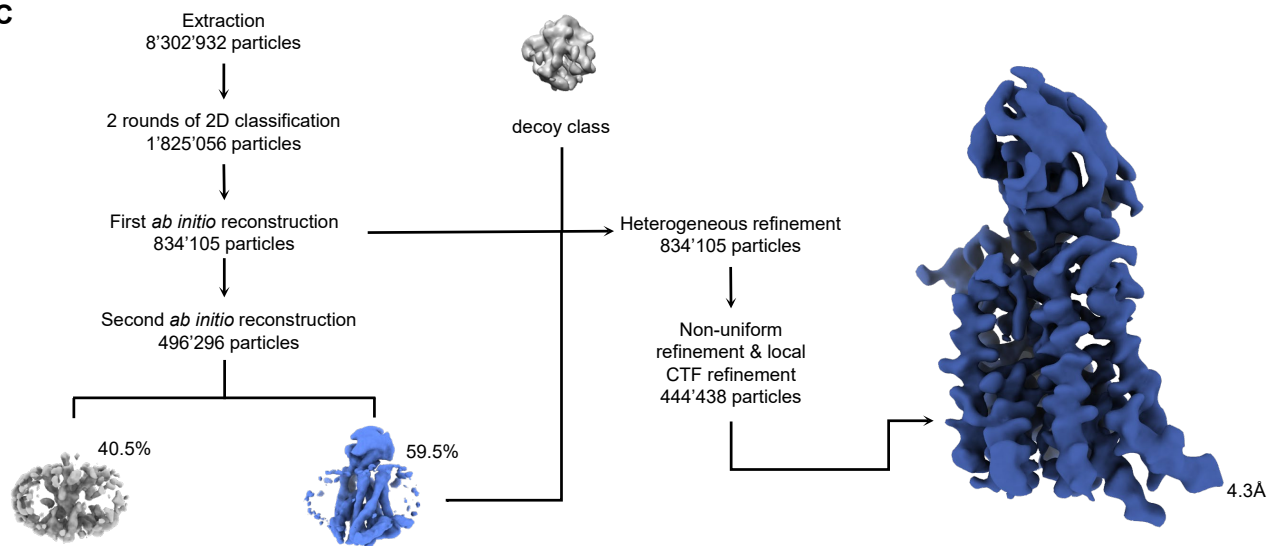**D**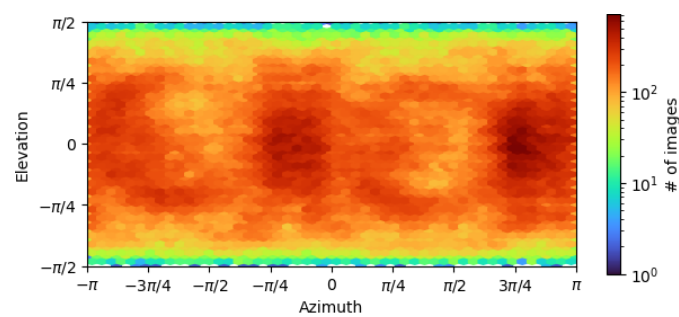**E**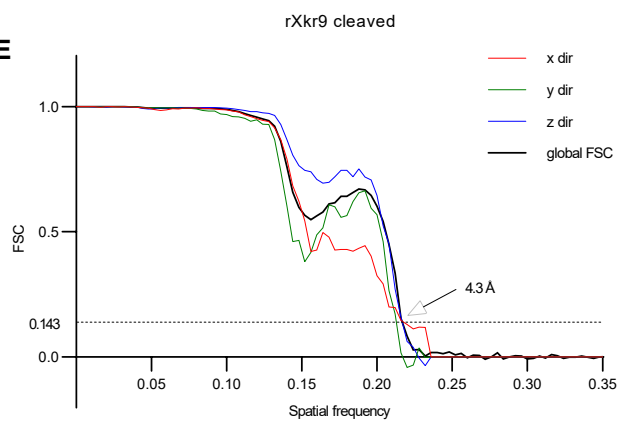**F**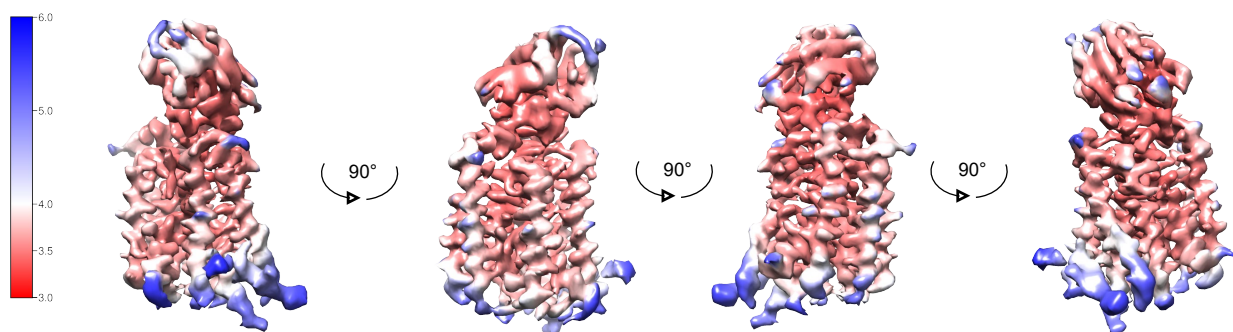

Supplement: supp [file elife-69800-supp-v1.zip]

**A**full-length rXKR9/Sb1<sup>XKR9</sup>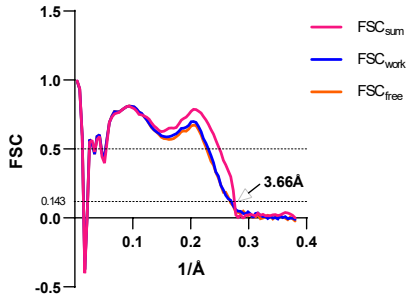**B**caspase-3 treated rXKR9/Sb1<sup>XKR9</sup>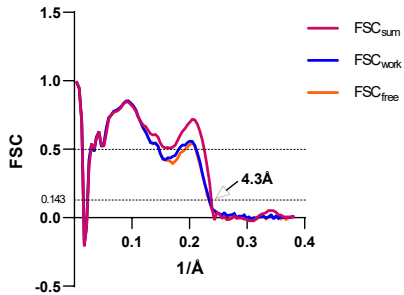

Supplement: supp [file elife-69800-supp-v1.zip]

Figure 1 – source data 3

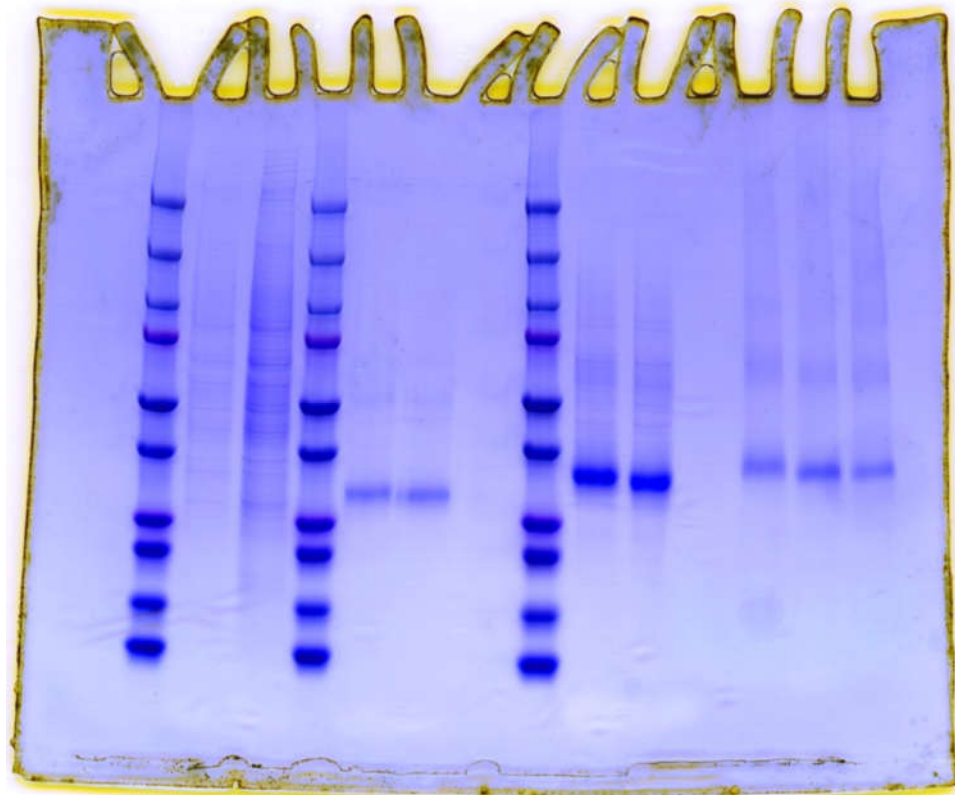

Gel lanes shown in Figure 1C

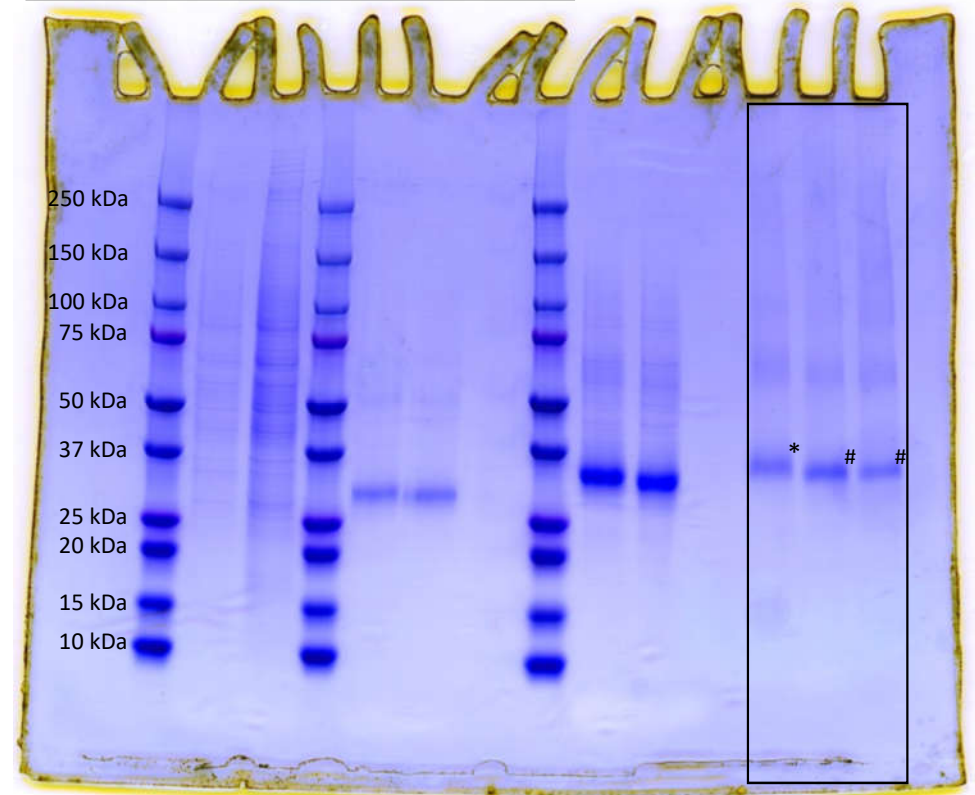

Supplement: supp [file elife-69800-supp-v1.zip]
